# Supplementary material
Source: PubMed Central journal article supplement (PMC6243238)
Supplement: pnas.1813993115.sapp.pdf [file pnas.1813993115.sapp.pdf]

## SUPPORTING INFORMATION

### Gene-guided discovery and engineering of branched cyclic peptides in plants

Roland D. Kersten<sup>a,1</sup>, Jing-Ke Weng<sup>a,b,1</sup>

<sup>a</sup> Whitehead Institute for Biomedical Research, 455 Main Street, Cambridge, MA, United States

<sup>b</sup> Department of Biology, Massachusetts Institute of Technology, Cambridge, MA, United States

<sup>1</sup> Corresponding authors: Roland D. Kersten, E-mail: [rkersten@wi.mit.edu](mailto:rkersten@wi.mit.edu), Jing-Ke Weng, E-mail: [wengj@wi.mit.edu](mailto:wengj@wi.mit.edu)

## Table of contents

| Figure/Table | Description                                                                                                                                                                        | Page  |
|--------------|------------------------------------------------------------------------------------------------------------------------------------------------------------------------------------|-------|
| Table S1     | NMR data of lyciumin A                                                                                                                                                             | 10    |
| Table S2     | NMR data of lyciumin B                                                                                                                                                             | 11    |
| Table S3     | NMR data of lyciumin D                                                                                                                                                             | 12    |
| Table S4     | Genome mining of candidate lyciumin precursor genes in plants                                                                                                                      | 13    |
| Table S5     | Core peptide sequences from predicted lyciumin precursor genes                                                                                                                     | 14    |
| Table S6     | NMR data of lyciumin C                                                                                                                                                             | 15    |
| Table S7     | NMR data of lyciumin I                                                                                                                                                             | 16    |
| Table S8     | Bioinformatic analysis of lyciumin precursor genes and co-clustered glutamine cyclotransferase genes in genomes of <i>Beta vulgaris</i> and <i>Chenopodium quinoa</i>              | 17    |
| Table S9     | LC-MS dataset accessions (MassIVE, GNPS)                                                                                                                                           | 17    |
| Figure S1    | MS analysis of lyciumin A                                                                                                                                                          | 18    |
| Figure S2    | <sup>1</sup> H NMR spectrum of lyciumin A                                                                                                                                          | 19    |
| Figure S3    | <sup>13</sup> C NMR spectrum of lyciumin A                                                                                                                                         | 19    |
| Figure S4    | MS analysis of lyciumin B                                                                                                                                                          | 20    |
| Figure S5    | <sup>1</sup> H NMR spectrum of lyciumin B                                                                                                                                          | 21    |
| Figure S6    | MS analysis of lyciumin D                                                                                                                                                          | 22    |
| Figure S7    | <sup>1</sup> H NMR of spectrum lyciumin D                                                                                                                                          | 23    |
| Figure S8    | Candidate transcripts of lyciumin precursor peptide gene from <i>Lycium barbarum</i> root transcriptome                                                                            | 24    |
| Figure S9    | Signal peptide prediction of LbaLycA with SignalP-4.1                                                                                                                              | 24    |
| Figure S10   | Precursor gene-guided genome mining workflow for lyciumin discovery                                                                                                                | 25    |
| Figure S11   | Genome mining of lyciumins from <i>Amaranthus hypochondriacus</i>                                                                                                                  | 26/27 |
| Figure S12   | <sup>1</sup> H NMR spectrum of lyciumin C                                                                                                                                          | 28    |
| Figure S13   | Genome mining of lyciumins from <i>Beta vulgaris</i>                                                                                                                               | 29/30 |
| Figure S14   | Genome mining of lyciumins from <i>Chenopodium quinoa</i>                                                                                                                          | 31/32 |
| Figure S15   | Genome mining of lyciumins from <i>Glycine max</i>                                                                                                                                 | 33-35 |
| Figure S16   | <sup>1</sup> H NMR of spectrum of lyciumin I                                                                                                                                       | 36    |
| Figure S17   | <sup>1</sup> H- <sup>1</sup> H COSY spectrum of lyciumin I                                                                                                                         | 37    |
| Figure S18   | <sup>1</sup> H- <sup>1</sup> H TOCSY spectrum of lyciumin I                                                                                                                        | 38    |
| Figure S19   | <sup>1</sup> H- <sup>13</sup> C HSQC spectrum of lyciumin I                                                                                                                        | 39    |
| Figure S20   | <sup>1</sup> H- <sup>13</sup> C HMBC spectrum of lyciumin I                                                                                                                        | 40    |
| Figure S21   | <sup>1</sup> H- <sup>1</sup> H ROESY spectrum of lyciumin I                                                                                                                        | 41    |
| Figure S22   | Genome mining of lyciumins from <i>Solanum melongena</i>                                                                                                                           | 42/43 |
| Figure S23   | Genome mining of lyciumins from <i>Medicago truncatula</i>                                                                                                                         | 44    |
| Figure S24   | Lyciumin precursor gene expression in <i>Amaranthus hypochondriacus</i> , <i>Chenopodium quinoa</i> , <i>Glycine max</i> , <i>Medicago truncatula</i> and <i>Solanum tuberosum</i> | 45    |
| Figure S25   | Lyciumin chemotyping in source plant tissues                                                                                                                                       | 46    |
| Figure S26   | Genome and transcriptome mining of lyciumins from <i>Solanum tuberosum</i>                                                                                                         | 47-55 |
| Figure S27   | Detection of candidate dehydrothreonine-lyciumin derivatives in Amaranthaceae                                                                                                      | 56-60 |
| Figure S28   | Phylogenetic analysis of predicted and characterized lyciumin precursors from analyzed plant genomes                                                                               | 61    |
| Figure S29   | Detection of [Gln]-lyciumins after heterologous expression of <i>LbaLycA</i> in <i>Nicotiana benthamiana</i>                                                                       | 62-64 |
| Figure S30   | Characterization of <i>Lycium barbarum</i> glutamine cyclotransferase (LbaQC)                                                                                                      | 65    |
| Figure S31   | Detection of C-terminally extended lyciumins after <i>LbaLycA</i> heterologous expression in <i>Nicotiana benthamiana</i>                                                          | 66-70 |
| Figure S32   | Heterologous expression of <i>Sali3-2</i> -[QAYGVYTW] in <i>Nicotiana benthamiana</i>                                                                                              | 71    |
| Figure S33   | Heterologous expression of <i>Sali3-2</i> -[QPAGVYTW] in <i>Nicotiana benthamiana</i>                                                                                              | 72    |
| Figure S34   | Heterologous expression of <i>Sali3-2</i> -[QPYAVYTW] in <i>Nicotiana benthamiana</i>                                                                                              | 73    |
| Figure S35   | Heterologous expression of <i>Sali3-2</i> -[QPYGAYTW] in <i>Nicotiana benthamiana</i>                                                                                              | 74    |
| Figure S36   | Heterologous expression of <i>Sali3-2</i> -[QPYGVATW] in <i>Nicotiana benthamiana</i>                                                                                              | 75    |
| Figure S37   | Heterologous expression of <i>Sali3-2</i> -[QPYGVYAW] in <i>Nicotiana benthamiana</i>                                                                                              | 76    |
| Figure S38   | Heterologous expression of <i>Sali3-2</i> -[QPYTVYTW] in <i>Nicotiana benthamiana</i>                                                                                              | 77/78 |
| Figure S39   | Heterologous expression of <i>Sali3-2</i> -[QPWGVGTW] in <i>Nicotiana benthamiana</i>                                                                                              | 79    |
| Figure S40   | Heterologous expression of <i>Sali3-2</i> -[QPWGVGAW] in <i>Nicotiana benthamiana</i>                                                                                              | 80    |
| Figure S41   | Heterologous expression of <i>Sali3-2</i> -[QPWGVYTW] in <i>Nicotiana benthamiana</i>                                                                                              | 81    |
| Figure S42   | Heterologous expression of <i>Sali3-2</i> -[QPFVYTW] in <i>Nicotiana benthamiana</i>                                                                                               | 82    |
| Figure S43   | Heterologous expression of <i>Sali3-2</i> -[QPFVFFSW] in <i>Nicotiana benthamiana</i>                                                                                              | 83    |
| Figure S44   | Heterologous expression of <i>Sali3-2</i> -[QPYGVYFW] in <i>Nicotiana benthamiana</i>                                                                                              | 84    |
| Figure S45   | Heterologous expression of <i>Sali3-2</i> -[QPWGVYSW] in <i>Nicotiana benthamiana</i>                                                                                              | 85    |

## SUPPORTING TEXT

### Chemotyping of lyciumin peptides from plant material

For comparative chemotyping of lyciumin concentrations in different plant tissues, peptides were extracted from plant tissues as described above from three different plants of the same age. Analyzed tissues of *Amaranthus hypochondriacus* and *Chenopodium quinoa* (three month old) were flower, leaf, root, seed and stem. Analyzed tissues of *Beta vulgaris* (three month old) were leaf, root, seed and stem. Analyzed tissues of *Glycine max* (three month old) were bean, leaf, pod, root and stem. Analyzed tissues for *Solanum tuberosum* (three week old) were sprout and tuber. Peptide extracts were subjected to low resolution MS analysis by selected-ion monitoring (SIM) of lyciumin masses specific to each plant with the following LC-MS parameters: LC – Phenomenex Kinetex® 2.6 µm C18 reverse phase 100 Å 150 x 3 mm LC column, LC gradient: solvent A – 0.1% formic acid, solvent B – acetonitrile (0.1% formic acid), 0-1 min: 5% B, 1-8 min: 5-95% B, 8-10 min: 95% B, 10-15 min: 5% B, MS – positive ion mode, SIM (*Amaranthus hypochondriacus*: 872.8-873.8 m/z and 963.8-964.8 m/z, *Chenopodium quinoa*: 869.8-870.8 m/z and 972.8-973.8 m/z, *Beta vulgaris*: 894.8-895.8 m/z, *Glycine max*: 910.8-911.8 m/z and 993.8-994.8 m/z, *Solanum tuberosum*: 880.8-881.8 m/z, 896.8-897.8 m/z, 913.8-914.8 m/z, 922.8-923.8 m/z, 947.8-948.8 m/z, 972.8-973.8 m/z and 1048.8-1049.8 m/z). Lyciumin ion abundance values were determined by peak area integration from each lyciumin SIM chromatogram in QualBrowser in the Thermo Xcalibur software package (version 3.0.63, ThermoScientific).

### Phylogenetic analysis of lyciumin precursor peptides

Protein sequences of characterized and predicted lyciumin precursors from genomes (Dataset S1, except 3'-partial sequences) and four founding members of the BURP domain family (NP\_001303011.1 - BURP domain-containing protein BNM2A precursor [*Brassica napus*], NP\_001234835.1 - Polygalacturonase-1 non-catalytic subunit beta precursor [*Solanum lycopersicum*], CAA31603.1/CAA31602.1 - Embryonic abundant protein USP87 / Embryonic abundant protein USP92 [*Vicia faba*], NP\_197943.1 - BURP domain protein RD22 [*Arabidopsis thaliana*]) (1-4) were reduced to their BURP domain (Pfam PF03181) and aligned using Muscle algorithm (5) in MEGA (ver. 7.0.9) (6). A neighbor-joining phylogenetic tree was generated with 2000 bootstrap generations using the p-distance method (7) in MEGA.

### Lyciumin engineering in *Nicotiana benthamiana*

IDT gblocks® of *Sali3-2* for lyciumin engineering (from Figure 4B, core peptide sequences are in [brackets]):

```
>Sali3-2
ATGGAATTCGATGCTCAGTCATCTCTTTTACCATTCTCTTCTCTCTTGGCTCTTGCAGGAGAGAGCCATGTCCATGCATCGTACCTGAGGAAGATTATTGGGAAGCTGTT
TGGCCAAACACTCCCATTCCCAGTGCAGTGCAGAGAGCTTCTAAAGCCTCTCCCTGCAGGTGTTGAAATCGATGAACTCCCTAAGCAAATTTGATGATACACAGTACCCAAAA
ACATTTCTTCTATAAAGAAGACCTTCATCCAGGCAAAAACAATGAAAGTACAATTCACCAAGCGTCCCTATGCACAACCTTATGGTGTATATACATGGTTAACGGATATTAAA
GACACCTCTAAGAAGGATATAGTTTTGAAGAGATATGCATCAAGAAGAAGCGTTTGAGGAGAGAAGAGAAATTTGTGCAAAATCCTTGGGAACAGTAATTTGGTTTTGCC
ATTTCAAAGCTGGGAAGAAGACATTCAAGTACTTTCAAGTTCCTTTGTCAATAAGCAAGAGCAATACACTGTGGAAGGAGTGCAGAAATCTGGAGACAAAGCAGTATGTGT
CATGGGCTAAATTCAGAAGTGCAGTATTTTACTGCCATAAAGTCCGTGAAACAACAGCTTTCATGGTTCCATTGGTGGCTGGTATGGAACCAAACTCAGGCACCTTGCT
GTTTGCCACTCAGATACTTCTGGAATGAATCATCATGCTTTCATGAACTCATGGGAGTTGATCCTGGAACTAACCCCTGTTTGCCATTTCTTGGGAAGCAAGGCCATTTTA
TGGGTACCCAATTTATCTATGGACACTGCCTATCAGACTAACGTTGTTGTTTAA
```

```
>Sali3-2-[QPWGVYTW]
ATGGAATTCGATGCTCAGTCATCTCTTTTACCATTCTCTTCTCTCTTGGCTCTTGCAGGAGAGAGCCATGTCCATGCATCGTACCTGAGGAAGATTATTGGGAAGCTGTT
TGGCCAAACACTCCCATTCCCAGTGCAGTGCAGAGAGCTTCTAAAGCCTCTCCCTGCAGGTGTTGAAATCGATGAACTCCCTAAGCAAATTTGATGATACACAGTACCCAAAA
ACATTTCTTCTATAAAGAAGACCTTCATCCAGGCAAAAACAATGAAAGTACAATTCACCAAGCGTCCCTATGCACAACCTTGGGGTGTATATACATGGTTAACGGATATTAAA
GACACCTCTAAGAAGGATATAGTTTTGAAGAGATATGCATCAAGAAGAAGCGTTTGAGGAGAGAAGAGAAATTTGTGCAAAATCCTTGGGAACAGTAATTTGGTTTTGCC
ATTTCAAAGCTGGGAAGAAGACATTCAAGTACTTTCAAGTTCCTTTGTCAATAAGCAAGAGCAATACACTGTGGAAGGAGTGCAGAAATCTGGAGACAAAGCAGTATGTGT
CATGGGCTAAATTCAGAAGTGCAGTATTTTACTGCCATAAAGTCCGTGAAACAACAGCTTTCATGGTTCCATTGGTGGCTGGTATGGAACCAAACTCAGGCACCTTGCT
GTTTGCCACTCAGATACTTCTGGAATGAATCATCATGCTTTCATGAACTCATGGGAGTTGATCCTGGAACTAACCCCTGTTTGCCATTTCTTGGGAAGCAAGGCCATTTTA
TGGGTACCCAATTTATCTATGGACACTGCCTATCAGACTAACGTTGTTGTTTAA
```

```
>Sali3-2-[QPYGVYFW]
ATGGAATTCGATGCTCAGTCATCTCTTTTACCATTCTCTTCTCTCTTGGCTCTTGCAGGAGAGAGCCATGTCCATGCATCGTACCTGAGGAAGATTATTGGGAAGCTGTT
TGGCCAAACACTCCCATTCCCAGTGCAGTGCAGAGAGCTTCTAAAGCCTCTCCCTGCAGGTGTTGAAATCGATGAACTCCCTAAGCAAATTTGATGATACACAGTACCCAAAA
ACATTTCTTCTATAAAGAAGACCTTCATCCAGGCAAAAACAATGAAAGTACAATTCACCAAGCGTCCCTATGCACAACCTTATGGTGTATATTTCTGGTTAACGGATATTAAA
GACACCTCTAAGAAGGATATAGTTTTGAAGAGATATGCATCAAGAAGAAGCGTTTGAGGAGAGAAGAGAAATTTGTGCAAAATCCTTGGGAACAGTAATTTGGTTTTGCC
ATTTCAAAGCTGGGAAGAAGACATTCAAGTACTTTCAAGTTCCTTTGTCAATAAGCAAGAGCAATACACTGTGGAAGGAGTGCAGAAATCTGGAGACAAAGCAGTATGTGT
```





CATGGGCTAAATTCAGAACTGCAGTATTTACTGCCATAAAGTCCGTGAAACAACAGCTTTCATGGTTCATTGGTGGCTGGTATGGAACCAAACTCAGGCCTTGCT  
GTTTGCCACTCAGATACTTCTGGAATGAATCATCATGCTTTCATGAACTCATGGGAGTTGATCCTGGAACCTAACCCCTGTTTGGCCATTTCTTGGAGCAAGGCCATTTTA  
TGGGTACCAATTTATCTATGGACTGCCTATCAGACTAACGTTGTTGTTTAA

>Sali3-2- [QYGVYTW]

ATGGAATTCGATGCTCAGTCACTCTCTTTTACCATTCTCTTCTCTCTTGGCTCTTGCAGGAGAGGCCATGTCCATGCATCGTACCTGAGGAAGATTATGGGAAGCTGTT  
TGGCCAAACACTCCCATTCCCCTGCAGTGCAGAGCTTCTAAAGCCTCTCCCTGCAGGTGTTGAAATCGATGAACTCCCTAAGCAAATTTGATGATACACAGTACCCAAAA  
ACATTTCTTATAAAGAAGACCTTCCATCCAGGCAAAACAATGAAAGTACAATTCACCAAGCGTCCCTATGCACAATATGGTGTATATACATGGTTAACGGATATTAAAGAC  
ACCTCTAAAGAAGGATATAGTTTGAAGAGATATGCATCAAGAAAGAAGCGTTTGGAGGAGAAGAGAAGTTTGTGCAAAAATCCTTGGGAACAGTAATTTGGTTTGGCCATT  
TCAAAGCTGGGAAAGAACATTCAGTACTTTCAAGTTCCTTTGTCAATAAGCAAGAGCAATACACTGTGGAAGGAGTGCAGAATCTTGGAGACAAAGCAGTGTATGTCAT  
GGGCTAAATTCAGAACTGCAGTATTTACTGCCATAAAGTCCGTGAAACAACAGCTTTCATGGTTCATTGGTGGCTGGTATGGAACCAAACTCAGGCCTTGCTGTT  
TGCCACTCAGATACTTCTGGAATGAATCATCATGCTTTCATGAACTCATGGGAGTTGATCCTGGAACCTAACCCCTGTTTGGCCATTTCTTGGAGCAAGGCCATTTTATGG  
GTACCAATTTATCTATGGACTGCCTATCAGACTAACGTTGTTGTTTAA

>Sali3-2- [QGVYTW]

ATGGAATTCGATGCTCAGTCACTCTCTTTTACCATTCTCTTCTCTCTTGGCTCTTGCAGGAGAGGCCATGTCCATGCATCGTACCTGAGGAAGATTATGGGAAGCTGTT  
TGGCCAAACACTCCCATTCCCCTGCAGTGCAGAGCTTCTAAAGCCTCTCCCTGCAGGTGTTGAAATCGATGAACTCCCTAAGCAAATTTGATGATACACAGTACCCAAAA  
ACATTTCTTATAAAGAAGACCTTCCATCCAGGCAAAACAATGAAAGTACAATTCACCAAGCGTCCCTATGCACAAGGTGTATATACATGGTTAACGGATATTAAAGACACC  
TCTAAAGAGGATATAGTTTGAAGAGATATGCATCAAGAAAGAAGCGTTTGGAGGAGAAGAGAAGTTTGTGCAAAAATCCTTGGGAACAGTAATTTGGTTTGGCCATTTCA  
AAGCTGGGAAAGAACATTCAGTACTTTCAAGTTCCTTTGTCAATAAGCAAGAGCAATACACTGTGGAAGGAGTGCAGAATCTTGGAGACAAAGCAGTGTATGTCATGGG  
CTAAATTCAGAACTGCAGTATTTACTGCCATAAAGTCCGTGAAACAACAGCTTTCATGGTTCATTGGTGGCTGGTATGGAACCAAACTCAGGCCTTGCTGTTTGC  
CACTCAGATACTTCTGGAATGAATCATCATGCTTTCATGAACTCATGGGAGTTGATCCTGGAACCTAACCCCTGTTTGGCCATTTCTTGGAGCAAGGCCATTTTATGGGTA  
CCCAATTTATCTATGGACTGCCTATCAGACTAACGTTGTTGTTTAA

>Sali3-2- [QAPYGVYTW]

ATGGAATTCGATGCTCAGTCACTCTCTTTTACCATTCTCTTCTCTCTTGGCTCTTGCAGGAGAGGCCATGTCCATGCATCGTACCTGAGGAAGATTATGGGAAGCTGTT  
TGGCCAAACACTCCCATTCCCCTGCAGTGCAGAGCTTCTAAAGCCTCTCCCTGCAGGTGTTGAAATCGATGAACTCCCTAAGCAAATTTGATGATACACAGTACCCAAAA  
ACATTTCTTATAAAGAAGACCTTCCATCCAGGCAAAACAATGAAAGTACAATTCACCAAGCGTCCCTATGCACAAGCACCTTATGGTGTATATACATGGTTAACGGATATT  
AAAGACACCTCTAAAGAAGGATATAGTTTGAAGAGATATGCATCAAGAAAGAAGCGTTTGGAGGAGAAGAGAAGTTTGTGCAAAAATCCTTGGGAACAGTAATTTGGTTT  
GCCATTTCAAAGCTGGGAAAGAACATTCAGTACTTTCAAGTTCCTTTGTCAATAAGCAAGAGCAATACACTGTGGAAGGAGTGCAGAATCTTGGAGACAAAGCAGTGTATG  
TGTGATGGGCTAAATTCAGAACTGCAGTATTTTACTGCCATAAAGTCCGTGAAACAACAGCTTTCATGGTTCATTGGTGGCTGGTATGGAACCAAACTCAGGCCTT  
GCTGTTTGGCACTCAGATACTTCTGGAATGAATCATCATGCTTTCATGAACTCATGGGAGTTGATCCTGGAACCTAACCCCTGTTTGGCCATTTCTTGGAGCAAGGCCATT  
TTATGGGTACCAATTTATCTATGGACTGCCTATCAGACTAACGTTGTTGTTTAA

## Purification and structure elucidation of lyciumins

For lyciumin A, B and D isolation, *Lycium barbarum* roots (100 g wet weight) were ground with a tissue homogenizer and extracted for 16 h with methanol shaking at 225 rpm and 37 °C. For lyciumin C isolation, amaranth grain (4.5 kg) was ground in a tissue homogenizer and extracted for 16 h with methanol shaking at 225 rpm and 37 °C. Methanol extracts were filtered and dried *in vacuo*. Dried methanol extracts were resuspended in water and partitioned twice with hexane and twice with ethyl acetate and then extracted twice with n-butanol. n-butanol extracts were dried *in vacuo*. Dried n-butanol extracts were resuspended in 10% methanol and separated by flash liquid chromatography with Sephadex LH20 as a stationary phase and a gradient of 10-100% methanol as a mobile phase. Fractions were collected with a fraction collector and analyzed for lyciumin content by LC-QQQ-MS with the following LC-MS settings: LC – Phenomenex Kinetex® 2.6 µm C18 reverse phase 100 Å 150 x 3 mm LC column, LC gradient: solvent A – 0.1% formic acid, solvent B – acetonitrile (0.1% formic acid), 0.5 mL/min, 0-1 min: 5% B, 1-8 min: 5-95% B, 8-10 min: 95% B, 10-15 min: 5% B, MS – positive ion mode, Full MS: Lyciumin A/B/D - 860-920 m/z, Lyciumin C/I - 950-1010 m/z. LH20 fractions with lyciumins were combined, dried *in vacuo*, resuspended in 10% acetonitrile (0.1% trifluoroacetic acid) and subjected to preparative HPLC with a Phenomenex Kinetex® 5 µm C18 reverse phase 100 Å 150 x 21.2 mm LC column as a stationary phase for two rounds of separation. LC settings were as follows: solvent A – 0.1% trifluoroacetic acid, solvent B – acetonitrile (0.1% trifluoroacetic acid), 10 mL/min, Lyciumin A (20 mg) – 1.LC: 0-3 min: 10% B, 3-43 min: 10-50% B, 43-45 min: 50-95% B, 45-48 min: 95% B, 48-49 min: 95-10% B, 49-69 min: 10% B, 2.LC: 0-5 min: 35% B, 5-35 min: 35-50% B, 35-38 min: 50-95% B, 38-40 min: 95% B, 40-40.1 min: 95-35% B, 40.1-60 min: 35% B, Lyciumin B (13 mg) – 1.LC: 0-3 min: 20% B, 3-48 min: 20-40% B, 48-50 min: 40-95% B, 50-54 min: 95% B, 54-55 min: 95-20% B, 55-70 min: 20% B, 2.LC: 0-3 min: 30% B, 3-35 min: 30-45% B, 35-38 min: 45-95% B, 38-40 min: 95% B, 40-40.1 min: 95-30% B, 40.1-60 min: 30% B, Lyciumin C – 1.LC: 0-3 min: 10% B, 3-43 min: 10-50% B, 43-45 min: 50-95% B, 45-48 min: 95% B, 48-49 min: 95-10% B, 49-69 min: 10% B, 2.LC: 0-3 min: 40% B, 3-48 min: 40-55% B, 48-50 min: 55-95% B, 50-54 min: 95% B, 54-55 min: 95-40%, 55-70 min: 40% B, Lyciumin D (5 mg) – 1.LC: 0-3 min: 20% B, 3-48 min: 20-40% B, 48-50 min: 40-95% B, 50-54 min: 95% B, 54-55 min: 95-20% B, 55-70 min: 20% B, 2.LC: 0-3 min: 30% B, 3-48 min: 30-50% B, 48-50 min: 50-95% B, 50-54 min: 95% B, 54-55 min: 95-30% B, 55-70 min: 30% B, Lyciumin I – 1.LC: 0-3 min: 20% B, 3-48min: 20-

50% B, 48-50 min: 50-95% B, 50-54 min: 95% B, 54-55 min: 95-20% B, 55-70min: 20% B, 2.LC: 0-3 min: 25% B, 3-48 min: 25-45% B, 48-50 min: 45-95% B, 50-54 min: 95% B, 54-55 min: 95-25% B, 55-70min: 25% B. Preparative HPLC fractions with lyciumin C and lyciumin I, respectively, were combined, dried *in vacuo*, resuspended in 30% acetonitrile (0.1% trifluoroacetic acid) and subjected to semipreparative HPLC with a Phenomenex Kinetex® 5 µm C18 reverse phase 100 Å 250 x 10 mm LC column as a stationary phase. LC settings were as follows: Solvent A – 0.1% trifluoroacetic acid, solvent B – acetonitrile (0.1% trifluoroacetic acid), 1.5 mL/min, Lyciumin C (25 mg) - 0-5 min: 40% B, 5-15 min: 40-42% B, 15-17 min: 42-95% B, 17-20 min, 95% B, 20-20.1 min: 95-40% B, and lyciumin I (2.5 mg) - 0-5 min: 30% B, 5-30 min: 30-35% B, 30-32 min: 35-95% B, 32-36 min: 95% B, 36-40 min: 95-30% B, 40-60min: 30% B. For NMR analysis, lyciumin A, B, C, D and I were each dissolved in DMSO-d<sub>6</sub>. Lyciumin A was analyzed for <sup>1</sup>H and <sup>13</sup>C NMR data, lyciumin B, D and C were analyzed for <sup>1</sup>H NMR data. Lyciumin I was analyzed for <sup>1</sup>H NMR, <sup>1</sup>H-<sup>1</sup>H COSY, <sup>1</sup>H-<sup>1</sup>H TOCSY, HSQC, HMBC and ROESY data. NMR data was analyzed with TopSpin software (v3.5) from Bruker. Stereochemistry of crosslinked glycine α-carbons at the fourth position of lyciumins was inferred as (*R*) based on lyciumin A analysis (8) and same ROESY correlations of lyciumin I glycine-Hα as reported for lyciumin A (8). Stereochemistry of other amino acids of lyciumin I was inferred as (*L*)-amino acids because of its ribosomal biosynthesis and (*L*)-amino acid stereochemistry in all reported lyciumins (8-10).

### Gene expression analysis of characterized lyciumin precursors

Gene expression of characterized lyciumin precursors was estimated by mapping raw sequencing reads to *de novo* assembled transcriptomes using RSEM (11). For *Solanum tuberosum*, gene expression of lyciumin precursor *PGSC0003DMG400047074* was analyzed in 16 tissue samples (NCBI SRA datasets: ERR029909, ERR029910, ERR029911, ERR029912, ERR029913, ERR029914, ERR029915, ERR029916, ERR029917, ERR029918, ERR029919, ERR029920, ERR029921, ERR029922, ERR029923, ERR029924) (12) by RSEM against the combined *de novo* Trinity (13)-assembled transcriptome of all 16 samples (Figure S24). For *Amaranthus hypochondriacus*, gene expression of lyciumin precursor *AHYPO\_007393-RA* was analyzed in eight tissues and conditions (NCBI SRA: SRR1598916, SRR1598915, SRR1598914, SRR1598913, SRR1598912, SRR1598911, SRR1598910, SRR1598909) by RSEM against the combined *de novo* Trinity-assembled transcriptome of all eight samples (Figure S24). For *Chenopodium quinoa*, gene expression of lyciumin precursor *AUR62017095* was analyzed in 15 tissue samples (NCBI SRA: SRR5974430, SRR5974427, SRR5974436, SRR5974438, SRR5974437, SRR5974435, SRR5974432, SRR5974433, SRR5974425, SRR5974426, SRR5974424, SRR5974431, SRR5974428, SRR5974429, SRR5974434) against the combined *de novo* Trinity-assembled transcriptome of all 15 samples (Figure S24). For *Medicago truncatula*, gene expression of lyciumin precursor *Medtr2g081610* was assessed by the eFP bar.utoronto.ca webbrowser (14) of gene expression data from *Medicago truncatula* RNA-seq dataset (15) and displayed (Figure S24). For *Glycine max*, gene expression of lyciumin precursors *Sali3-2* and *Glyma.12G217300* was assessed by the eFP bar.utoronto.ca webbrowser (14) of gene expression data from *Glycine max* RNA-seq datasets (16,17) and displayed (Figure S24).

### Glutamine cyclotransferase co-expression assays with *LbaLycA* in *Nicotiana benthamiana*

Glutamine cyclotransferase *LbaQC* was characterized as the closest homolog of *Chenopodium quinoa* glutamine cyclotransferase (AUR62017096, Phytozome v12.1) by blastp search of *L. barbarum* root transcriptome on an internal Blast server (18). *LbaQC* was synthesized as a gBlock® (ATGGTTTCTTCTACTTCATATCTACCTACCAATCACACAAAATGCCTCTGCTAAATCCAAGGTTTCTA GTCATAAGCTTGATTGTTCTACTGAGCATCACCGTATTCAGAGAAGCTGAAGCATCATATAGAGTTTAC AAAGTCAAAGTAGTCAATGAATTCCCTCACGACCCCAAGCCTACACTCAGGGGCTTCTCTATGCAGA AAATAATACACTCTTTGAATCAACTGGACTTTACGGACGTTTCATCTGTTTCGAAAAGTTGCATTGCTGGA CGGTAAGGTTGAGAGACTTCATGAAATGGAGTCTTCTTACTTTGGAGAGGGTCTAACTCTTCTTGGTGA GAGGTTGTTCCAACATAACATGGTTGCTGGATACAGGTTTTCATATATGATCGATACAACTTCAGCAAATT CAAAAAGTTTACTCATCACATGCAAGATGGTTGGGGATTGGCAACCGATGGGAAAGTACTTTTTGGAA GTGATGGAACATCAACATTATATAAGATTGACCCTAAAACAATGAAAGTCATCAGAAAACAAGTTGTC AAGTCTCAAGGCATGAAGTGCCTACCTGAATGAGCTGGAGTATGTGAAAGCTGAAGTCTGGGCAA

ATGTTTATGTGACTGATTGCATTGCTAGAAATTCACCAAAAGATGGCACTGTGATCGGGTGGATTCTCC TTCAATCTCTAAGAGAAGAGTTAATATCAAGAGGATATAAGGACTTCGAGGTCCTGAATGGAATCGCA TGGGACAGAGATGGTGACCGTATTTTTGTGACAGGGAACTATGGCCAAAGCTCTTTGAGATCAAGTT GCTCCCCCTCACACCGAATGATCCATTGGCTGGAGAAATCAATAACTTGTGCATCCCGAAAACCAGTT TTCTCTTGGAATTTAG) with a 5'-adapter (tgcccaaatcgcgaccggt) and a 3'-adapter (ctcaggcctttaactctgg) for Gibson assembly (19). pEAQ-HT (20) was digested by AgeI and XhoI restriction enzymes and the *LbaQC* gBlock® was cloned into linearized pEAQ-HT with Gibson Assembly Master Mix (New England Biolabs). pEAQ-HT-*LbaQC* was verified by Sanger sequencing. For glutamine cyclotransferase co-expression assays, pEAQ-HT-*LbaQC* and pEAQ-HT-*LbaLycA* were transformed into *Agrobacterium tumefaciens* LBA4404 for heterologous expression as described above. For co-expression assay, leaves of three plants of *Nicotiana benthamiana* (six week old) were infiltrated with a 1:1 mixture of resuspended *A. tumefaciens* LBA4404 pEAQ-HT-*LbaQC* (OD 0.8) and *A. tumefaciens* LBA4404 pEAQ-HT-*LbaLycA* (OD 0.8). For *LbaLycA* control expression without *LbaQC*, leaves of three plants of *Nicotiana benthamiana* (six week old) were infiltrated with resuspended *A. tumefaciens* LBA4404 pEAQ-HT-*LbaLycA* (OD 0.4). Infiltrated plants were cultivated as described before for six days for heterologous expression. After six days, leaves of three plants of the *LbaQC*-*LbaLycA* co-expression and leaves of three plants of *LbaLycA* expression control were collected and freeze-dried. For comparative chemotyping of [Gln1]-lyciumin B, [Gln1]-lyciumin D, lyciumin B and lyciumin D, peptides were extracted from 0.1 g of freeze-dried tobacco leaves as described above for peptide chemotyping from the *LbaQC*-*LbaLycA* co-expression plants and from the *LbaLycA* expression plants. Peptide extracts were subjected to low resolution MS analysis by selected-ion monitoring (SIM) of masses of [Gln1]-lyciumins and lyciumins with the following LC-MS parameters: LC – Phenomenex Kinetex® 2.6 µm C18 reverse phase 100 Å 150 x 3 mm LC column, LC gradient: solvent A – 0.1% formic acid, solvent B – acetonitrile (0.1% formic acid), 0.5 mL/min, 0-1 min: 5% B, 1-8 min: 5-95% B, 8-10 min: 95% B, 10-15 min: 5% B, MS – positive ion mode, SIM: 896.8-897.8 m/z (lyciumin B), 899.8-900.8 m/z (lyciumin D), 913.8-914.8 m/z ([Gln1]-lyciumin B), 916.8-917.8 m/z ([Gln1]-lyciumin D). Lyciumin and [Gln1]-lyciumin ion abundance values were determined by peak area integration from each peptide SIM chromatogram in QualBrowser in the Thermo Xcalibur software package (version 3.0.63, ThermoScientific).

### **LbaLycA-based lyciumin production in *Nicotiana benthamiana* in comparison to source plant extraction**

*LbaLycA* precursors with one, five or ten core peptide repeats of lyciumin B (QPWGVGSW) were designed manually by combination of different spacer (non-core peptide) sequences from Solanaceae lyciumin precursors with multiple core peptides with lyciumin B core peptide sequences and synthesized as gBlocks® with a 5'-adapter (tgcccaaatcgcgaccggt) and a 3'-adapter (ctcaggcctttaactctgg) for Gibson assembly (19). pEAQ-HT was digested by AgeI and XhoI restriction enzymes and the *LbaLycA* gBlocks® were cloned into linearized pEAQ-HT with Gibson Assembly Master Mix (New England Biolabs). pEAQ-HT-*LycA*-1x/5x/10x-QPWGVGSW were verified by Sanger sequencing. For expression assays, pEAQ-HT-*LycA*-1x-QPWGVGSW, pEAQ-HT-*LycA*-5x-QPWGVGSW or pEAQ-HT-*LycA*-10x-QPWGVGSW were transformed into *Agrobacterium tumefaciens* LBA4404 for heterologous expression as described above. Multiple leaves of three plants of *Nicotiana benthamiana* (six week old) were infiltrated with resuspended *A. tumefaciens* LBA4404 pEAQ-HT-*LycA*-1x-QPWGVGSW, pEAQ-HT-*LycA*-5x-QPWGVGSW or pEAQ-HT-*LycA*-10x-QPWGVGSW (OD 0.8). Infiltrated plants were cultivated as described before for six days for heterologous expression. After six days, infiltrated leaves of the three plants were collected and freeze-dried. For source plant extraction, roots of three *Lycium barbarum* plants (one year old) were collected and freeze-dried. For comparative lyciumin B chemotyping, 0.1 g of freeze-dried leaves of each *N. benthamiana* plant and 0.1 g of freeze-dried roots were extracted as described above. Peptide extracts were subjected to low resolution MS analysis by selected-ion monitoring (SIM) of lyciumin B with the following LC-MS parameters: LC – Phenomenex Kinetex® 2.6 µm C18 reverse phase 100 Å 150 x 3 mm LC column, LC gradient: solvent A – 0.1% formic acid, solvent B – acetonitrile (0.1% formic acid), 0.5 mL/min, 0-1 min: 5% B, 1-8 min: 5-95% B, 8-10 min: 95% B, 10-15 min: 5% B, MS – positive ion mode, SIM: 896.8-897.8 m/z (lyciumin B). Lyciumin B ion abundance values were determined by peak area integration from each peptide SIM chromatogram in QualBrowser in the Thermo Xcalibur software package (version 3.0.63, ThermoScientific).



>LycA-1x-QPWGVGSW  
ATGGAGTTGCATCACCATTACTTCTTCATACTTCTTTCTCTTGTCTTTATAGCAAGTCATGCAGCTAATTTATCTCCTGAGGTGTATTGGAAAGTCAAGCTGCCAACACT  
CCTATGCCAGACCCATTAAAGGATGCTCTACACTATTCTGAAGCCTCCGAGGGTGACGTTTCAACAAGTTGCGCCAACCATGGGGAGTGGGTTCTGGTATAACTGCTTACA  
AAGAAAGATGTTAATGAAACCTCCAGTCCACCCCTACTTTTGTAAACAGATTTACATCAAGGAAAAAGATGAATCTTCCATCTCAAAAAATTATAATCCAGCTCCC  
ATTTTGCCTCGCAAAGTTGCAGATTCCATCCCTTCTCATCAGACAAGATTGAAGAAATTTCAAAGCACTTTTCCATTGATAAGGACTCAGAGGGGGTAAAAATGATCAAG  
AAAACATATAAAGATGTGTGAGGAGCAAGCGGTAATGGCCGAGAAGAAATATTGTGCCACTTCTTGAATCAATGGTTGATTTACCTCATCTTATCTGGGAACAAATAAT  
ATTATAGCACTTCCACTTTAGTAGAGAAGGAACTCCAGAGTGCAAAATATATACCATCGAAGAAGTGAAGAGAAAGCAAAATGGCAAAGCGGTGATATGCCAAAGTG  
GCTTACCCGATGCGATACATTATTGCCATAGTGTAGGAAGCACAAGGACCTTTATGGTCTCAATGGTGGGTTCTGATGGAACAAAAGTTAATGCAGTATCAGAGTGTCTAT  
GAGGATACGACCCATGAACCTAAGGCATTGCCTTTTCAATTGCTCAACGTTAAGCCAGGAGATAAACCTATTGTGCCATTTTCAATTTGGATGATCAGATTGCCTTAGTT  
CCTTCTCAAGACGCAACTCAAGTGTCTGAAAACTAA

>LycA-5x-QPWGVGSW  
ATGGAGTTGCATCACCATTACTTCTTCATACTTCTTTCTCTTGTCTTTATAGCAAGTCATGCAGCTAATTTATCTCCTGAGGTGTATTGGAAAGTCAAGCTGCCAACACT  
CCTATGCCAGACCCATTAAAGGATGCTCTACACTATTCTGAAGCCTCCGAGGGTGACGTTTCAACAAGTTGCGCCAACCATGGGGAGTGGGTTCTGGTATAAGCAGCAAAAC  
GAGGTTGATGTTAAAAAATTAGCCAGCCTTGGGGTGTGGGCTCTTGGTATAAGGCTGCCCCAGAGGACGAGCTTCAAAAAATAGCCAGCCCTGGGGCGTGGGATCCTGG  
TATCAAGCTGCCAAAGAGAAATGACCTACCAGAATGCCAGCCTGGGGGTAGGGAGTTGGTATCAGGCTGCCCCGAGAACGAGCTTCAAAAGTACGGCAGCCATGG  
GGCGTGGAAAGTGTACCAACCCGAGCAGAAAGGGGATTTACACAAGCTCCGATATAAATCTGCTACAAAGAAAGATGTTAATGAAACCTCCAGTCCACCCCTACTTT  
TTTGAACAGATTTACATCAAGGAAAAAGATGAATCTTCCATCTCTCAAAAATATAATCCAGCTCCCATTTTGCCTCGCAAAGTTGCAGATTCCATCCCTTCTCATCA  
GACAAGATTGAAGAAATTTCAAGCACTTTTCCATTGATAAGGACTCAGAGGGGGTAAAAATGATCAAGAAACTATAAATGTTGTAGGAGCAAGCGGTAATGGCGAG  
AAGAAATATTGTGCCACTTCTTAGAATCAATGGTTGATTTACCTCATCTTATCTGGGAACAAAATAATATTATAGCACTTCCACTTTAGTAGAGAAGGAACTCCAGAG  
GTGCAAAATATATACCATCGAAGAAGTGAAGAGAAAGCAAAATGGCAAAGCGGTGATATGCCCAAAGTGGTTACCCGATGCGATACATTATTGCCATAGTGTAGGAAGC  
ACAAGGACCTTTATGGTCTCAATGGTGGGTTCTGATGGAACAAAAGTTAATGCAGTATCAGAGTGTCTGATGAGGATACTGCACCCATGAACCTAAGGCATTGCCCTTTCAA  
TTGCTCAACGTTAAGCCAGGAGATAAACCTATTGTGCCATTTTCAATTTGGATGATCAGATTGCCTTAGTTCTTCTCAAGACGCAACTCAAGTGTCTGAAAACTAA

>LycA-10x-QPWGVGSW  
ATGGAGTTGCATCACCATTACTTCTTCATACTTCTTTCTCTTGTCTTTATAGCAAGTCATGCAGCTAATTTATCTCCTGAGGTGTATTGGAAAGTCAAGCTGCCAACACT  
CCTATGCCAGACCCATTAAAGGATGCTCTACACTATTCTGAAGCCTCCGAGGGTGACGTTTCAACAAGTTGCGCCAACCATGGGGAGTGGGTTCTGGTATAAGCAGCAAAAC  
GAGGTTGATGTTAAAAAATTAGCCAGCCTTGGGGTGTGGGCTCTTGGTATAAGGCTGCCCCAGAGGACGAGCTTCAAAAAATAGCCCAACCCCTGGGGCGTGGGATCCTGG  
TATCAAGCTGCCAAAGAGAAATGACCTACCAGAATGCCAGCCTGGGGGTAGGGAGTTGGTATCAGGCTGCCCCGAGAACGAGCTTCAAAAGTACGGCAACCATGG  
GGCGTGGAAAGTGTACCAACCCGAGCAGAAAGGGGATTTACACAAGCTCCGACAGCCTTGGGGCGTGGGGAGTTGGTACAAACGACGACCCAGAGAATGAATCCATAAG  
TTCCGTTCAACCTGGGGAGTTGGATCGTGGTACAGGGCAGCTACTGAAGGGGACGTTCAAAAAGCTGCGTCAAGCCGTTGGGGCTCGGCTCATGGTACCAAGCAGCAAAACGAG  
GGAGACATTAAGAAGCTACGGCAGCCATGGGGAGTCCGCTCTTGGTACAGAGCCGCTACTGAGGGTGACGTTTCAAGAAGTAAAGACGACCCCTGGGGGTGGTGTGGTAT  
AATACTGCTACAAAGAAAGATGTTAATGAAACCTCCAGTCCACCCCTACTTTTGTAAACAGATTTACATCAAGGAAAAAGATGAATCTTCCATCTCTCAAAAATTTAT  
AATCCAGCTCCCATTTTGCCTCGCAAAGTTGCAGATTCCATCCCTTCTCATCAGACAAGATTGAAGAAATTTCAAAGCACTTTTCCATTGATAAGGACTCAGAGGGGCT  
AAAATGATCAAGAAACTATCAAAATGTGTGAGGAGCAAGCGGTAATGGCGAGAAGAAATATTGTGCCACTTCTTAGAATCAATGGTTGATTTACCTCATCTTATCTG  
GGAAACAAAATAATATTATAGCACTTCCACTTTAGTAGAGAAGGAACTCCAGAGTGCAAAATATATACCATCGAAGAAGTGAAGAGAAAGCAAAATGGCAAAGCGGTGATA  
TGCCACAAAGTGGCTTACCCGATGCGATACATTATTGCCATAGTGTAGGAAGCACAAGGACCTTTATGGTCTCAATGGTGGGTTCTGATGGAACAAAAGTTAATGCAGTA  
TCAGAGTGTATGAGGATACTGCACCCATGAACCTAAGGCATTGCCTTTTCAATTTGCTCAACGTTAAGCCAGGAGATAAACCTATTGTGCCATTTTCAATTTGGATGATCAG  
ATTGCTTAGTTCTTCTCAAGACGCAACTCAAGTGTCTGAAAACTAA

**LbaLycA-based lyciumin precursors with 1, 5 or 10 core peptides of lyciumin B (BURP domain underlined, core peptides in red):**

>LycA-1x-QPWGVGSW  
MELHHHYFFILLSLAFIASHAANLSPEVYKVKLPNTMPRPRIKDALHYSEASEGDVHKLRL**QPWGVGSW**YNTATKKDVNENLVPVTPYFFETD  
LHQGKMNLP**SLK**NYNPAPILPRKVADSI**PFSSDKIEEILKHFS**IDKDSEGA**KMIKKT**IKMCEE**QAGN**GEKKYCAT**SL**ESMVDFTSSYLG**TN**  
NIIALSTLVEKETPEVQIY**Y**TIIEVKEKANGKGV**ICH**KVAYPYAIHYCHSVG**STR**TFMVSMVGS**DG**TKVNAVSECH**ED**TAPMNP**KALP**  
FQ**LLN**VKPGDK**PI**CH**FILDDQ**IALVPSQ**DATQ**VSEN

>LycA-5x-QPWGVGSW  
MELHHHYFFILLSLAFIASHAANLSPEVYKVKLPNTMPRPRIKDALHYSEASEGDVHKLRL**QPWGVGSW**YQAANEGDVK**KLRLQPWGVGSW**YK  
AAPEDELHKIR**QPWGVGSW**YQAANENLPRMS**QPWGVGSW**YQAAPENELHKV**RPQPWGVGSW**YQAAEGDLHLK**RLYNTATKKDVNENLVPVTPY**  
FFETDLHQG**KMNLP****SLK**NYNPAPILPRKVADSI**PFSSDKIEEILKHFS**IDKDSEGA**KMIKKT**IKMCEE**QAGN**GEKKYCAT**SL**ESMVDFTSS  
YLG**TN**NI**I**ALSTLVEKETPEVQIY**Y**TIIEVKEKANGKGV**ICH**KVAYPYAIHYCHSVG**STR**TFMVSMVGS**DG**TKVNAVSECH**ED**TAPMNP**KALP**  
FQ**LLN**VKPGDK**PI**CH**FILDDQ**IALVPSQ**DATQ**VSEN

>LycA-10x-QPWGVGSW  
MELHHHYFFILLSLAFIASHAANLSPEVYKVKLPNTMPRPRIKDALHYSEASEGDVHKLRL**QPWGVGSW**YQAANEGDVK**KLRLQPWGVGSW**YK  
AAPEDELHKIR**QPWGVGSW**YQAANENLPRMS**QPWGVGSW**YQAAPENELHKV**RPQPWGVGSW**YQAAEGDLHLK**RLQPWGVGSW**YNDAPENELH  
KFR**QPWGVGSW**YRAATEGDVQ**KLRLQPWGVGSW**YQAANEGDI**KKLRLQPWGVGSW**YRAATEGDVQ**KLRLQPWGVGSW**YNTATKKDVNENLVPVTPY  
FFETDLHQG**KMNLP****SLK**NYNPAPILPRKVADSI**PFSSDKIEEILKHFS**IDKDSEGA**KMIKKT**IKMCEE**QAGN**GEKKYCAT**SL**ESMVDFTSS  
YLG**TN**NI**I**ALSTLVEKETPEVQIY**Y**TIIEVKEKANGKGV**ICH**KVAYPYAIHYCHSVG**STR**TFMVSMVGS**DG**TKVNAVSECH**ED**TAPMNP**KALP**  
FQ**LLN**VKPGDK**PI**CH**FILDDQ**IALVPSQ**DATQ**VSEN

**Table S1 | NMR analysis of lyciumin A from *Lycium barbarum* (600 MHz, DMSO-d6).**

| Residue              | C          | $\delta(^{13}\text{C})$<br>[ppm] <sup>[a]</sup> | $\delta(^{13}\text{C})$<br>[ppm] <sup>[b]</sup> | H          | $\delta(^1\text{H})$ (int, m, <i>J</i> )<br>[ppm] <sup>[c]</sup> | $\delta(^1\text{H})$ (int, m, <i>J</i> )<br>[ppm] <sup>[d]</sup> |
|----------------------|------------|-------------------------------------------------|-------------------------------------------------|------------|------------------------------------------------------------------|------------------------------------------------------------------|
| PyroGlu <sup>1</sup> | $\alpha$   | 54.8                                            | 54.6                                            | $\alpha$   | 4.35 (1H, m)                                                     | 4.35 (m)                                                         |
|                      | $\beta$    | 23.9                                            | 23.9                                            | $\beta_1$  | 2.28 (1H, m)/1.89 (m)                                            | 2.29 (m)/1.9 (m)                                                 |
|                      | $\gamma$   | 26.5                                            | 27.3                                            | $\gamma$   | 2.10 (m)                                                         | 2.10 (2H, m)                                                     |
|                      | $\delta$   | 177.4                                           | 177.3                                           | NH         | 7.9 (m)                                                          | n/a                                                              |
| Pro <sup>2</sup>     | $\alpha$   | 59.5                                            | 59.4                                            | $\alpha$   | 4.35 (1H, m)                                                     | 4.35 (m)                                                         |
|                      | $\beta$    | 29.1                                            | 29.0                                            | $\beta$    | 2.11 (m)/1.75 (m)                                                | 2.16 (m)/1.75 (m)                                                |
|                      | $\gamma$   | 24.4                                            | 24.2                                            | $\gamma$   | 1.81 (m)/1.69 (m)                                                | 1.82 (m)/ 1.68 (m)                                               |
|                      | $\delta$   | 46.2                                            | 46.1                                            | $\delta$   | 3.63 (m)/3.36 (m)                                                | 3.60 (m)/3.35 (m)                                                |
| Tyr <sup>3</sup>     | $\alpha$   | 53.9                                            | 53.8                                            | $\alpha$   | 4.33 (1H, m)                                                     | 4.33 (t, 7)                                                      |
|                      | $\beta$    | 36.3                                            | 36.3                                            | $\beta$    | 2.63 (2H, m)                                                     | 2.63 (2H, d, 7)                                                  |
|                      | C1         | 126.6                                           | 126.5                                           | H2         | 6.68 (1H, d, 8.4)                                                | 6.63 (1H, d, 8)                                                  |
|                      | C2         | 129.9                                           | 129.8                                           | H3         | 6.35 (1H, d, 8.3)                                                | 6.38 (1H, d, 8)                                                  |
|                      | C3         | 114.8                                           | 114.9                                           | OH         | 7.73 (1H, s)                                                     | 7.71 (s, OH)                                                     |
|                      | C4         | 155.8                                           | 155.6                                           | H5         | 6.35 (1H, d, 8.3)                                                | 6.38 (1H, d, 8)                                                  |
|                      | C5         | 114.8                                           | 114.9                                           | H6         | 6.68 (1H, d, 8.4)                                                | 6.63 (1H, d, 8)                                                  |
|                      | C6         | 129.9                                           | 129.8                                           | NH         | 7.94 (m)                                                         | 7.97 (br d, 7)                                                   |
| Gly <sup>4</sup>     | $\alpha$   | 61.0                                            | 61.4                                            | $\alpha$   | 6.66 (1H, d, 8.4)                                                | 6.67 (d, 8)                                                      |
|                      |            |                                                 |                                                 | NH         | 9.28 (1H, d, 8.4)                                                | 9.37 (d, 8)                                                      |
| Val <sup>5</sup>     | $\alpha$   | 51.7                                            | 56.3                                            | $\alpha$   | 4.00 (1H, t, 8.1)                                                | 3.99 (t, 7)                                                      |
|                      | $\beta$    | 28.9                                            | 29.0                                            | $\beta$    | 2.05 (m)                                                         | 2.03 (m)                                                         |
|                      | $\gamma_1$ | 19.6                                            | 19.2                                            | $\gamma_1$ | 0.91 (3H, d, 6.7)                                                | 0.87 (3H, d, 7)                                                  |
|                      | $\gamma_2$ | 18.9                                            | 18.5                                            | $\gamma_2$ | 0.86 (3H, d, 6.8)                                                | 0.82 (3H, d, 7)                                                  |
| Gly <sup>6</sup>     | $\alpha$   | 43.1                                            | 43.5                                            | $\alpha$   | 4.02 (1H, m)/<br>3.22 (1H, m)                                    | 4.08 (dd, 6, 15)/ 3.23<br>(dd, 6, 15)                            |
|                      |            |                                                 |                                                 | NH         | 8.53 (1H, t, 6)                                                  | 8.68 (t, 6)                                                      |
| Ser <sup>7</sup>     | $\alpha$   | 55.2                                            | 55.4                                            | $\alpha$   | 4.22 (1H, dd, 6, 13)                                             | 4.11 (dd, 7, 11)                                                 |
|                      | $\beta$    | 61.7                                            | 62.0                                            | $\beta$    | 3.59 (m)/3.4 (m)                                                 | 3.59 (m)/3.49 (m)                                                |
| Trp <sup>8</sup>     |            |                                                 |                                                 | NH         | 7.90 (m)                                                         | 7.72 (br d, 7)                                                   |
|                      | $\alpha$   | 53.9                                            | 53.8                                            | $\alpha$   | 4.54 (1H, t)                                                     | 4.40 (t, 7)                                                      |
|                      | $\beta$    | 28.6                                            | 28.3                                            | $\beta$    | 3.30 (m)/3.16 (m)                                                | 3.30 (m)/ 3.01 (m)                                               |
|                      | C2         | 123.8                                           | 124.7                                           | H2         | 7.15 (s)                                                         | 6.91 (s)                                                         |
|                      | C3         | 113.2                                           | 111.2                                           | H4         | 7.53 (1H, d, 8.1)                                                | 7.54 (d, 8)                                                      |
|                      | C4         | 119.1                                           | 119.5                                           | H5         | 7.08 (1H, t, 7.5)                                                | 7.04 (t, 8)                                                      |
|                      | C5         | 121.3                                           | 121.9                                           | H6         | 7.18 (1H, t, 7.7)                                                | 7.14 (t, 8)                                                      |
|                      | C6         | 119.1                                           | 118.7                                           | H7         | 7.37 (1H, d, 8.4)                                                | 7.38 (d, 8)                                                      |
| C7                   | 109.4      | 109.8                                           | NH                                              | 7.9 (m)    | 7.83 (d, 7)                                                      |                                                                  |
| C=O                  |            | 166.4                                           | 166.5                                           |            |                                                                  |                                                                  |
|                      |            | 169.4                                           | 169.2                                           |            |                                                                  |                                                                  |
|                      |            | 169.9                                           | 169.2                                           |            |                                                                  |                                                                  |
|                      |            | 170.6                                           | 170.6                                           |            |                                                                  |                                                                  |
|                      |            | 171.5                                           | 171.3                                           |            |                                                                  |                                                                  |
|                      |            | 171.5                                           | 171.3                                           |            |                                                                  |                                                                  |
|                      |            | 171.6                                           | 171.5                                           |            |                                                                  |                                                                  |
|                      | 173.0      | 175.7                                           |                                                 |            |                                                                  |                                                                  |

[a] <sup>13</sup>C NMR data of isolated lyciumin A in DMSO-d6. Values were derived from <sup>13</sup>C NMR analysis (Figure S3) [b] <sup>13</sup>C NMR data of lyciumin A in DMSO-d6 from reference 9. [c] <sup>1</sup>H NMR data of isolated lyciumin A in DMSO-d6. Multiplicity m (s=singlet, d=doublet, t=triplet, dd=double doublet, m=multiplet), intensity int, coupling constants *J* in Hertz (Figure S2). [d] <sup>1</sup>H NMR data of lyciumin A in DMSO-d6 from reference 9.

Table S2 | NMR analysis of lyciumin B from *Lycium barbarum* (600 MHz, DMSO-d6).

| Residue              | H          | $\delta(^1\text{H})$ (int, m, $J$ )<br>[ppm] <sup>[a]</sup> | $\delta(^1\text{H})$ (int, m, $J$ )<br>[ppm] <sup>[b]</sup> |
|----------------------|------------|-------------------------------------------------------------|-------------------------------------------------------------|
| PyroGlu <sup>1</sup> | $\alpha$   | 4.45 (1H, dd, 7, 13)                                        | 4.36 (m)                                                    |
|                      | $\beta$    | 2.23 (1H, m)/1.83 (1H, m)                                   | 2.21 (m)/1.83 (m)                                           |
|                      | $\gamma$   | 2.08 (2H, m)                                                | 2.08 (2H, m)                                                |
|                      | NH         | 7.89 (1H)                                                   | n/a                                                         |
| Pro <sup>2</sup>     | $\alpha$   | 4.34 (1H, m)                                                | 4.36 (m)                                                    |
|                      | $\beta$    | 2.10 (m)/1.97 (m)                                           | 2.10 (m)/1.95 (m)                                           |
|                      | $\gamma$   | 1.72 (2H, m)                                                | 1.72 (2H, m)                                                |
|                      | $\delta$   | 3.63 (m)/3.33 (m)                                           | 3.64 (dd, 5, 11)/3.11 (dd, 9, 11)                           |
| Trp <sup>3</sup>     | $\alpha$   | 4.34 (1H, m)                                                | 4.32 (m)                                                    |
|                      | $\beta$    | 3.31 (m)/2.9 (1H, m)                                        | 3.26 (m)/2.93 (m)                                           |
|                      | H2         | 6.86 (s)                                                    | 6.87 (s)                                                    |
|                      | H4         | 7.53 (1H, d, 7.7)                                           | 7.56 (d, 8)                                                 |
|                      | H5         | 7.06 (1H, t, 7.5)                                           | 7.01 (t, 8)                                                 |
|                      | H6         | 7.14 (1H, t, 7.8)                                           | 7.08 (t, 8)                                                 |
|                      | H7         | 7.28 (1H, t, 8)                                             | 7.28 (t, 8)                                                 |
|                      | N(indole)H | 10.68 (1H, s)                                               | 10.66 (s)                                                   |
|                      | NH         | 7.93 (1H, d, 7.6)                                           | 7.86 (d, 6)                                                 |
| Gly <sup>4</sup>     | $\alpha$   | 6.61 (d, 8.2)                                               | 6.67 (d, 8)                                                 |
|                      | NH         | 9.30 (d, 8.1)                                               | 9.35 (d, 8)                                                 |
| Val <sup>5</sup>     | $\alpha$   | 4.01 (m)                                                    | 4.01 (t, 7)                                                 |
|                      | $\beta$    | 2.08 (m)                                                    | 2.08 (m)                                                    |
|                      | $\gamma$ 1 | 0.90 (3H, d, 6.7)                                           | 0.87 (3H, d, 7)                                             |
|                      | $\gamma$ 2 | 0.86 (3H, d, 6.8)                                           | 0.82 (3H, d, 7)                                             |
|                      | NH         | 7.97 (1H, d, 6.3)                                           | 7.89 (br d, 7)                                              |
| Gly <sup>6</sup>     | $\alpha$   | 4.04 (m)/3.26 (1H, m)                                       | 4.08 (dd, 6, 15)/3.25 (m)                                   |
|                      | NH         | 8.56 (1H, t, 6)                                             | 8.55 (br s)                                                 |
| Ser <sup>7</sup>     | $\alpha$   | 4.22 (1H, dd, 6.1, 12.7)                                    | 4.18 (dd, 6, 12)                                            |
|                      | $\beta$    | 3.55 (m)/3.36 (m)                                           | 3.55 (m)/3.30 (m)                                           |
|                      | NH         | 7.93 (1H, d, 8)                                             | 7.69 (br d, 7)                                              |
| Trp <sup>8</sup>     | $\alpha$   | 4.53 (1H, dt, 3.3, 8.1)                                     | 4.52 (m)                                                    |
|                      | $\beta$    | 3.16 (1H, br s)/2.9 (1H, m)                                 | 3.26 (m)/2.93 (br s)                                        |
|                      | H2         | 7.17 (s)                                                    | 7.55 (s)                                                    |
|                      | H4         | 7.37 (d, 7.7)                                               | 7.37 (d, 8)                                                 |
|                      | H5         | 6.86 (1H, t)                                                | 6.86 (t, 8)                                                 |
|                      | H6         | 7.00 (1H, t, 7.6)                                           | 7.00 (t, 8)                                                 |
|                      | H7         | 7.26 (1H, d, 8)                                             | 7.26 (d, 8)                                                 |
|                      | NH         | 7.71 (s)                                                    | 7.69 (br d, 7)                                              |

[a] <sup>1</sup>H NMR data of isolated lyciumin B in DMSO-d6. Multiplicity m (s=singlet, d=doublet, t=triplet, dd=double doublet, m=multiplet), intensity int, coupling constants  $J$  in Hertz (Figure S5). [b] <sup>1</sup>H NMR data of lyciumin B in DMSO-d6 from reference 9.

Table S3 | NMR analysis of lyciumin D from *Lycium barbarum* (600 MHz, DMSO-d6).

| Residue              | H             | $\delta(^1\text{H})$ (int, m, $J$ )<br>[ppm] <sup>[a]</sup> | $\delta(^1\text{H})$ (int, m, $J$ )<br>[ppm] <sup>[b]</sup> |
|----------------------|---------------|-------------------------------------------------------------|-------------------------------------------------------------|
| PyroGlu <sup>1</sup> | $\alpha$      | 4.50 (1H, m)                                                | 4.36 (m)                                                    |
|                      | $\beta$       | 2.27 (m)/1.88 (m)                                           | 2.31 (m)/1.85 (m)                                           |
|                      | $\gamma$      | 2.10 (2H, m)                                                | 2.10 (2H, m)                                                |
|                      | NH            | 8.32 (1H, d, 7.5)                                           | n/a                                                         |
| Pro <sup>2</sup>     | $\alpha$      | 4.34 (1H, m)                                                | 4.36 (m)                                                    |
|                      | $\beta$       | 2.00 (1H, m)/1.80 (m)                                       | 1.97 (m)/1.80 (m)                                           |
|                      | $\gamma$      | 1.83 (2H, m)                                                | 1.83 (2H, m)                                                |
|                      | $\delta$      | 3.57 (m)                                                    | 3.58 (m)/3.41 (m)                                           |
| Tyr <sup>3</sup>     | $\alpha$      | 4.34 (1H, m)                                                | 4.33 (m)                                                    |
|                      | $\beta$       | 2.62 (2H, m)                                                | 2.64 (m)                                                    |
|                      | H2            | 6.66 (1H, d, 8.4)                                           | 6.52 (1H, d, 8)                                             |
|                      | H3            | 6.33 (1H, d, 8.4)                                           | 6.35 (1H, d, 8)                                             |
|                      | OH            | 9.05 (s)                                                    | 7.53 (s)                                                    |
|                      | H5            | 6.33 (1H, d, 8.4)                                           | 6.35 (1H, d, 8)                                             |
|                      | H6            | 6.66 (1H, d, 8.4)                                           | 6.52 (1H, d, 8)                                             |
|                      | NH            | 7.90 (1H, d, 7.9)                                           | 7.85 (d, 5)                                                 |
| Gly <sup>4</sup>     | $\alpha$      | 6.65 (d, 8.5)                                               | 6.67 (d, 9)                                                 |
|                      | NH            | 9.38 (1H, d, 8.5)                                           | 9.15 (d, 9)                                                 |
| Val <sup>5</sup>     | $\alpha$      | 4.01 (m)                                                    | 4.04 (m)                                                    |
|                      | $\beta$       | 2.01 (m)                                                    | 2.10 (m)                                                    |
|                      | $\gamma_1$    | 0.87 (3H, d, 7)                                             | 0.86 (3H, d, 6)                                             |
|                      | $\gamma_2$    | 0.85 (3H, d, 7)                                             | 0.84 (3H, d, 6)                                             |
|                      | NH            | 7.73 (1H, m)                                                | 7.70 (d, 8)                                                 |
| Gly <sup>6</sup>     | $\alpha$      | 4.00 (m)/3.30 (m)                                           | 4.01 (m)/3.29 (m)                                           |
|                      | NH            | 8.39 (1H, t, 6)                                             | 8.30 (t, 5)                                                 |
| Ile <sup>7</sup>     | $\alpha$      | 4.12 (1H, dd)                                               | 4.07 (m)                                                    |
|                      | $\beta$       | 1.76 (m)                                                    | 1.77 (m)                                                    |
|                      | $\gamma_1$    | 1.48 (1H, m)                                                | 1.49 (m)                                                    |
|                      | $\gamma_2$    | 1.09 (1H, m)                                                | 1.14 (m)                                                    |
|                      | $\gamma$ (Me) | 0.86 (3H, d, 6.6)                                           | 0.83 (3H, d, 8)                                             |
|                      | $\delta$      | 0.81 (3H, t, 7.5)                                           | 0.82 (3H, t, 8)                                             |
|                      | NH            | 7.39 (1H, d, 8.4)                                           | 7.47 (d, 7)                                                 |
| Trp <sup>8</sup>     | $\alpha$      | 4.28 (1H, dd, 6.6, 12.8)                                    | 4.38 (m)                                                    |
|                      | $\beta$       | 3.20 (m)/3.12 (m)                                           | 3.20 (m)/3.00 (m)                                           |
|                      | H2            | 6.56 (s)                                                    | 6.84 (s)                                                    |
|                      | H4            | 7.54 (1H, d, 7.7)                                           | 7.54 (d, 8)                                                 |
|                      | H5            | 7.05 (1H)                                                   | 7.01 (t, 8)                                                 |
|                      | H6            | 7.09 (1H, t, 7.5)                                           | 7.11 (t, 8)                                                 |
|                      | H7            | 7.18 (1H, t, 8.4)                                           | 7.39 (t, 8)                                                 |
|                      | NH            | 7.72 (1H, s)                                                | 7.56 (d, 6)                                                 |

[a] <sup>1</sup>H NMR data of isolated lyciumin D in DMSO-d6. Multiplicity m (s=singlet, d=doublet, t=triplet, dd=double doublet, m=multiplet), intensity int, coupling constants  $J$  in Hertz (Figure S7). [b] <sup>1</sup>H NMR data of lyciumin D in DMSO-d6 from reference 9.



**Table S5 | Core peptide sequences from predicted lyciumin precursor genes.**

| Core peptide | Chemotype  | Organism(s)                                                                                                                                        |
|--------------|------------|----------------------------------------------------------------------------------------------------------------------------------------------------|
| QPYTVGSW*    | Lyciumin A | <i>Amaranthus hypochondriacus</i>                                                                                                                  |
| QPYTVFSW*    | Lyciumin C | <i>Amaranthus hypochondriacus</i>                                                                                                                  |
| QPYGVYTW*    | Lyciumin I | <i>Arachis duranensis, Arachis ipaensis, Glycine max, Medicago truncatula, Solanum melongena, Trifolium pratense</i>                               |
| QPWTVYVGW    |            | <i>Beta vulgaris</i>                                                                                                                               |
| QPWTVAGW     |            | <i>Beta vulgaris</i>                                                                                                                               |
| QPFTISAW     |            | <i>Beta vulgaris</i>                                                                                                                               |
| QPWTVAAW*    | Lyciumin E | <i>Beta vulgaris</i>                                                                                                                               |
| QPYGGLTW     |            | <i>Capsicum annuum</i>                                                                                                                             |
| QPWGVCLW     |            | <i>Capsicum annuum</i>                                                                                                                             |
| QPWGVGSW*    | Lyciumin B | <i>Capsicum annuum, Capsicum chinense, Solanum lycopersicum, Solanum melongena, Solanum pennellii, Solanum pimpinellifolium, Solanum tuberosum</i> |
| QPWGVGFW     |            | <i>Capsicum annuum, Capsicum chinense</i>                                                                                                          |
| QPWGVCFW     |            | <i>Capsicum chinense</i>                                                                                                                           |
| QPFTVVGW*    | Lyciumin G | <i>Chenopodium quinoa</i>                                                                                                                          |
| QPYTVMAW     |            | <i>Chenopodium quinoa</i>                                                                                                                          |
| QPYTVWGW*    | Lyciumin F | <i>Chenopodium quinoa</i>                                                                                                                          |
| QPYTVMGW     |            | <i>Chenopodium quinoa</i>                                                                                                                          |
| QPYTVYGW     |            | <i>Chenopodium quinoa</i>                                                                                                                          |
| QPFTVFGW     |            | <i>Chenopodium quinoa</i>                                                                                                                          |
| QPYTVDGW     |            | <i>Chenopodium quinoa</i>                                                                                                                          |
| QPFTVFAW     |            | <i>Glycine max</i>                                                                                                                                 |
| QPWGVGTW*    | Lyciumin H | <i>Glycine max</i>                                                                                                                                 |
| QPLLFIYW     |            | <i>Medicago truncatula</i>                                                                                                                         |
| QPYGVYFW     |            | <i>Medicago truncatula</i>                                                                                                                         |
| QPLTTRMW     |            | <i>Medicago truncatula</i>                                                                                                                         |
| QPLTSMW      |            | <i>Medicago truncatula</i>                                                                                                                         |
| QPITTHMW     |            | <i>Medicago truncatula</i>                                                                                                                         |
| QPFGINIW     |            | <i>Medicago truncatula, Trifolium pratense</i>                                                                                                     |
| QPFVLTW      |            | <i>Medicago truncatula</i>                                                                                                                         |
| QPFGFESW     |            | <i>Medicago truncatula</i>                                                                                                                         |
| QPLPAHKW     |            | <i>Medicago truncatula</i>                                                                                                                         |
| QPFRTIGW     |            | <i>Medicago truncatula</i>                                                                                                                         |
| QPLGAVKW     |            | <i>Medicago truncatula</i>                                                                                                                         |
| QPFGLTW      |            | <i>Medicago truncatula</i>                                                                                                                         |
| QPFGVAW      |            | <i>Medicago truncatula</i>                                                                                                                         |
| QPFGFRAW     |            | <i>Medicago truncatula</i>                                                                                                                         |
| QPFEAHTW     |            | <i>Medicago truncatula</i>                                                                                                                         |
| QPWGVYSW     |            | <i>Nicotiana attenuata</i>                                                                                                                         |
| QPYGVFAW*    | Lyciumin J | <i>Petunia axillaris, Solanum tuberosum</i>                                                                                                        |
| QPFGVFAW     |            | <i>Petunia axillaris</i>                                                                                                                           |
| QPYGPFGW     |            | <i>Petunia inflata</i>                                                                                                                             |
| QPFGDYVW     |            | <i>Petunia inflata</i>                                                                                                                             |
| QPYGVFGW     |            | <i>Petunia inflata, Solanum tuberosum</i>                                                                                                          |
| QPFGVFGW     |            | <i>Petunia inflata, Solanum tuberosum</i>                                                                                                          |
| QPFGVFEW     |            | <i>Petunia inflata</i>                                                                                                                             |
| QPAPQLYW     |            | <i>Prunus avium, Prunus persica</i>                                                                                                                |
| QPARQLYW     |            | <i>Prunus persica</i>                                                                                                                              |
| QPWGVGAW*    | Lyciumin K | <i>Solanum lycopersicum, Solanum pennellii, Solanum pimpinellifolium, Solanum tuberosum</i>                                                        |
| QPWGVYRW     |            | <i>Solanum lycopersicum</i>                                                                                                                        |
| QPYGVYRW*    | Lyciumin M | <i>Solanum lycopersicum, Solanum pimpinellifolium, Solanum tuberosum</i>                                                                           |
| QPYGVYSW     |            | <i>Solanum lycopersicum, Solanum pimpinellifolium</i>                                                                                              |
| QPWGVNSW     |            | <i>Solanum melongena</i>                                                                                                                           |
| QPWGVLRW     |            | <i>Solanum melongena</i>                                                                                                                           |
| QPWGVLGW     |            | <i>Solanum melongena</i>                                                                                                                           |
| QPFVYRW      |            | <i>Solanum pennellii</i>                                                                                                                           |
| QPWGVFERW    |            | <i>Solanum pennellii</i>                                                                                                                           |
| QPYGVYSW     |            | <i>Solanum pimpinellifolium</i>                                                                                                                    |
| QPWGVDSW     |            | <i>Solanum tuberosum</i>                                                                                                                           |
| QPYGVGVW     |            | <i>Solanum tuberosum</i>                                                                                                                           |
| QPFVGRW      |            | <i>Solanum tuberosum</i>                                                                                                                           |
| QPWGVGRW*    | Lyciumin O | <i>Solanum tuberosum</i>                                                                                                                           |
| QPFVVAW      |            | <i>Solanum tuberosum</i>                                                                                                                           |
| QPYGVLAW     |            | <i>Solanum tuberosum</i>                                                                                                                           |
| QPYGVSRW*    | Lyciumin N | <i>Solanum tuberosum</i>                                                                                                                           |
| QPWGVVAW*    | Lyciumin L | <i>Solanum tuberosum</i>                                                                                                                           |
| QPYGVFERW    |            | <i>Solanum tuberosum</i>                                                                                                                           |
| QPYGVFAW     |            | <i>Solanum tuberosum</i>                                                                                                                           |
| QPYGVGDW     |            | <i>Solanum tuberosum</i>                                                                                                                           |
| QPLGTWIW     |            | <i>Trifolium pratense</i>                                                                                                                          |
| QPFGLAAW     |            | <i>Trifolium pratense</i>                                                                                                                          |
| QPSGVYIW     |            | <i>Trifolium pratense</i>                                                                                                                          |
| QPATLLAW     |            | <i>Vigna unguiculata</i>                                                                                                                           |

|                         |          |
|-------------------------|----------|
| Multi-species peptides  | 11 (16%) |
| Single-species peptides | 60 (84%) |
| Total core peptides     | 71       |
| * Detected peptides     | 13 (18%) |

Table S6 | NMR analysis of lyciumin C from *Amaranthus hypochondriacus* (600 MHz, DMSO-d6).

| Residue              | H            | $\delta(^1\text{H})$ (int, m, $J$ )<br>[ppm] <sup>[a]</sup> | $\delta(^1\text{H})$ (int, m, $J$ )<br>[ppm] <sup>[b]</sup> |
|----------------------|--------------|-------------------------------------------------------------|-------------------------------------------------------------|
| PyroGlu <sup>1</sup> | $\alpha$     | 4.36 (1H, m)                                                | 4.36 (m)                                                    |
|                      | $\beta$      | 1.79 (m)/2.26 (1H, m)                                       | 1.79 (m)/2.24 (m)                                           |
|                      | $\gamma$     | 2.10 (2H, m)                                                | 2.09 (2H, m)                                                |
|                      | NH           | 8.10 (1H, s)                                                | n/a                                                         |
| Pro <sup>2</sup>     | $\alpha$     | 4.36 (1H, m)                                                | 4.36 (m)                                                    |
|                      | $\beta$      | 1.79 (1H, m)/2.01 (m)                                       | 1.79 (m)/1.96 (m)                                           |
|                      | $\gamma$     | 1.79 (2H, m)                                                | 1.79 (2H, m)                                                |
|                      | $\delta$     | 3.38 (1H, m)/3.64 (1H, t, 7.6)                              | 3.41 (m)/3.73 (t, 7)                                        |
| Tyr <sup>3</sup>     | $\alpha$     | 4.36 (1H, m)                                                | 4.36 (m)                                                    |
|                      | $\beta$      | 2.68 (2H, m)                                                | 2.74 (m)                                                    |
|                      | H2           | 6.69 (1H, d, 8.3)                                           | 6.68 (1H, d, 8)                                             |
|                      | H3           | 6.35 (1H, d, 8.4)                                           | 6.39 (1H, d, 8)                                             |
|                      | H5           | 6.35 (1H, d, 8.4)                                           | 6.39 (1H, d, 8)                                             |
|                      | H6           | 6.69 (1H, d, 8.3)                                           | 6.68 (1H, d, 8)                                             |
|                      | OH           | 7.27 (1H, m)                                                | 7.54 (s, OH)                                                |
|                      | NH           | 8.08 (1H, m)                                                | 7.99 (d, 6)                                                 |
| Gly <sup>4</sup>     | $\alpha$     | 6.65 (1H, d, 7.9)                                           | 6.63 (d, 8)                                                 |
|                      | NH           | 9.29 (1H, d, 8.1)                                           | 9.15 (d, 8)                                                 |
| Val <sup>5</sup>     | $\alpha$     | 4.31 (1H, m)                                                | 4.31 (m)                                                    |
|                      | $\beta$      | 1.86 (1H, m)                                                | 1.86 (m)                                                    |
|                      | $\gamma_1$   | 0.80 (3H, d, 7.2)                                           | 0.78 (3H, d, 7)                                             |
|                      | $\gamma_2$   | 0.67 (3H, d, 7.4)                                           | 0.63 (3H, d, 7)                                             |
| Phe <sup>6</sup>     | NH           | 7.98 (1H, m)                                                | 7.90 (m)                                                    |
|                      | $\alpha$     | 4.45 (1H, m)                                                | 4.36 (m)                                                    |
|                      | $\beta$      | 2.98 (1H, m)/3.16 (1H, m)                                   | 3.01 (m)/3.06 (m)                                           |
|                      | H2           | 7.22 (1H, m)                                                | 7.22 (1H, m)                                                |
|                      | H3           | 7.22 (1H, m)                                                | 7.22 (1H, m)                                                |
|                      | H4           | 7.22 (1H, m)                                                | 7.22 (1H, m)                                                |
|                      | H5           | 7.22 (1H, m)                                                | 7.22 (1H, m)                                                |
|                      | H6           | 7.22 (1H, m)                                                | 7.22 (1H, m)                                                |
| Ser <sup>7</sup>     | NH           | 8.15 (1H, d, 5.9)                                           | 8.30 (d, 7)                                                 |
|                      | $\alpha$     | 4.09 (1H, m)                                                | 4.16 (m)                                                    |
|                      | $\beta$      | 3.59 (2H, m)                                                | 3.65 (2H, m)                                                |
| Trp <sup>8</sup>     | NH           | 7.94 (1H, d, 5.7)                                           | 7.85 (d, 7)                                                 |
|                      | $\alpha$     | 4.60 (1H, m)                                                | 4.42 (m)                                                    |
|                      | $\beta$      | 3.16 (1H, m)/3.22 (1H, m)                                   | 3.01 (m)/3.09 (m)                                           |
|                      | H2           | 7.16 (1H, s)                                                | 7.09 (s)                                                    |
|                      | H4           | 7.53 (1H, d, 7.9)                                           | 7.51 (d, 8)                                                 |
|                      | H5           | 7.07 (1H, t, 7.5)                                           | 7.11 (t, 8)                                                 |
|                      | H6           | 7.17 (1H, m)                                                | 7.17 (t, 8)                                                 |
|                      | H7           | 7.41 (1H, d, 8.4)                                           | 7.35 (d, 8)                                                 |
| NH                   | 7.75 (1H, s) | 7.75 (d, 7)                                                 |                                                             |

[a] <sup>1</sup>H NMR data of isolated lyciumin C in DMSO-d6. Multiplicity m (s=singlet, d=doublet, t=triplet, dd=double doublet, m=multiplet), intensity int, coupling constants  $J$  in Hertz (Figure S12). [b] <sup>1</sup>H NMR data of lyciumin C in DMSO-d6 from reference 9.

**Table S7 | NMR analysis of lyciumin I from *Glycine max* (600 MHz, DMSO-d<sub>6</sub>).**

| Residue              | C          | $\delta(^{13}\text{C})$<br>[ppm] [a] | H          | $\delta(^1\text{H})$ (int, m, J)<br>[ppm] [b] | COSY [c]                                               | ROESY [d]                                                                                                                | HMBC [e]                                                                                                   |                                                    |
|----------------------|------------|--------------------------------------|------------|-----------------------------------------------|--------------------------------------------------------|--------------------------------------------------------------------------------------------------------------------------|------------------------------------------------------------------------------------------------------------|----------------------------------------------------|
| PyroGlu <sup>1</sup> | $\alpha$   | 53.6                                 | $\alpha$   | 4.35 (1H, m)                                  | PyroGlu <sup>1</sup> : H $\beta$ 1/2, Hy, NH           | PyroGlu <sup>1</sup> : H $\beta$ 1/2, Hy, NH, Pro <sup>2</sup> : H $\delta$ 1/2                                          | PyroGlu <sup>1</sup> : C $\beta$ , Cy, C $\delta$ , C=O                                                    |                                                    |
|                      | $\beta$    | 23.6                                 | $\beta$ 1  | 1.85 (1H, m)                                  | PyroGlu <sup>1</sup> : Ha, H $\beta$ 2, Hy             | PyroGlu <sup>1</sup> : Ha, H $\beta$ 2, Hy                                                                               | PyroGlu <sup>1</sup> : Ca, Cy, C $\delta$ , C=O                                                            |                                                    |
|                      | $\gamma$   | 29.0                                 | $\beta$ 2  | 2.25 (1H, m)                                  | PyroGlu <sup>1</sup> : Ha, H $\beta$ 1, Hy             | PyroGlu <sup>1</sup> : Ha, H $\beta$ 1, Hy                                                                               | PyroGlu <sup>1</sup> : Ca, Cy, C $\delta$ , C=O                                                            |                                                    |
|                      | $\delta$   | 177.2                                | $\gamma$   | 2.10 (2H, m)                                  | PyroGlu <sup>1</sup> : H $\beta$ 1/2                   | PyroGlu <sup>1</sup> : Ha, H $\beta$ 1/2                                                                                 | PyroGlu <sup>1</sup> : Ca, C $\beta$ , C $\delta$                                                          |                                                    |
|                      | C=O        | 171.8                                | NH         | 7.75 (1H, s)                                  | PyroGlu <sup>1</sup> : Ha                              | PyroGlu <sup>1</sup> : Ha, Hy, Pro <sup>2</sup> : H $\delta$ 2                                                           | PyroGlu <sup>1</sup> : Ca, C $\beta$ , Cy, C $\delta$                                                      |                                                    |
| Pro <sup>2</sup>     | $\alpha$   | 59.0                                 | $\alpha$   | 4.34 (1H, m)                                  | Pro <sup>2</sup> : H $\beta$ , Hy1/2                   | Pro <sup>2</sup> : H $\beta$ , Hy1/2, H $\delta$ 2                                                                       | PyroGlu <sup>1</sup> : C=O, Pro <sup>2</sup> : C $\beta$ , Cy, C $\delta$ , C=O                            |                                                    |
|                      | $\beta$    | 28.4                                 | $\beta$    | 1.77 (2H, m)                                  | Pro <sup>2</sup> : Ha, Hy1/2, H $\delta$ 1/2           | Pro <sup>2</sup> : Ha, Hy1/2, H $\delta$ 1/2                                                                             | Pro <sup>2</sup> : Ca, Cy, C $\delta$                                                                      |                                                    |
|                      | $\gamma$   | 24.4                                 | $\gamma$ 1 | 1.79 (1H, m)                                  | Pro <sup>2</sup> : Ha, H $\beta$ , Hy2, H $\delta$ 1/2 | Pro <sup>2</sup> : Ha, H $\beta$ , Hy2, H $\delta$ 1/2, Val <sup>5</sup> : Hy1/2                                         | Pro <sup>2</sup> : C $\beta$ , C $\delta$                                                                  |                                                    |
|                      | $\delta$   | 46.0                                 | $\gamma$ 2 | 1.83 (1H, m)                                  | Pro <sup>2</sup> : Ha, H $\beta$ , Hy1, H $\delta$ 1/2 | Pro <sup>2</sup> : Ha, H $\beta$ , Hy1, H $\delta$ 2                                                                     | Pro <sup>2</sup> : C $\beta$ , C $\delta$                                                                  |                                                    |
|                      |            | C=O                                  | 171.4      | $\delta$ 1                                    | 3.38 (1H, m)                                           | Pro <sup>2</sup> : H $\beta$ , Hy1/2, H $\delta$ 2                                                                       | PyroGlu <sup>1</sup> : Ha, H $\beta$ 2, Pro <sup>2</sup> : H $\beta$ , Hy1, H $\delta$ 2                   | Pro <sup>2</sup> : C $\beta$ , Cy                  |
|                      |            |                                      | $\delta$ 2 | 3.58 (1H, m)                                  | Pro <sup>2</sup> : H $\beta$ , Hy1/2, H $\delta$ 1     | PyroGlu <sup>1</sup> : Ha, NH, Pro <sup>2</sup> : Ha, H $\beta$ , Hy1/2, H $\delta$ 1                                    | Pro <sup>2</sup> : C $\beta$ , Cy                                                                          |                                                    |
| Tyr <sup>3</sup>     | $\alpha$   | 54.5                                 | $\alpha$   | 4.35 (1H, m)                                  | Tyr <sup>3</sup> : H $\beta$ 1/2, NH                   | Tyr <sup>3</sup> : H $\beta$ 1/2, H2/6, NH, Gly <sup>4</sup> : NH                                                        | Pro <sup>2</sup> : C=O, Tyr <sup>3</sup> : C $\beta$ , C=O                                                 |                                                    |
|                      | $\beta$    | 35.8                                 | $\beta$ 1  | 2.60 (1H, m)                                  | Tyr <sup>3</sup> : Ha, H $\beta$ 2                     | Tyr <sup>3</sup> : Ha, H2/6, NH                                                                                          | Tyr <sup>3</sup> : Ca, C1, C2/6, C=O                                                                       |                                                    |
|                      | C1         | 126.5                                | $\beta$ 2  | 2.70 (1H, m)                                  | Tyr <sup>3</sup> : Ha, H $\beta$ 1                     | Tyr <sup>3</sup> : Ha, H2/6                                                                                              | Tyr <sup>3</sup> : Ca, C1, C2/6, C=O                                                                       |                                                    |
|                      | C2         | 129.6                                | H2         | 6.68 (1H, d, 8.5)                             | Tyr <sup>3</sup> : H3                                  | Tyr <sup>3</sup> : Ha, H $\beta$ , H3/5                                                                                  | Tyr <sup>3</sup> : C $\beta$ , C3/5, C4, C6                                                                |                                                    |
|                      | C3         | 114.4                                | H3         | 6.35 (1H, d, 8.5)                             | Tyr <sup>3</sup> : H2                                  | Tyr <sup>3</sup> : H2/6                                                                                                  | Tyr <sup>3</sup> : C1, C4, C5                                                                              |                                                    |
|                      | C4         | 155.8                                | OH         | 9.18 (1H, br s)                               | n/a                                                    | n/a                                                                                                                      | n/a                                                                                                        |                                                    |
|                      | C5         | 114.4                                | H5         | 6.35 (1H, d, 8.5)                             | Tyr <sup>3</sup> : H6                                  | Tyr <sup>3</sup> : H2/6                                                                                                  | Tyr <sup>3</sup> : C1, C3, C4                                                                              |                                                    |
|                      | C6         | 129.6                                | H6         | 6.68 (1H, d, 8.5)                             | Tyr <sup>3</sup> : H5                                  | Tyr <sup>3</sup> : Ha, H $\beta$ , H3/5                                                                                  | Tyr <sup>3</sup> : C $\beta$ , C2, C3/5, C4                                                                |                                                    |
|                      |            | C=O                                  | 171.4      | NH                                            | 7.90 (1H, m)                                           | Tyr <sup>3</sup> : Ha                                                                                                    | Tyr <sup>3</sup> : Ha, H $\beta$ 1, Gly <sup>4</sup> : NH                                                  | Pro <sup>2</sup> : C=O                             |
|                      |            |                                      |            |                                               |                                                        |                                                                                                                          |                                                                                                            |                                                    |
| Gly <sup>4</sup>     | $\alpha$   | 61.0                                 | $\alpha$   | 6.64 (1H, d, 8.3)                             | Gly <sup>4</sup> : NH                                  | Gly <sup>4</sup> : NH, Val <sup>5</sup> : NH, Trp <sup>8</sup> : H2, H4                                                  | Tyr <sup>3</sup> : C=O, Gly <sup>4</sup> : C=O, Trp <sup>8</sup> : C2, C3                                  |                                                    |
|                      |            | C=O                                  | 166.5      | NH                                            | 9.28 (1H, d, 8.1)                                      | Gly <sup>4</sup> : Ha                                                                                                    | Tyr <sup>3</sup> : Ha, NH, Gly <sup>4</sup> : Ha, Trp <sup>8</sup> : H2, H4                                | Tyr <sup>3</sup> : C=O                             |
| Val <sup>5</sup>     | $\alpha$   | 61.4                                 | $\alpha$   | 3.68 (1H, t, 7.7)                             | Val <sup>5</sup> : H $\beta$ , NH                      | Val <sup>5</sup> : H $\beta$ , Hy1/2, Tyr <sup>6</sup> : NH                                                              | Gly <sup>4</sup> : C=O, Val <sup>5</sup> : C $\beta$ , Cy1/2, C=O                                          |                                                    |
|                      | $\beta$    | 28.5                                 | $\beta$    | 2.00 (1H, m)                                  | Val <sup>5</sup> : Ha, Hy1/2                           | Val <sup>5</sup> : Ha, Hy1/2, Tyr <sup>6</sup> : NH, H2/6                                                                | Val <sup>5</sup> : Ca, Cy1/2, C=O                                                                          |                                                    |
|                      | $\gamma$ 1 | 19.0                                 | $\gamma$ 1 | 0.67 (3H, d, 7.0)                             | Val <sup>5</sup> : H $\beta$ , Hy2                     | Pro <sup>2</sup> : Hy1, Val <sup>5</sup> : Ha, H $\beta$ , Hy2, Tyr <sup>6</sup> : H2/6, H3/5                            | Val <sup>5</sup> : Ca, C $\beta$ , Cy2                                                                     |                                                    |
|                      | $\gamma$ 2 | 18.4                                 | $\gamma$ 2 | 0.79 (3H, d, 7.0)                             | Val <sup>5</sup> : H $\beta$ , Hy1                     | Pro <sup>2</sup> : Hy1, Val <sup>5</sup> : Ha, H $\beta$ , Hy1, NH, Tyr <sup>6</sup> : H2/6, H3/5, Trp <sup>8</sup> : H4 | Val <sup>5</sup> : Ca, C $\beta$ , Cy1                                                                     |                                                    |
|                      |            | C=O                                  | 170.7      | NH                                            | 7.91 (1H, d, 6.2)                                      | Val <sup>5</sup> : Ha                                                                                                    | Gly <sup>4</sup> : Ha, Val <sup>5</sup> : Ha, H $\beta$ , Hy2, Tyr <sup>6</sup> : Ha                       | n/a                                                |
| Tyr <sup>6</sup>     | $\alpha$   | 55.7                                 | $\alpha$   | 4.31 (1H, m)                                  | Tyr <sup>6</sup> : H $\beta$ 1/2, NH                   | Val <sup>5</sup> : NH, Tyr <sup>6</sup> : H $\beta$ 1/2, H2/6, NH, Thr <sup>7</sup> : NH                                 | Tyr <sup>6</sup> : C $\beta$ , C=O                                                                         |                                                    |
|                      | $\beta$    | 35.6                                 | $\beta$ 1  | 2.91 (1H, m)                                  | Tyr <sup>6</sup> : Ha, H $\beta$ 2                     | Tyr <sup>6</sup> : Ha, H $\beta$ 2, H2/6, NH, Thr <sup>7</sup> : Hy, NH                                                  | Tyr <sup>6</sup> : Ca, C1, C2/6                                                                            |                                                    |
|                      | C1         | 126.4                                | $\beta$ 2  | 3.12 (1H, m)                                  | Tyr <sup>6</sup> : Ha, H $\beta$ 1                     | Tyr <sup>6</sup> : Ha, H $\beta$ 1, H2/6, NH, Thr <sup>7</sup> : Hy, NH                                                  | Tyr <sup>6</sup> : Ca, C1, C2/6                                                                            |                                                    |
|                      | C2         | 129.7                                | H2         | 7.01 (1H, d, 8.5)                             | Tyr <sup>6</sup> : H3                                  | Val <sup>5</sup> : H $\beta$ , Hy1/2, Tyr <sup>6</sup> : Ha, H $\beta$ 1/2, H3                                           | Tyr <sup>6</sup> : C $\beta$ , C3/5, C4, C6                                                                |                                                    |
|                      | C3         | 114.7                                | H3         | 6.63 (1H, d, 8.5)                             | Tyr <sup>6</sup> : H2                                  | Val <sup>5</sup> : Hy1/2, Tyr <sup>6</sup> : H2                                                                          | Tyr <sup>6</sup> : C5, C4                                                                                  |                                                    |
|                      | C4         | 155.6                                | OH         | 9.18 (1H, br s)                               | n/a                                                    | n/a                                                                                                                      | n/a                                                                                                        |                                                    |
|                      | C5         | 114.7                                | H5         | 6.63 (1H, d, 8.5)                             | Tyr <sup>6</sup> : H6                                  | Val <sup>5</sup> : Hy1/2, Tyr <sup>6</sup> : H6                                                                          | Tyr <sup>6</sup> : C3, C4                                                                                  |                                                    |
|                      | C6         | 129.7                                | H6         | 7.01 (1H, d, 8.5)                             | Tyr <sup>6</sup> : H5                                  | Val <sup>5</sup> : H $\beta$ , Hy1/2, Tyr <sup>6</sup> : Ha, H $\beta$ 1/2, H5                                           | Tyr <sup>6</sup> : C $\beta$ , C2, C3/5, C4                                                                |                                                    |
|                      |            | C=O                                  | 171.7      | NH                                            | 8.02 (1H, d, 7.7)                                      | Tyr <sup>6</sup> : Ha                                                                                                    | Val <sup>5</sup> : Ha, H $\beta$ , Tyr <sup>6</sup> : Ha, H $\beta$ 1, Trp <sup>8</sup> : H4               | Val <sup>5</sup> : C=O                             |
|                      |            |                                      |            |                                               |                                                        |                                                                                                                          |                                                                                                            |                                                    |
| Thr <sup>7</sup>     | $\alpha$   | 60.0                                 | $\alpha$   | 4.00 (1H, m)                                  | Thr <sup>7</sup> : H $\beta$ , Hy, NH                  | Thr <sup>7</sup> : H $\beta$ , Hy, NH, Trp <sup>8</sup> : NH                                                             | Tyr <sup>6</sup> : C=O, Thr <sup>7</sup> : C $\beta$ , Cy, C=O                                             |                                                    |
|                      | $\beta$    | 66.5                                 | $\beta$    | 4.02 (1H, m)                                  | Thr <sup>7</sup> : Ha, Hy, NH                          | Tyr <sup>6</sup> : NH, Thr <sup>7</sup> : Ha, Hy, NH                                                                     | Thr <sup>7</sup> : Ca, Cy, C=O                                                                             |                                                    |
|                      | $\gamma$   | 19.6                                 | OH         | 4.84 (1H, m)                                  | n/a                                                    | n/a                                                                                                                      | n/a                                                                                                        |                                                    |
|                      |            | C=O                                  | 169.4      | $\gamma$                                      | 1.10 (3H, d, 6.0)                                      | Thr <sup>7</sup> : Ha, H $\beta$                                                                                         | Tyr <sup>6</sup> : H $\beta$ 1/2, H2/6, Thr <sup>7</sup> : Ha, H $\beta$ , NH, Trp <sup>8</sup> : NH       | Thr <sup>7</sup> : Ca, C $\beta$ , C=O             |
|                      |            |                                      |            | NH                                            | 7.84 (1H, d, 5.0)                                      | Thr <sup>7</sup> : Ha, H $\beta$                                                                                         | Tyr <sup>6</sup> : Ha, H $\beta$ 1/2, NH, Thr <sup>7</sup> : Ha, H $\beta$ , Hy, Trp <sup>8</sup> : H2, NH | Tyr <sup>6</sup> : Ca, C=O, Thr <sup>7</sup> : C=O |
| Trp <sup>8</sup>     | $\alpha$   | 51.4                                 | $\alpha$   | 4.57 (1H, m)                                  | Trp <sup>8</sup> : H $\beta$ 1/2, NH                   | Trp <sup>8</sup> : H $\beta$ 1/2, H2, H7, NH                                                                             | Thr <sup>7</sup> : C=O, Trp <sup>8</sup> : C $\beta$ , C1, C=O                                             |                                                    |
|                      | $\beta$    | 26.1                                 | $\beta$ 1  | 3.12 (1H, m)                                  | Trp <sup>8</sup> : Ha, H $\beta$ 2                     | Trp <sup>8</sup> : Ha, H7, NH                                                                                            | Trp <sup>8</sup> : Ca, C1, C2, C=O                                                                         |                                                    |
|                      | C1         | 111.0                                | $\beta$ 2  | 3.20 (1H, m)                                  | Trp <sup>8</sup> : Ha, H $\beta$ 1                     | Trp <sup>8</sup> : Ha, H7, NH                                                                                            | Trp <sup>8</sup> : Ca, C1, C2, C=O                                                                         |                                                    |
|                      | C2         | 125.0                                | H2         | 7.33 (1H, s)                                  | Trp <sup>8</sup> : H7                                  | Gly <sup>4</sup> : Ha, NH, Thr <sup>7</sup> : Ha, NH, Trp <sup>8</sup> : Ha, H $\beta$ , NH                              | Gly <sup>4</sup> : Ca, Trp <sup>8</sup> : C1, C3, C8                                                       |                                                    |
|                      | C3         | 135.8                                | H4         | 7.40 (1H, d, 8.3)                             | Trp <sup>8</sup> : H2, H4, H5, H6                      | Gly <sup>4</sup> : Ha, NH, Val <sup>5</sup> : Hy2, Tyr <sup>6</sup> : NH, Trp <sup>8</sup> : H5, H6                      | Trp <sup>8</sup> : C1, C3, C6, C8                                                                          |                                                    |
|                      | C4         | 109.6                                | H5         | 7.07 (1H, t, 7.5)                             | Trp <sup>8</sup> : H4, H5, H7                          | Trp <sup>8</sup> : H4, H6, H7                                                                                            | Trp <sup>8</sup> : C4, C7, C8                                                                              |                                                    |
|                      | C5         | 119.2                                | H6         | 7.14 (1H, t, 7.5)                             | Trp <sup>8</sup> : H6, H7                              | Trp <sup>8</sup> : H4, H5, H7                                                                                            | Trp <sup>8</sup> : C3, C4, C7                                                                              |                                                    |
|                      | C6         | 121.3                                | H7         | 7.52 (1H, d, 7.9)                             | Trp <sup>8</sup> : H6, H7                              | Trp <sup>8</sup> : Ha, H $\beta$ 1/2, H5, H6                                                                             | Trp <sup>8</sup> : C1, C3, C5, C6, C7, C8                                                                  |                                                    |
|                      | C7         | 118.1                                | NH         | 8.10 (1H, d, 7.5)                             | Trp <sup>8</sup> : Ha                                  | Thr <sup>7</sup> : Ha, Hy, NH, Trp <sup>8</sup> : Ha, H $\beta$ 1/2, H2                                                  | Thr <sup>7</sup> : C=O                                                                                     |                                                    |
|                      |            | C8                                   | 128.0      |                                               |                                                        |                                                                                                                          |                                                                                                            |                                                    |
|                      |            | C=O                                  | 172.9      |                                               |                                                        |                                                                                                                          |                                                                                                            |                                                    |

[a] <sup>13</sup>C NMR data of major conformer of isolated lyciumin I in DMSO-d<sub>6</sub>. Values were derived from HSQC and HMBC NMR analyses (Figure S19 & S20), [b] <sup>1</sup>H NMR data of major conformer of isolated lyciumin I in DMSO-d<sub>6</sub>. Multiplicity m (s=singlet, d=doublet, t=triplet, dd=double doublet, m=multiplet), intensity int, coupling constants J in Hertz (Figure S16), [c] <sup>1</sup>H-<sup>1</sup>H COSY correlations of major conformer of lyciumin I in DMSO-d<sub>6</sub> (Figure S17), [d] ROESY correlations of major conformer of lyciumin I in DMSO-d<sub>6</sub> (Figure S21), [e] HMBC correlations of major conformer of lyciumin I in DMSO-d<sub>6</sub> (Figure S20)



**Table S8 | Bioinformatic analysis of lyciumin precursor genes and co-clustered glutamine cyclotransferase genes in genomes of *Beta vulgaris* and *Chenopodium quinoa* (Figure 3C).**

| Gene                                       | Predicted function             | Reference      | Gene product length [aa] | Closest functional blastp homolog (organism) [Similarity/Identity, %/ %]                                                  |
|--------------------------------------------|--------------------------------|----------------|--------------------------|---------------------------------------------------------------------------------------------------------------------------|
| <i>Chenopodium quinoa</i> (v1.0) locus     |                                |                |                          |                                                                                                                           |
| AUR62017095-RA ( <i>CquBURP1</i> )         | BURP domain lyciumin precursor | XP_021740703.1 | 619                      | XP_010675925.1 PREDICTED: BURP domain protein USPL1 [ <i>Beta vulgaris subsp. vulgaris</i> ] [68/57]                      |
| AUR62017096-RA                             | Glutamine cyclotransferase     | XP_021740704.1 | 286                      | XP_010675927.1 PREDICTED: glutaminyl-peptide cyclotransferase isoform X1 [ <i>Beta vulgaris subsp. vulgaris</i> ] [80/71] |
| <i>Beta vulgaris</i> locus (RefBeet-1.2.2) |                                |                |                          |                                                                                                                           |
| LOC104891851 ( <i>BvuBURP2</i> )           | BURP domain lyciumin precursor | XP_010675925.1 | 446                      | XP_010676059.1 PREDICTED: BURP domain protein USPL1-like ( <i>Beta vulgaris subsp. vulgaris</i> ) [93/89]                 |
| LOC104891854                               | Glutamine cyclotransferase     | XP_010675927.1 | 306                      | XP_021771347.1 glutaminyl-peptide cyclotransferase-like isoform X1 [ <i>Chenopodium quinoa</i> ]                          |
| LOC104891968 ( <i>BvuBURP1</i> )           | BURP domain lyciumin precursor | XP_010676059.1 | 404                      | XP_010675925.1 PREDICTED: BURP domain protein USPL1 ( <i>Beta vulgaris subsp. vulgaris</i> ) [93/89]                      |
| LOC104891853                               | Glutamine cyclotransferase     | XP_010675926.1 | 201                      | XP_021740704.1 glutaminyl-peptide cyclotransferase-like ( <i>Chenopodium quinoa</i> ) [73/68]                             |

**Table S9 | LC-MS dataset accessions (MassIVE, GNPS) (21)**

| Dataset                        | Figure                         | MassIVE dataset accession |
|--------------------------------|--------------------------------|---------------------------|
| Amaranth_grain                 | Figure S11, S27                | MSV000082522              |
| beet_root                      | Figure S13, S27                | MSV000082523              |
| Chenopodium-quinoa-flower      | Figure S14, S27                | MSV000082525              |
| Eggplant-stem                  | Figure S22                     | MSV000082526              |
| Lycium-barbarum-root (LB-root) | Figure 1, S1, S4, S6, S29, S31 | MSV000082527              |
| Medicago_truncatula_seed       | Figure S23                     | MSV000082528              |
| Potato_tuber_sprout            | Figure S26                     | MSV000082529              |
| Russett-potato-sprout          | Figure S26                     | MSV000082530              |
| Soy-root                       | Figure S15                     | MSV000082532              |
| NB-At-LBA4404-pEAQ-6d          | Figure 1, 3                    | MSV000082533              |
| NB-At-LBA4404-pEAQ-Sali3-2-6d  | Figure 4                       | MSV000082534              |
| NB-LbaLycA-6d                  | Figure 1, S29, S31             | MSV000082536              |
| NB-Sali3-2-QAYGVYTW-6d         | Figure 4, S32                  | MSV000082537              |
| NB-Sali3-2-QGVYTW-6d           | Figure 4                       | MSV000082538              |
| NB-Sali3-2-QPAGVYTW            | Figure S33                     | MSV000082539              |
| NB-Sali3-2-QPFGFFSW            | Figure S43                     | MSV000082540              |
| NB-Sali3-2-QPFGVYTW            | Figure S42                     | MSV000082541              |
| NB-Sali3-2-QPWVGAW             | Figure S40                     | MSV000082542              |
| NB-Sali3-2-QPWVGVTW            | Figure S39                     | MSV000082543              |
| NB-Sali3-2-QPWGVYSW            | Figure S44                     | MSV000082544              |
| NB-Sali3-2-QPWGVYTW            | Figure S42                     | MSV000082545              |
| NB-Sali3-2-QPYAVYTW            | Figure S34                     | MSV000082546              |
| NB-Sali3-2-QPYGAYTW            | Figure S35                     | MSV000082547              |
| NB-Sali3-2-QPYGVATW            | Figure S36                     | MSV000082548              |
| NB-Sali3-2-QPYGVYAW            | Figure S37                     | MSV000082549              |
| NB-Sali3-2-QPYGVYFW            | Figure S45                     | MSV000082550              |
| NB-Sali3-2-QPYGVYTA            | Figure 4                       | MSV000082552              |
| NB-Sali3-2-QPYGVYTAW           | Figure 4                       | MSV000082553              |
| NB-Sali3-2-QPYTVYTW            | Figure S38                     | MSV000082555              |
| NB-Sali3-2-QYGVYTW             | Figure 4                       | MSV000082556              |
| NB-StuBURP-6d                  | Figure S26                     | MSV000082557              |

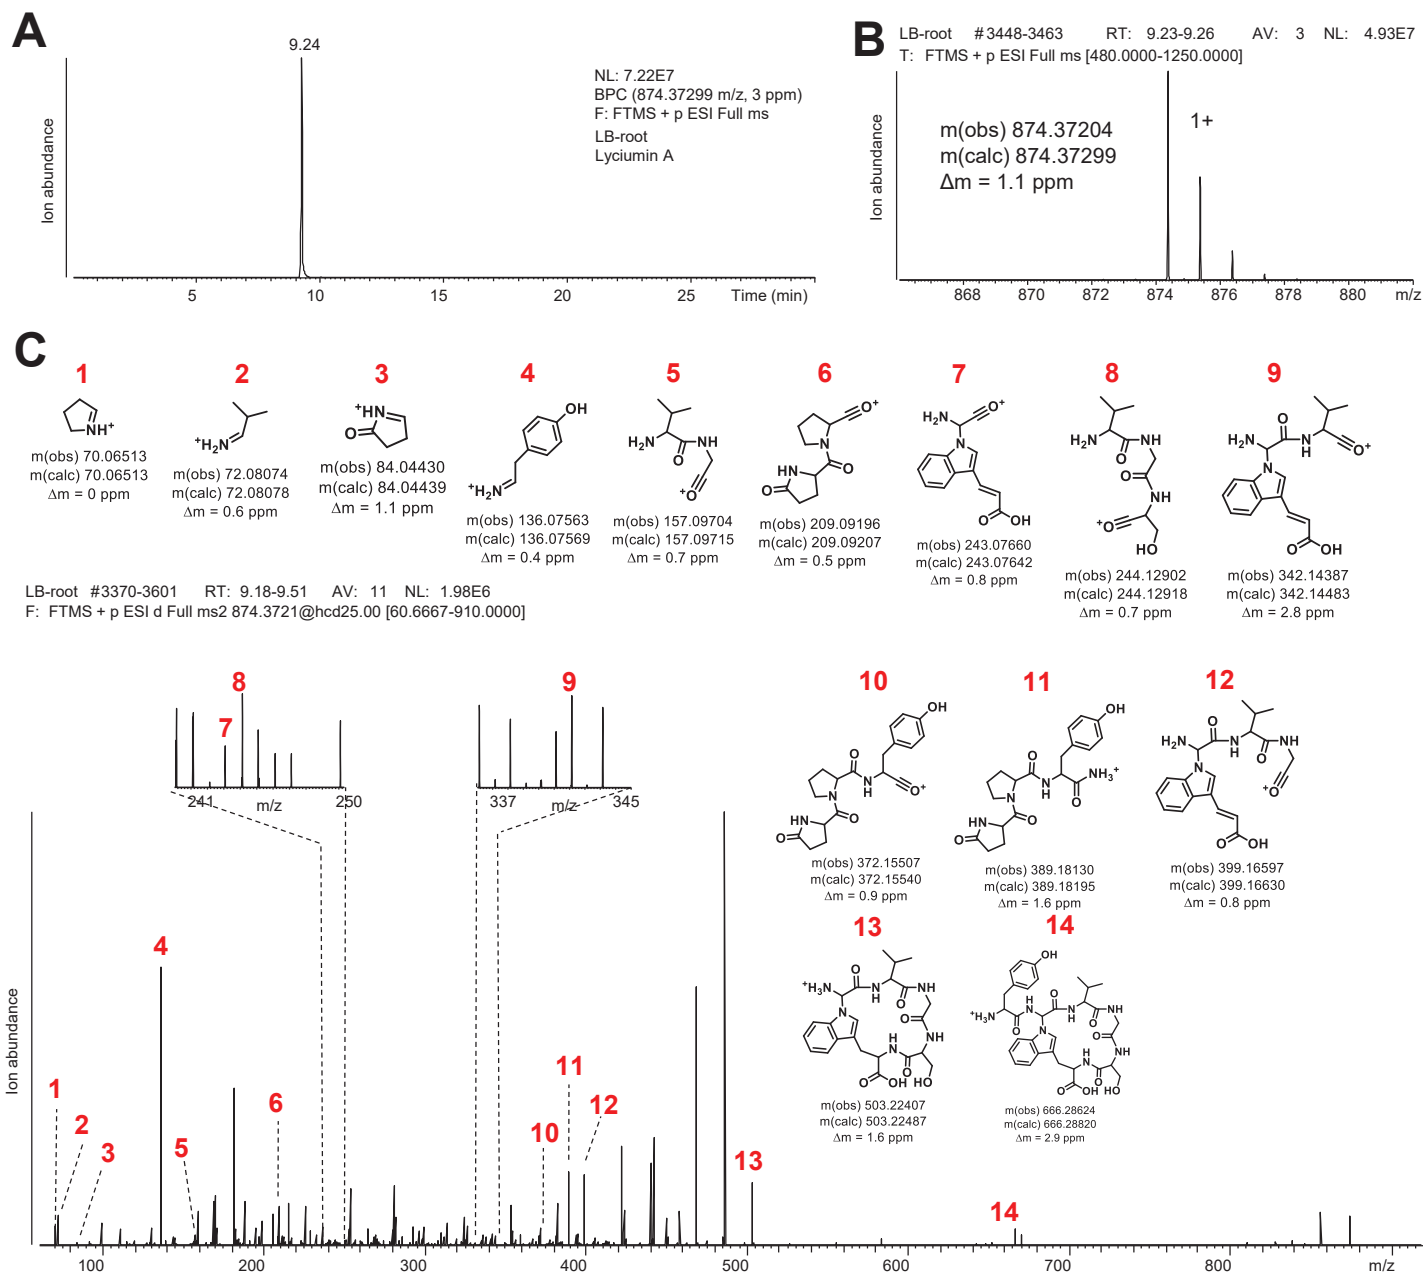

**Figure S1 | MS analysis of lyciumin A. (A)** LC-MS chemotyping of predicted lyciumin A in peptide extract of *Lycium barbarum* root. **(B)** MS analysis of lyciumin A. **(C)** MS/MS analysis of lyciumin A.

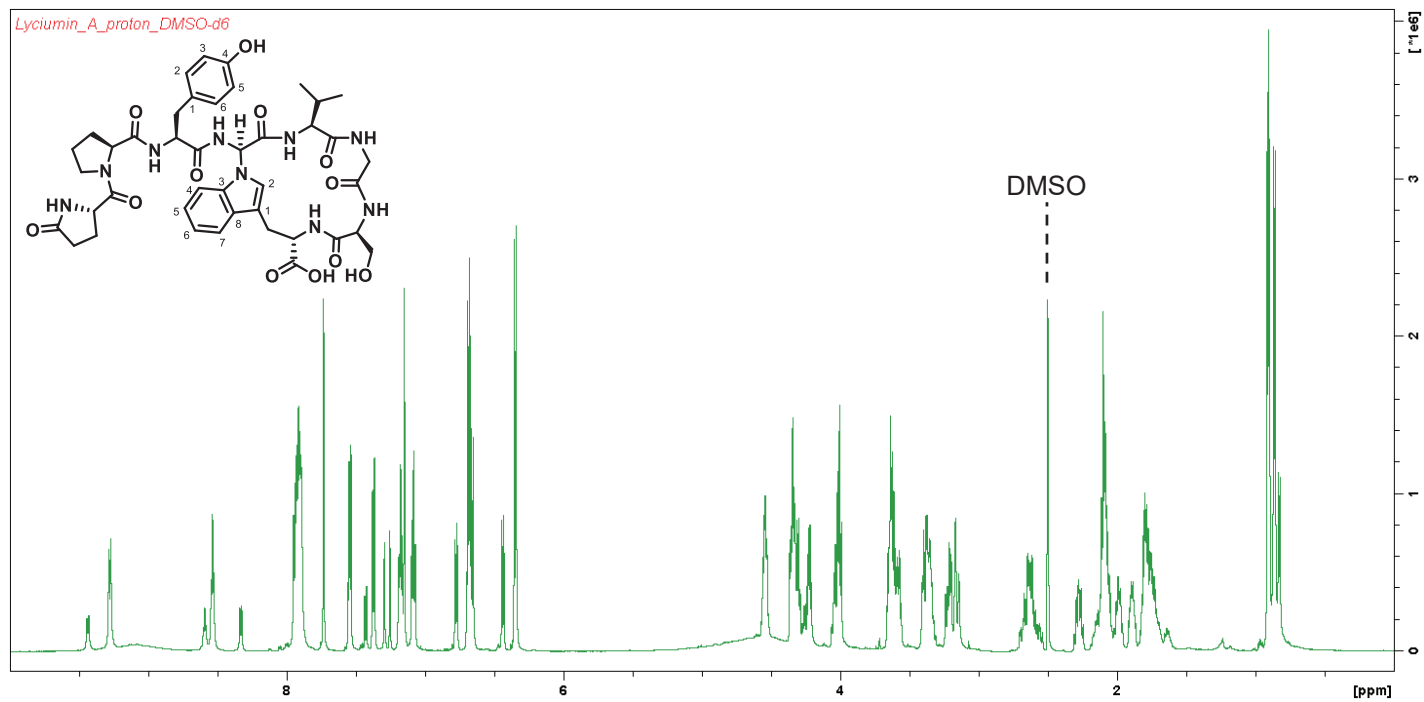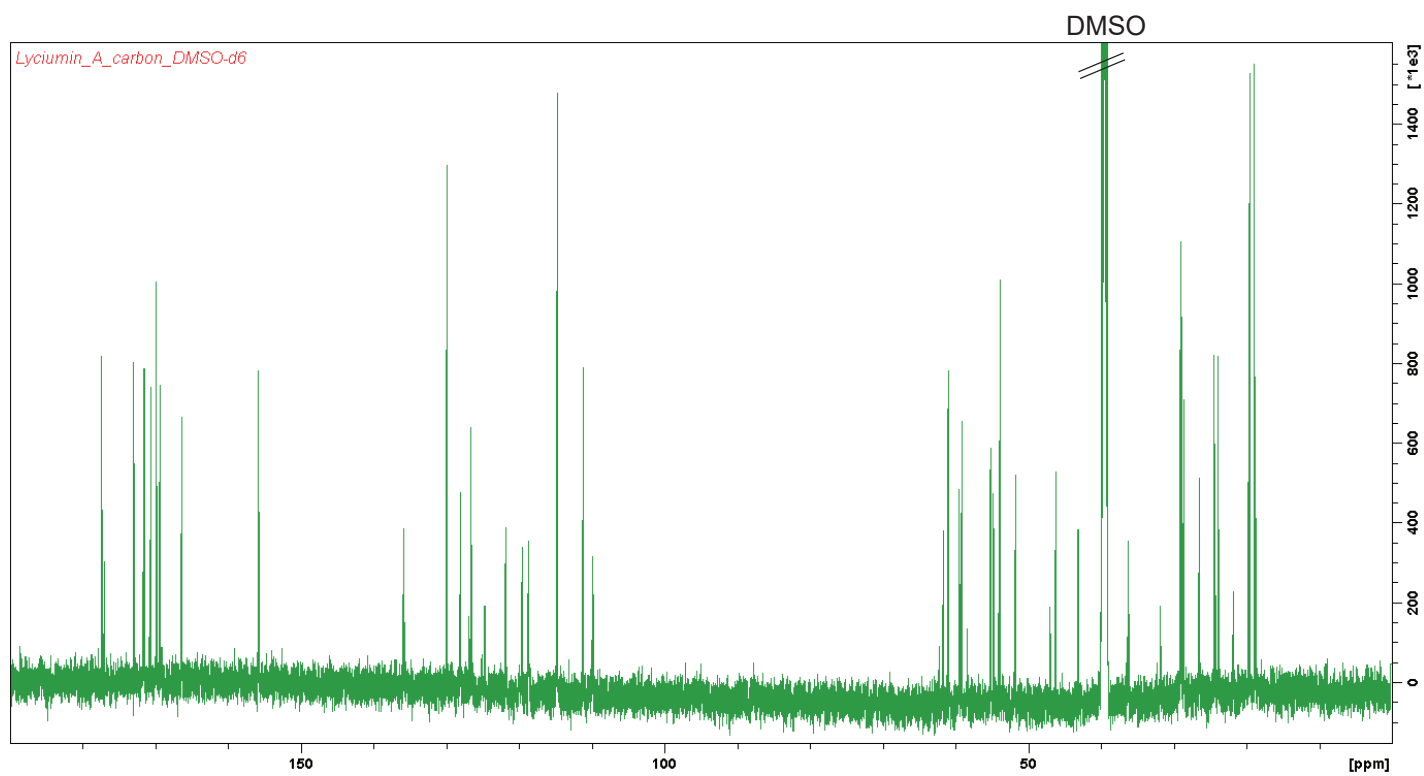

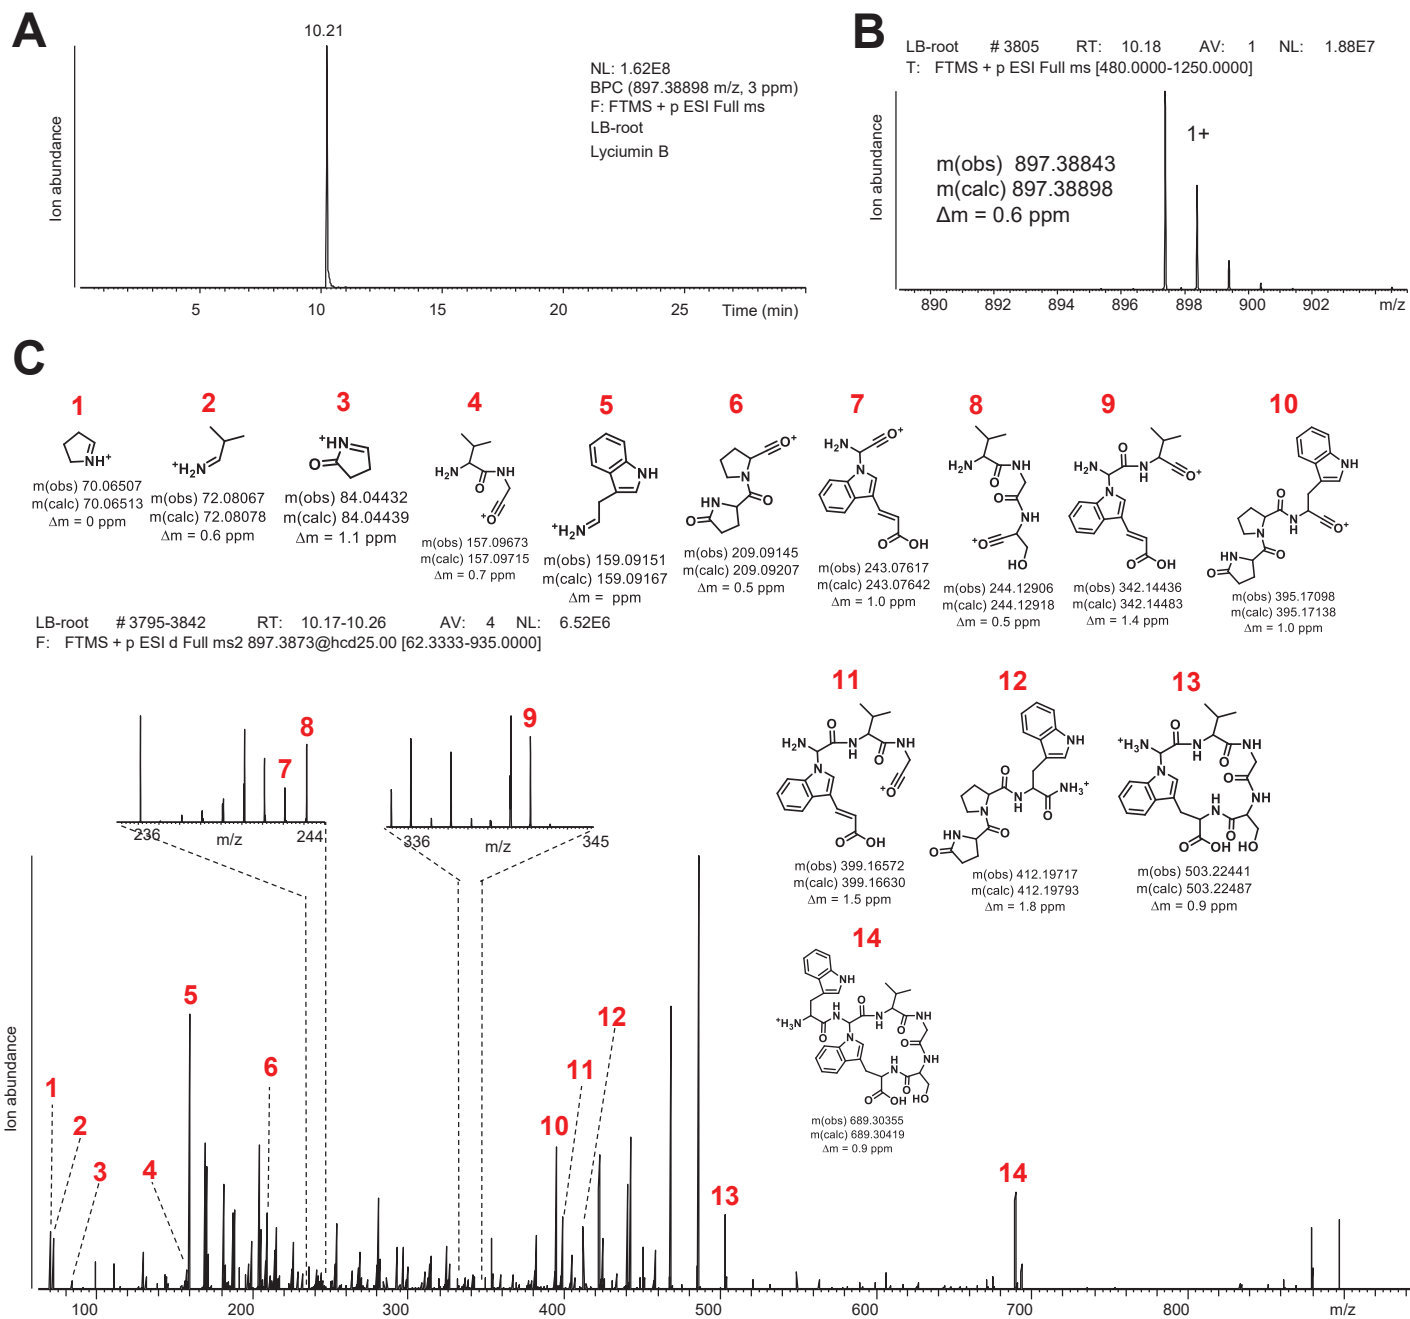

**Figure S4 | MS analysis of lyciumin B. (A) LC-MS chemotyping of predicted lyciumin B in peptide extract of *Lycium barbarum* root. (C) MS analysis of lyciumin B. (D) MS/MS analysis of lyciumin B.**

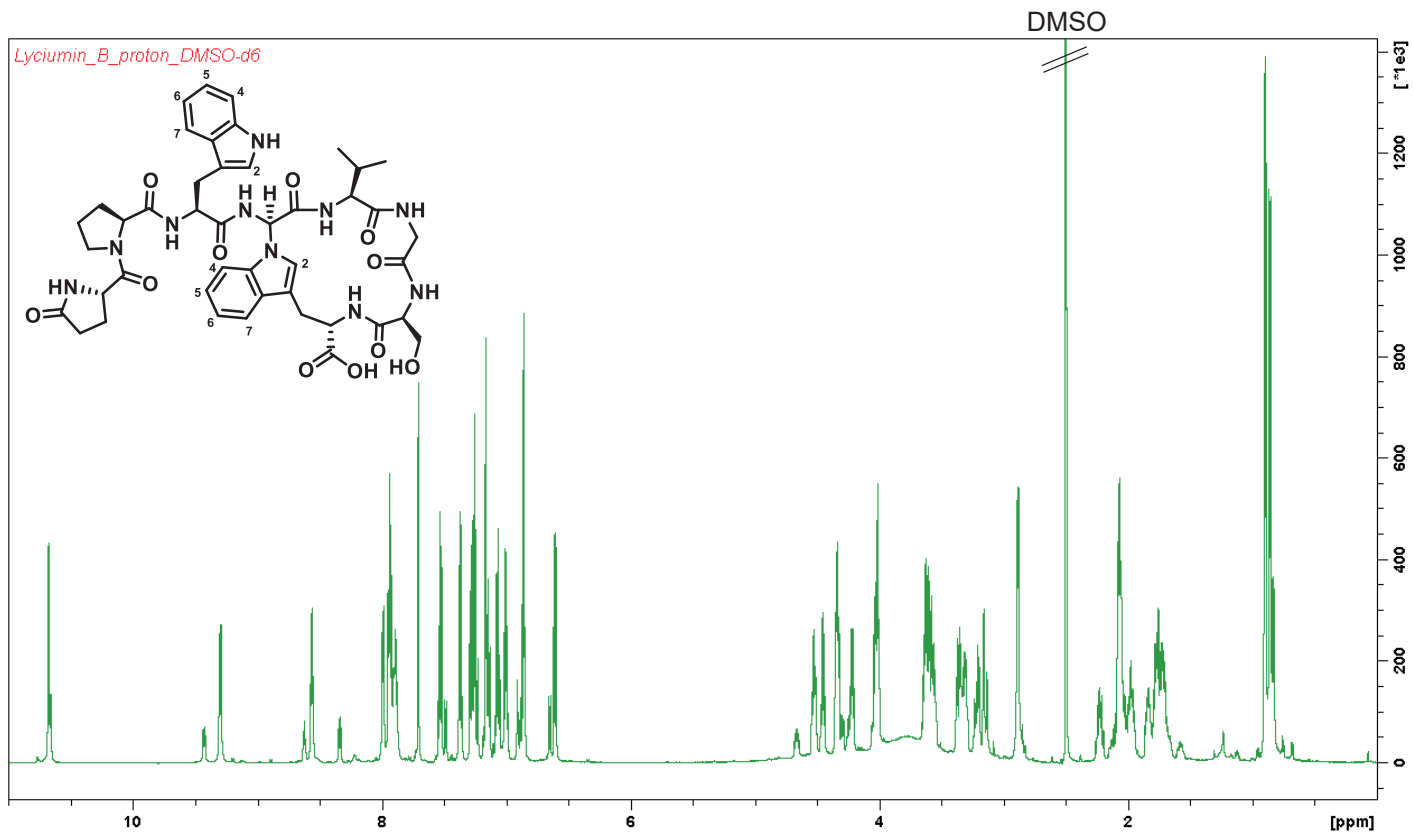

Figure S5 |  $^1\text{H}$  NMR spectrum of lyciumin B in DMSO-d<sub>6</sub> (600 MHz).

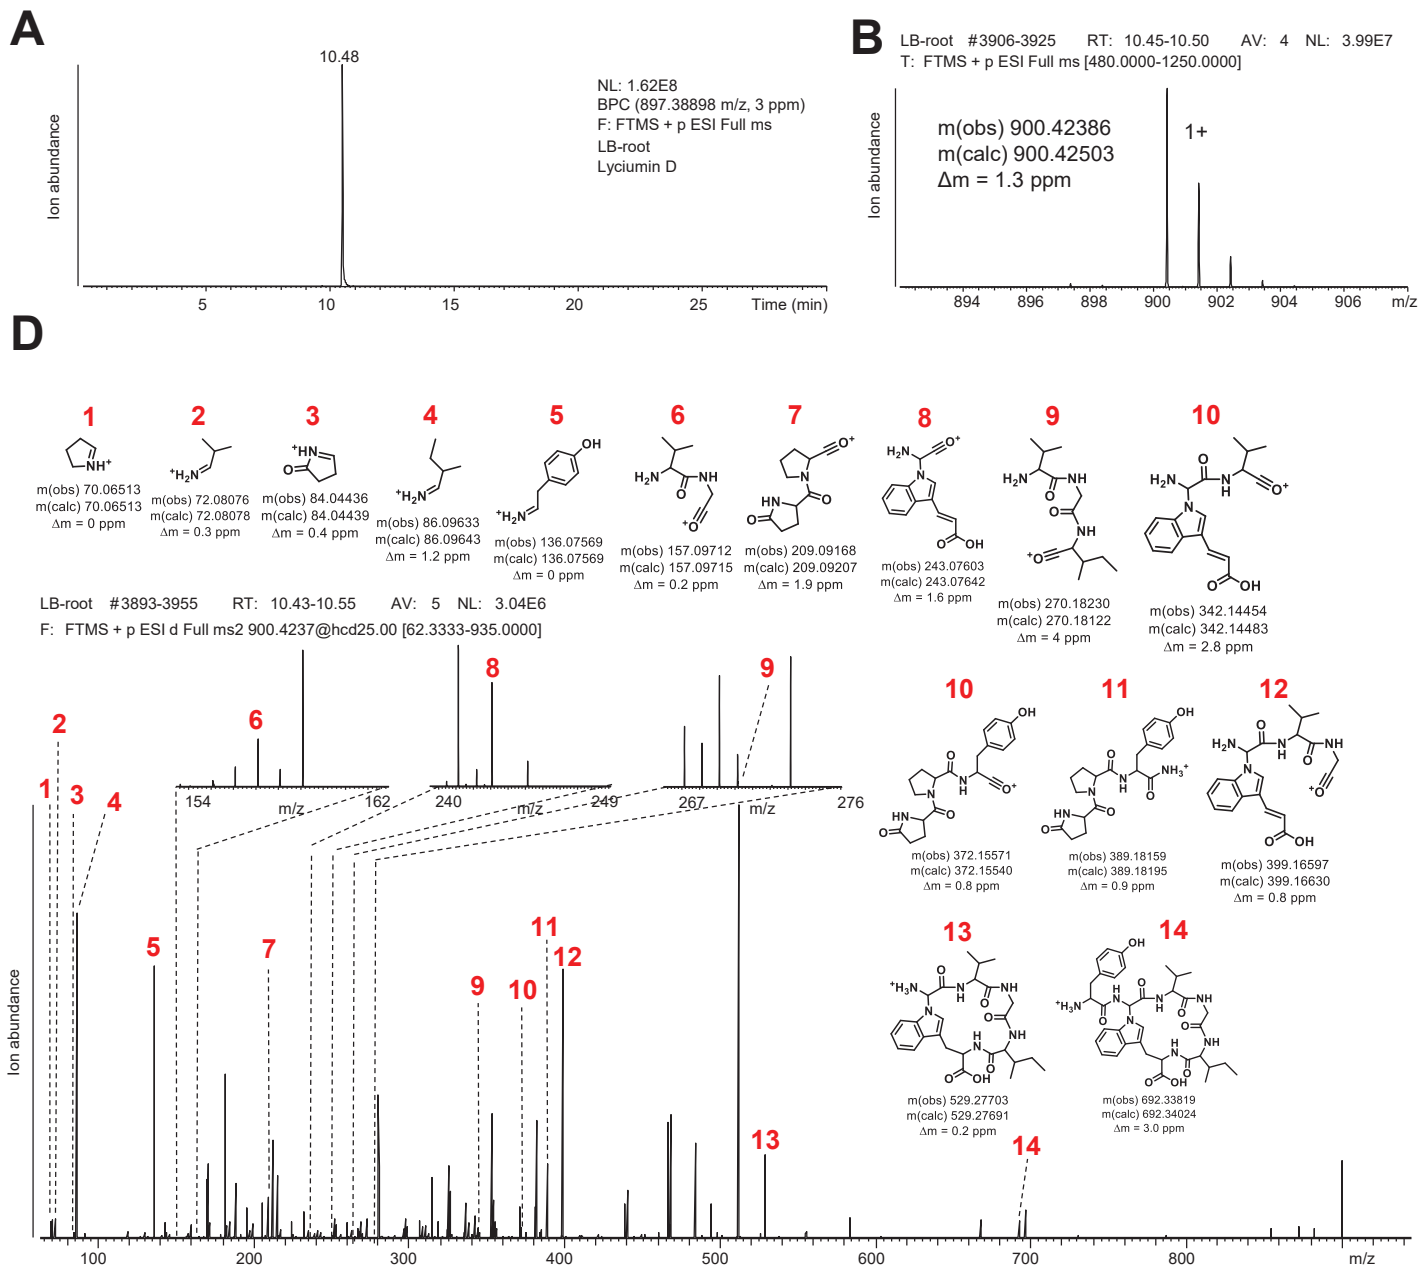

**Figure S6 | MS analysis of lyciumin D. (A)** Lycium D planar structure. **(B)** LC-MS chemotyping of predicted lyciumin D in peptide extract of *Lycium barbarum* root. **(C)** MS analysis of lyciumin D. **(D)** MS/MS analysis of lyciumin D.

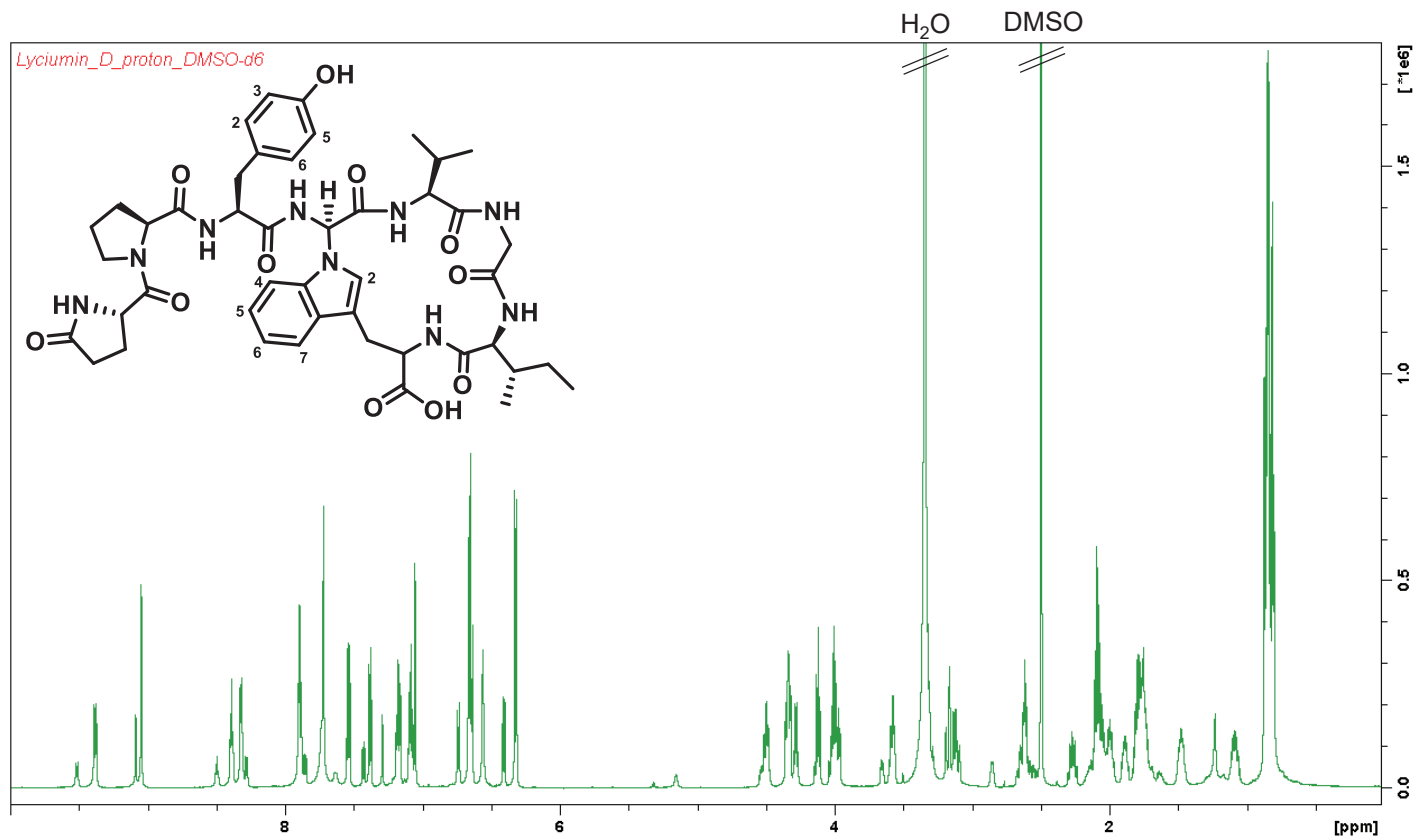

Figure S7 | <sup>1</sup>H NMR spectrum of lyciumin D in DMSO-d<sub>6</sub> (600 MHz).

```

>TRINITY_DN33942_c2_g1_i2|m.67 TRINITY_DN33942_c2_g1_i2|g.67 type:5prime_partial len:297
gc:universal TRINITY_DN33942_c2_g1_i2:2-892(+)
EGDVKKLFPWGVGSWYQAANEGDVKKLRQPYGVGIWYEAANEGQVKKLRQPYGVGSWYNTATKKDVNENLPVTPYFFETDLHQGKKMNLPSL
KNYNPAPILPRKVADSI PFSSDKIEEILKHFSIDKDSEGAKMIKKTIKMCEEQAGNGEKKYCATSLESMDVFTSSYLGTNNIIALSTLVEKET
PEVQIYTIIEVKEKANGKGVICHKVAYPYAIHYCHSVGSTRTFMVMVMSDGTQVNAVSECHEDTAPMNPALPFQLLNVPKPGDKPICHFIELD
DQIALVPSQDATQVSEN
>TRINITY_DN32732_c0_g2_i1|m.98 TRINITY_DN32732_c0_g2_i1|g.98 type:internal len:130
gc:universal TRINITY_DN32732_c0_g2_i1:389-3(-)
GIKQQTRVMLKNYANHGEWVPGIKQQTRVMLKNYTNHGEWVPGIKQQTRVMLKNYPNHGEWVPGIKQQTRVMLKNYANHMELVYGMKQQTRVK
LKKLRQPYGVGSWYQAANEGDVKKIRQPYGVGSWYQ
>TRINITY_DN32732_c0_g2_i3|m.101 TRINITY_DN32732_c0_g2_i3|g.101 type:5prime_partial len:345
gc:universal TRINITY_DN32732_c0_g2_i3:1216-182(-)
WYQAANEGDVKKLRQPYGVGSWYQAANEGDVKKLHQPYGVGSWYQAANEGDVKKLRQPYGVGSWYQAANEGDVKKLRQPYGVGIWYEAANEGQ
VKKLRQPYGVGSWYNTATKKDVNENLPVTPYFFETDLRQGKKMNLPSLKNYNPAPILPRKVADSI PFSSDKIEEILKHFSIDKDSEGAKMIK
TIKMCEEQAGNGEKKYCATSLESMDVFTSSYLGTNNIIALSTLVEKETPEVQIYTIIEVKEKANGKGVICHKVAYPYAIHYCHSVGSTRTFMV
SMVMSDGTQVNAVSECHEDTAPMNPALPFQLLNVPKPGDKPICHFILDDQIALVPSQDATQVSEN

```

**Figure S8 | Candidate transcripts of lyciumin precursor peptide gene from *Lycium barbarum* root transcriptome.** Predicted lyciumin core peptides are highlighted in green (lyciumin A), blue (lyciumin B) and red (lyciumin D).

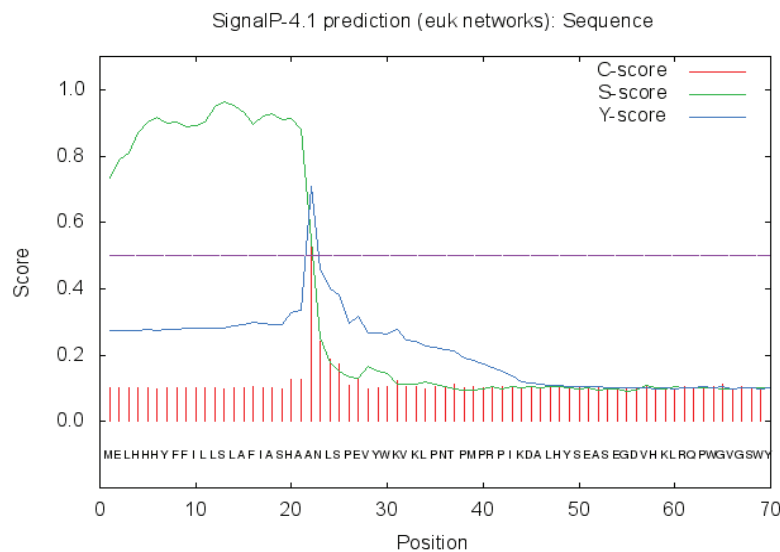

**Figure S9 | Signal peptide prediction of LbaLycA with SignalP-4.1.**



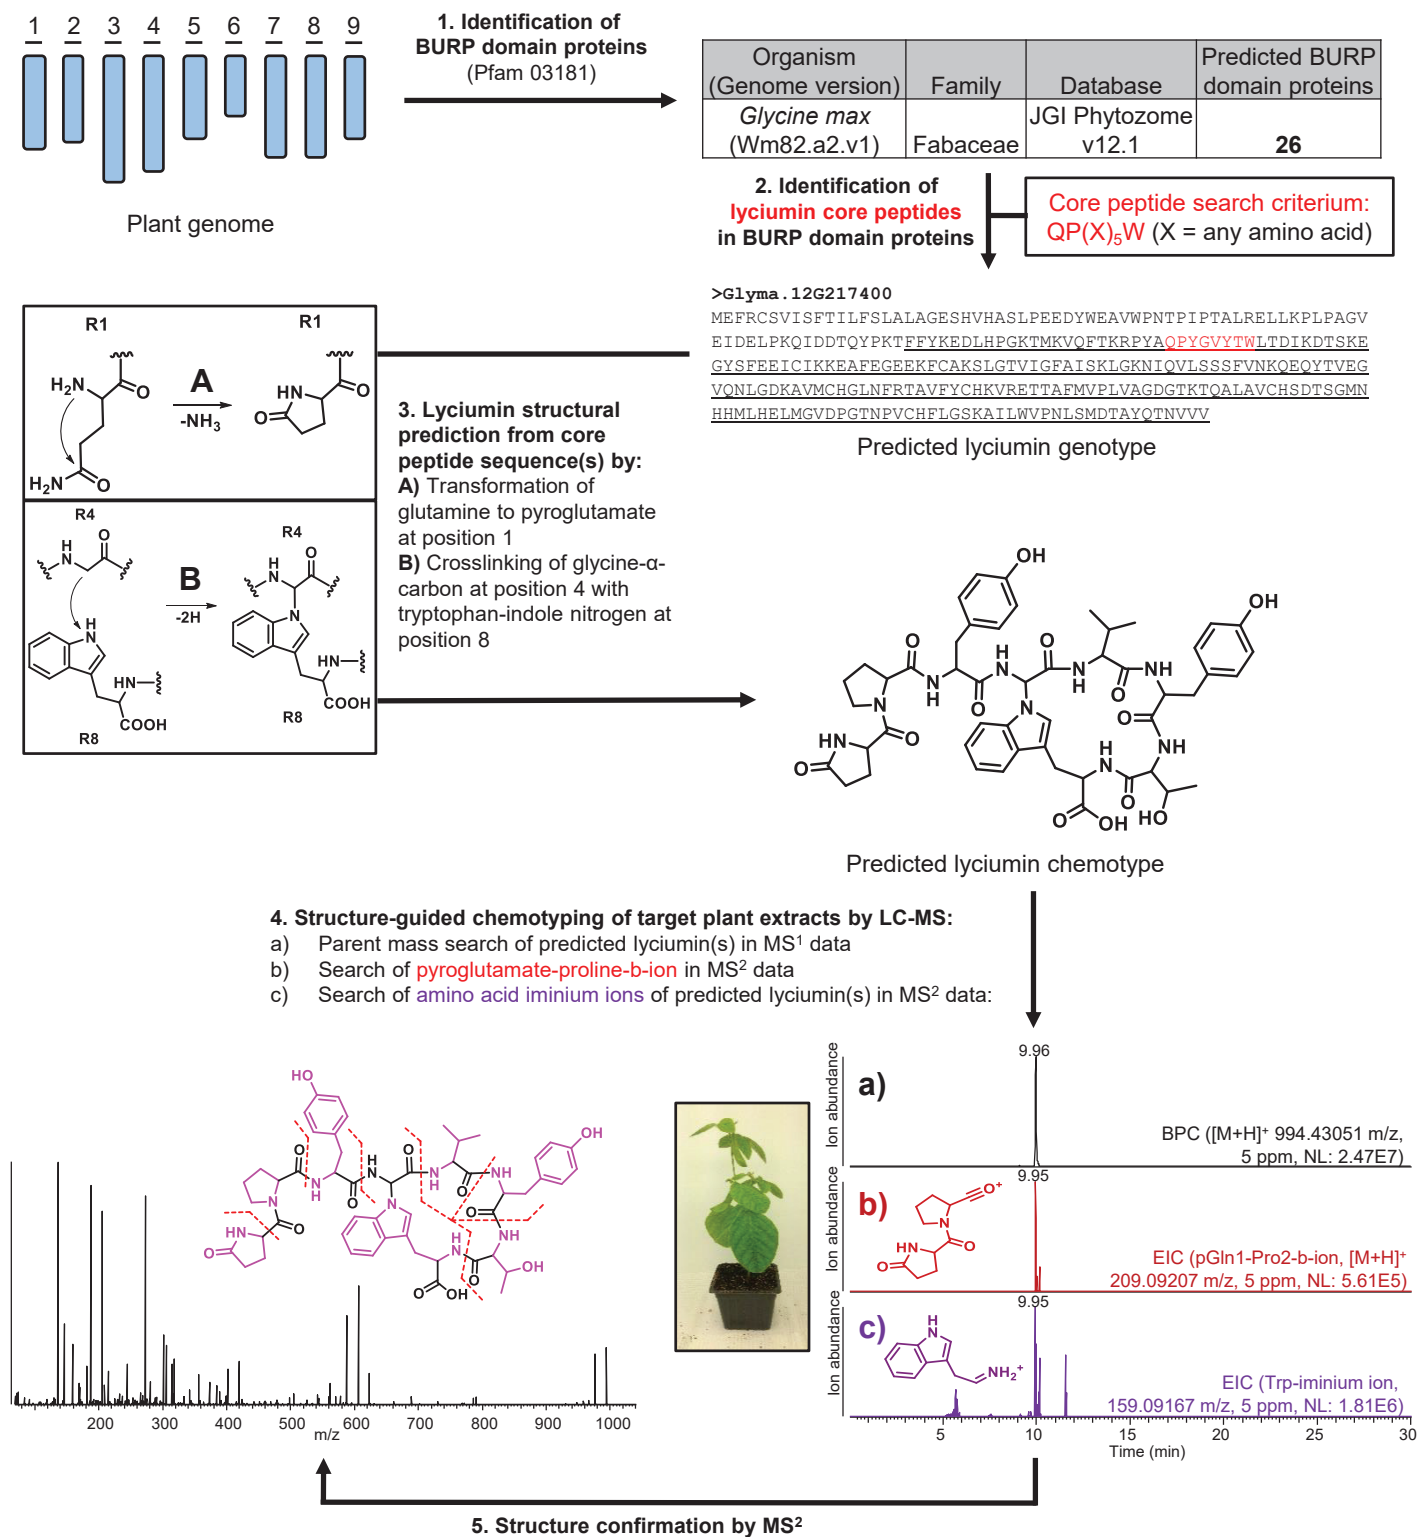

Figure S10 | Precursor gene-guided genome mining workflow for lyciumin discovery.

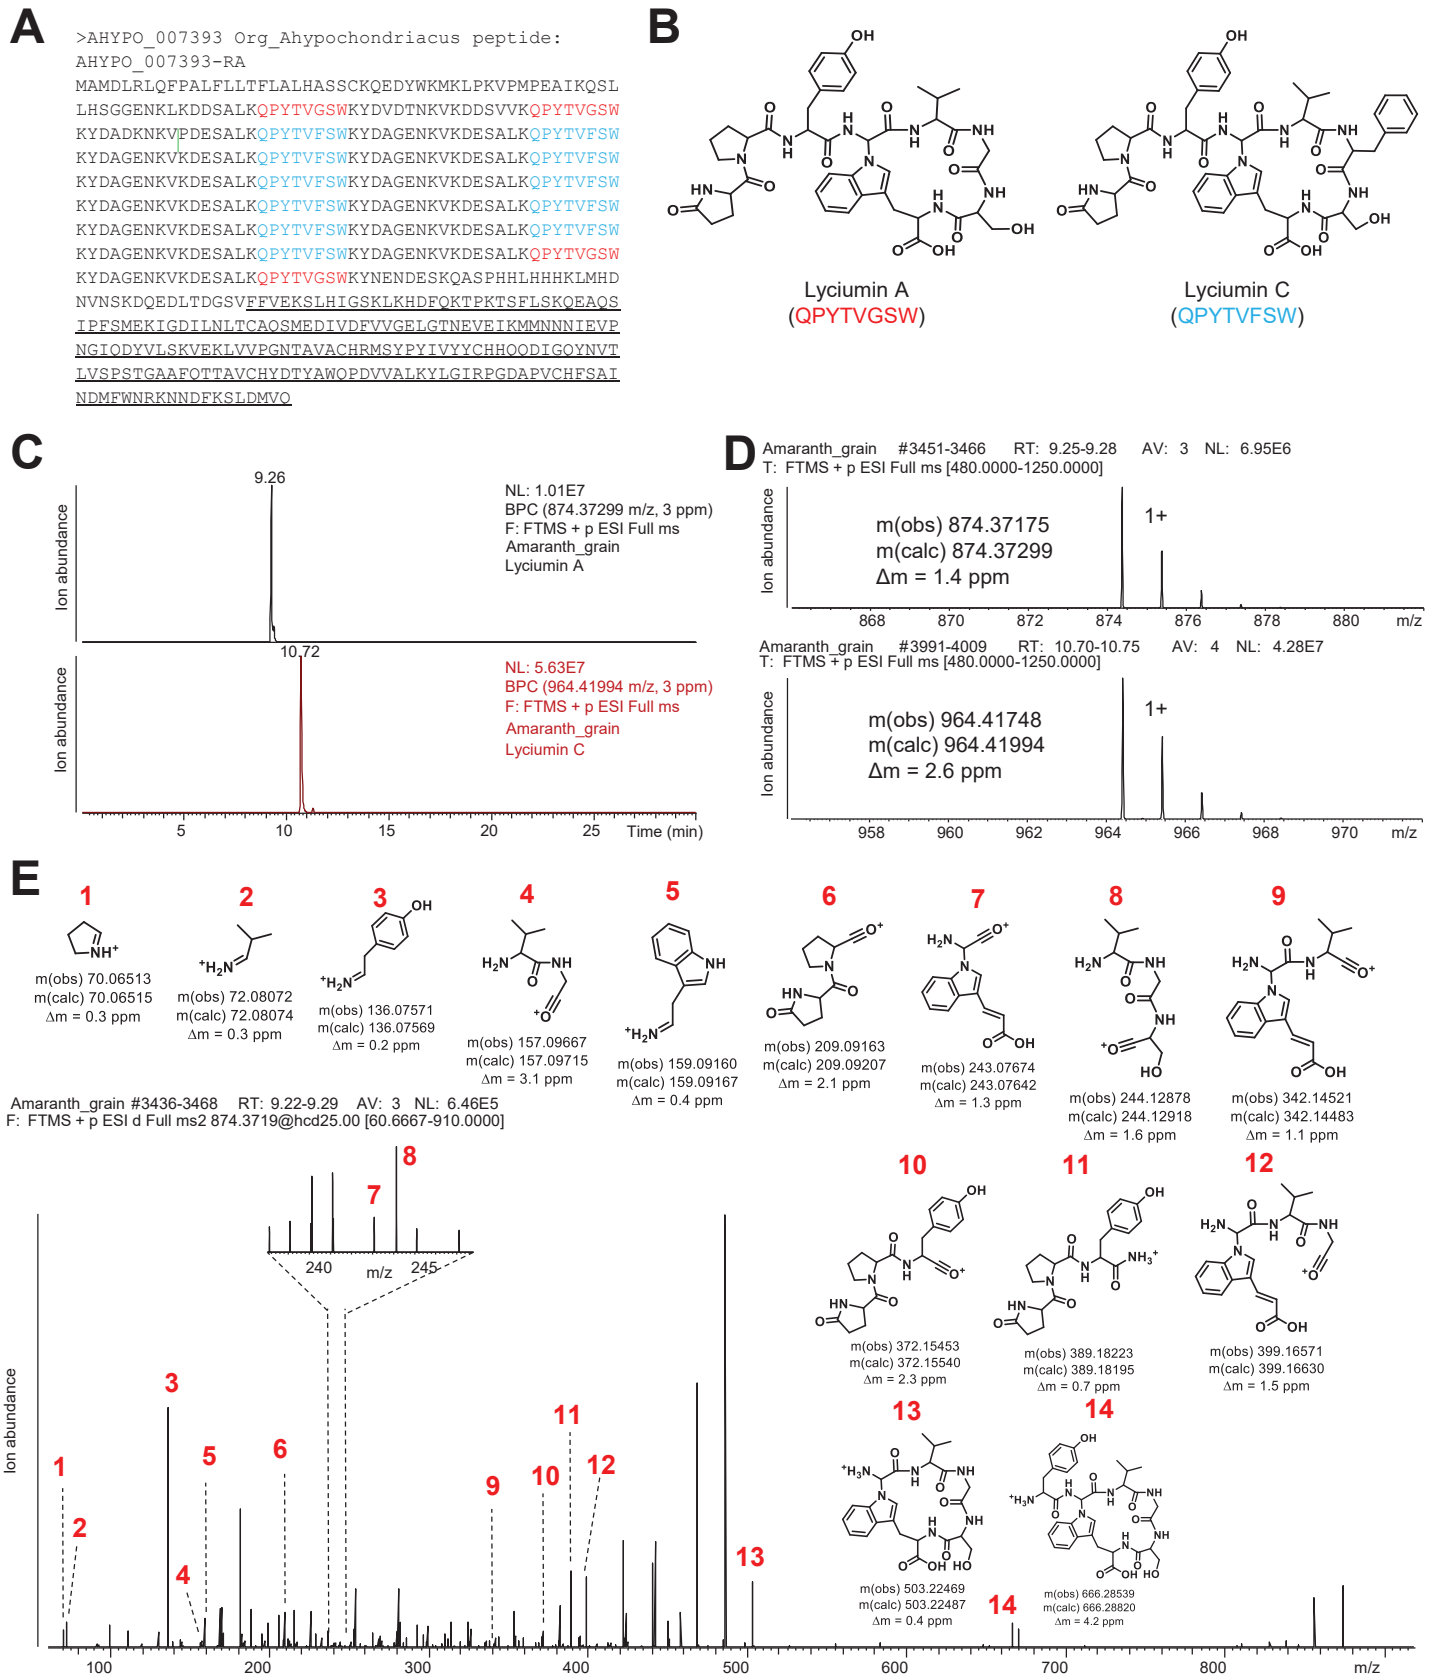

**Figure S11 | Genome mining of lyciumins from *Amaranthus hypochondriacus*.** (A) *Amaranthus hypochondriacus* lyciumin precursor peptide (BURP domain underlined, core peptides highlighted in blue and red). (B) Predicted lyciumin chemotypes. (C) LC-MS chemotyping of predicted lyciumin chemotypes in peptide extract of *Amaranthus hypochondriacus* seeds. (D) MS analysis of predicted lyciumin chemotypes of *Amaranthus hypochondriacus*. (E) MS/MS analysis of predicted lyciumin chemotypes of *Amaranthus hypochondriacus*.

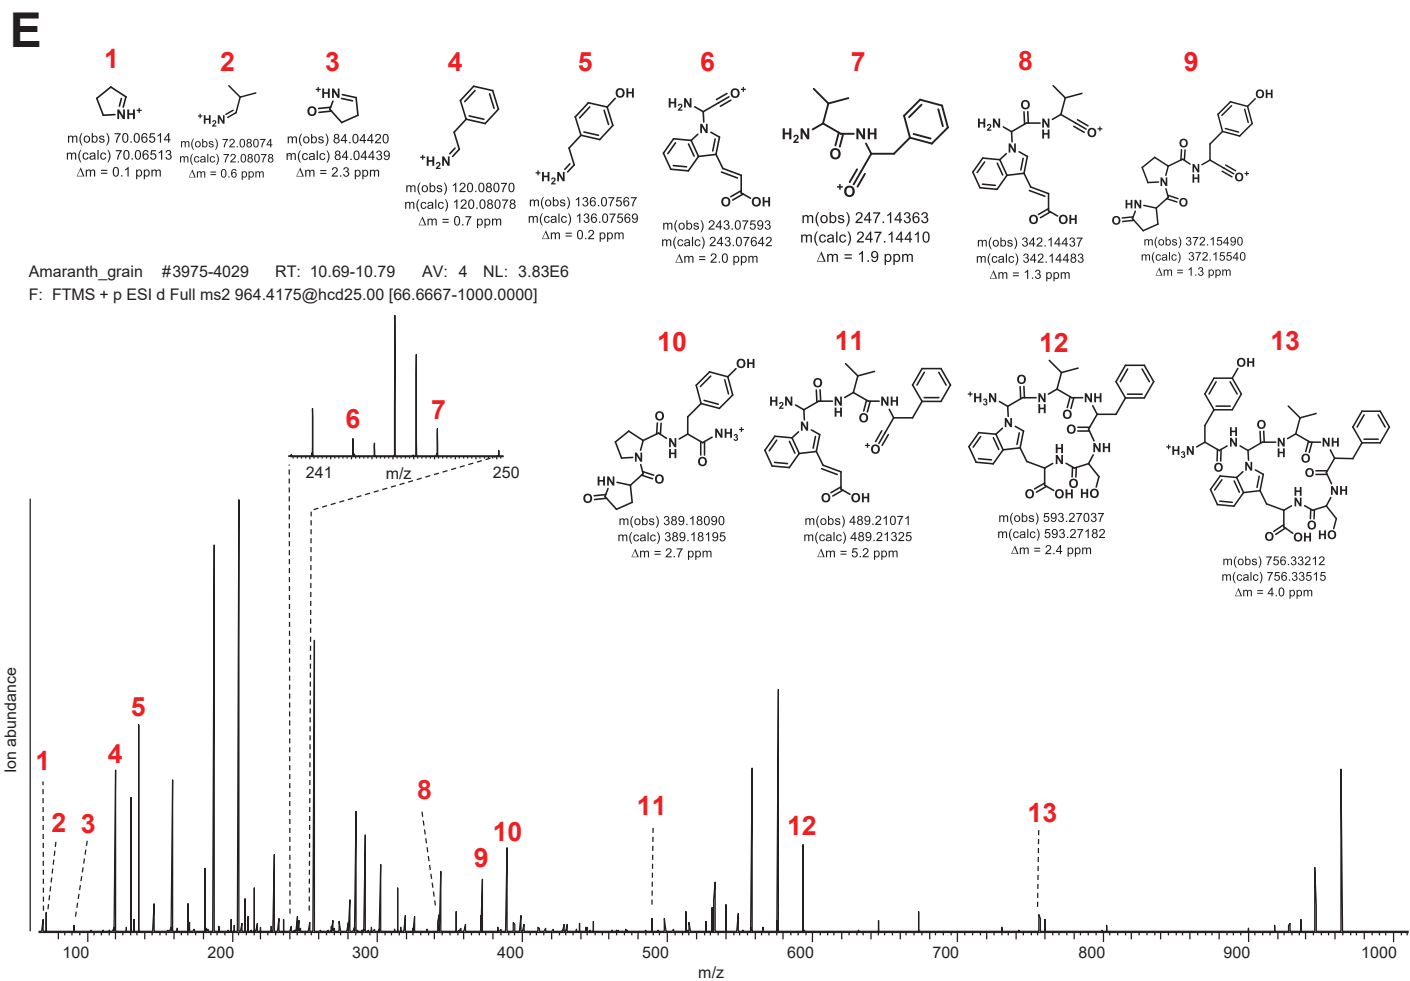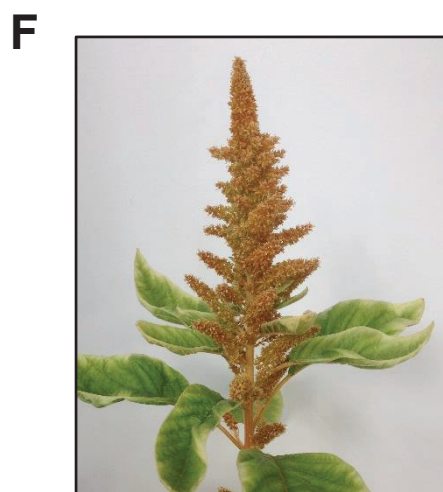

**Figure S11 | Genome mining of lyciumins from *Amaranthus hypochondriacus*. (E) MS/MS analysis of predicted lyciumin chemotypes of *Amaranthus hypochondriacus*. (F) *Amaranthus hypochondriacus* plant.**

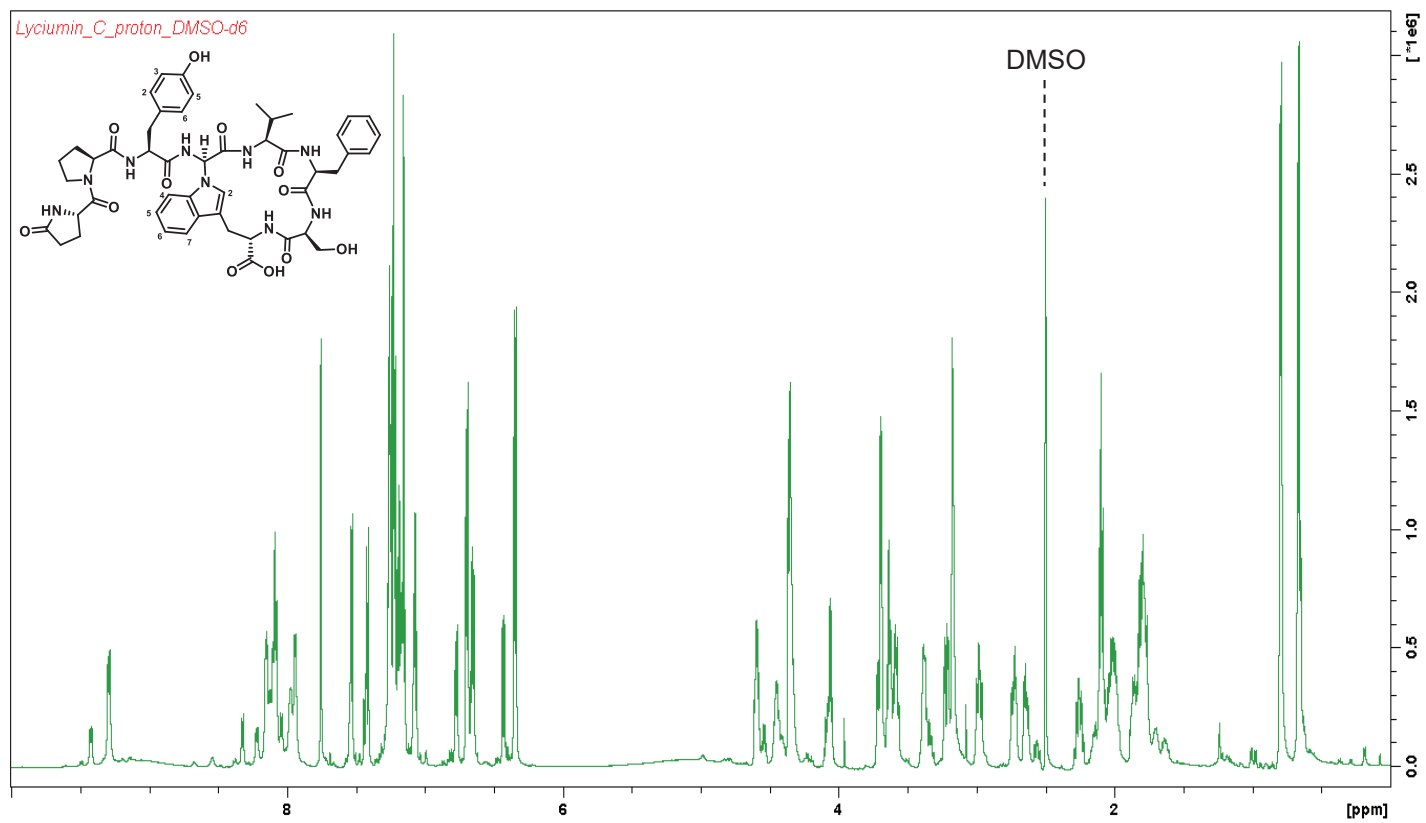

Figure S12 |  $^1\text{H}$  NMR spectrum of lyciumin C in DMSO- $d_6$  (600 MHz).

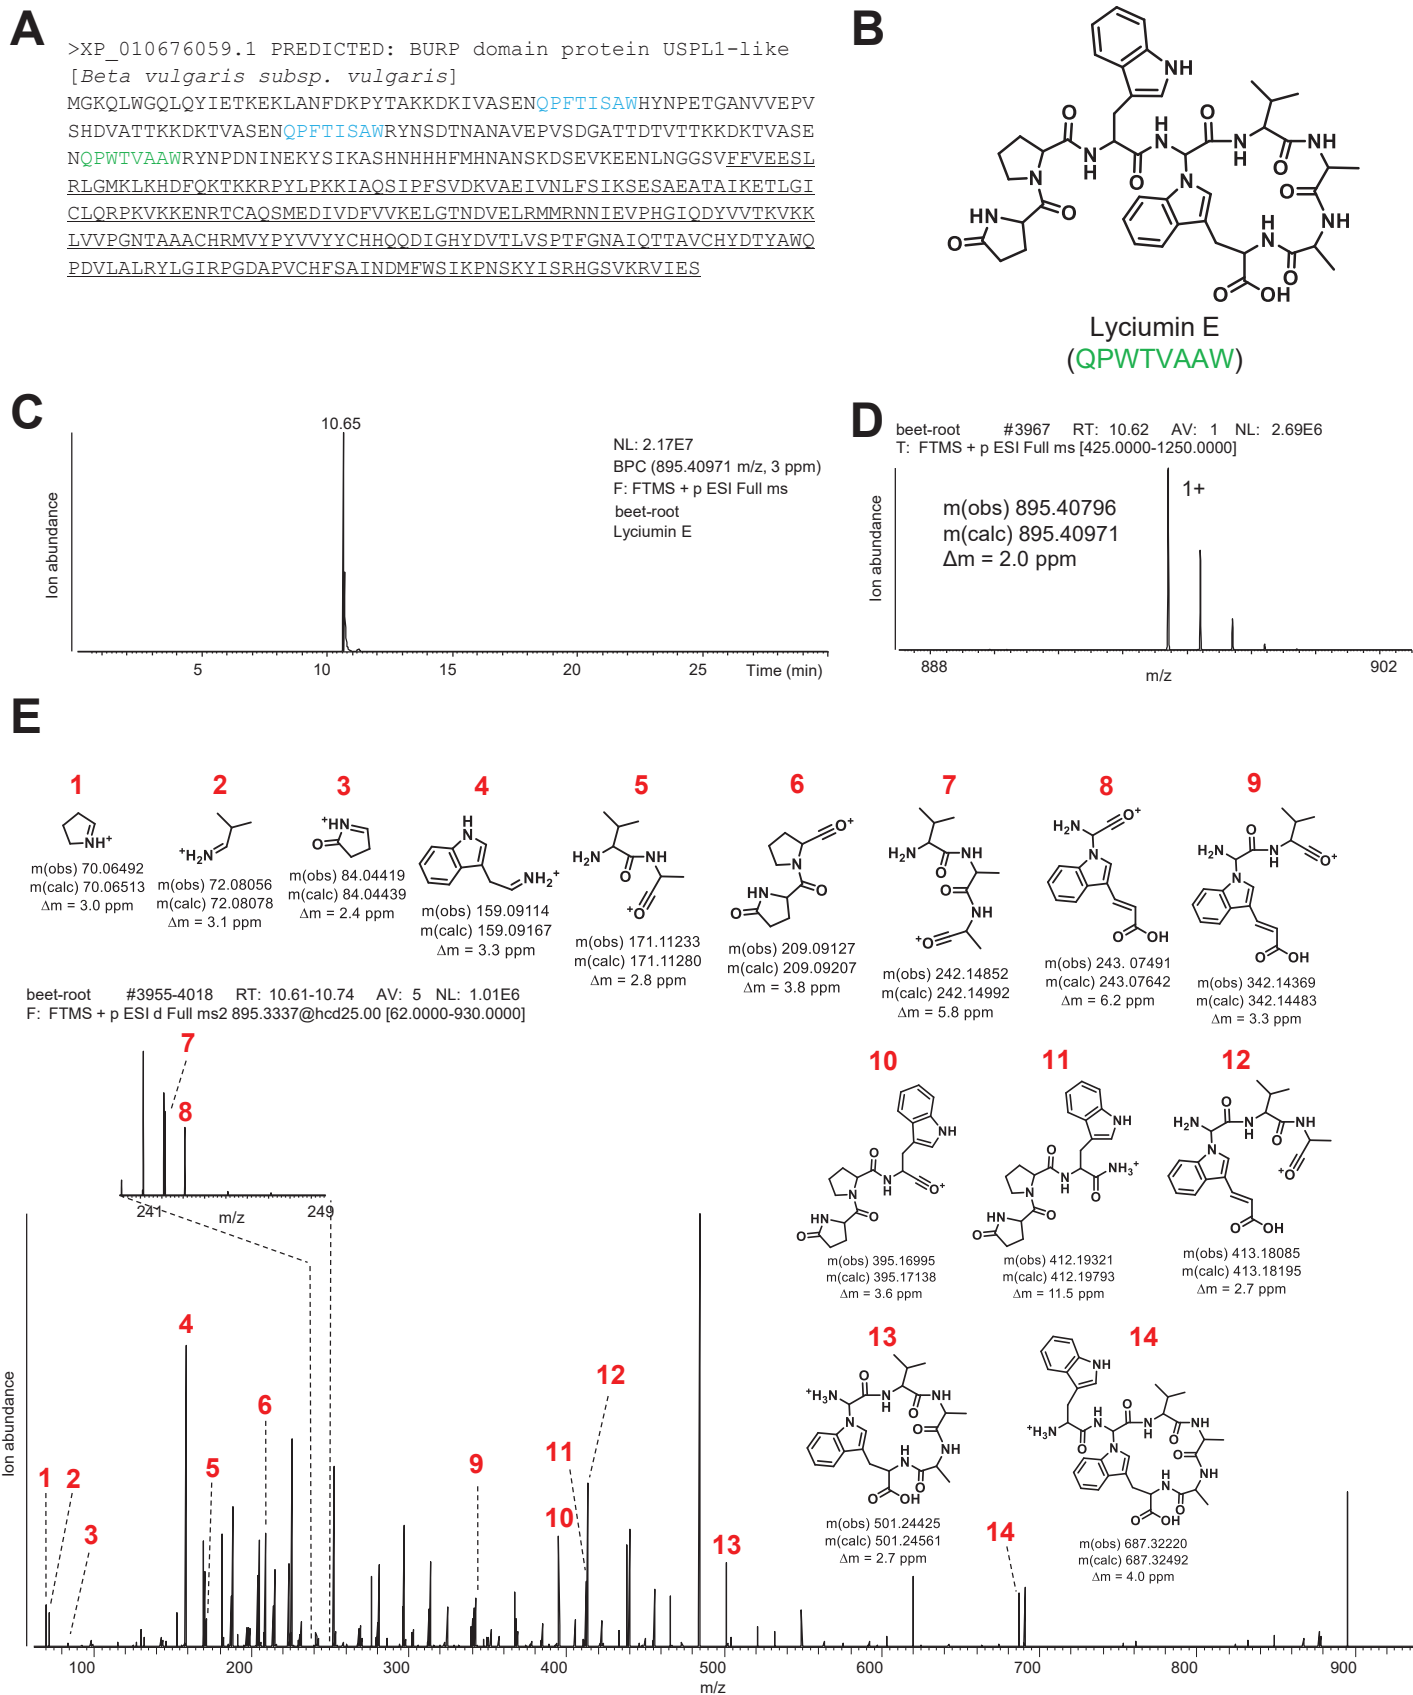

**Figure S13 | Genome mining of lyciumins from *Beta vulgaris*.** (A) *Beta vulgaris* lyciumin precursor peptide (BURP domain underlined, core peptides highlighted in blue and green). (B) Predicted lyciumin chemotype. (C) LC-MS chemotyping of predicted lyciumin chemotype in peptide extract of *Beta vulgaris* root. (D) MS analysis of predicted lyciumin chemotype of *Beta vulgaris*. (E) MS/MS analysis of predicted lyciumin chemotype of *Beta vulgaris*.

**F**

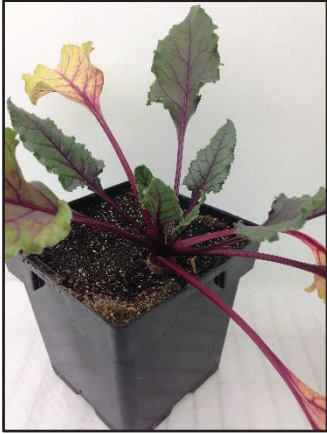

**Figure S13 | Genome mining of lyciumins from *Beta vulgaris*. (F) *Beta vulgaris* plant.**

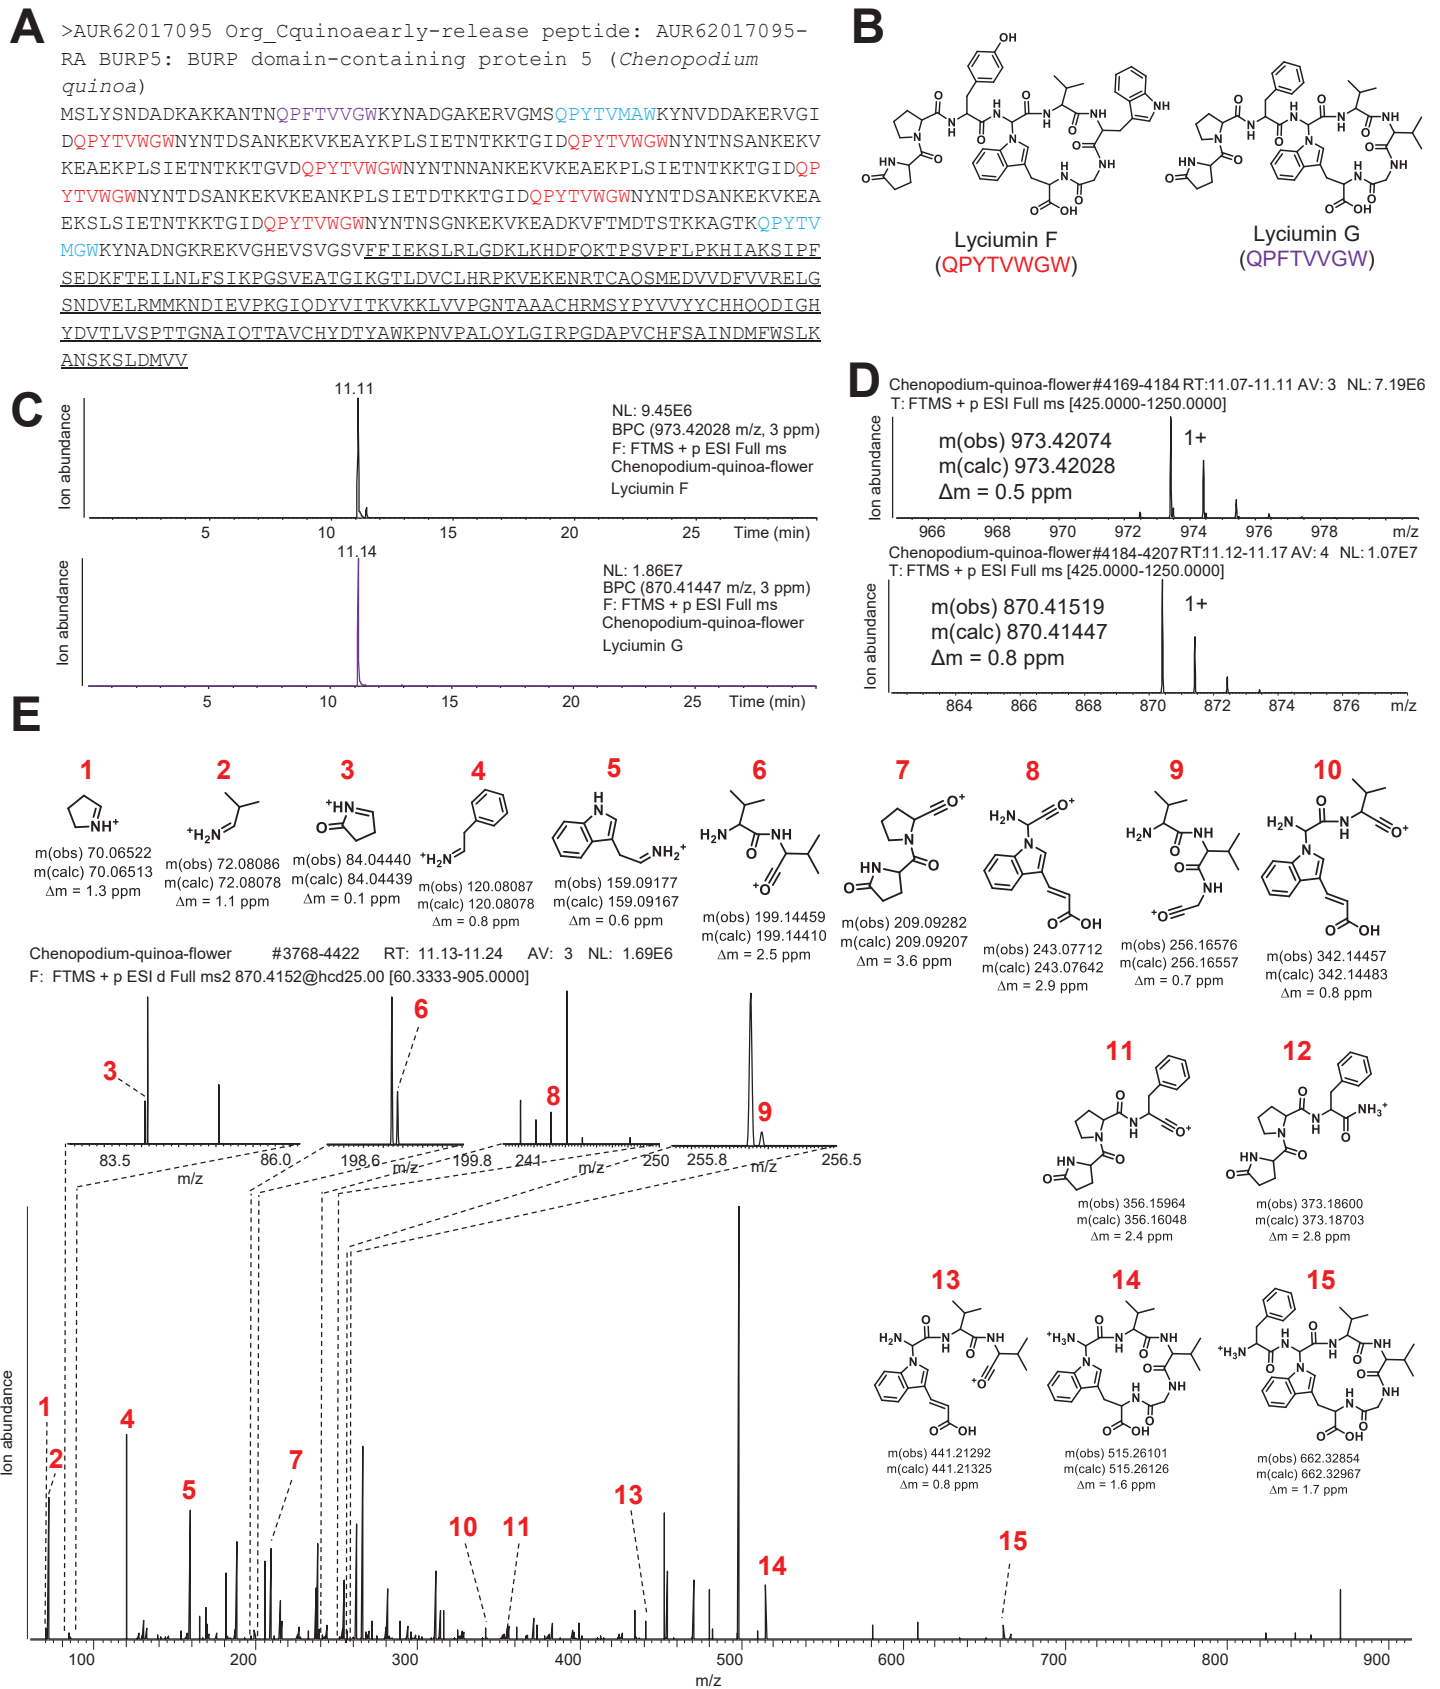

**Figure S14 | Genome mining of lyciumins from *Chenopodium quinoa*.** (A) *Chenopodium quinoa* lyciumin precursor peptide (BURP domain underlined, core peptides highlighted in blue, red and purple). (B) Predicted lyciumin chemotypes. (C) LC-MS chemotyping of predicted lyciumin chemotypes in peptide extract of *Chenopodium quinoa* flower. (D) MS analysis of predicted lyciumin chemotypes of *Chenopodium quinoa*. (E) MS/MS analysis of predicted lyciumin chemotypes of *Chenopodium quinoa*.

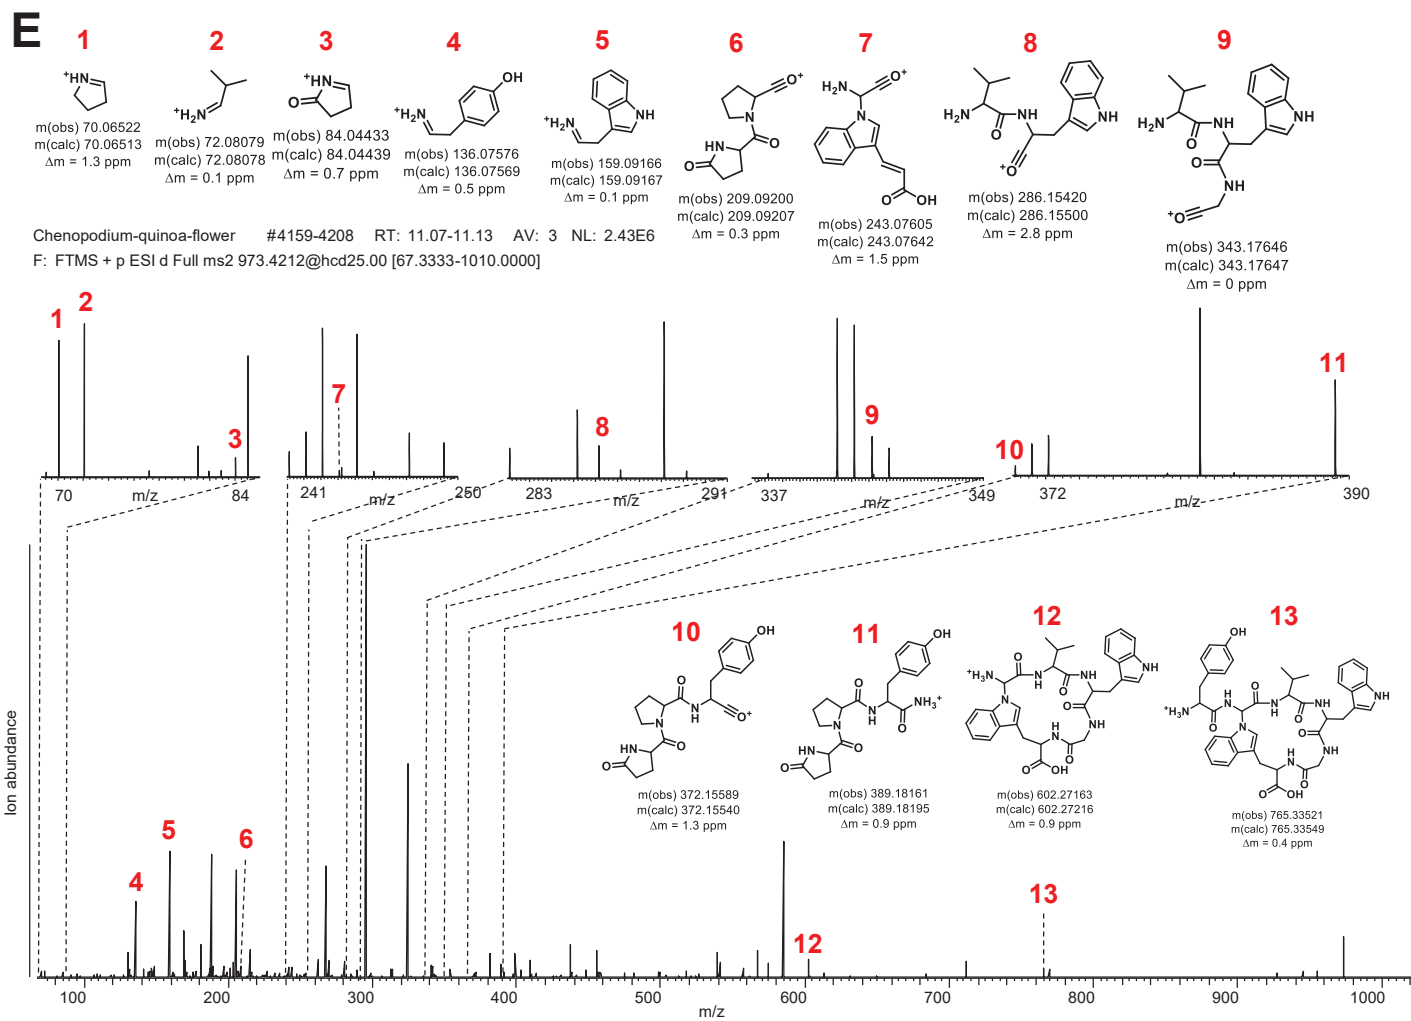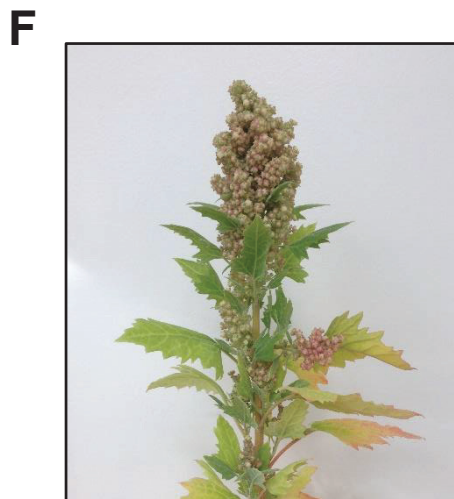

**Figure S14 | Genome mining of lyciumins from *Chenopodium quinoa*.** (E) MS/MS analysis of predicted lyciumin chemotypes of *Chenopodium quinoa*. (F) *Chenopodium quinoa* plant.



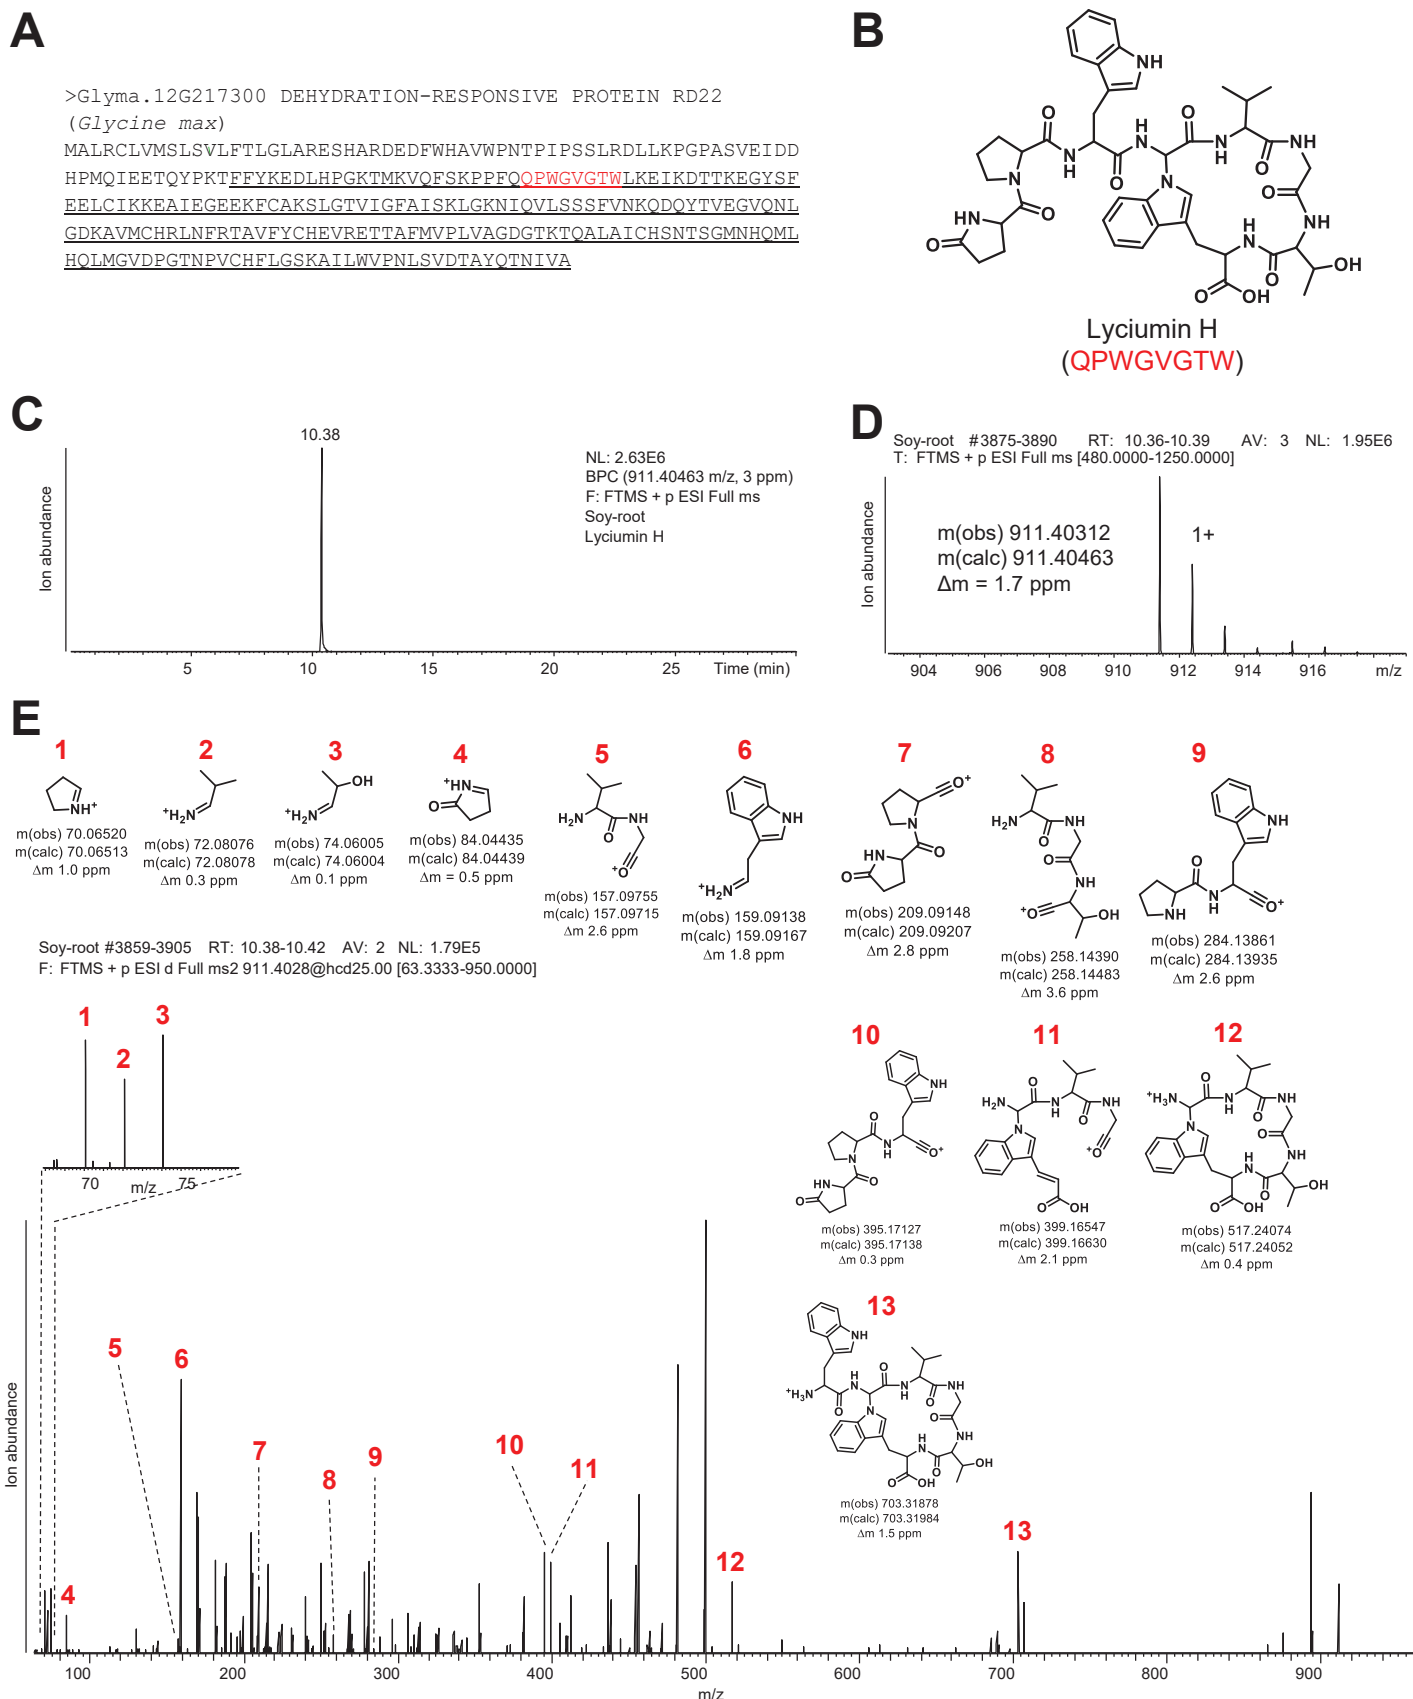

**Figure S15 | Genome mining of lyciumins from *Glycine max*.** (A) *Glycine max* lyciumin H precursor peptide (BURP domain underlined, core peptide highlighted in red). (B) Predicted lyciumin H chemotype. (C) LC-MS chemotyping of predicted lyciumin H chemotype in peptide extract of *Glycine max* root. (D) MS analysis of predicted lyciumin H chemotype of *Glycine max* root. (E) MS/MS analysis of predicted lyciumin H chemotype of *Glycine max* root.

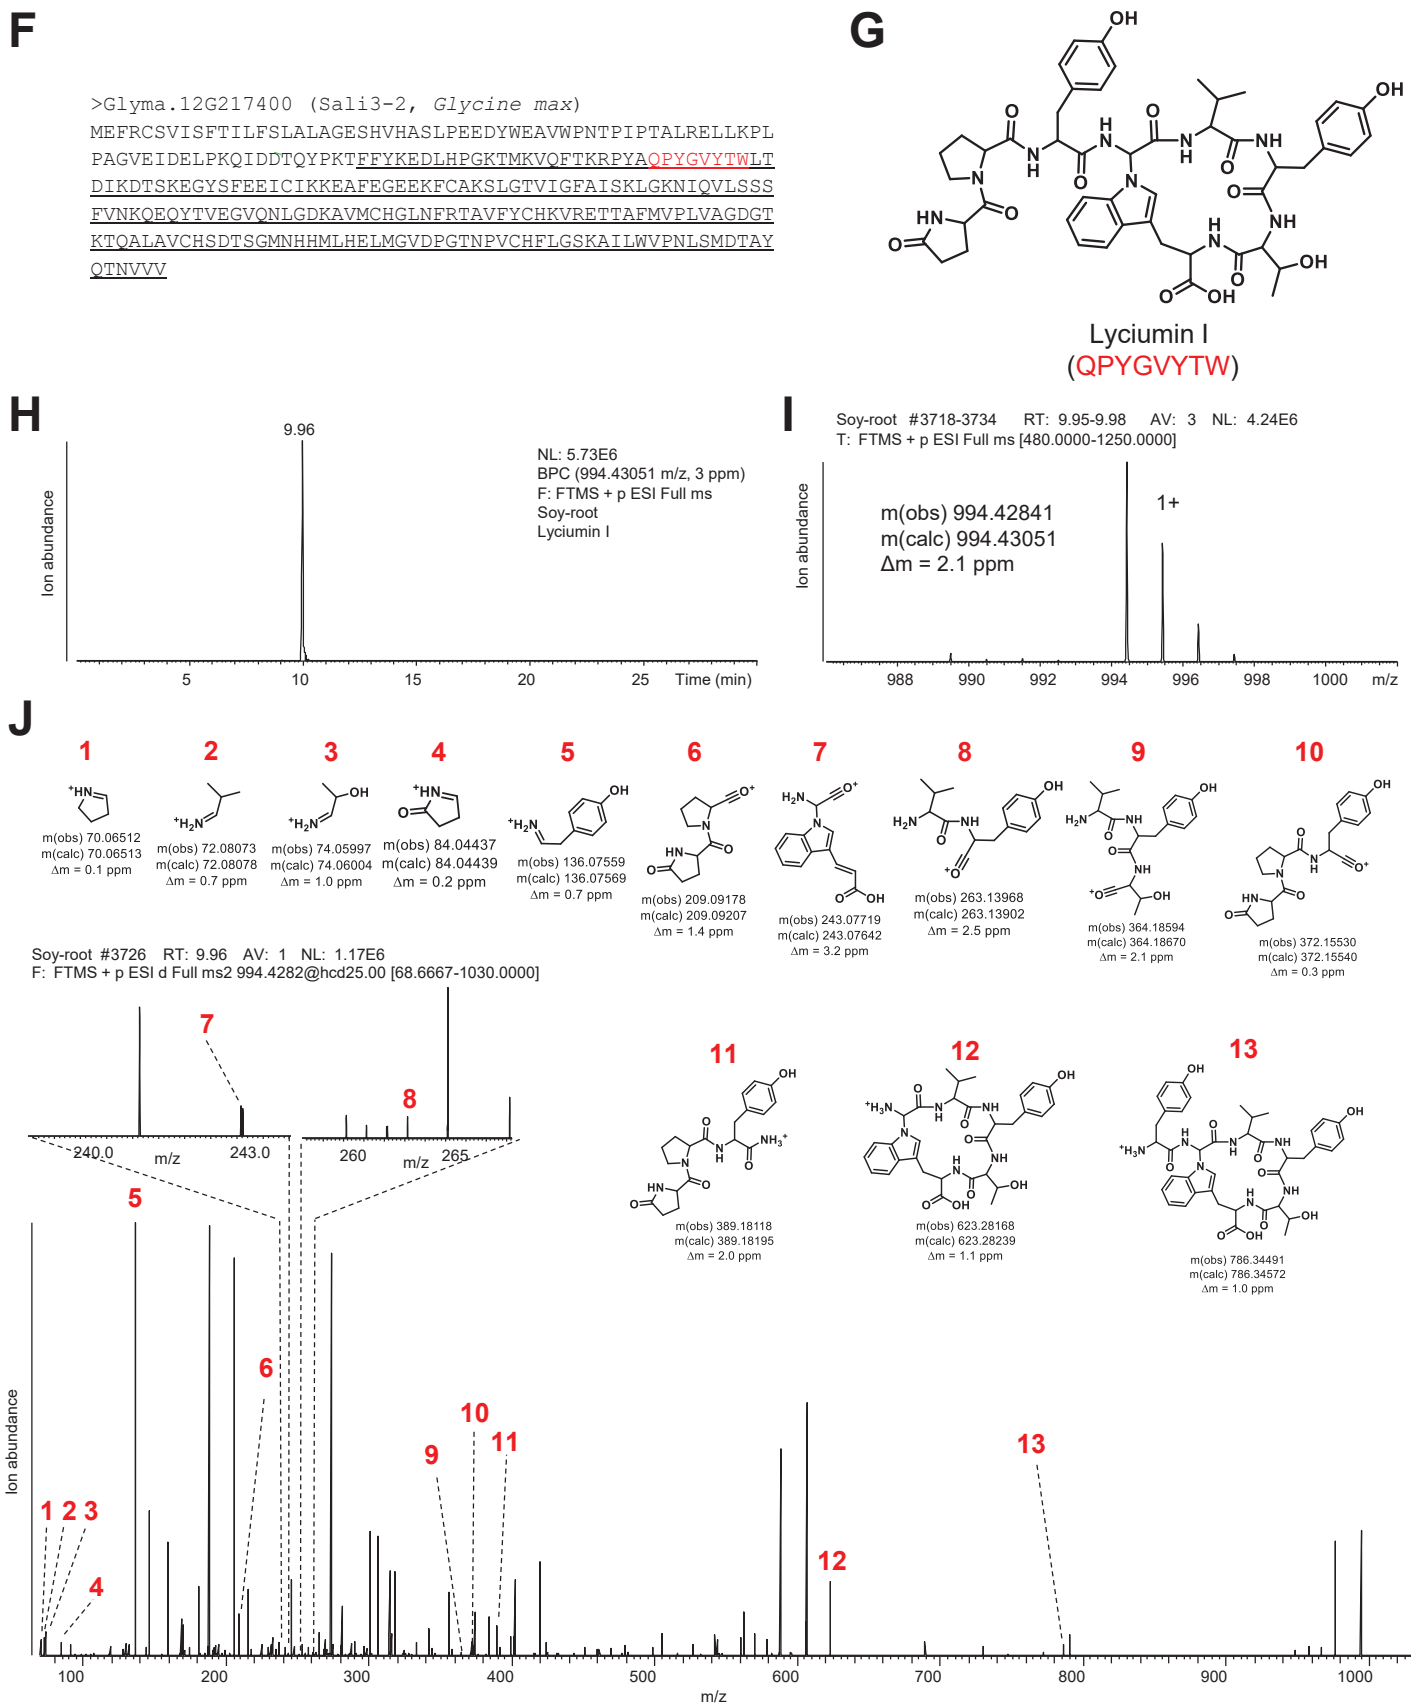

**Figure S15 | Genome mining of lyciumins from *Glycine max*.** (F) *Glycine max* lyciumin I precursor peptide (BURP domain underlined, core peptide highlighted in red). (G) Predicted lyciumin I chemotype. (H) LC-MS chemotyping of predicted lyciumin I chemotype in peptide extract of *Glycine max* root. (I) MS analysis of predicted lyciumin I chemotype of *Glycine max* root. (J) MS/MS analysis of predicted lyciumin I chemotype of *Glycine max* root.

**K**

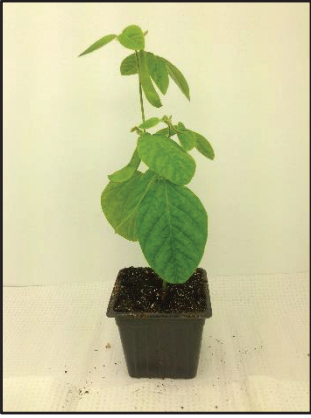

**Figure S15 | Genome mining of lyciumins from *Glycine max*. (K) *Glycine max* plant.**

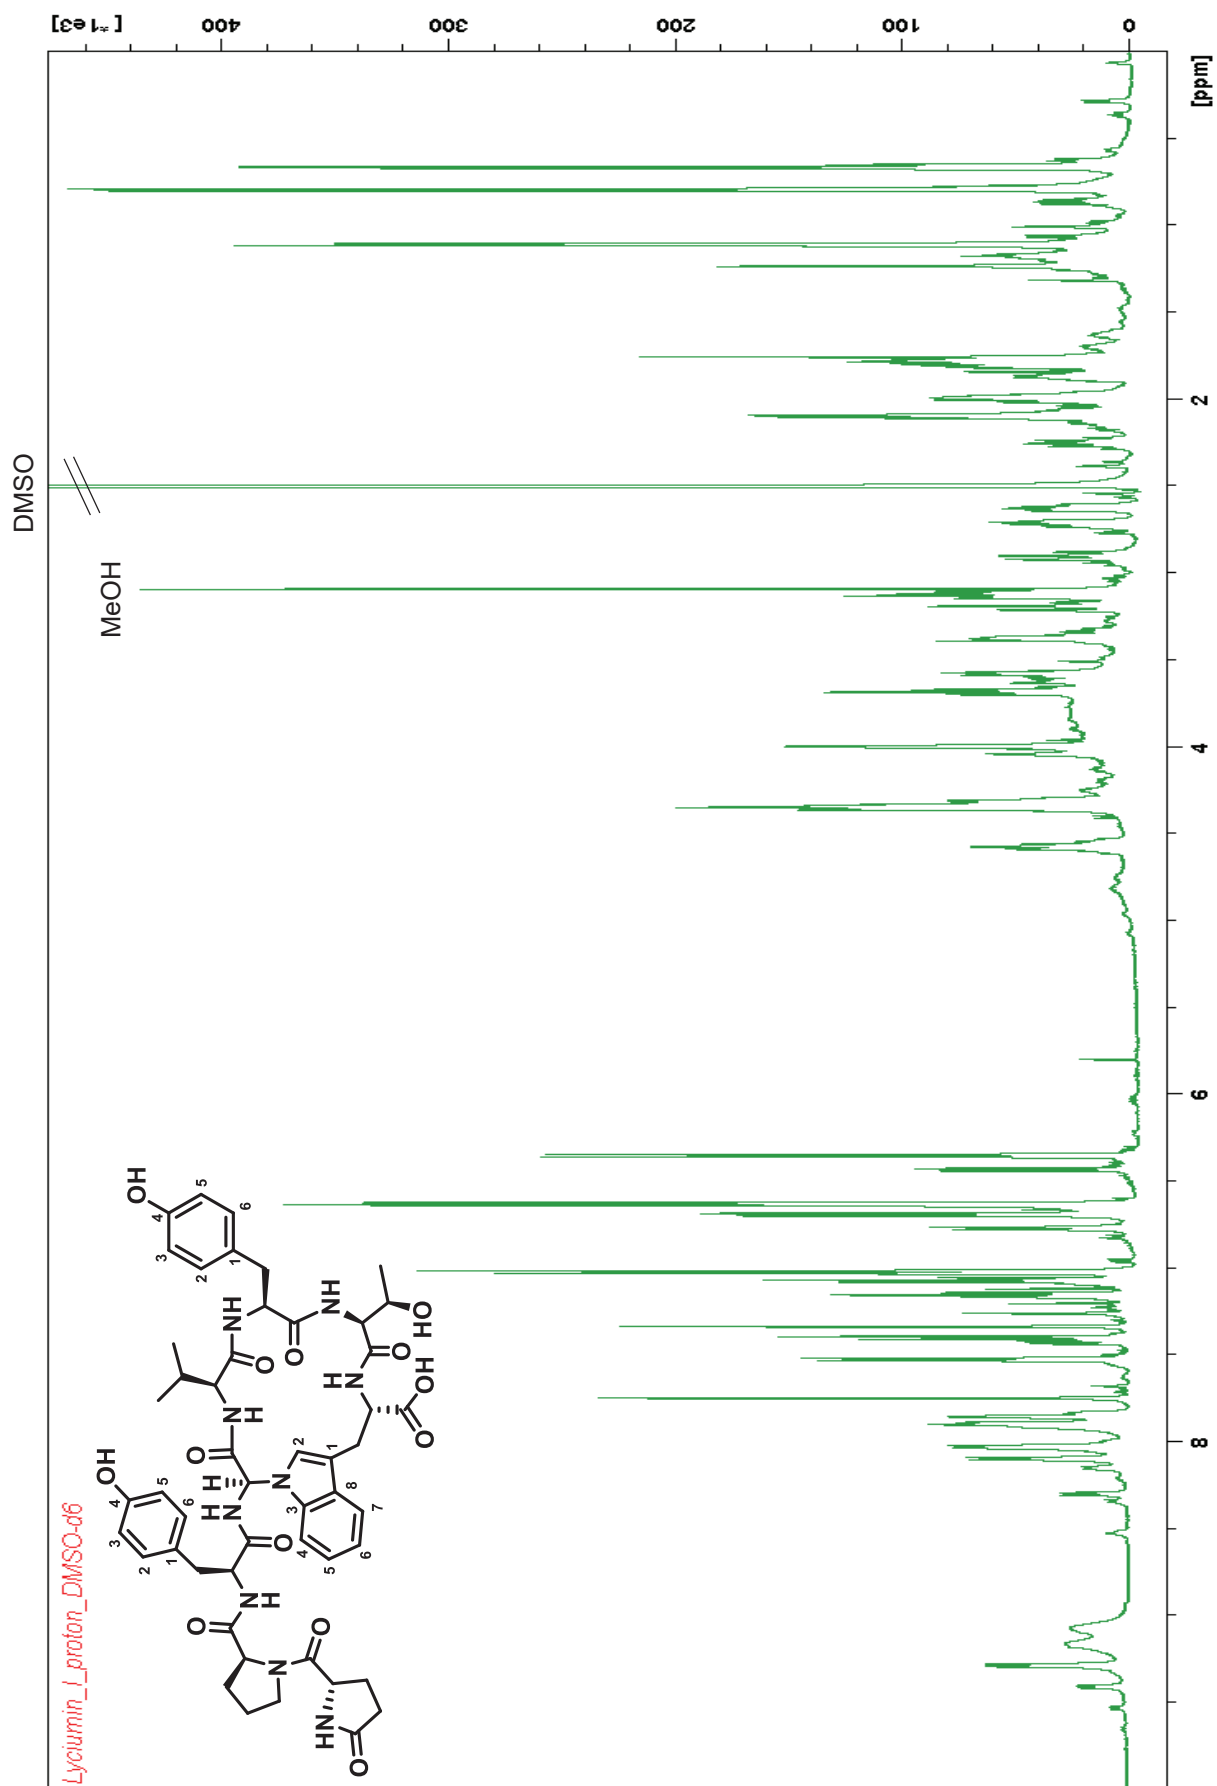

Figure S16 | <sup>1</sup>H NMR spectrum of lyciumin I in DMSO-d<sub>6</sub> (600 MHz).

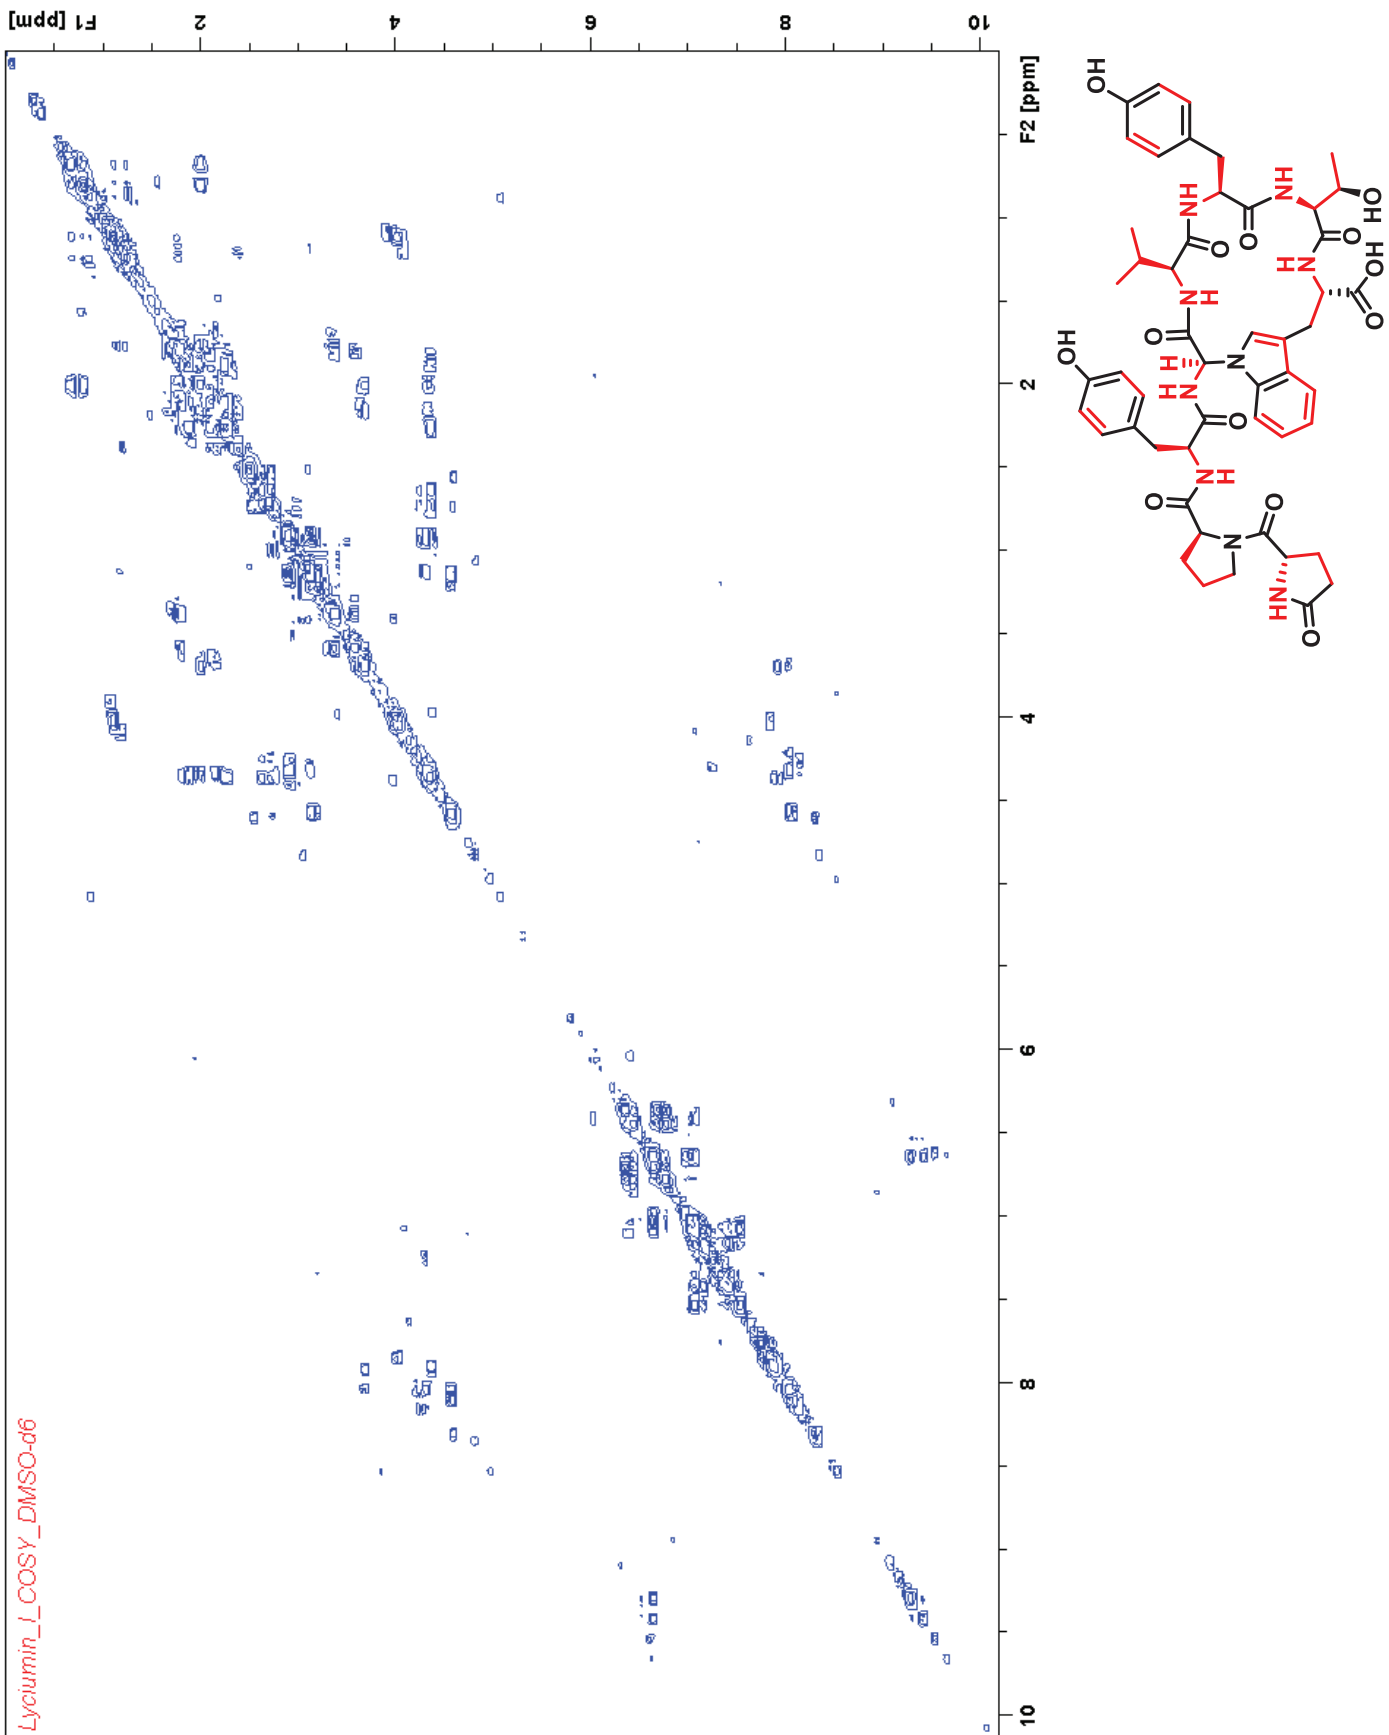

Figure S17 |  $^1\text{H}$ - $^1\text{H}$  COSY NMR spectrum of lyciumin I in DMSO- $d_6$  (600 MHz).

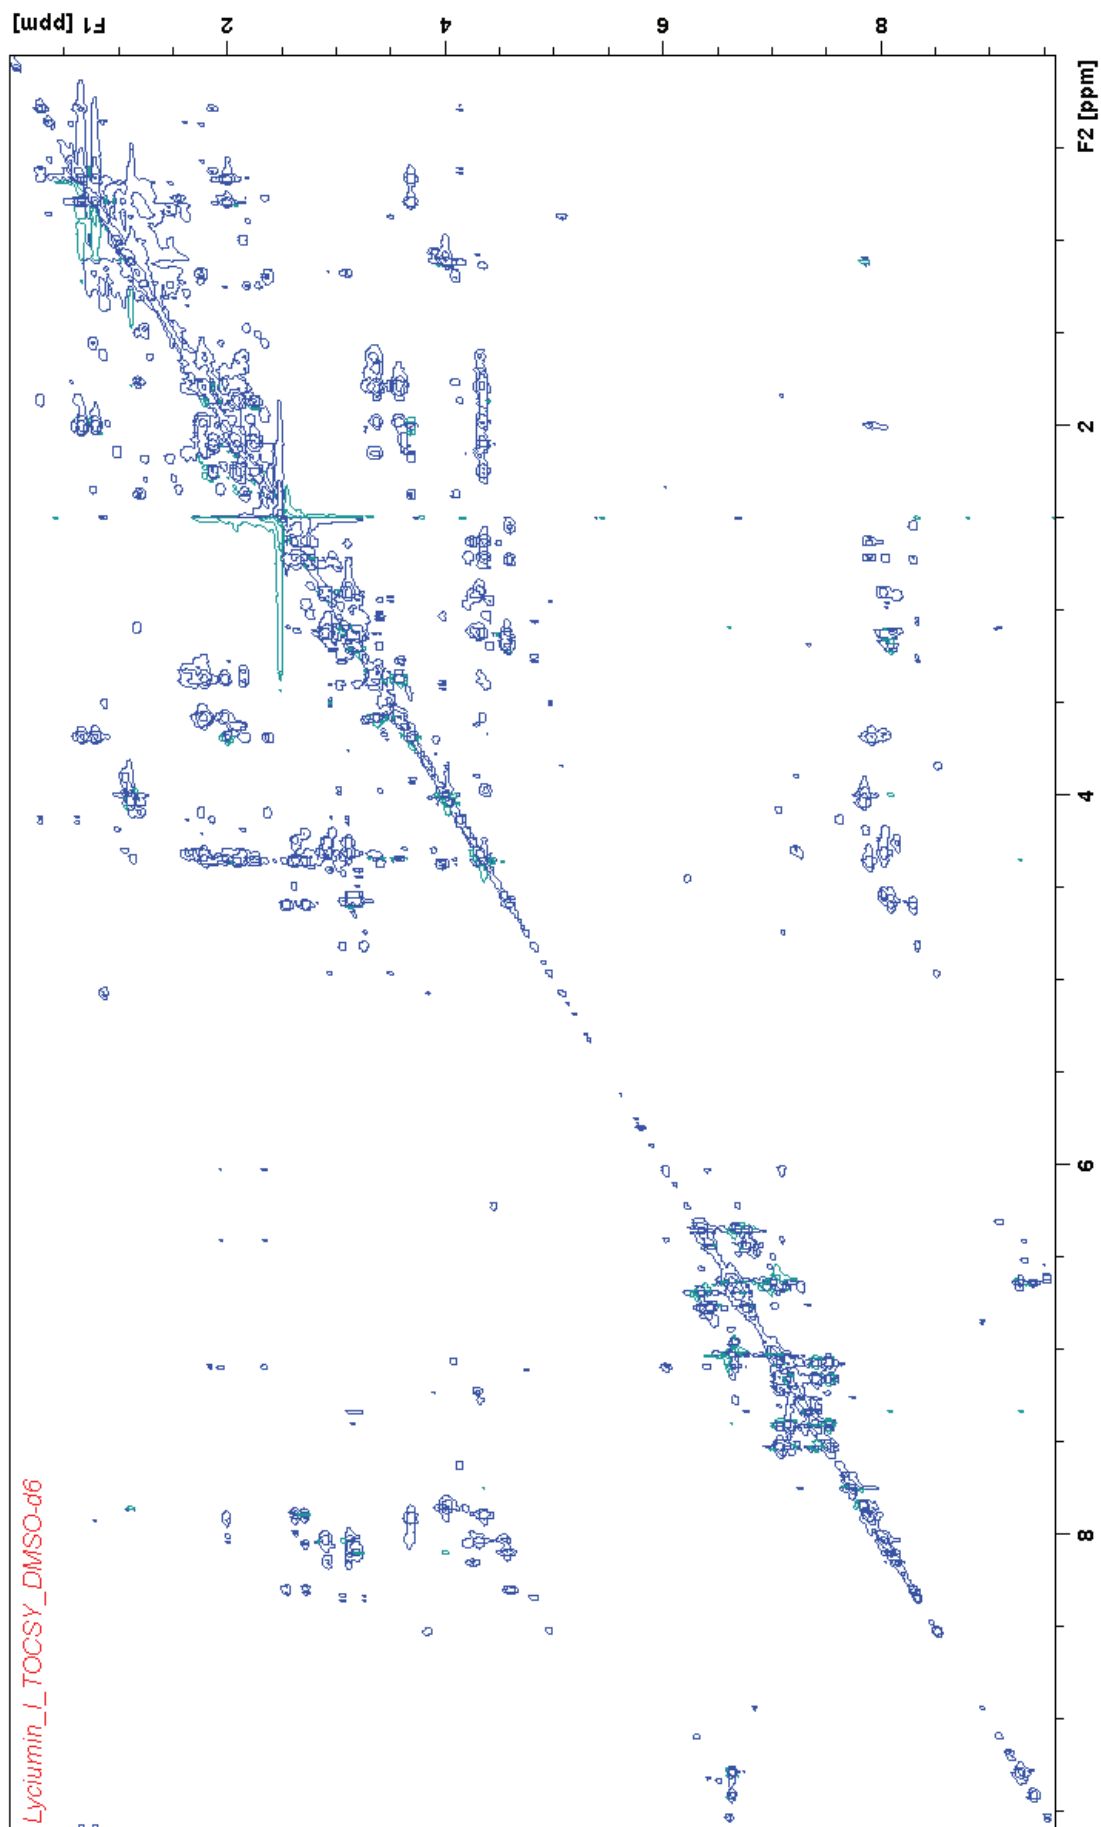

Figure S18 |  $^1\text{H}$ - $^1\text{H}$  TOCSY NMR spectrum of lyciumin I in DMSO- $d_6$  (600 MHz).

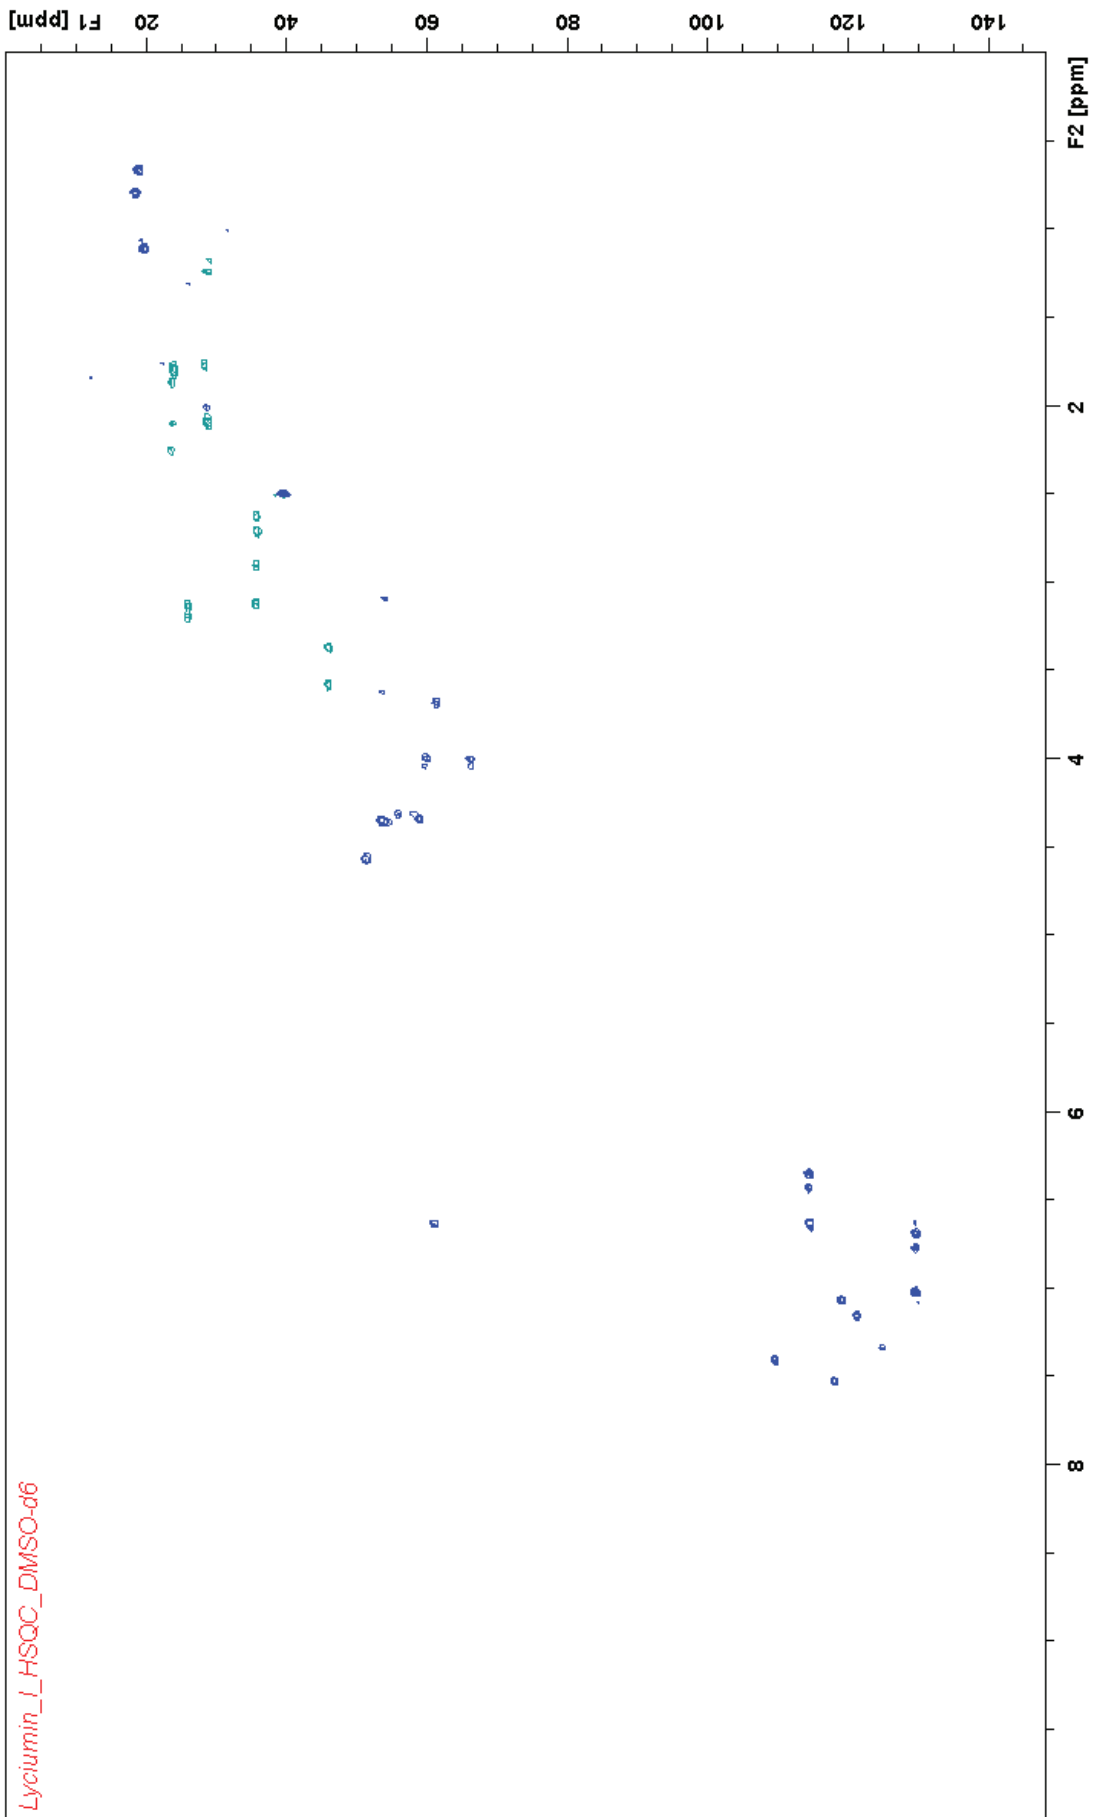

Figure S19 |  $^1\text{H}$ - $^{13}\text{C}$  HSQC NMR spectrum of lyciumin I in DMSO- $d_6$  (600 MHz).

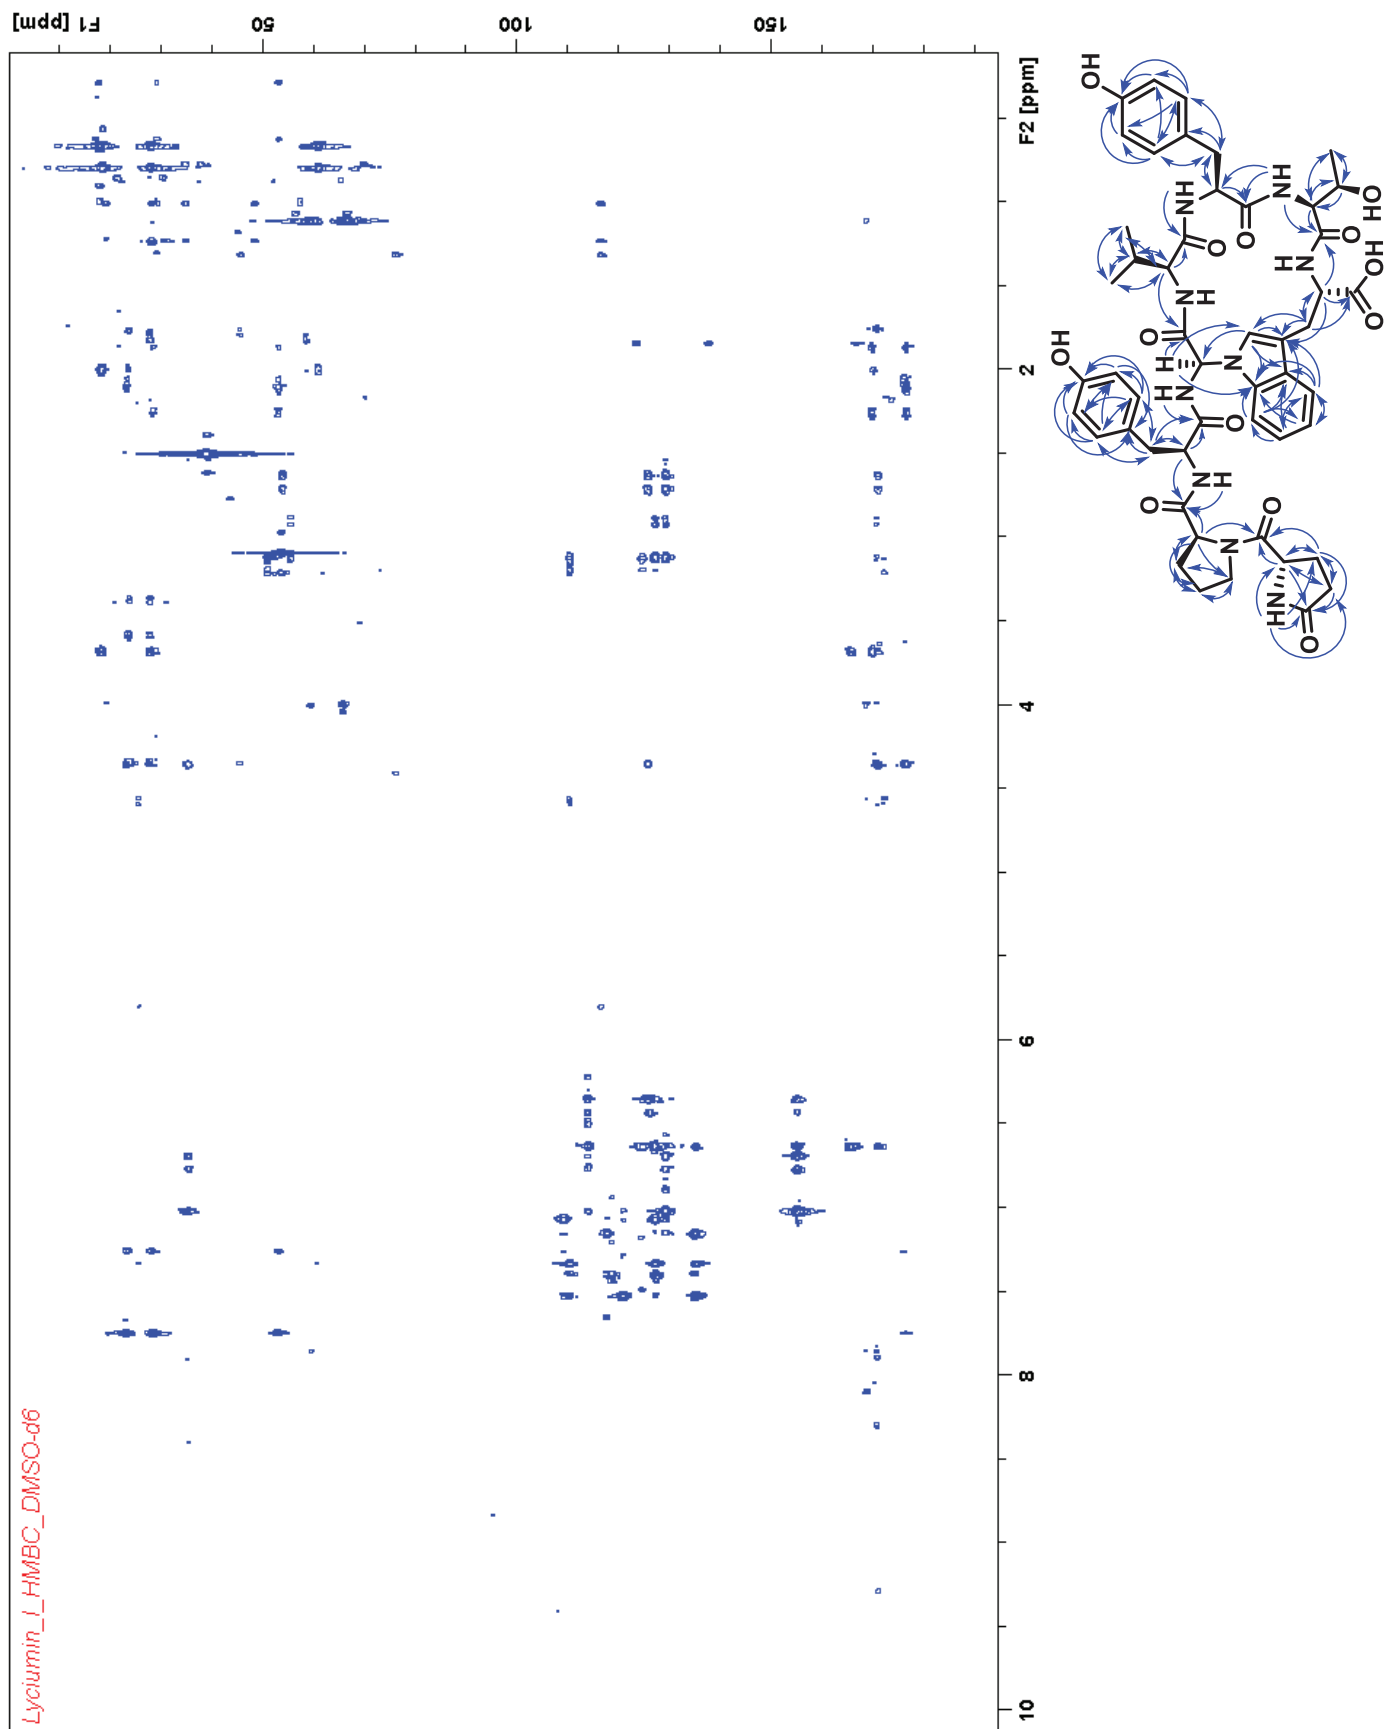

Figure S20 |  $^1\text{H}$ - $^{13}\text{C}$  HMBC NMR spectrum of lyciumin I in DMSO- $d_6$  (600 MHz).



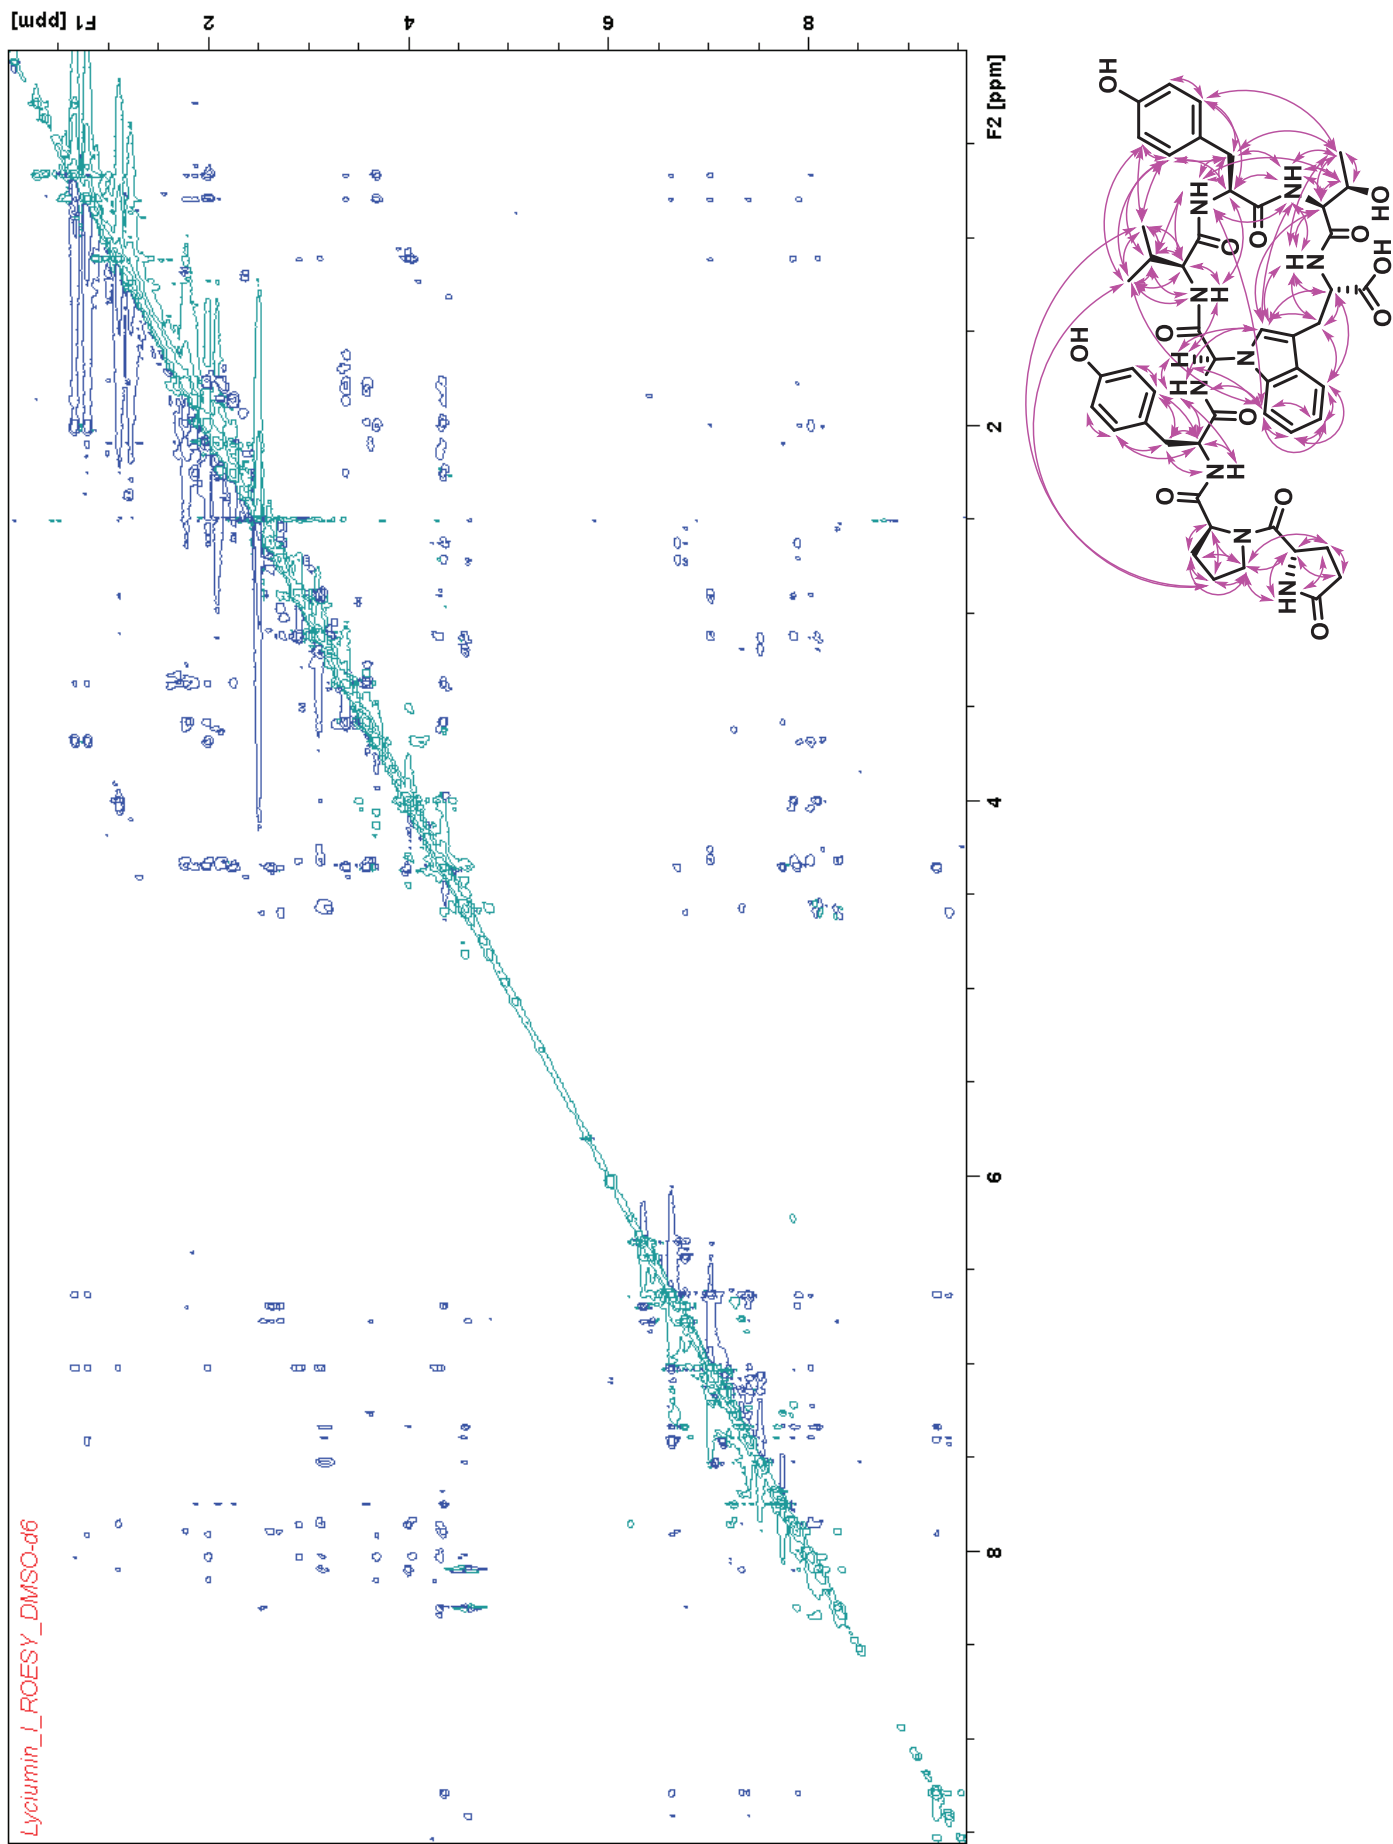

Figure S21 |  $^1\text{H}$ - $^1\text{H}$  ROESY NMR spectrum of lyciumin I in  $\text{DMSO-d}_6$  (600 MHz).

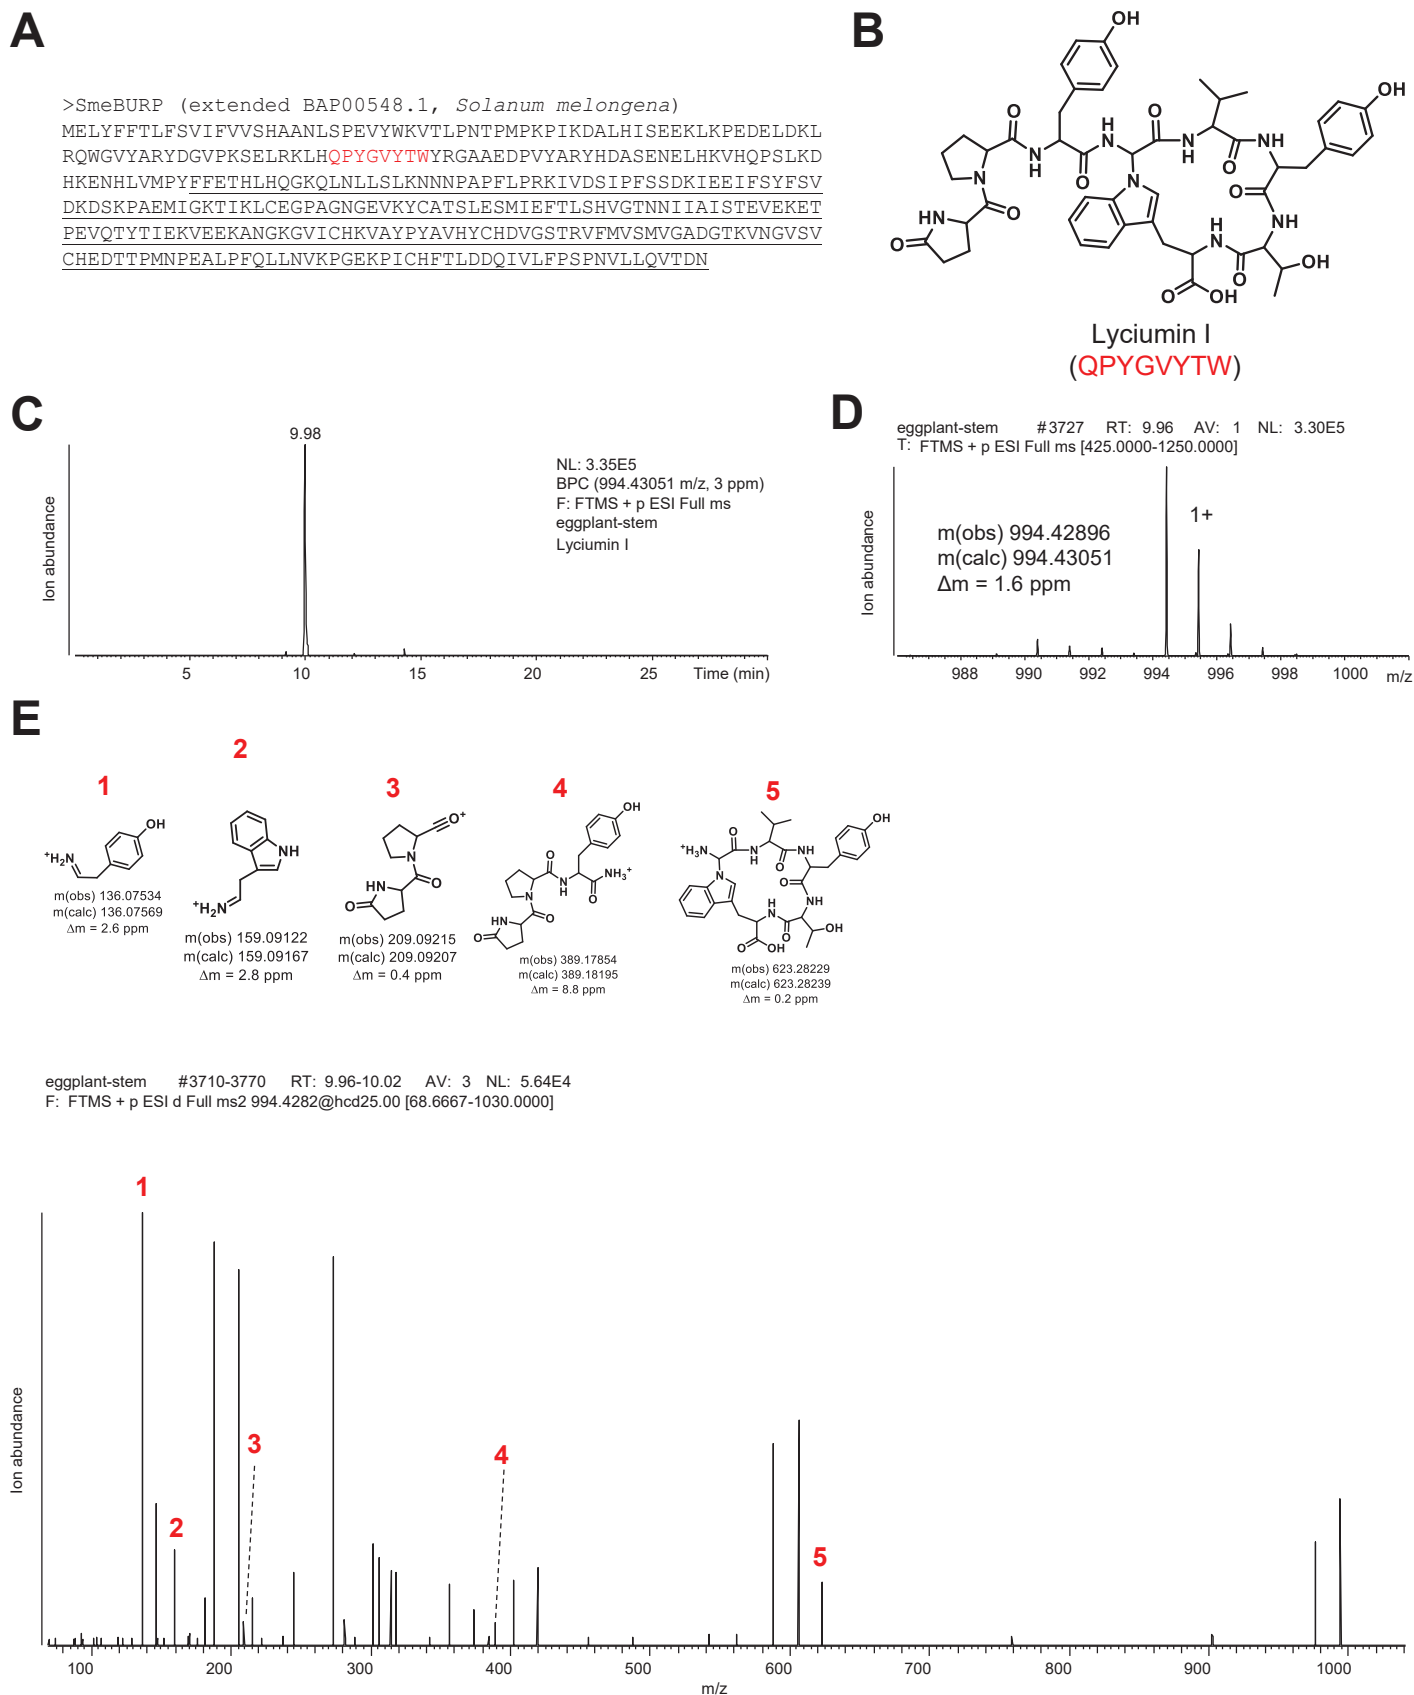

**Figure S22 | Genome mining of lyciumins from *Solanum melongena*.** (A) *Solanum melongena* lyciumin I precursor peptide (BURP domain underlined, core peptide highlighted in red). (B) Predicted lyciumin I chemotype. (C) LC-MS chemotyping of predicted lyciumin I chemotype in peptide extract of *Solanum melongena* stem. (D) MS analysis of predicted lyciumin I chemotype of *Solanum melongena* stem. (E) MS/MS analysis of predicted lyciumin I chemotype of *Solanum melongena* stem.

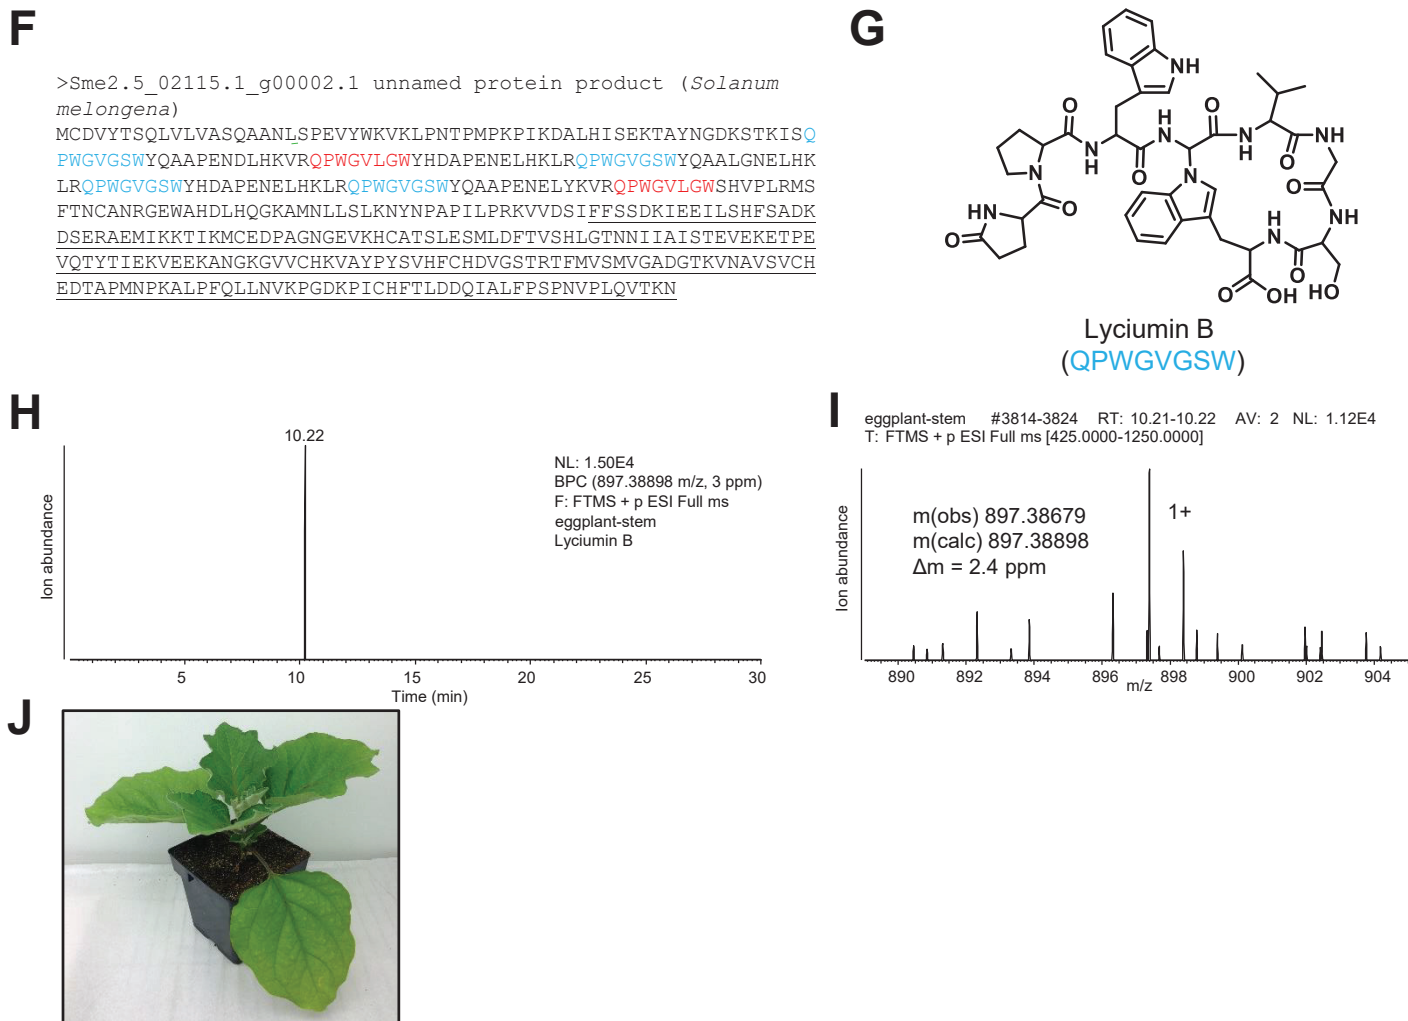

**Figure S22 | Genome mining of lyciumins from *Solanum melongena*.** (F) *Solanum melongena* lyciumin B precursor peptide (BURP domain underlined, core peptides highlighted in blue and red). (G) Predicted lyciumin B chemotype. (H) LC-MS chemotyping of predicted lyciumin B chemotype in peptide extract of *Solanum melongena* stem. (I) MS analysis of predicted lyciumin B chemotype of *Solanum melongena* stem. (J) *Solanum melongena* plant.

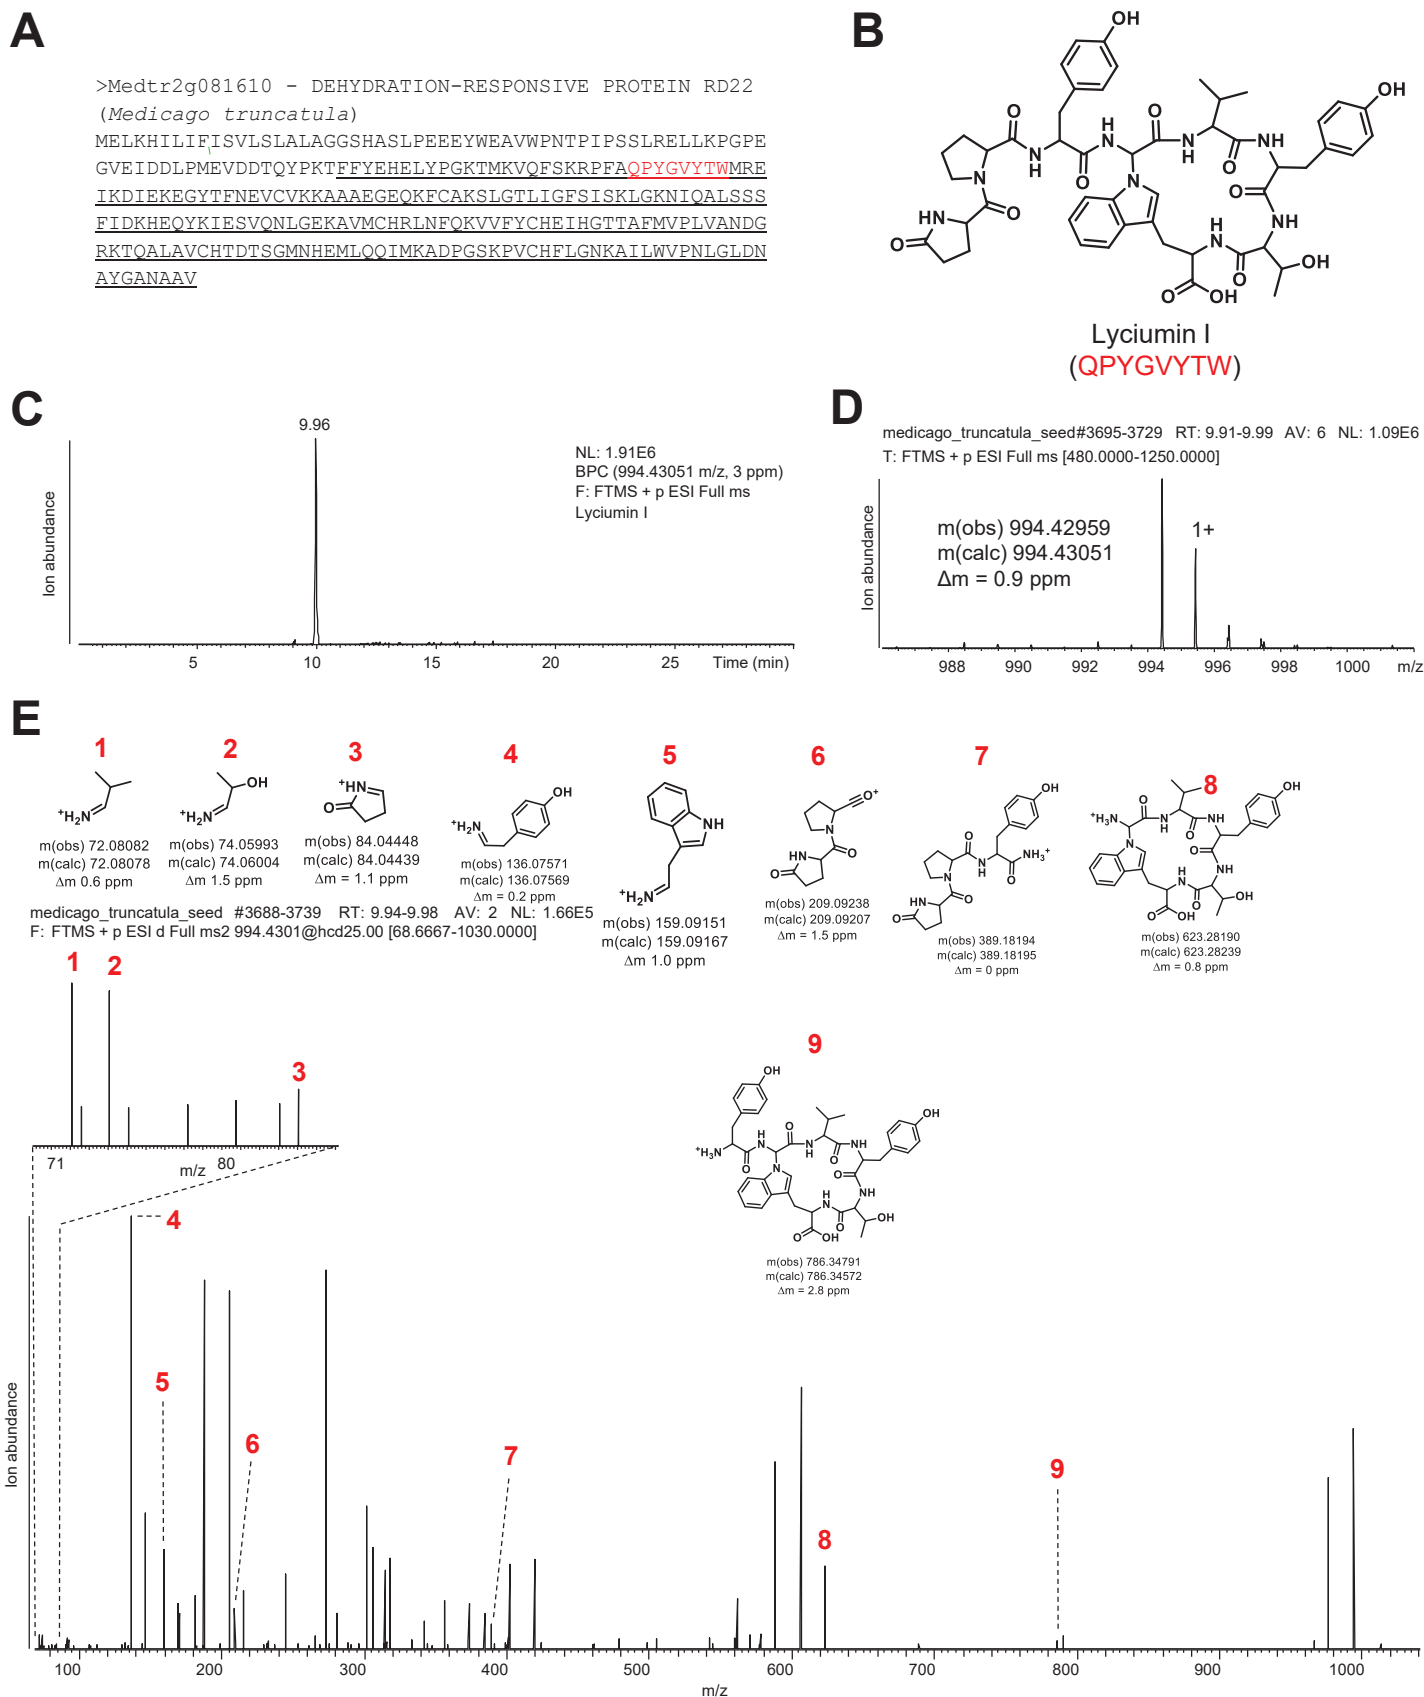

**Figure S23 | Genome mining of lyciumins from *Medicago truncatula*.** (A) *Medicago truncatula* lyciumin I precursor peptide (BURP domain underlined, core peptide highlighted in red). (B) Predicted lyciumin I chemotype. (C) LC-MS chemotyping of predicted lyciumin I chemotype in peptide extract of *Medicago truncatula* seeds. (D) MS analysis of predicted lyciumin I chemotype of *Medicago truncatula* seeds. (E) MS/MS analysis of predicted lyciumin I chemotype of *Medicago truncatula* seeds.

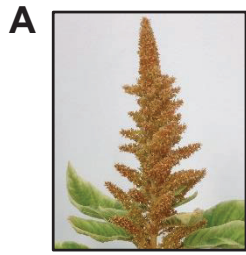

*Amaranthus hypochondriacus*

| Gene expression (RSEM, [TPM]) in tissues/conditions |                    |            |                   |            |            |             |            |            |            |
|-----------------------------------------------------|--------------------|------------|-------------------|------------|------------|-------------|------------|------------|------------|
| Transcript                                          | Lyciumin chemotype | Cotyledon  | Developing embryo | Drought    | Leaf       | Mature seed | Root       | Stem       | Flower     |
| AHYPO_007393-RA                                     | Lyciumin A & C     | 37338      | 2055              | 60460      | 7236       | 66366       | 77877      | 15572      | 13250      |
|                                                     | References (SRA)   | SRR1598915 | SRR1598909        | SRR1598914 | SRR1598912 | SRR1598916  | SRR1598913 | SRR1598910 | SRR1598911 |

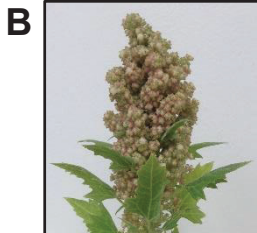

*Chenopodium quinoa*

| Gene expression (RSEM, [TPM]) in tissues/conditions |                    |          |            |          |            |            |            |          |            |        |            |            |            |            |            |            |            |            |            |        |            |        |            |        |            |
|-----------------------------------------------------|--------------------|----------|------------|----------|------------|------------|------------|----------|------------|--------|------------|------------|------------|------------|------------|------------|------------|------------|------------|--------|------------|--------|------------|--------|------------|
| Transcript                                          | Lyciumin chemotype | Flower 1 | Flower 2   | Flower 3 | Leaf 1     | Leaf 2     | Leaf 3     | Seed 1   | Seed 2     | Seed 3 | Stem 1     | Stem 2     | Stem 3     | Seedling 1 | Seedling 2 | Seedling 3 |            |            |            |        |            |        |            |        |            |
| AUR62017095                                         | Lyciumin F & G     | 1227.05  | 1334.44    | 1095.61  | 270.1      | 355.2      | 207.5      | 77.2     | 58.82      | 71.32  | 1196.8     | 2195.5     | 1938       | 154.87     | 183.16     | 122.36     |            |            |            |        |            |        |            |        |            |
|                                                     | Reference (SRA)    | Flower 1 | SRR5974430 | Seed 1   | SRR5974426 | Seedling 1 | SRR5974428 | Flower 2 | SRR5974427 | Seed 2 | SRR5974424 | Seedling 2 | SRR5974429 | Flower 3   | SRR5974436 | Seed 3     | SRR5974431 | Seedling 3 | SRR5974434 |        |            |        |            |        |            |
|                                                     |                    | Flower 2 | SRR5974427 | Seed 2   | SRR5974424 | Seedling 2 | SRR5974429 | Flower 3 | SRR5974436 | Seed 3 | SRR5974431 | Seedling 3 | SRR5974434 | Leaf 1     | SRR5974438 | Stem 1     | SRR5974432 | Leaf 2     | SRR5974437 | Stem 2 | SRR5974433 | Leaf 3 | SRR5974435 | Stem 3 | SRR5974425 |

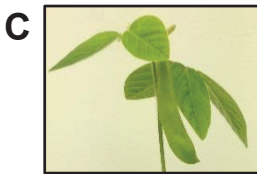

*Glycine max*

| Gene expression (bar.utoronto.ca, [RPKM]) in tissues/conditions |                    |                                                                                                                                                              |            |            |                       |                       |          |                 |                 |                 |                 |                  |                  |                  |                  |                  |     |
|-----------------------------------------------------------------|--------------------|--------------------------------------------------------------------------------------------------------------------------------------------------------------|------------|------------|-----------------------|-----------------------|----------|-----------------|-----------------|-----------------|-----------------|------------------|------------------|------------------|------------------|------------------|-----|
| Transcript                                                      | Lyciumin chemotype | Flower                                                                                                                                                       | Leaves     | Green Pods | Nodule                | Root                  | Root tip | Root Hair 12HAI | Root Hair 24HAI | Root Hair 48HAI | Root Hair 84HAI | Root Hair 108HAI | Root Hair 144HAI | Root Hair 180HAI | Root Hair 216HAI | Root Hair 252HAI | SAM |
| Glyma.12G217300                                                 | Lyciumin H         | 247.58                                                                                                                                                       | 33.73      | 3505.92    | 1959.25               | 2072.86               | 6.48     | 508.24          | 709.11          | 720.55          | 999.91          | 782.47           | 931.26           | 6611.09          | 259.63           |                  |     |
| Glyma.12G217400 (Sal3-2)                                        | Lyciumin I         | 330.31                                                                                                                                                       | 154.83     | 681.91     | 3770.9                | 4154.42               | 1.54     | 399.73          | 513.62          | 688.9           | 1066.59         | 760.96           | 1386.26          | 1757             | 648.96           |                  |     |
|                                                                 | Reference          | Libault, M., Farmer, A., Brechenmacher, L., et al. <i>Plant Physiol.</i> 2010, 152, 541-555.<br>Libault, M. et al. <i>The Plant Journal</i> 2010, 63, 85-99. |            |            |                       |                       |          |                 |                 |                 |                 |                  |                  |                  |                  |                  |     |
| Transcript                                                      | Lyciumin chemotype | Flower                                                                                                                                                       | Young Leaf | One CM Pod | Pod Shell (10-13 DAF) | Pod Shell (14-17 DAF) | Nodule   | Root            | Seed 10-13 DAF  | Seed 14-17 DAF  | Seed 21 DAF     | Seed 25 DAF      | Seed 28 DAF      | Seed 35 DAF      | Seed 42 DAF      |                  |     |
| Glyma.12G217300                                                 | Lyciumin H         | 317                                                                                                                                                          | 10         | 458        | 379                   | 877                   | 231      | 489             | 12              | 24              | 40              | 24               | 17               | 19               | 15               |                  |     |
| Glyma.12G217400 (Sal3-2)                                        | Lyciumin I         | 104                                                                                                                                                          | 23         | 141        | 120                   | 95                    | 220      | 790             | 4               | 3               | 4               | 36               | 68               | 332              | 399              |                  |     |
|                                                                 | Reference          | Severin, et al. <i>BMC Plant Biology</i> 2010, 10, 160.                                                                                                      |            |            |                       |                       |          |                 |                 |                 |                 |                  |                  |                  |                  |                  |     |

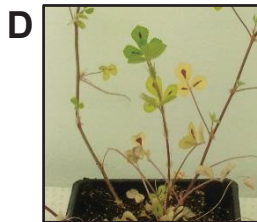

*Medicago truncatula*

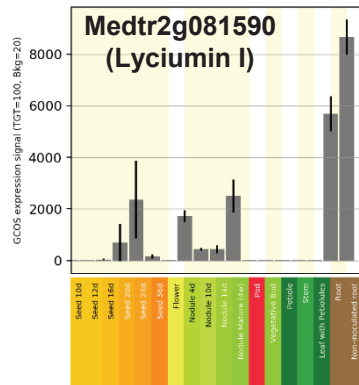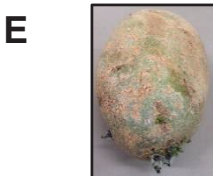

*Solanum tuberosum*

| Gene expression (RSEM, [TPM]) in tissues/conditions |                           |           |           |           |           |           |             |            |           |           |           |           |           |              |            |            |              |
|-----------------------------------------------------|---------------------------|-----------|-----------|-----------|-----------|-----------|-------------|------------|-----------|-----------|-----------|-----------|-----------|--------------|------------|------------|--------------|
| Transcript                                          | Lyciumin chemotype        | Flower    | Leaf      | Leaf 2    | Petiole   | Root      | Whole plant | Shoot apex | Stamen    | Stem      | Stolon    | Tuber     | Tuber 2   | Tuber cortex | Tuber peel | Tuber pith | Tuber sprout |
| PGSC0003DMG400047074                                | Lyciumin B, K, L, M, N, O | 4.56      | 17.03     | 2.86      | 10.71     | 1190.71   | 324.87      | 474.98     | 2.26      | 118.65    | 491.75    | 718.27    | 411.05    | 91.6         | 606.46     | 38.04      | 3599.35      |
|                                                     | Reference                 | ERR029903 | ERR029910 | ERR029919 | ERR029911 | ERR029917 | ERR029922   | ERR029912  | ERR029918 | ERR029913 | ERR029914 | ERR029915 | ERR029916 | ERR029924    | ERR029921  | ERR029920  | ERR029923    |

Figure S24 | Lyciumin precursor gene expression in (A) *Amaranthus hypochondriacus*, (B) *Chenopodium quinoa*, (C) *Glycine max*, (D) *Medicago truncatula*<sup>15</sup> and (E) *Solanum tuberosum*.

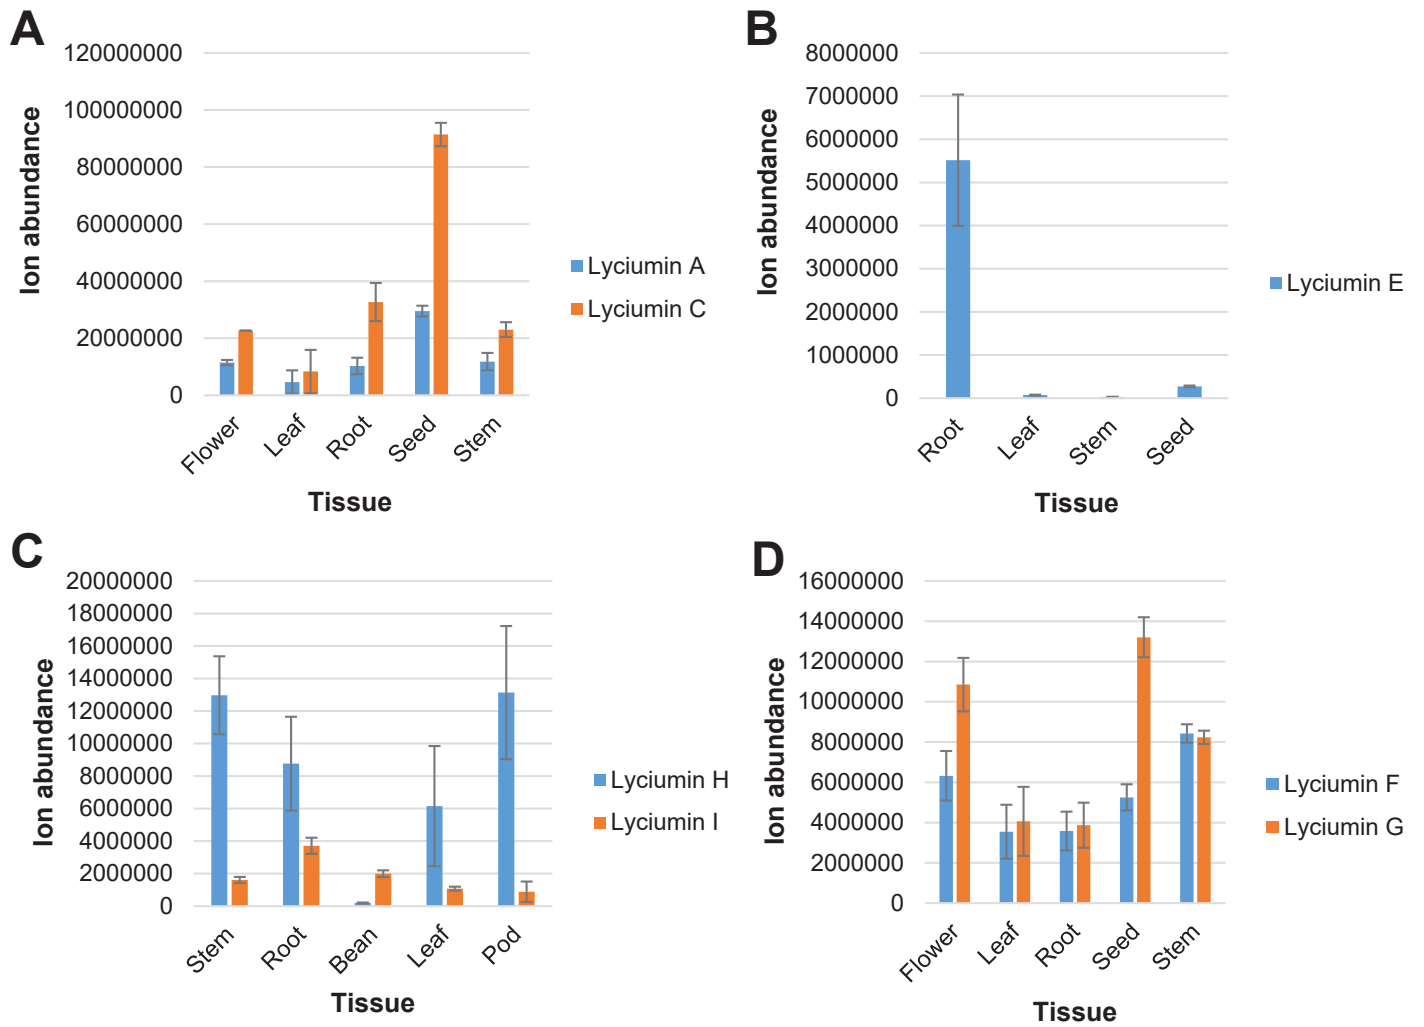

**Figure S25 | Lyciumin chemotyping in source plant tissues. (A) *Amaranthus hypochondriacus*. (B) *Beta vulgaris*. (C) *Glycine max*. (D) *Chenopodium quinoa*.**

**A** Predicted precursor peptide from *Solanum tuberosum* genome (JGI Phytozome, v4.03)

>PGSC0003DMG400047074 Org\_Stuberosum peptide: PGSC0003DMP400069178 BURP domain-containing protein (PAC:37467747)  
MELHHQYYFFTFVSVIFVVSAAANLSPEVYWRVKLPNTMPMTPPIKDALHISDGIPLRSTFTKYANHGGEVWDGIRLPFENELHKVR**QPWGVDSWYQAAPENELHKVRQPYGVGVWYN**  
**DAAKKDLNDNHVPVTPYFFETDLHOGKKMNLOS LKYNPAPILPRKVVDSTAFSSDKIEEILNHFSVDKDSERAKDIKKTIKTCEEPAGNGEVKHCATSLES MIDFTLSHLGTNNIIAM**  
**STEVEKETPEVQOAYTIEKVEEKANGKGVVCHKVAYPYAVHFCHDVGSTRTFMVSMVGADGTKVNAVSVCHEDTASMNPKALPFOLLNVKPGDKPICHFTLDDOIALFPSONAVLQVAE**  
**N**

**B** LbaLycA blastp hits of Trinity (v2.4) *de novo* transcriptome assembly:

>lcl|Potato\_tuber|TRINITY\_DN47721\_c0\_g1\_i1 (5' partial)  
VR**QPFVGRWYN**DAASENELHKVR**QPFVGVWYQAASENELHKVRQPYGVGVWYN**DAAKKDLNDNHVPVTPYFFETDLHOGKKMNLES LKYNPAPILPRKVVDSTAFSSDKIEEILNHFS  
**VDKDSERAKDIKKTIKMCEDPAGNGEVKHCATSLES MIDFTLSHLGTNNIIAMSTEVEKETPEVQTYTIEKVEEKANGKGVVCHKVAYPYAVHFCHDVGSTRTFMVSMVGADGTKVNAVSVCHEDTASMNPKALPFOLLNVKPGDKPICHFTLDDOIALFPSONALAE**N

>lcl|Potato\_tuber|TRINITY\_DN47721\_c1\_g2\_i3 (5' partial)  
APENELQKVR**QPFVGRWYN**DAAPENELQKVR**QPFVGRWYN**DAAPENELYKVR**QPFVGRWYN**DAAKKDLNDNHVPVTPYFFETDLHOGKQMNLOS LKYNPAPILPRKVVDSTAFSSDKIEEILNHFS  
**VKHCATSLES MIDFTLSHLGTNNIIAMSTEVEKETPEVQTYTIEKVEEKANGKGVVCHKVAYPYAVHFCHDVGSTRTFMVSMVGADGTKVNAVSVCHEDTASMNPKALPFOLLNVKPGDKPICHFTLDDOIALFPSONALAE**N

>lcl|Potato\_tuber|TRINITY\_DN47721\_c1\_g2\_i4 (5' partial)  
MGSWYQAAPENELHKVH**QPFVGVAVYN**DAAKKDLNDNHVPVTPYFFETDLHOGKKMNLOS LKYNPAPILPRKVVDSTAFSSDKIEEILNHFSVDKDSERAKDIKKTIKMCEDPAGNGE  
**VKHCATSLES MIDFTLSHLGTNNIIAMSTEVEKETPEVQTYTIEKVEEKANGKGVVCHKVAYPYAVHFCHDVGSTRTFMVSMVGADGTKVNAVSVCHEDTASMNPKALPFOLLNVKPGDKPICHFTLDDOIALFPSONALAE**N

>lcl|Potato\_tuber|TRINITY\_DN48305\_c1\_g2\_i2 (3' partial)  
MELHHQYYFFTFVSVIFVVSAAANLSPEVYWRVKLPNTMPMTPPIKDALHISEKTAYNGDGNTKIS**QPYGVFAWYKAATENELHKVRQPYGVFAWYKAASENVLHKVRQPYG**

**C** LbaLycA hits of rnaSPAdes (v1.0) *de novo* transcriptome assembly (kmer 25,75):

>lcl|Potato\_tuber|NODE\_10739\_length\_1460\_cov\_677.901\_ID\_21479  
MELHHQYYFFTLFVSVIFLVSAAANLSPEVYWRVKLPNTMPMTPPIKDALHISENELHKVR**QPYGVLAWYQAASENELHKVRQPYGVLAHQAAASENELHKVRQPYGVLAHQAAAPENEL**  
**HKVRQPYGVYRWYQAASENELHKVRQPYGVYRWYQAASENELHKVRQPYGVYRWYQAAPENELHKVRQPYGVSRWYNDAATKDLNDNHVPVTPYFFETDLHOGKKMNLOS LKYNPAPIL**  
**LPRKVVDSTAFSSDKIEEILNHFSVDKDSERAKDIKKTIKMCEDPAGNGEVKHCATSLES MIDFTLSHLGTNNIIAMSTEVEKETPEVQTYTIEKVEEKANGKGVVCHKVAYPYAVHF**  
**CHDVGSTRTFMVSMVGADGTKVNAVSVCHEDTASMNPKALPFOLLNVKPGDKPICHFTLDDOIALFPSONALAE**\*

>lcl|Potato\_tuber|NODE\_29201\_length\_620\_cov\_26.9761\_ID\_58407  
MELHHQYYFFTLFVSVIFVVSAAANLSPEVYWRVKLPNTMPMTPPIKDALHISEKTAYNGDGNTKIS**QPWGVGAWYQDAPENELHKVRQPWGVGSWYQASPENLHKVRQPWGVVAVYQA**  
**ASENKLHKVRQPWGVGSWYQAAPENELHKVRQPYGVFRWYQAASENELHKVRQPWGVGSWYQDASENELHKVRQPWG**

>lcl|Potato\_tuber|NODE\_26964\_length\_666\_cov\_44.9932\_ID\_53933  
MELHHQYYFFTFVSVIFVVSAAANLSPEVYWRVKLPNTMPMTPPIKDALHISEKTAYNGDGNTKIS**QPYGVFAWYQAASENELHKVRQPYGVGDWYQAASENELHKVRQPYGVFAWYKA**  
**ITENELHKVRQPYGVFAWYKAATENELHKVRQPYGVFAWYKAASENELHKVRQPYGVFAWYNDAAKKDLNDNHVPVTPYFFETDLHOGKKM**

>lcl|Potato\_tuber|NODE\_40653\_length\_459\_cov\_9.7474\_ID\_81309  
IKDALHISEKTAYNGDGNTKIS**QPWGVGAWYQDAPENELHKVRQPWGVGSWYQASPENLHKVRQPWGVGAWYQAAPENELHKVRQPWGVGSWYQAAPENELHKVRQPYGVFRWYQA**  
**ASENELHKVRQPWGVGSWYQDASENELHKVRQPWG**

**D** Core peptides from BURP domain precursor peptide genes:  
Genome sequence (v4.03): QPWGVDSW, QPYGVGVW  
Trinity transcriptome assembly: QPFVGRW, QPFVGVW, QPYGVGVW, QPWGVGRW, QPFVGVAV, **QPYGVFAW**  
rnaSPAdes assembly: **QPYGVLAW, QPYGVYRW, QPYGVSRW, QPWGVGAW, QPWGVVAV, QPWGVGSW, QPYGVFRW, QPYGVFAW, QPYGVGDW**

**Figure S26 | Genome and transcriptome mining of lyciumins from *Solanum tuberosum*.** (A) Lyciumin precursor peptide derived from *Solanum tuberosum* genome (BURP domain underlined, core peptides highlighted in red). (B) Lyciumin precursor peptide transcripts derived from *Solanum tuberosum* tuber transcriptome (SRR5970148) *de novo* assembled with Trinity (v2.4, BURP domain underlined, core peptides highlighted in red). (C) Lyciumin precursor peptide transcripts derived from *Solanum tuberosum* tuber transcriptome (SRR5970148) *de novo* assembled with rnaSPAdes (v1.0, BURP domain underlined, core peptides highlighted in red). (D) Predicted lyciumin core peptides derived from genome mining and transcriptome mining of *Solanum tuberosum*. Bold core peptides indicate detected lyciumin chemotypes.

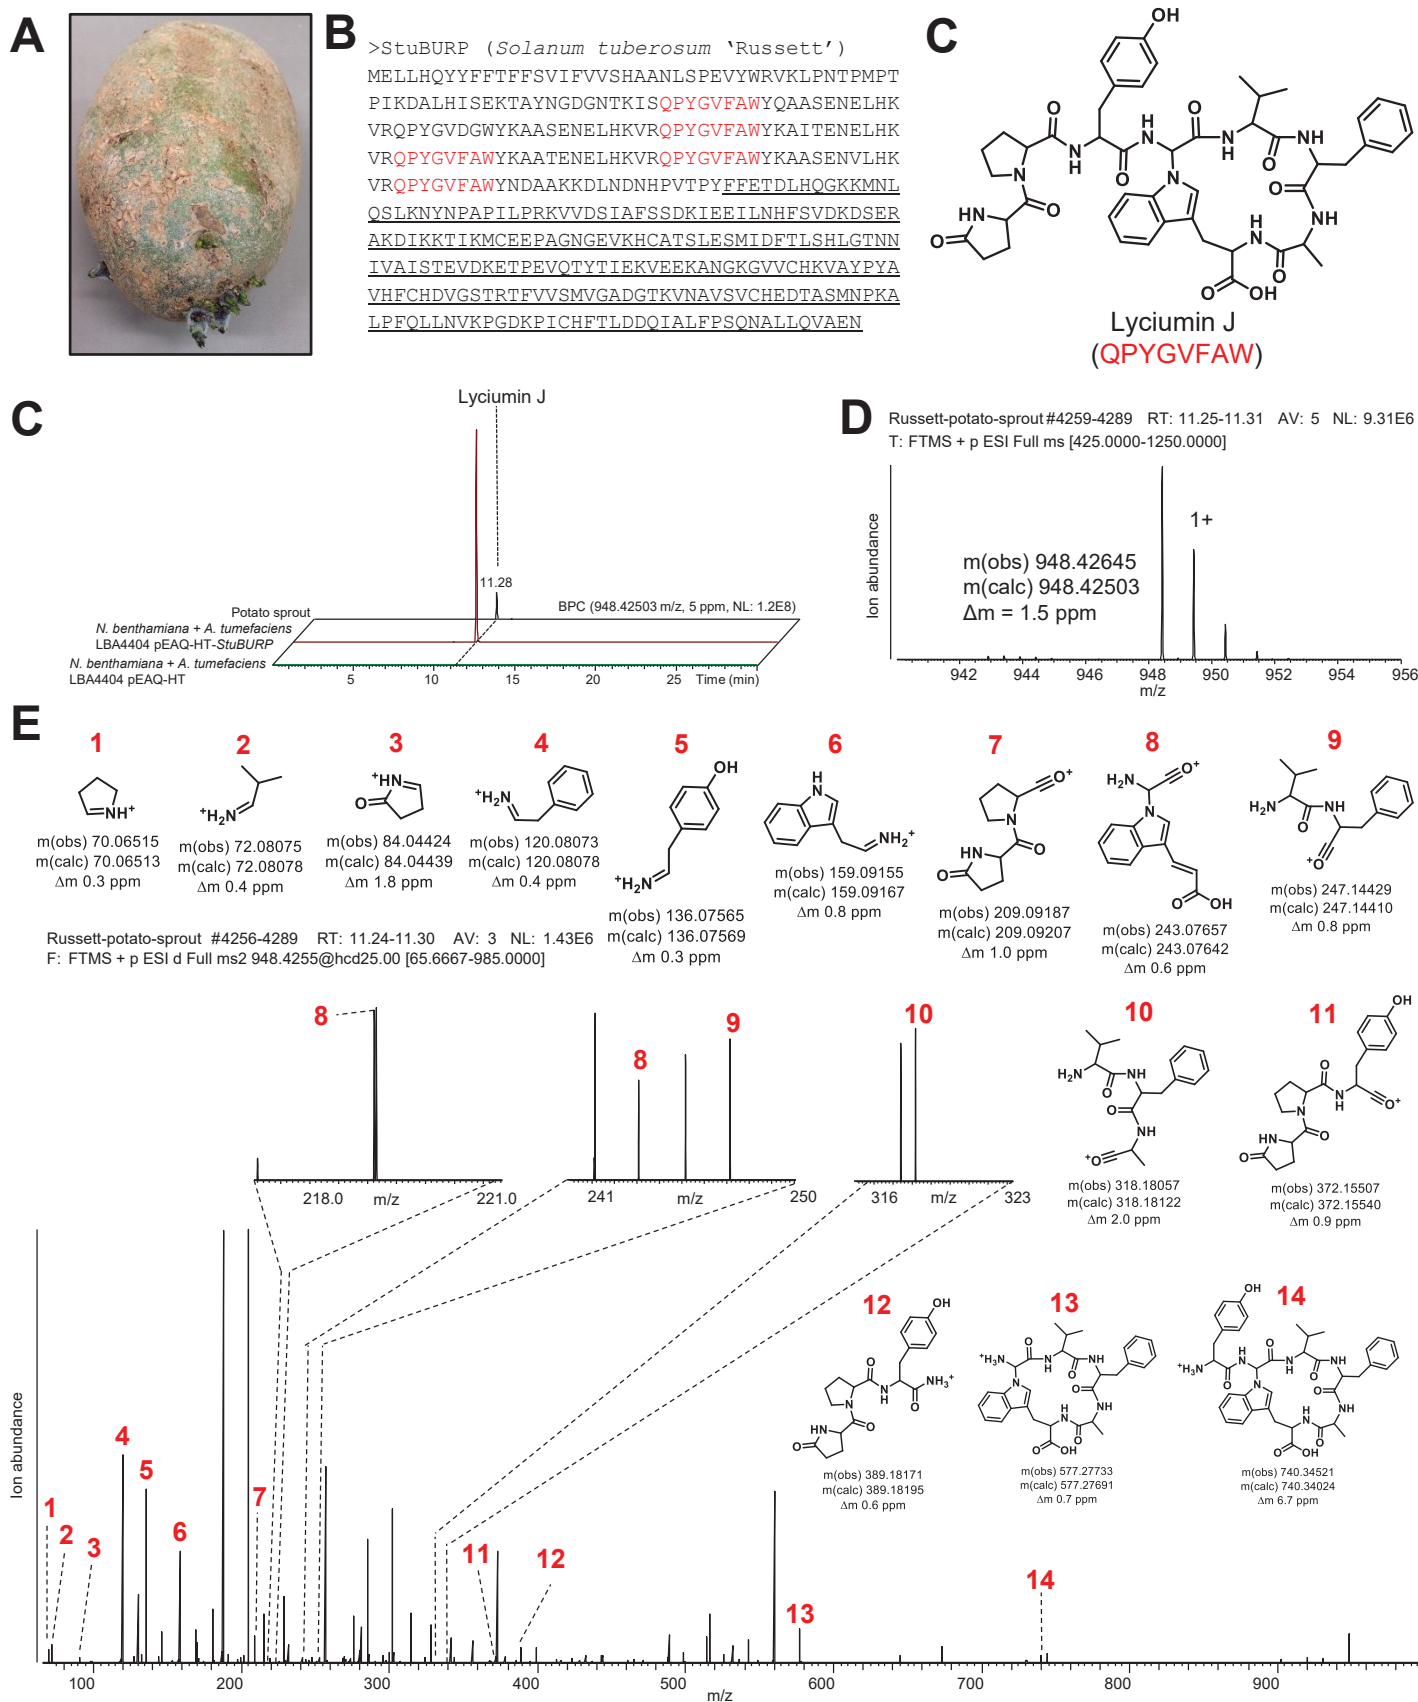

**Figure S26 | Genome and transcriptome mining of lyciumins from *Solanum tuberosum*.** (A) *Solanum tuberosum* 'Russett' – sprouting tuber. (B) *Solanum tuberosum* lyciumin J precursor peptide (BURP domain underlined, core peptide highlighted in red). (C) Predicted lyciumin J chemotype. (D) LC-MS chemotyping of predicted lyciumin J chemotype in peptide extract of *Solanum tuberosum* sprout and of *N. benthamiana* six days after infiltration with *A. tumefaciens* LBA4404 pEAQ-HT-*StuBURP*. (E) MS analysis of predicted lyciumin J chemotype of *Solanum tuberosum* sprout. (F) MS/MS analysis of predicted lyciumin J chemotype of *Solanum tuberosum* sprout.



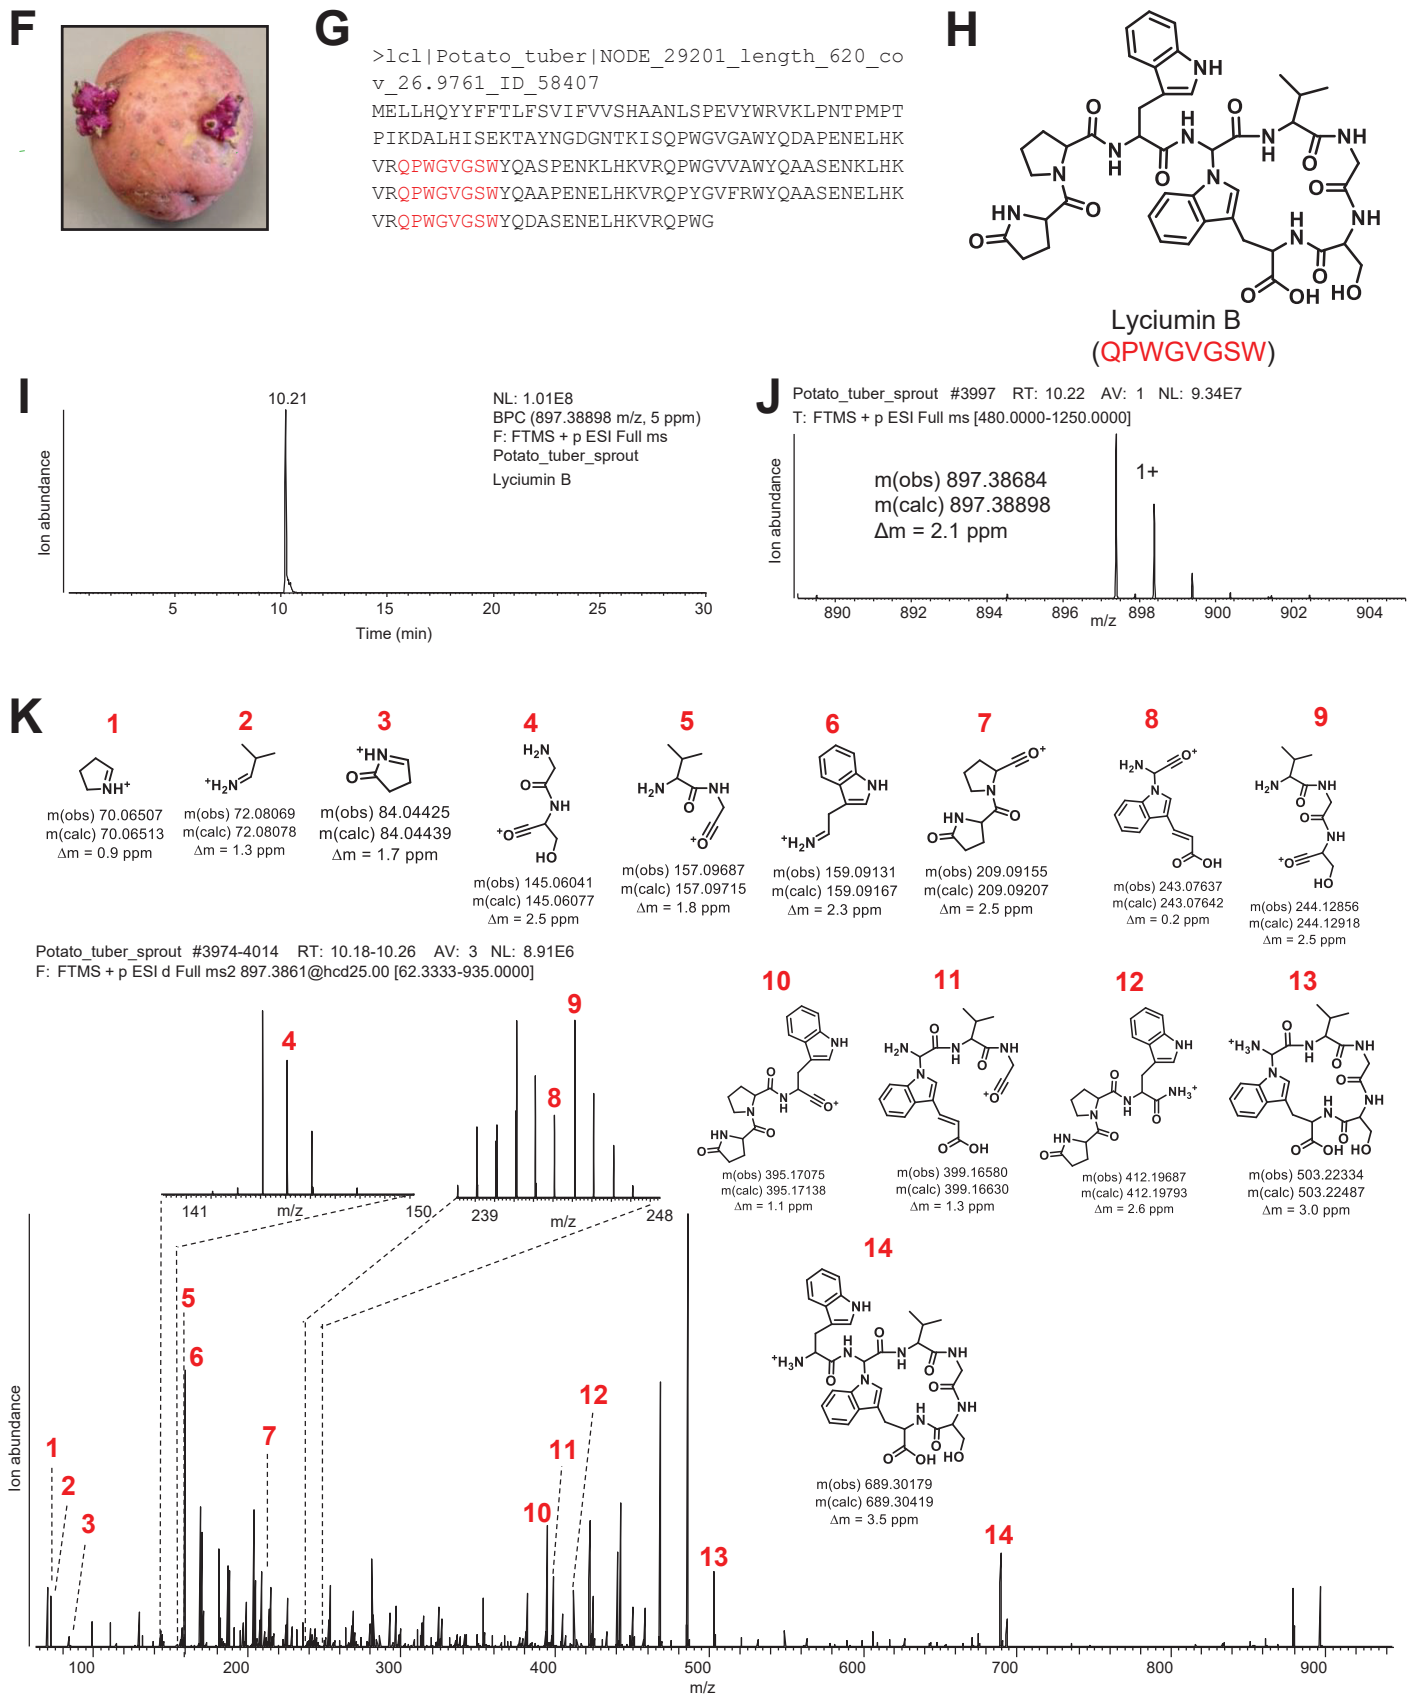

**Figure S26 | Genome and transcriptome mining of lyciumins from *Solanum tuberosum*.** (F) *Solanum tuberosum* 'Red potato' - sprouting tuber. (G) *Solanum tuberosum* lyciumin B precursor peptide transcript (BURP domain underlined, core peptides highlighted in red). (H) Predicted lyciumin B chemotype. (I) LC-MS chemotyping of predicted lyciumin B chemotype in peptide extract of *Solanum tuberosum* sprout. (J) MS analysis of predicted lyciumin B chemotype of *Solanum tuberosum* sprout. (K) MS/MS analysis of predicted lyciumin B chemotype of *Solanum tuberosum* sprout.

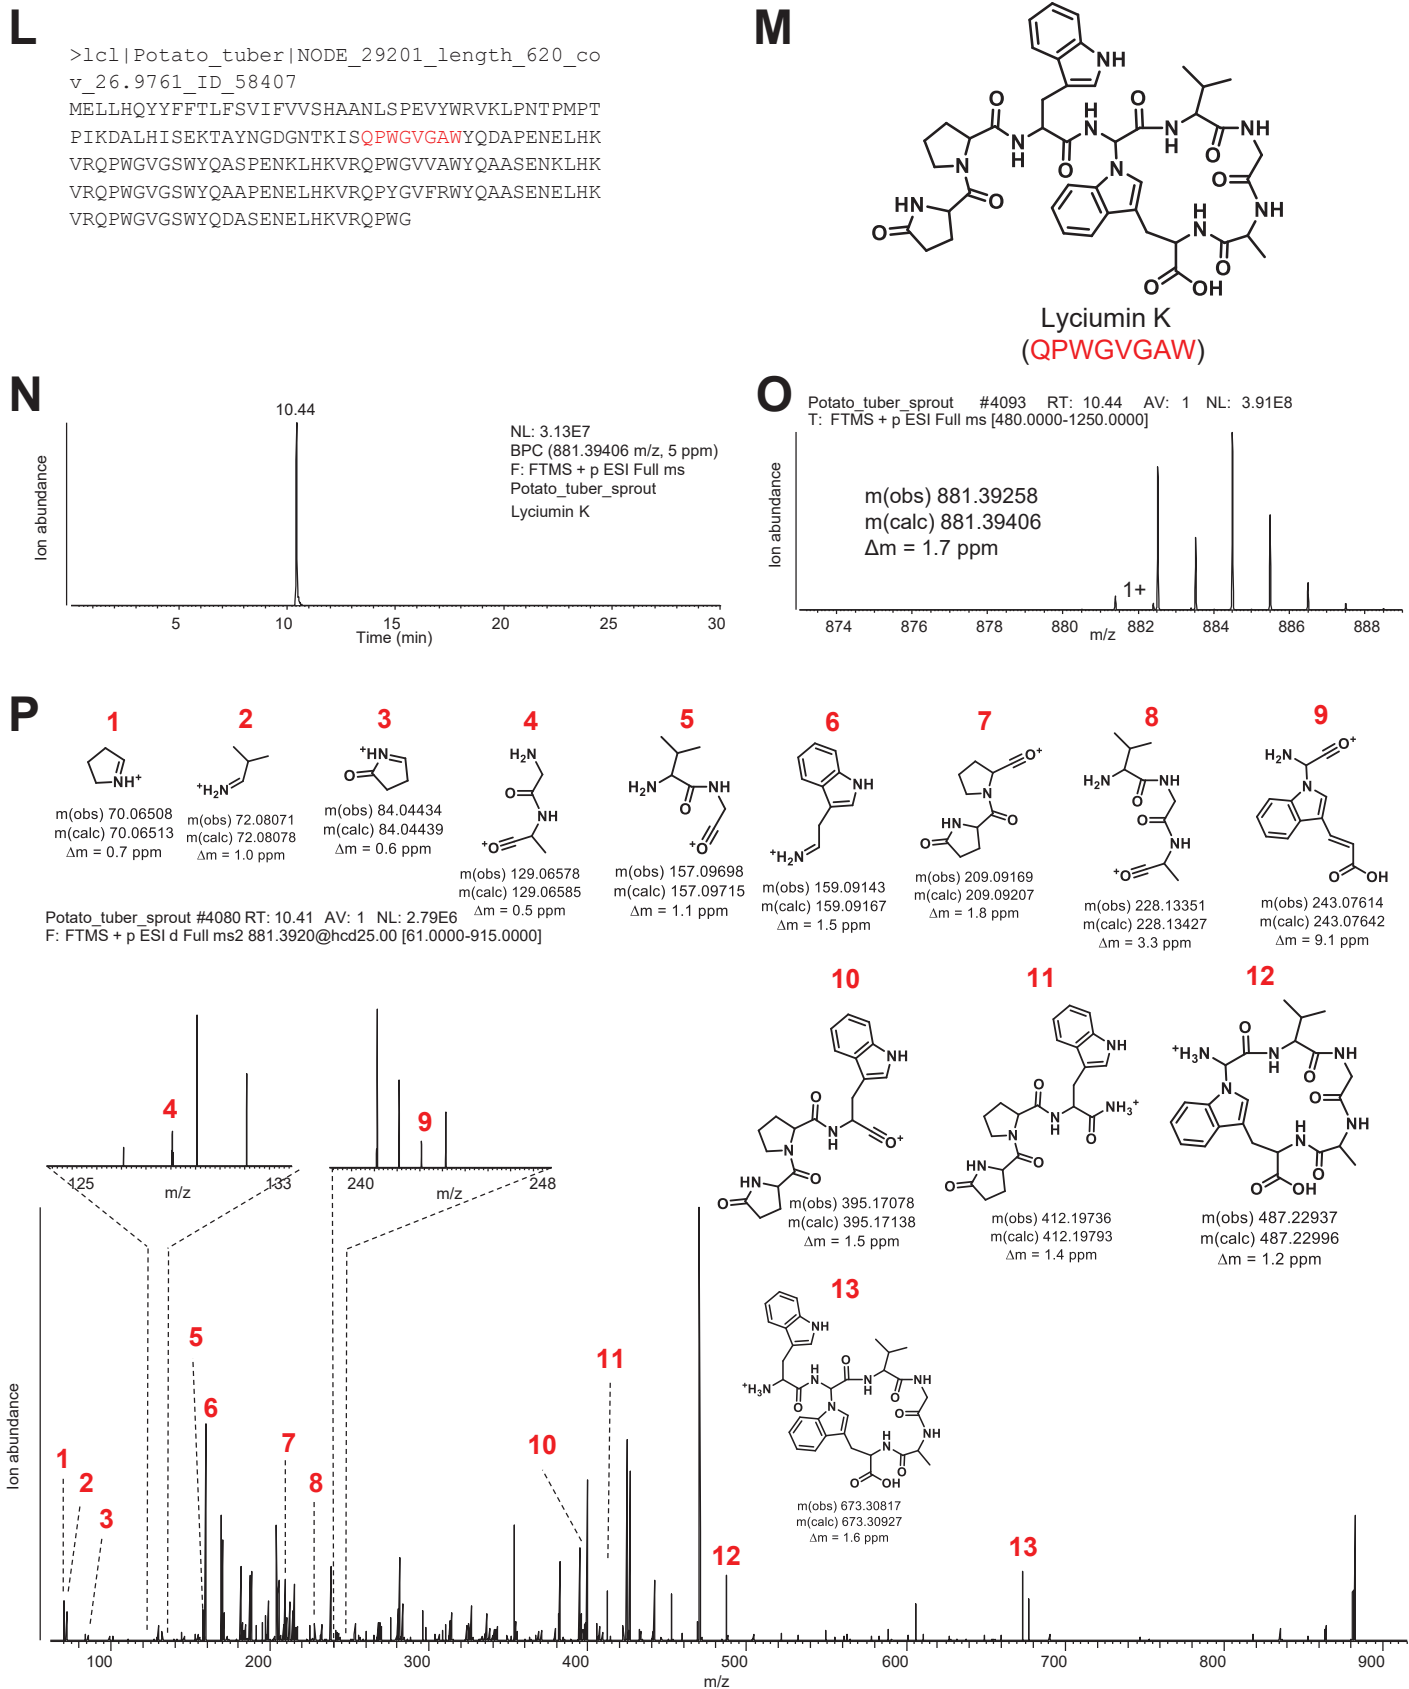

**Figure S26 | Genome and transcriptome mining of lyciumins from *Solanum tuberosum*.** (L) *Solanum tuberosum* lyciumin K precursor peptide transcript (BURP domain underlined, core peptides highlighted in red). (M) Predicted lyciumin K chemotype. (N) LC-MS chemotyping of predicted lyciumin K chemotype in peptide extract of *Solanum tuberosum* sprout. (O) MS analysis of predicted lyciumin K chemotype of *Solanum tuberosum* sprout. (P) MS/MS analysis of predicted lyciumin K chemotype of *Solanum tuberosum* sprout.

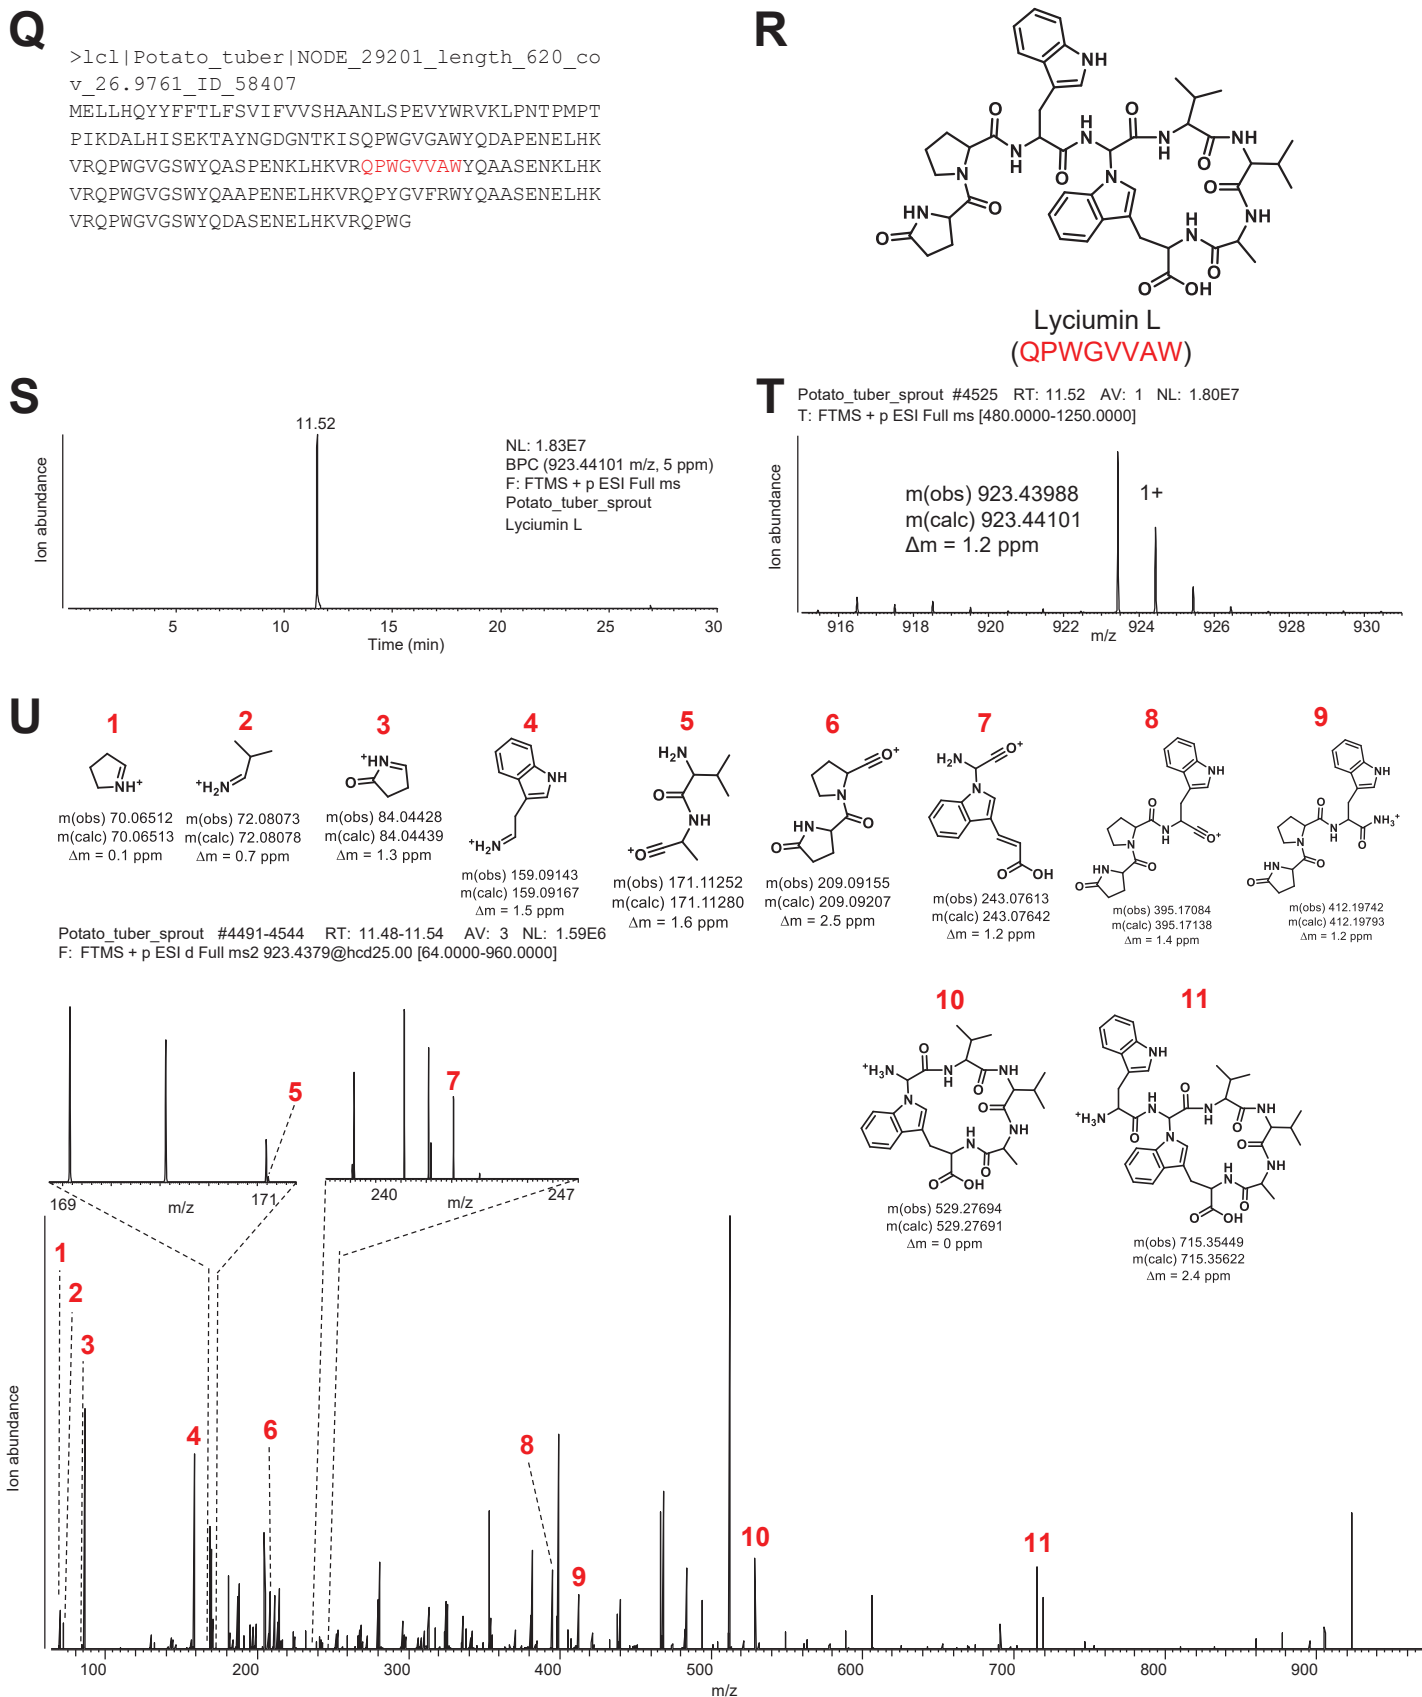

**Figure S26 | Genome and transcriptome mining of lyciumins from *Solanum tuberosum*.** (Q) *Solanum tuberosum* lyciumin L precursor peptide transcript (BURP domain underlined, core peptides highlighted in red). (R) Predicted lyciumin L chemotype. (S) LC-MS chemotyping of predicted lyciumin L chemotype in peptide extract of *Solanum tuberosum* sprout. (T) MS analysis of predicted lyciumin L chemotype of *Solanum tuberosum* sprout. (U) MS/MS analysis of predicted lyciumin L chemotype of *Solanum tuberosum* sprout.

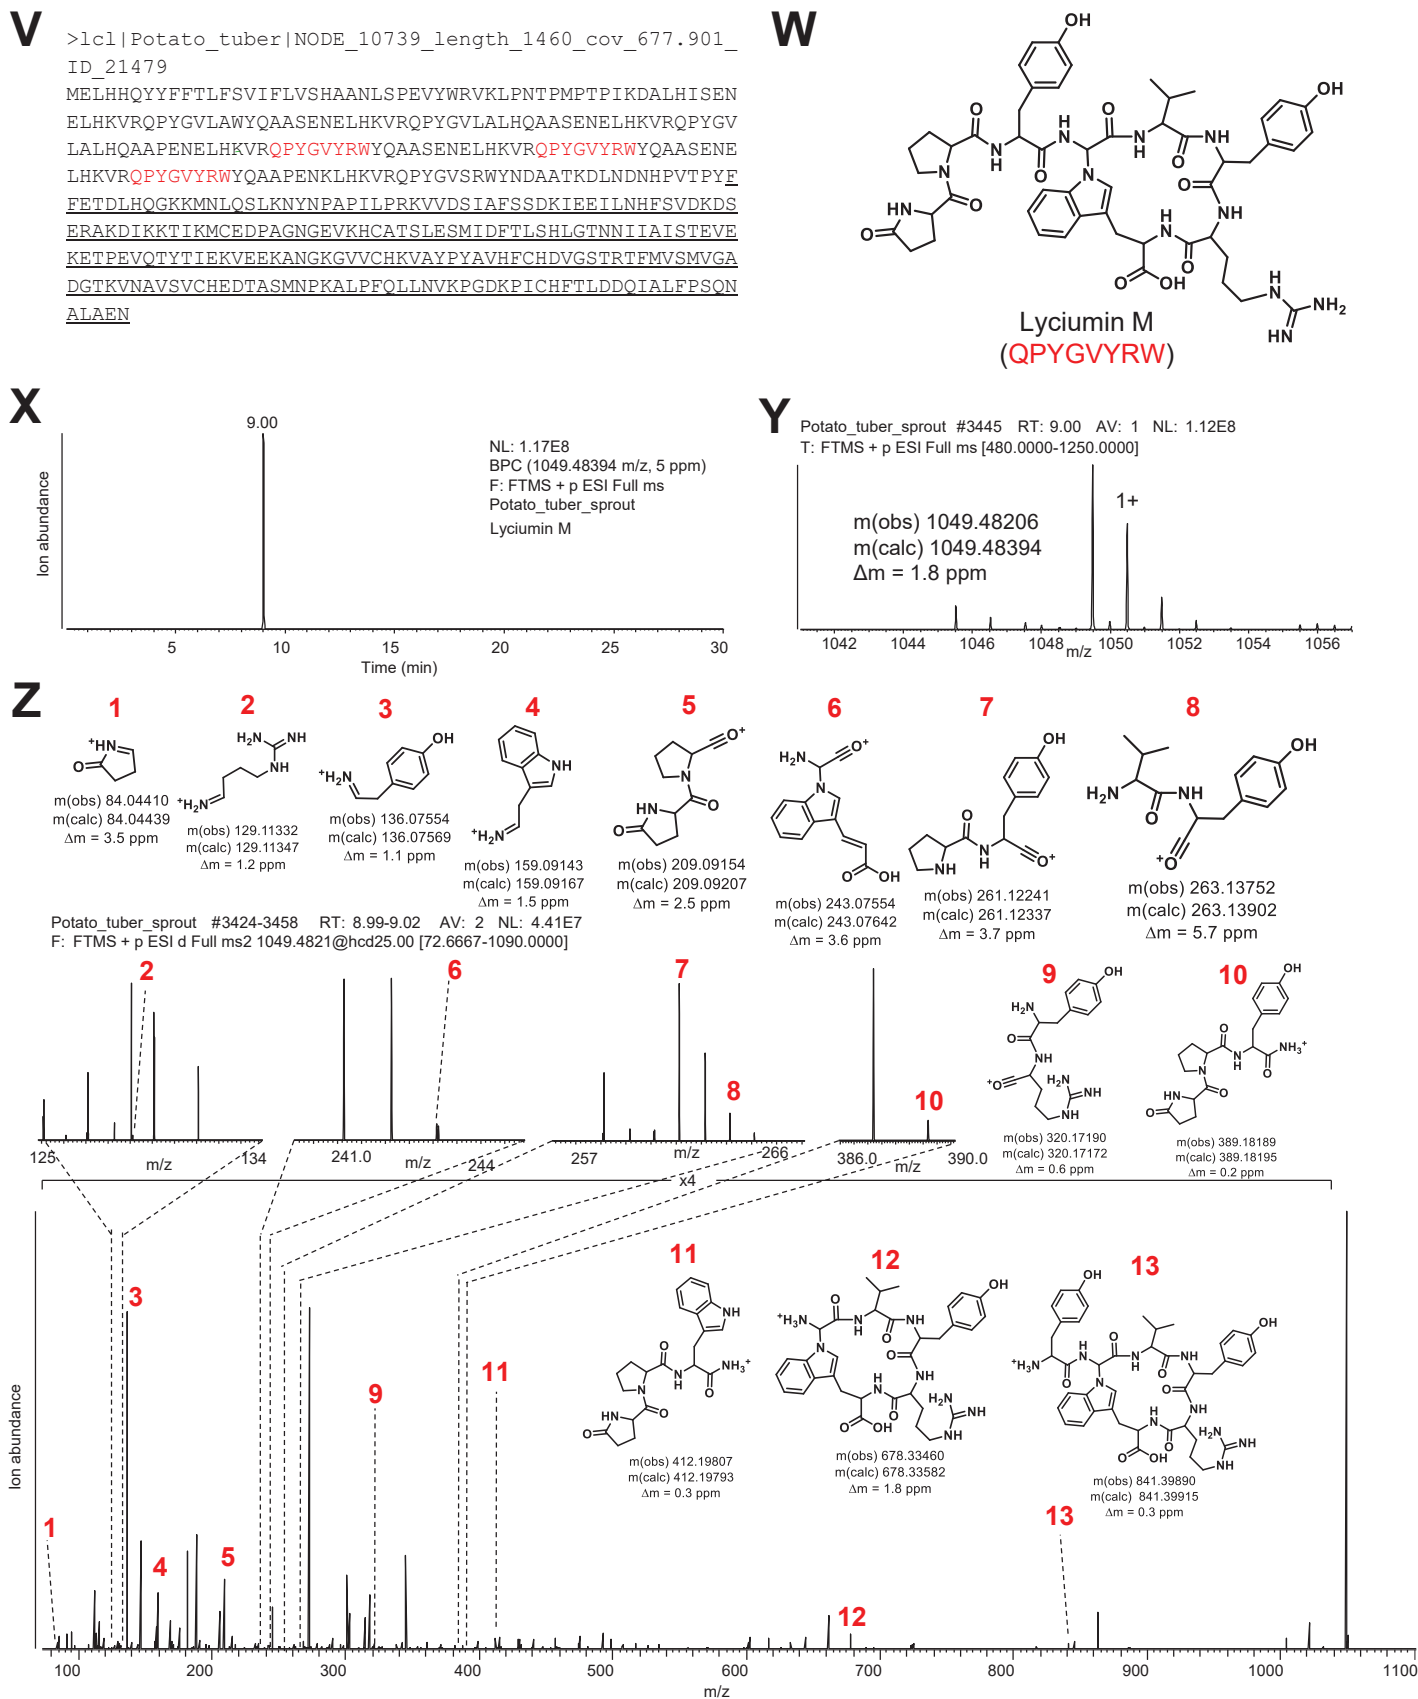

**Figure S26 | Genome and transcriptome mining of lyciumins from *Solanum tuberosum*.** (V) *Solanum tuberosum* lyciumin M precursor peptide transcript (BURP domain underlined, core peptides highlighted in red). (W) Predicted lyciumin M chemotype. (X) LC-MS chemotyping of predicted lyciumin M chemotype in peptide extract of *Solanum tuberosum* sprout. (Y) MS analysis of predicted lyciumin M chemotype of *Solanum tuberosum* sprout. (Z) MS/MS analysis of predicted lyciumin M chemotype of *Solanum tuberosum* sprout.

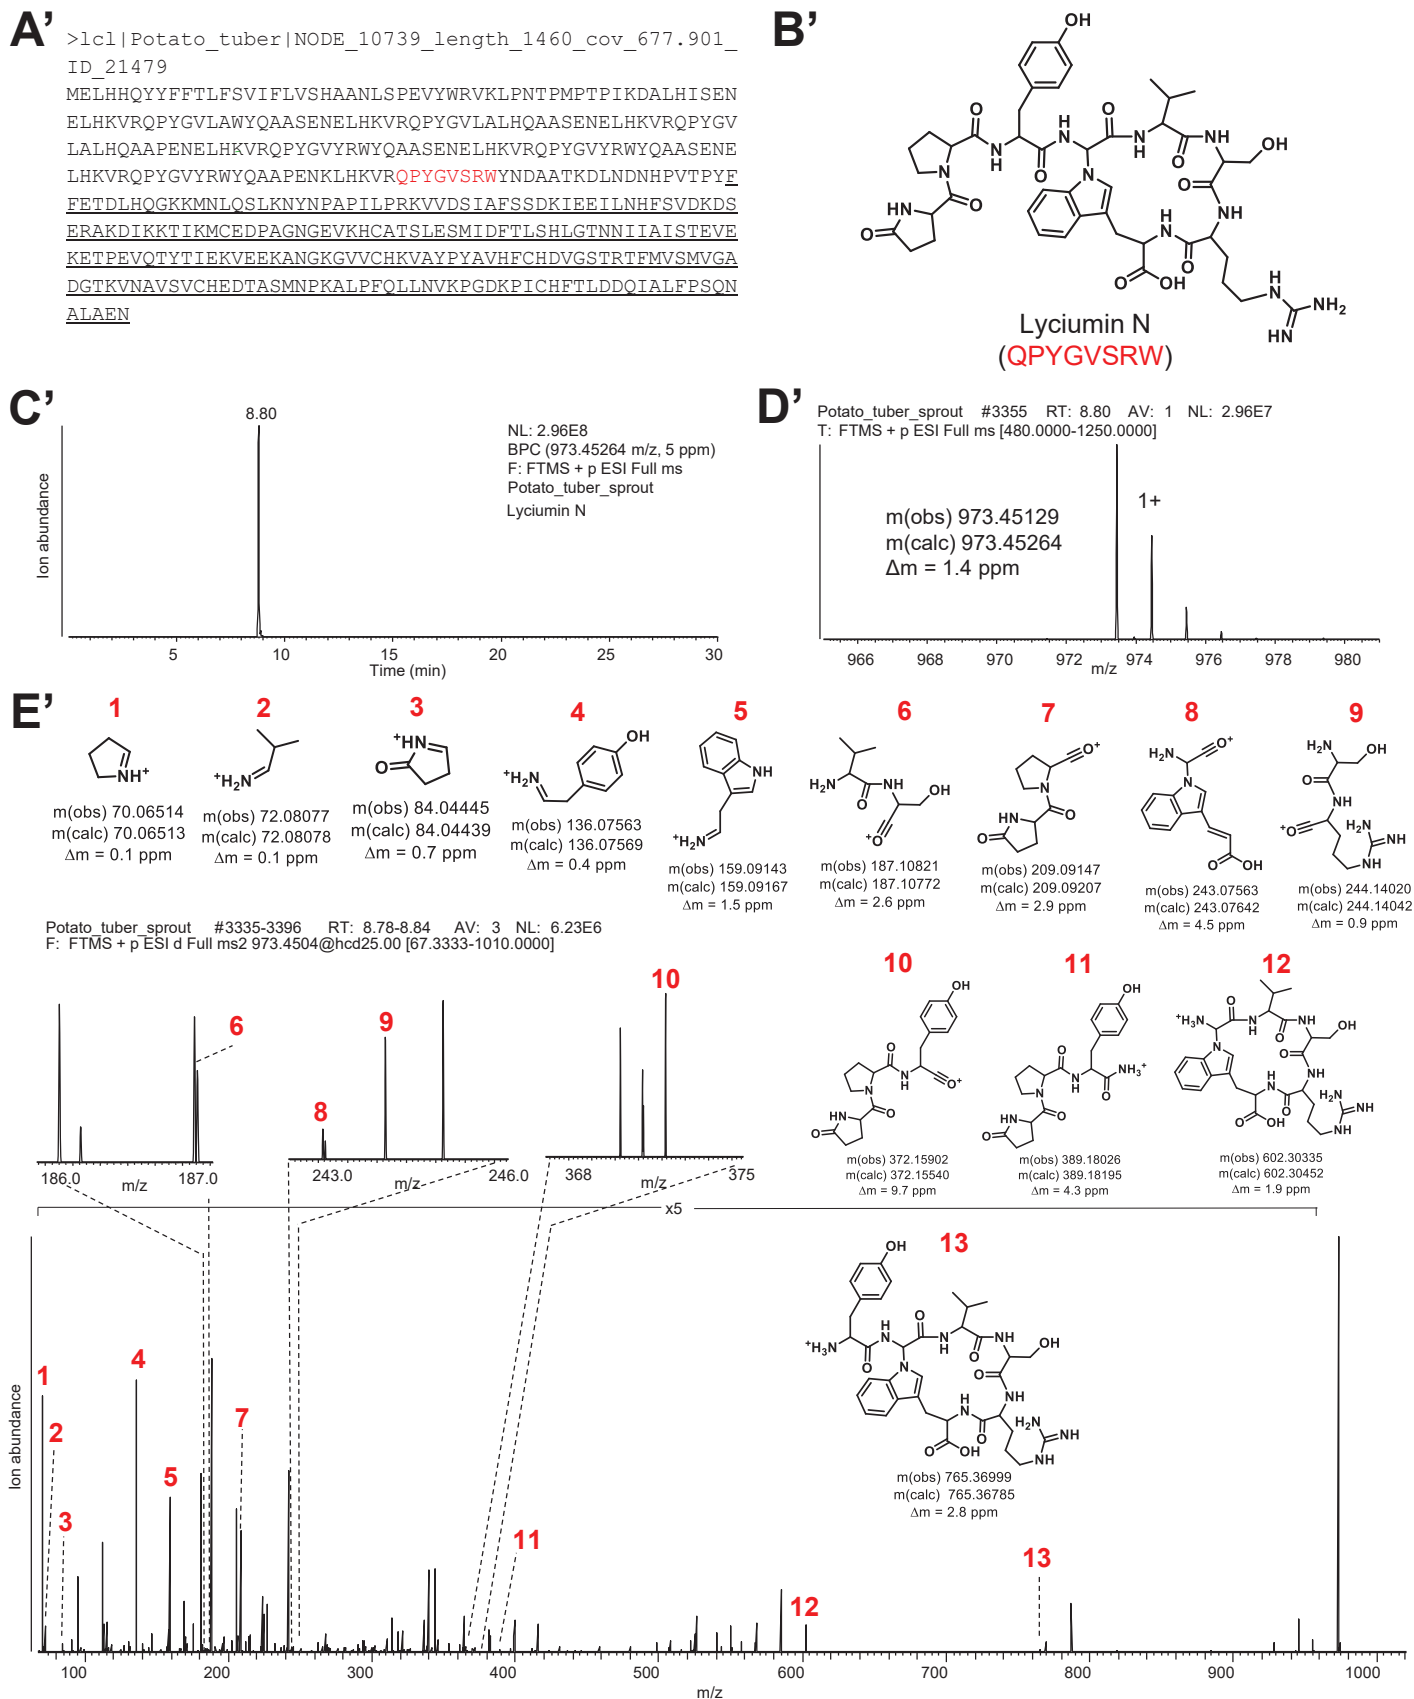

**Figure S26 | Genome and transcriptome mining of lyciumins from *Solanum tuberosum*.** (A') *Solanum tuberosum* lyciumin N precursor peptide transcript (BURP domain underlined, core peptides highlighted in red). (B') Predicted lyciumin N chemotype. (C') LC-MS chemotyping of predicted lyciumin N chemotype in peptide extract of *Solanum tuberosum* sprout. (D') MS analysis of predicted lyciumin N chemotype of *Solanum tuberosum* sprout. (E') MS/MS analysis of predicted lyciumin N chemotype of *Solanum tuberosum* sprout.

**F'**

```
>lcl|Potato_tuber|NODE_10739_length_1460_cov_677.901_
ID_21479
MELHHQYYFFTLFSVIFLVSHAANLSPEVYWRVKLPNTMPPTPIKDALHISEN
ELHKVRQPYGVLAWYQAASENELHKVRQPYGVLALHQAASENELHKVRQPYGV
LALHQAAPENELHKVRQPYGVRWYQAASENELHKVRQPYGVRWYQAASEN
LHKVRQPYGVRWYQAASENELHKVRQPYGVSRWYNDAATKDLNDNHPVTPYF
FETDLHQGKKMNLQSLKKNYPAPILPRKVVDSIAFSSDKIEILNHFSVDKDS
ERAKDIKKTIKMCEDPAGNGEVKHCATSLESMDIFTLSHLGTNNIIAISTEVE
KETPEVQTYTIEKVEEKANGKGVVCHKVAVPYAVHFCHDVGSTRTFMVSMVGA
DGTKVNAVSVCHEDTASMNPKALPFOLLNVKPGDKPICHFTLDDOIALFPSON
ALAEN
```

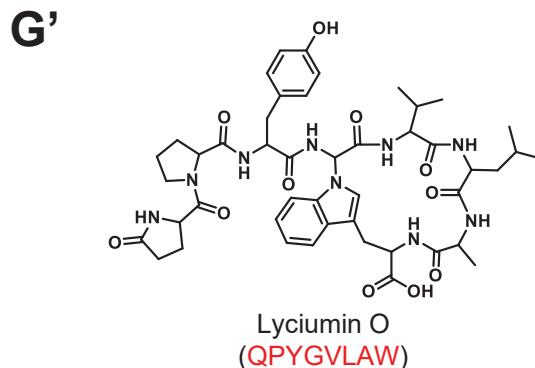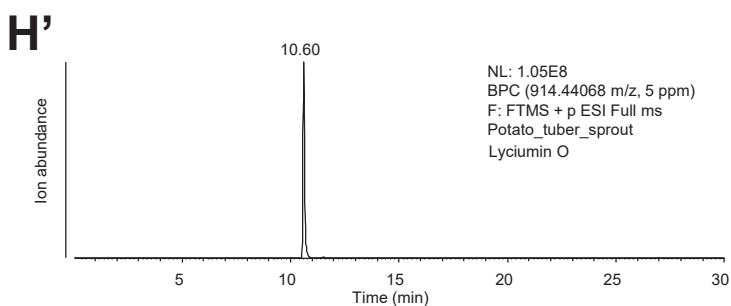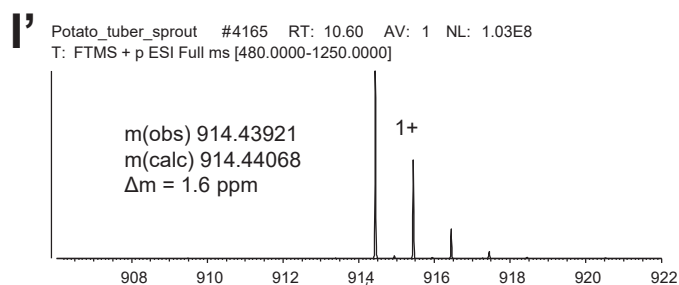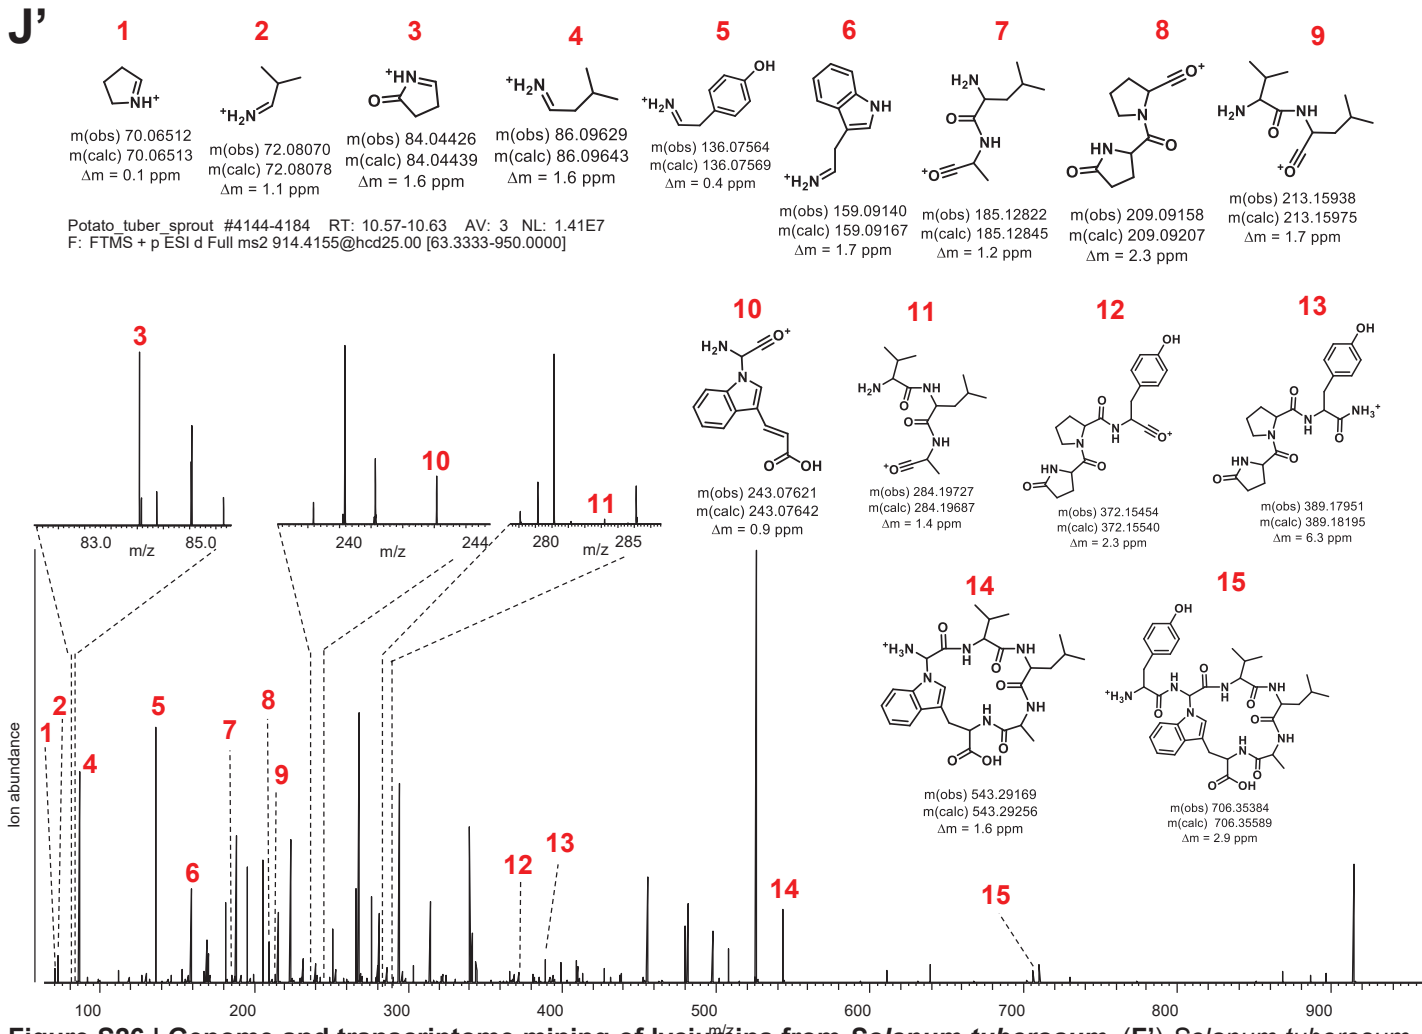

**Figure S26 | Genome and transcriptome mining of lyciumins from *Solanum tuberosum*.** (F') *Solanum tuberosum* lyciumin O precursor peptide transcript (BURP domain underlined, core peptides highlighted in red). (G') Predicted lyciumin O chemotype. (H') LC-MS chemotyping of predicted lyciumin O chemotype in peptide extract of *Solanum tuberosum* sprout. (I') MS analysis of predicted lyciumin O chemotype of *Solanum tuberosum* sprout. (J') MS/MS analysis of predicted lyciumin O chemotype of *Solanum tuberosum* sprout.

K'

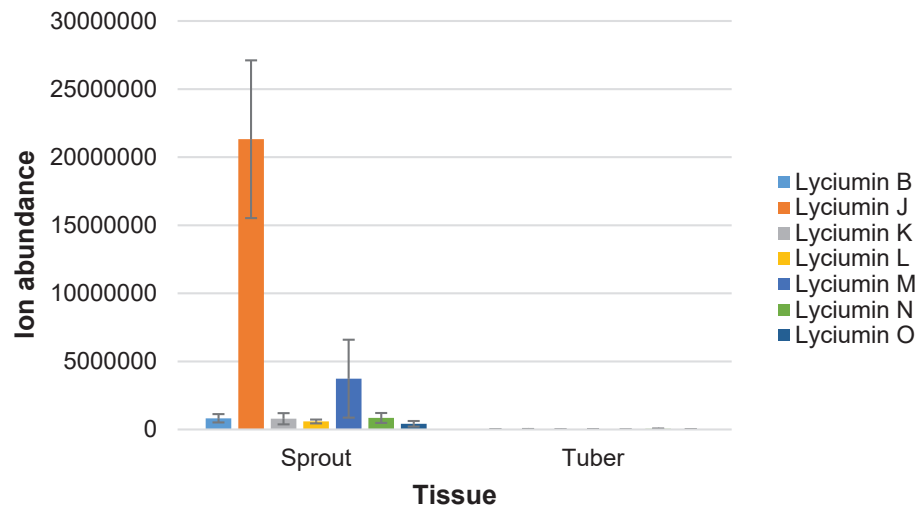

Figure S26 | Genome and transcriptome mining of lyciumins from *Solanum tuberosum*. (K') Chemotyping of lyciumins in sprout and tuber tissues of *Solanum tuberosum* ('red potato').

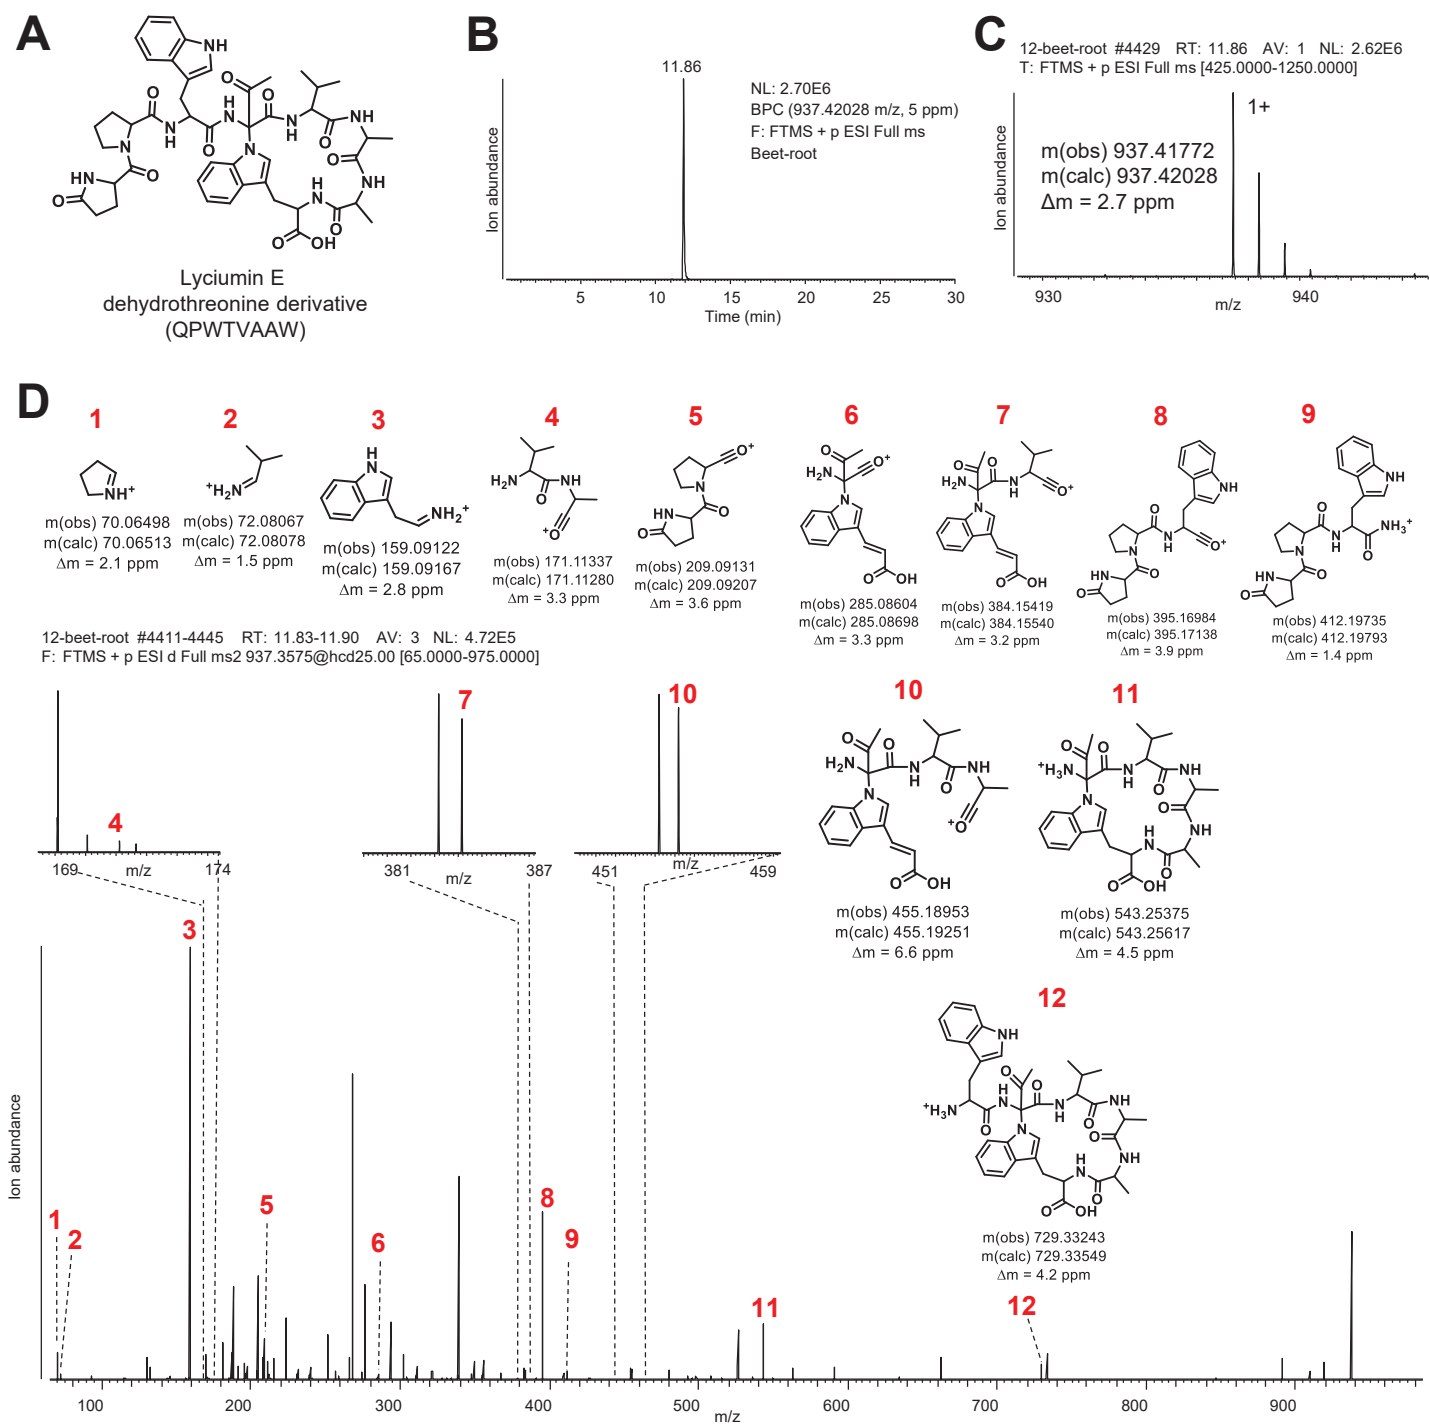

**Figure S27 | Detection of candidate dehydrothreonine-lyciumin derivatives in Amaranthaceae. (A)** Predicted *Beta vulgaris* lyciumin E dehydrothreonine derivative chemotype (core peptide). **(B)** LC-MS chemotyping of predicted lyciumin E dehydrothreonine derivative chemotype in peptide extract of *Beta vulgaris* root. **(C)** MS analysis of predicted lyciumin E dehydrothreonine derivative chemotype of *Beta vulgaris*. **(D)** MS/MS analysis of predicted lyciumin E dehydrothreonine derivative chemotype of *Beta vulgaris*.



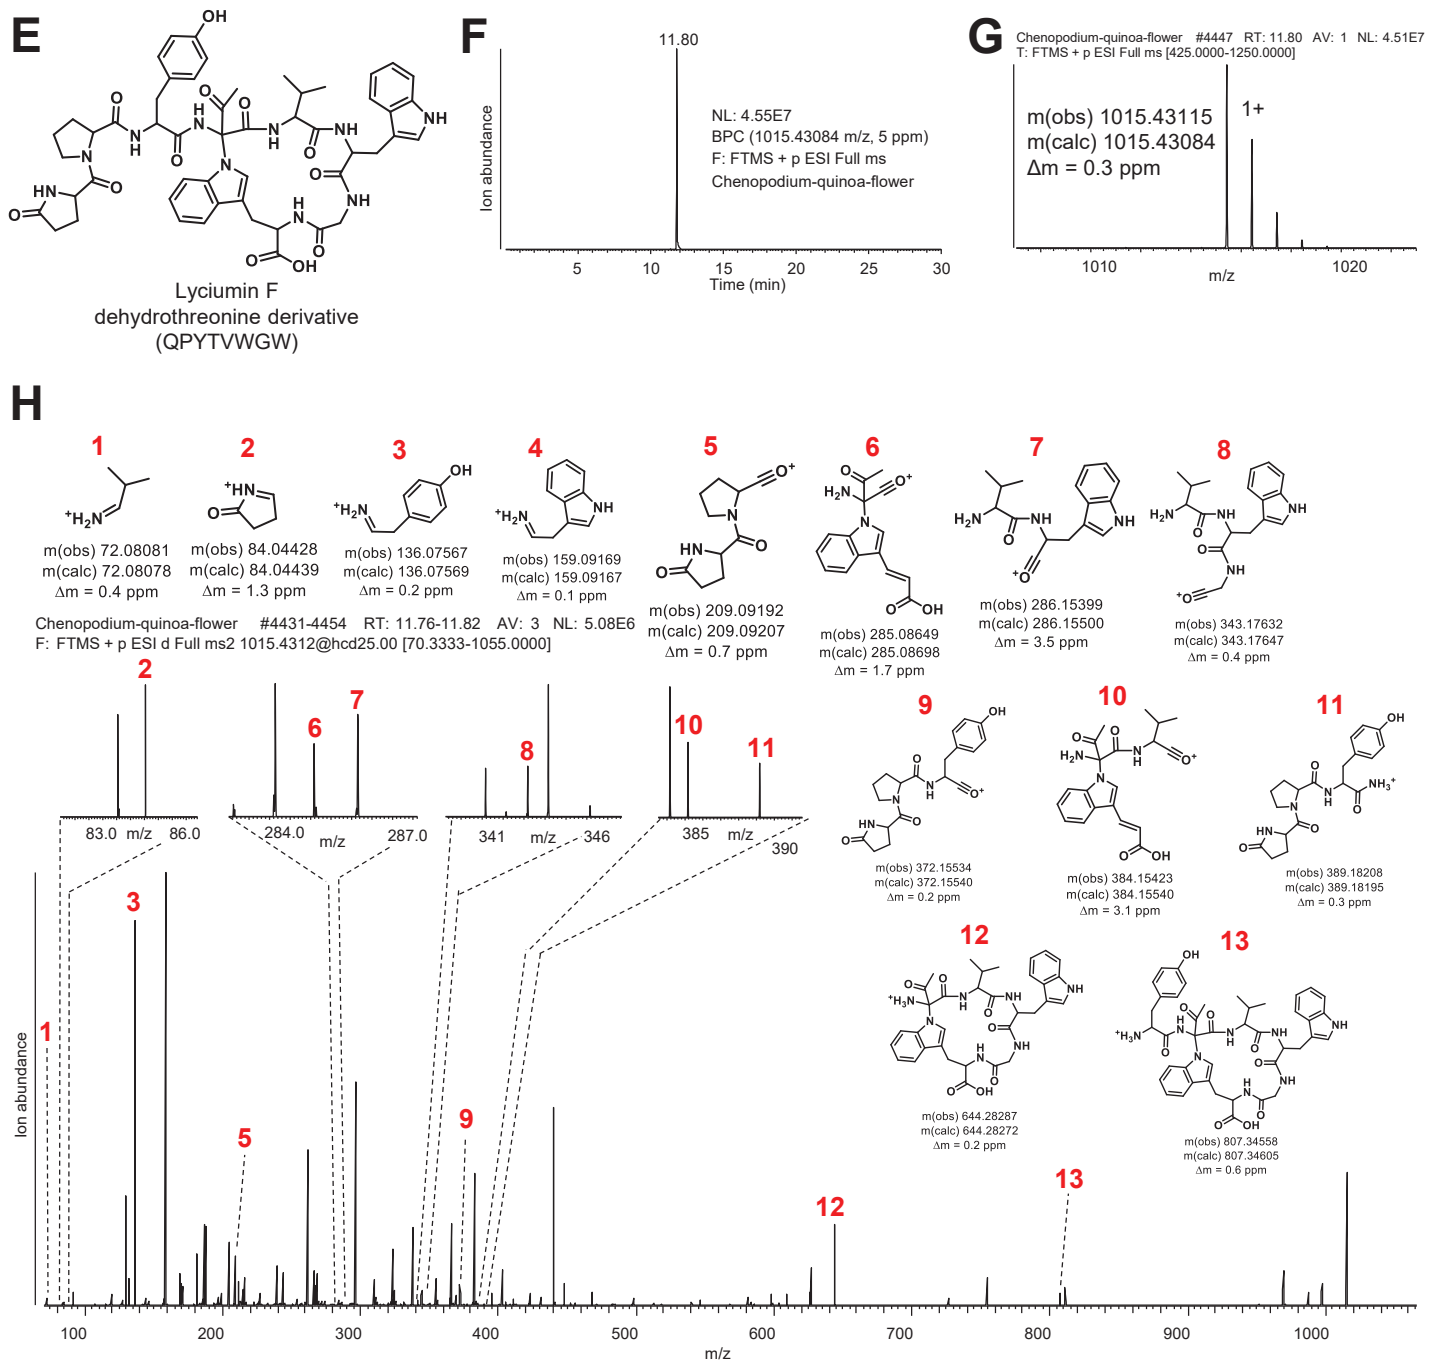

**Figure S27 | Detection of candidate dehydrothreonine-lyciumin derivatives in Amaranthaceae. (E)** Predicted *Chenopodium quinoa* lyciumin F dehydrothreonine derivative chemotype (core peptide). **(F)** LC-MS chemotyping of predicted lyciumin F dehydrothreonine derivative chemotype in peptide extract of *Chenopodium quinoa* flower. **(G)** MS analysis of predicted lyciumin F dehydrothreonine derivative chemotype of *Chenopodium quinoa*. **(H)** MS/MS analysis of predicted lyciumin F dehydrothreonine derivative chemotype of *Chenopodium quinoa*.

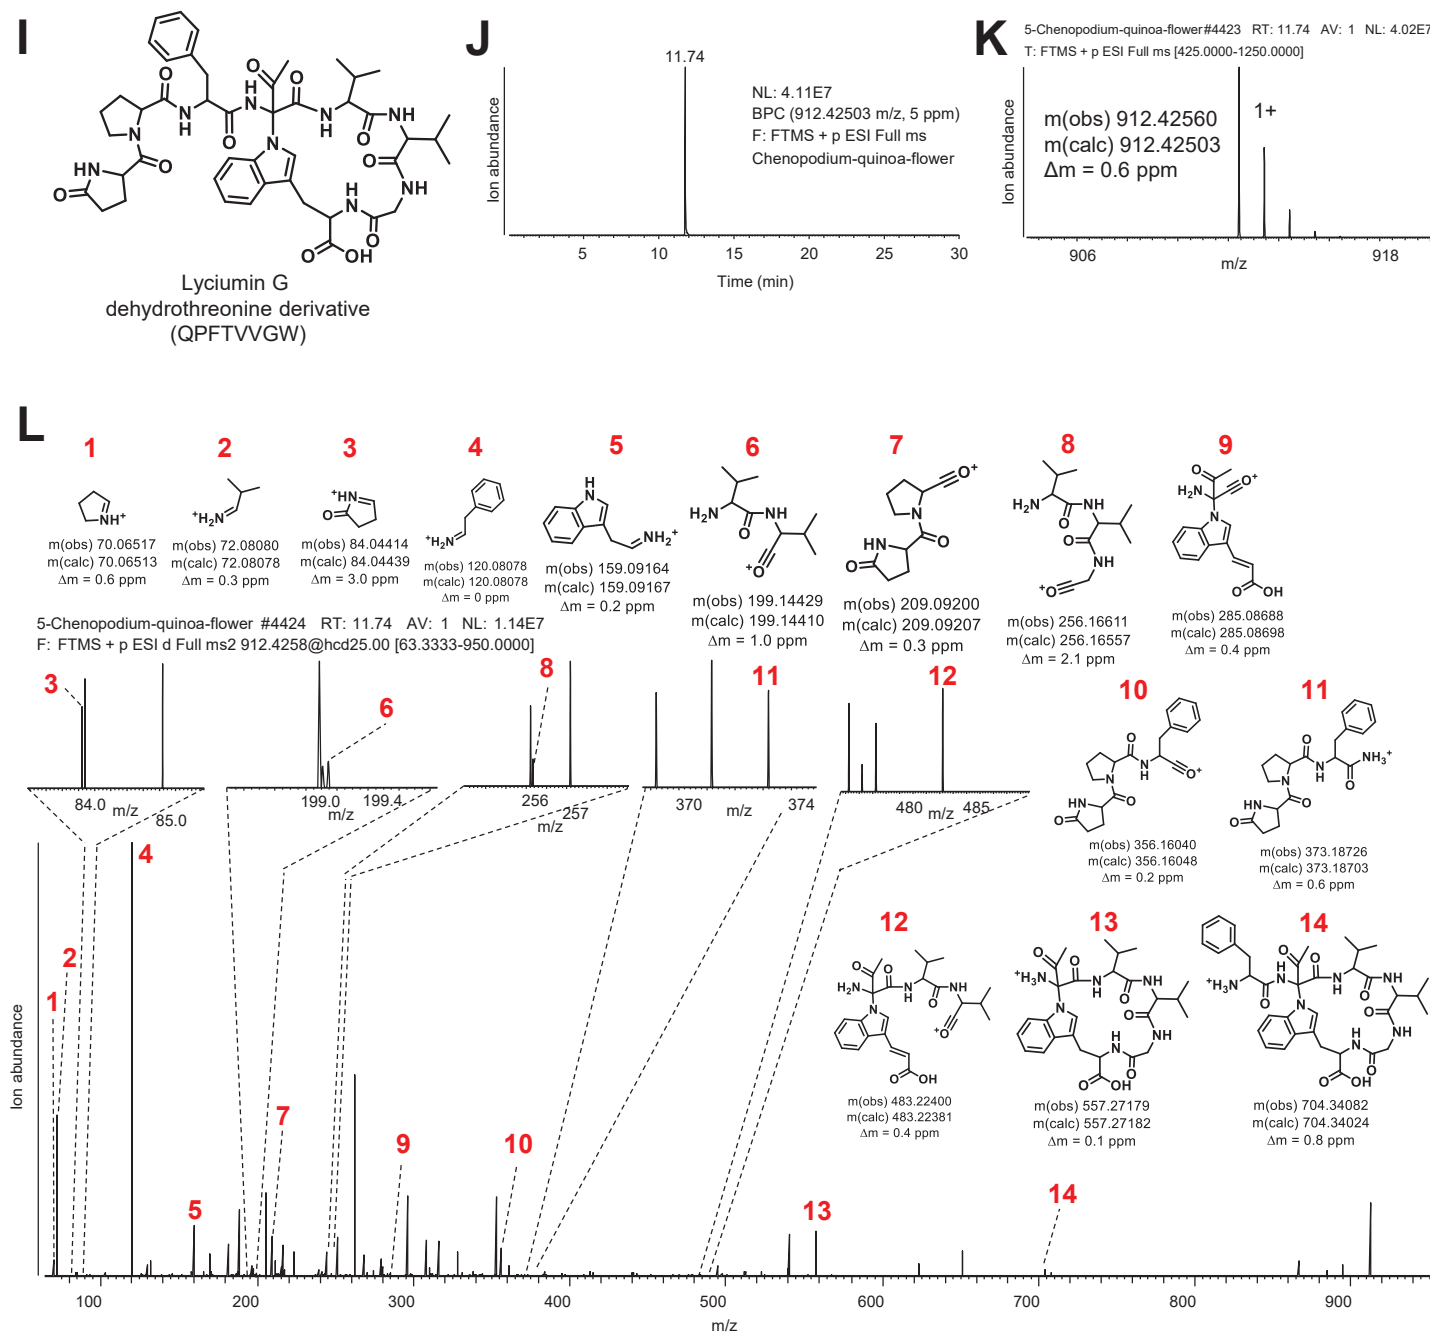

**Figure S27 | Detection of candidate dehydrothreonine-lyciumin derivatives in Amaranthaceae.** (I) Predicted *Chenopodium quinoa* lyciumin G dehydrothreonine derivative chemotype (core peptide). (J) LC-MS chemotyping of predicted lyciumin G dehydrothreonine derivative chemotype in peptide extract of *Chenopodium quinoa* flower. (K) MS analysis of predicted lyciumin G dehydrothreonine derivative chemotype of *Chenopodium quinoa*. (L) MS/MS analysis of predicted lyciumin G dehydrothreonine derivative chemotype of *Chenopodium quinoa*.

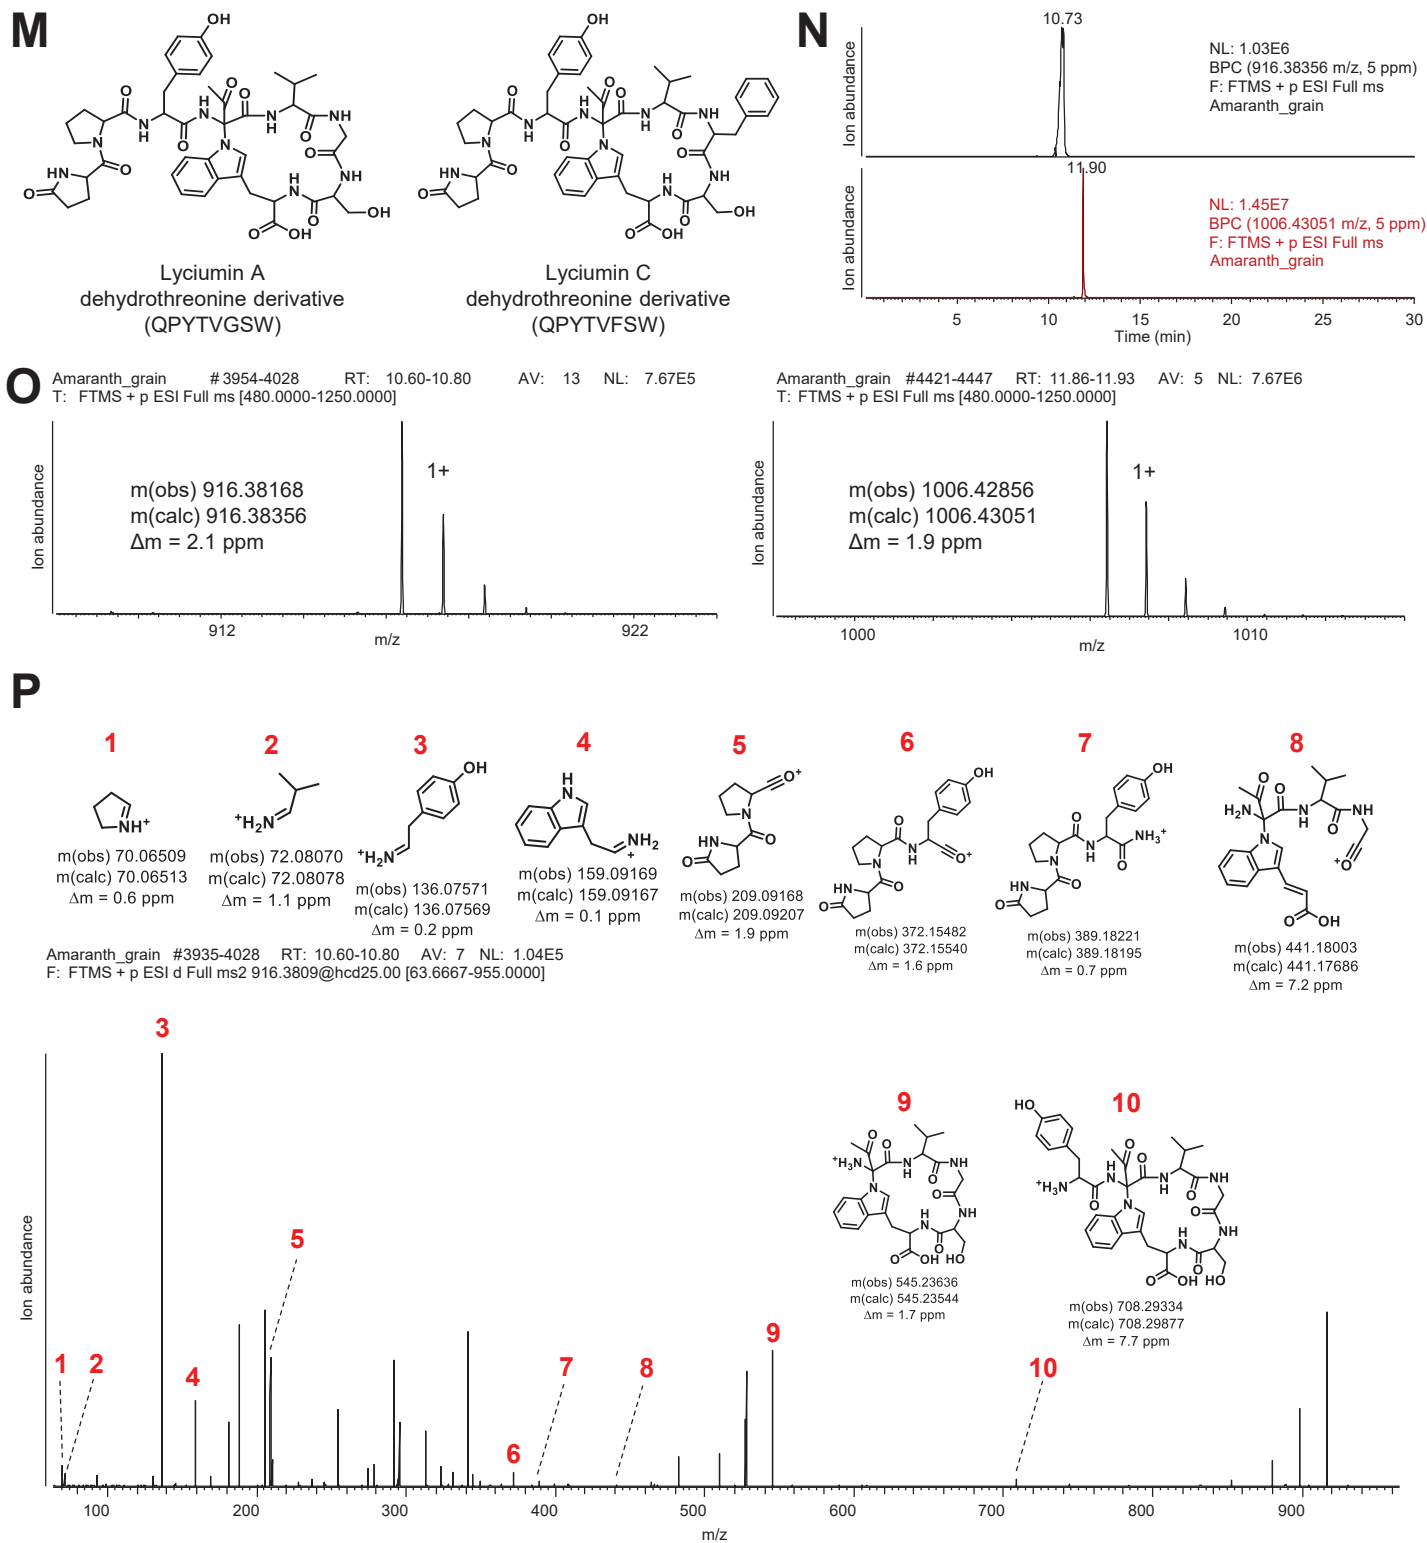

**Figure S27 | Detection of candidate dehydrothreonine-lyciumin derivatives in Amaranthaceae. (M)** Predicted *Amaranthus hypochondriacus* lyciumin A and C dehydrothreonine derivatives chemotypes (core peptide). **(N)** LC-MS chemotyping of predicted lyciumin A and C dehydrothreonine derivative chemotypes in peptide extract of *Amaranthus hypochondriacus* seeds. **(O)** MS analysis of predicted lyciumin A and C dehydrothreonine derivative chemotypes of *Amaranthus hypochondriacus*. **(P)** MS/MS analysis of predicted lyciumin A and C dehydrothreonine derivative chemotypes of *Amaranthus hypochondriacus*.

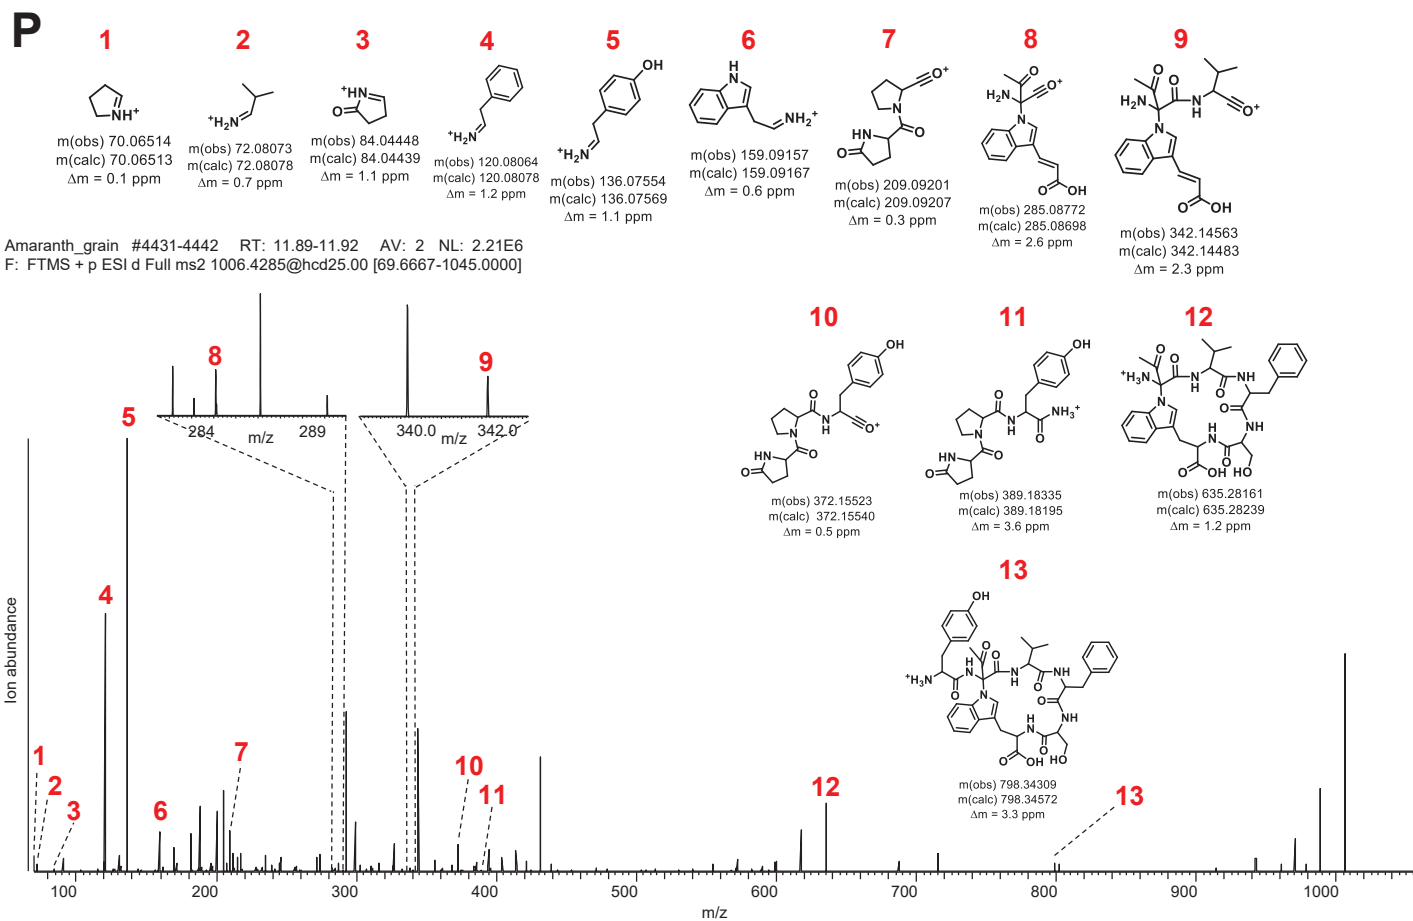

**Figure S27 | Detection of candidate dehydrothreonine-lyciumin derivatives in Amaranthaceae. (P) MS/MS analysis of predicted lyciumin A and C dehydrothreonine derivative chemotypes of *Amaranthus hypochondriacus*.**

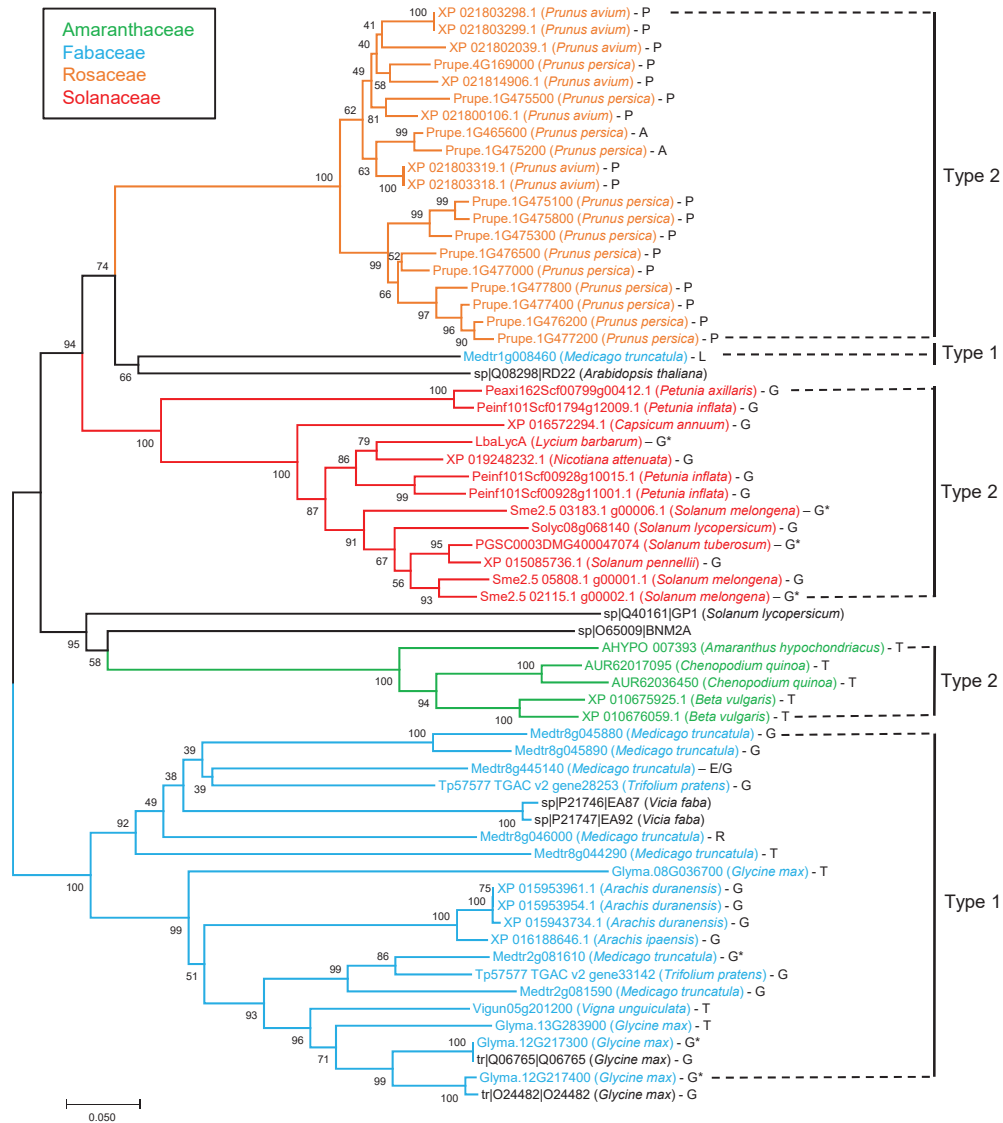

**Figure S28 | Phylogenetic analysis of predicted and characterized lyciumin precursors from analyzed plant genomes.** A neighbor-joining phylogenetic tree of the BURP-domain sequences of lyciumin precursors predicted from plant genomes and founding members of BURP domain protein family generated with 2000 bootstrap generations using the p-distance method. The scale measures evolutionary distances in substitutions per amino acid. Precursors with characterized chemotypes are noted with an asterisk. Predicted cyclization sites at the fourth core peptide position of precursor peptides are noted after species name as capital letter (Abbreviations: A – alanine, G – glycine, L – leucine, P – proline, R – arginine, T – threonine).

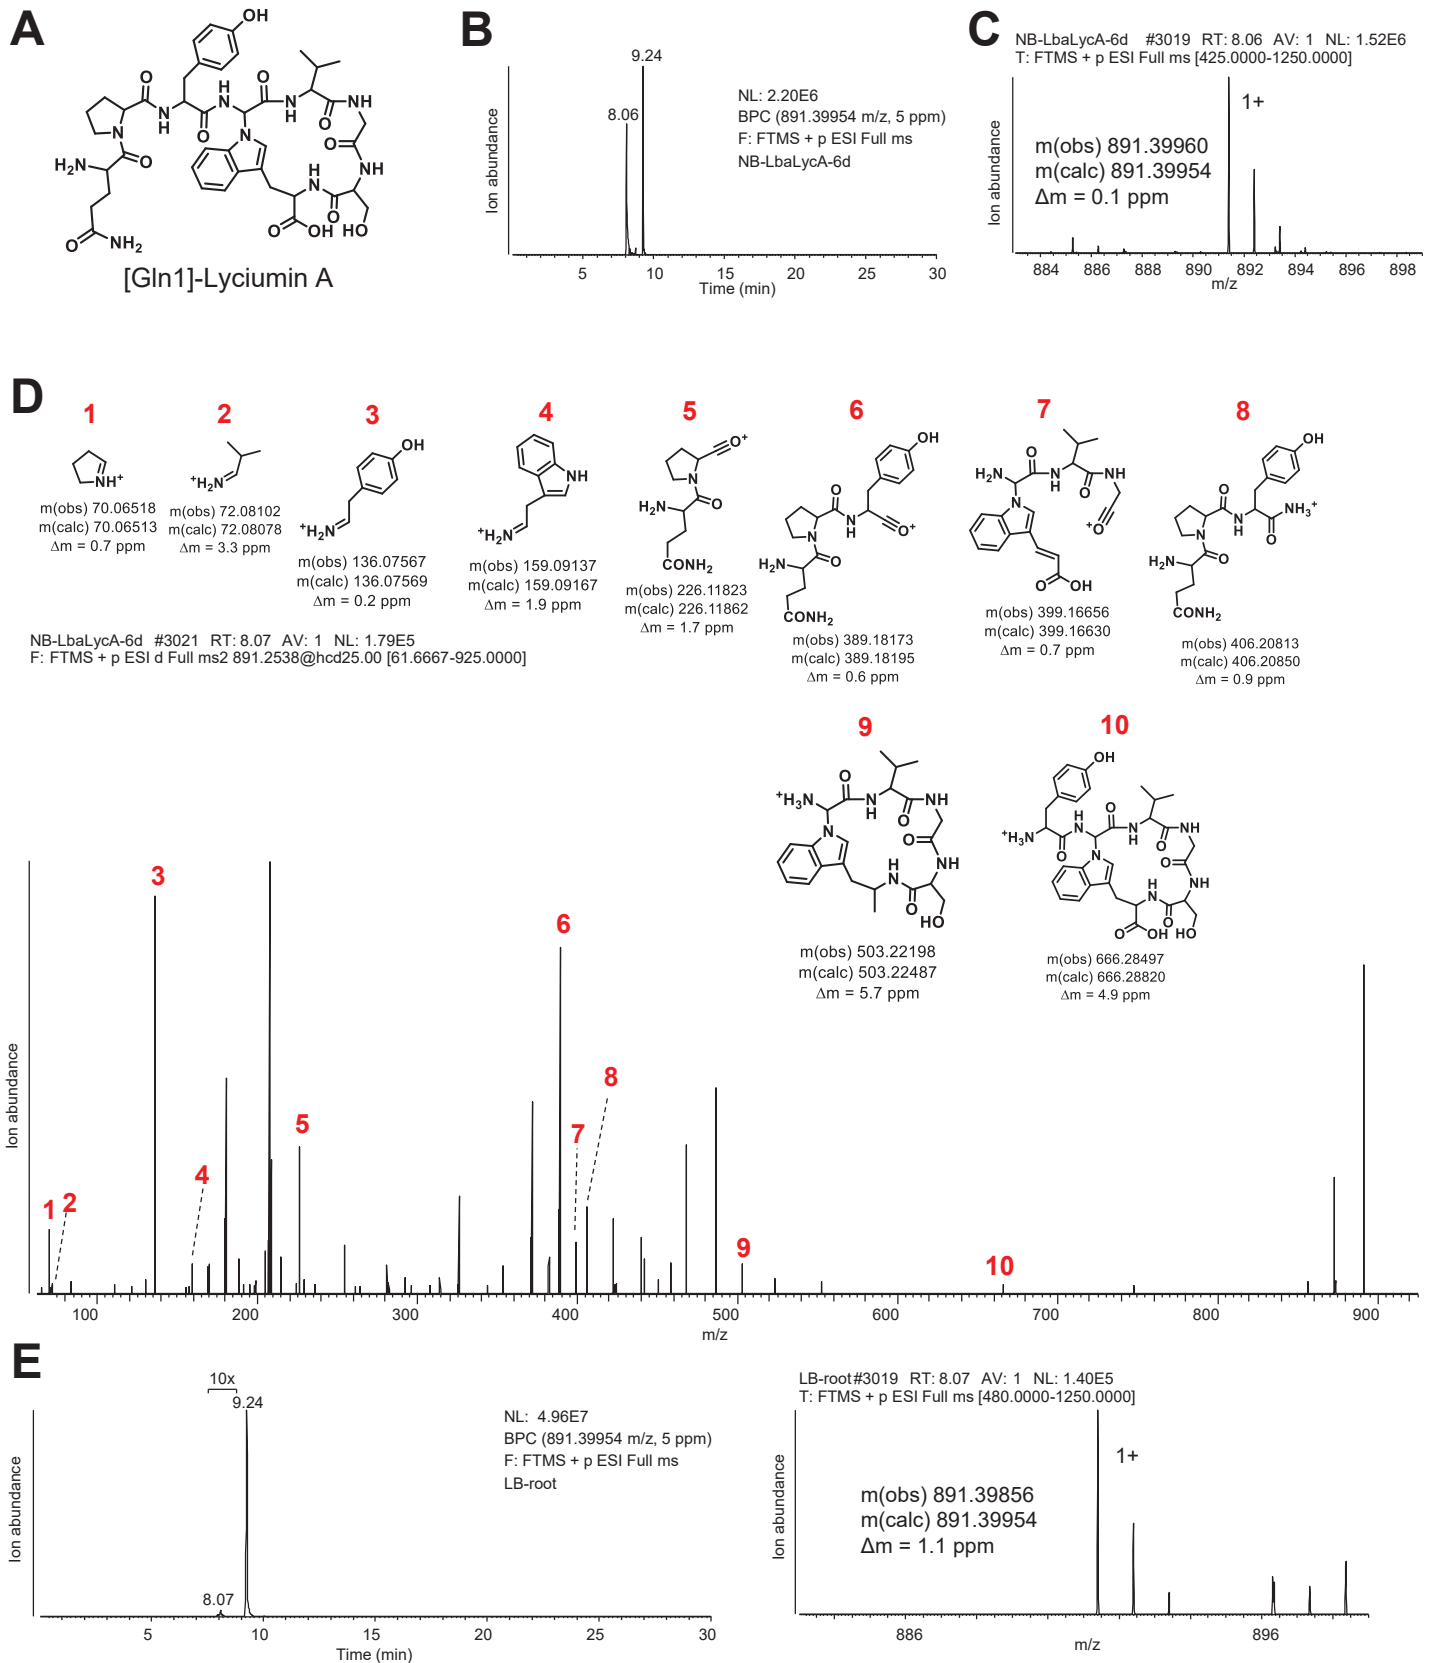

**Figure S29 | Detection of [Gln1]-lyciumins after heterologous expression of *LbaLycA* in *Nicotiana benthamiana*.** (A) [Gln1]-lyciumin A chemotype. (B) LC-MS chemotyping of [Gln1]-lyciumin A chemotype in peptide extract of *N. benthamiana* six days after infiltration with *A. tumefaciens* LBA4404 pEAQ-HT-*LbaLycA*. (C) MS analysis of [Gln1]-lyciumin A chemotype in peptide extract of *N. benthamiana* six days after infiltration with *A. tumefaciens* LBA4404 pEAQ-HT-*LbaLycA*. (D) MS/MS analysis [Gln1]-lyciumin A chemotype in peptide extract of *N. benthamiana* leaves six days after infiltration with *A. tumefaciens* LBA4404 pEAQ-HT-*LbaLycA*. (E) LC-MS chemotyping of [Gln1]-lyciumin A chemotype in peptide extract of *Lycium barbarum* root.

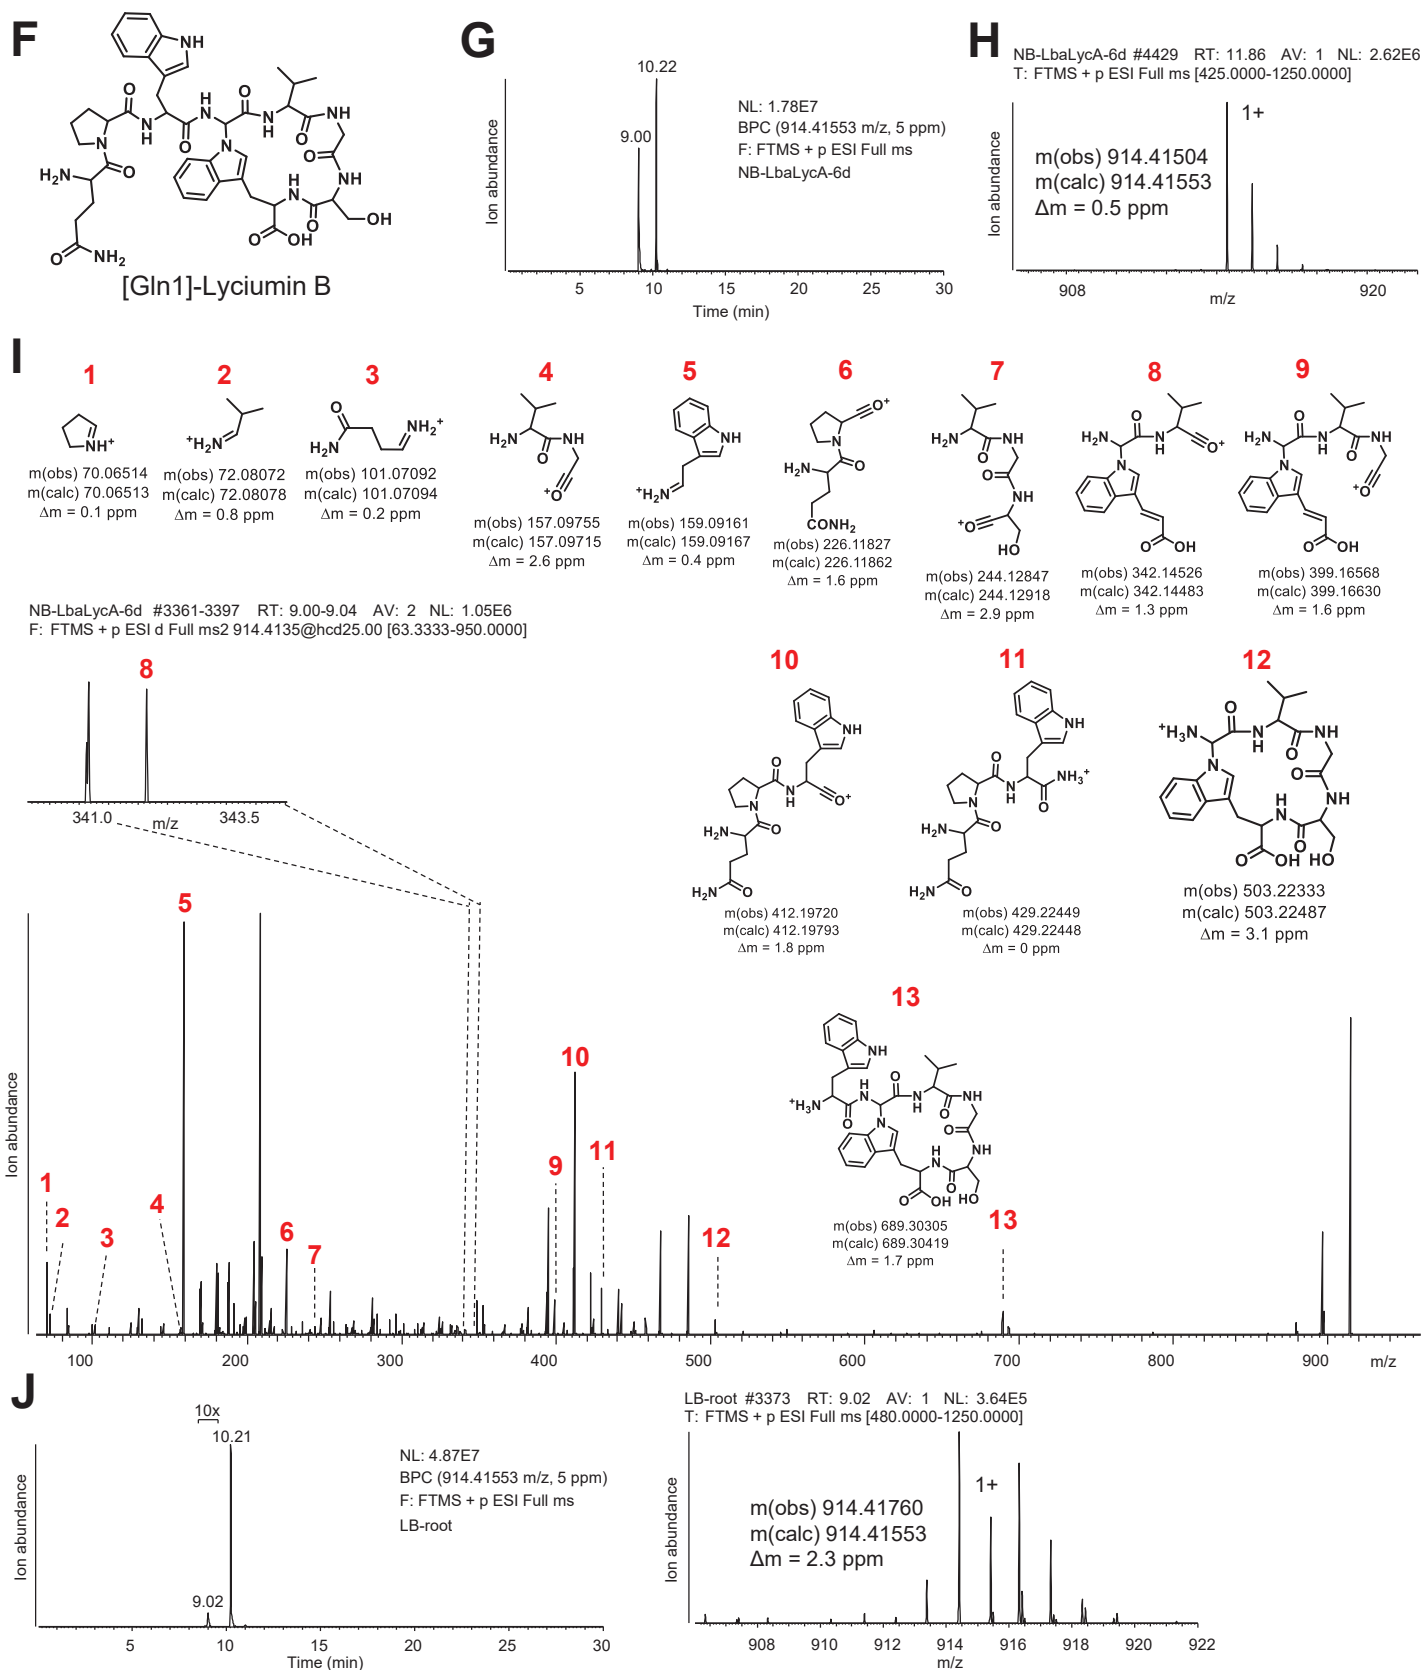

**Figure S29 | Detection of [Gln1]-lyciumins after heterologous expression of *LbaLycA* in *Nicotiana benthamiana*.** (F) [Gln1]-lyciumin B chemotype. (G) LC-MS chemotyping of [Gln1]-lyciumin B chemotype in peptide extract of *N. benthamiana* six days after infiltration with *A. tumefaciens* LBA4404 pEAQ-HT-*LbaLycA*. (H) MS analysis of [Gln1]-lyciumin B chemotype in peptide extract of *N. benthamiana* six days after infiltration with *A. tumefaciens* LBA4404 pEAQ-HT-*LbaLycA*. (I) MS/MS analysis [Gln1]-lyciumin B chemotype in peptide extract of *N. benthamiana* six days after infiltration with *A. tumefaciens* LBA4404 pEAQ-HT-*LbaLycA*. (J) LC-MS chemotyping of [Gln1]-lyciumin B chemotype in peptide extract of *Lycium barbarum* root.

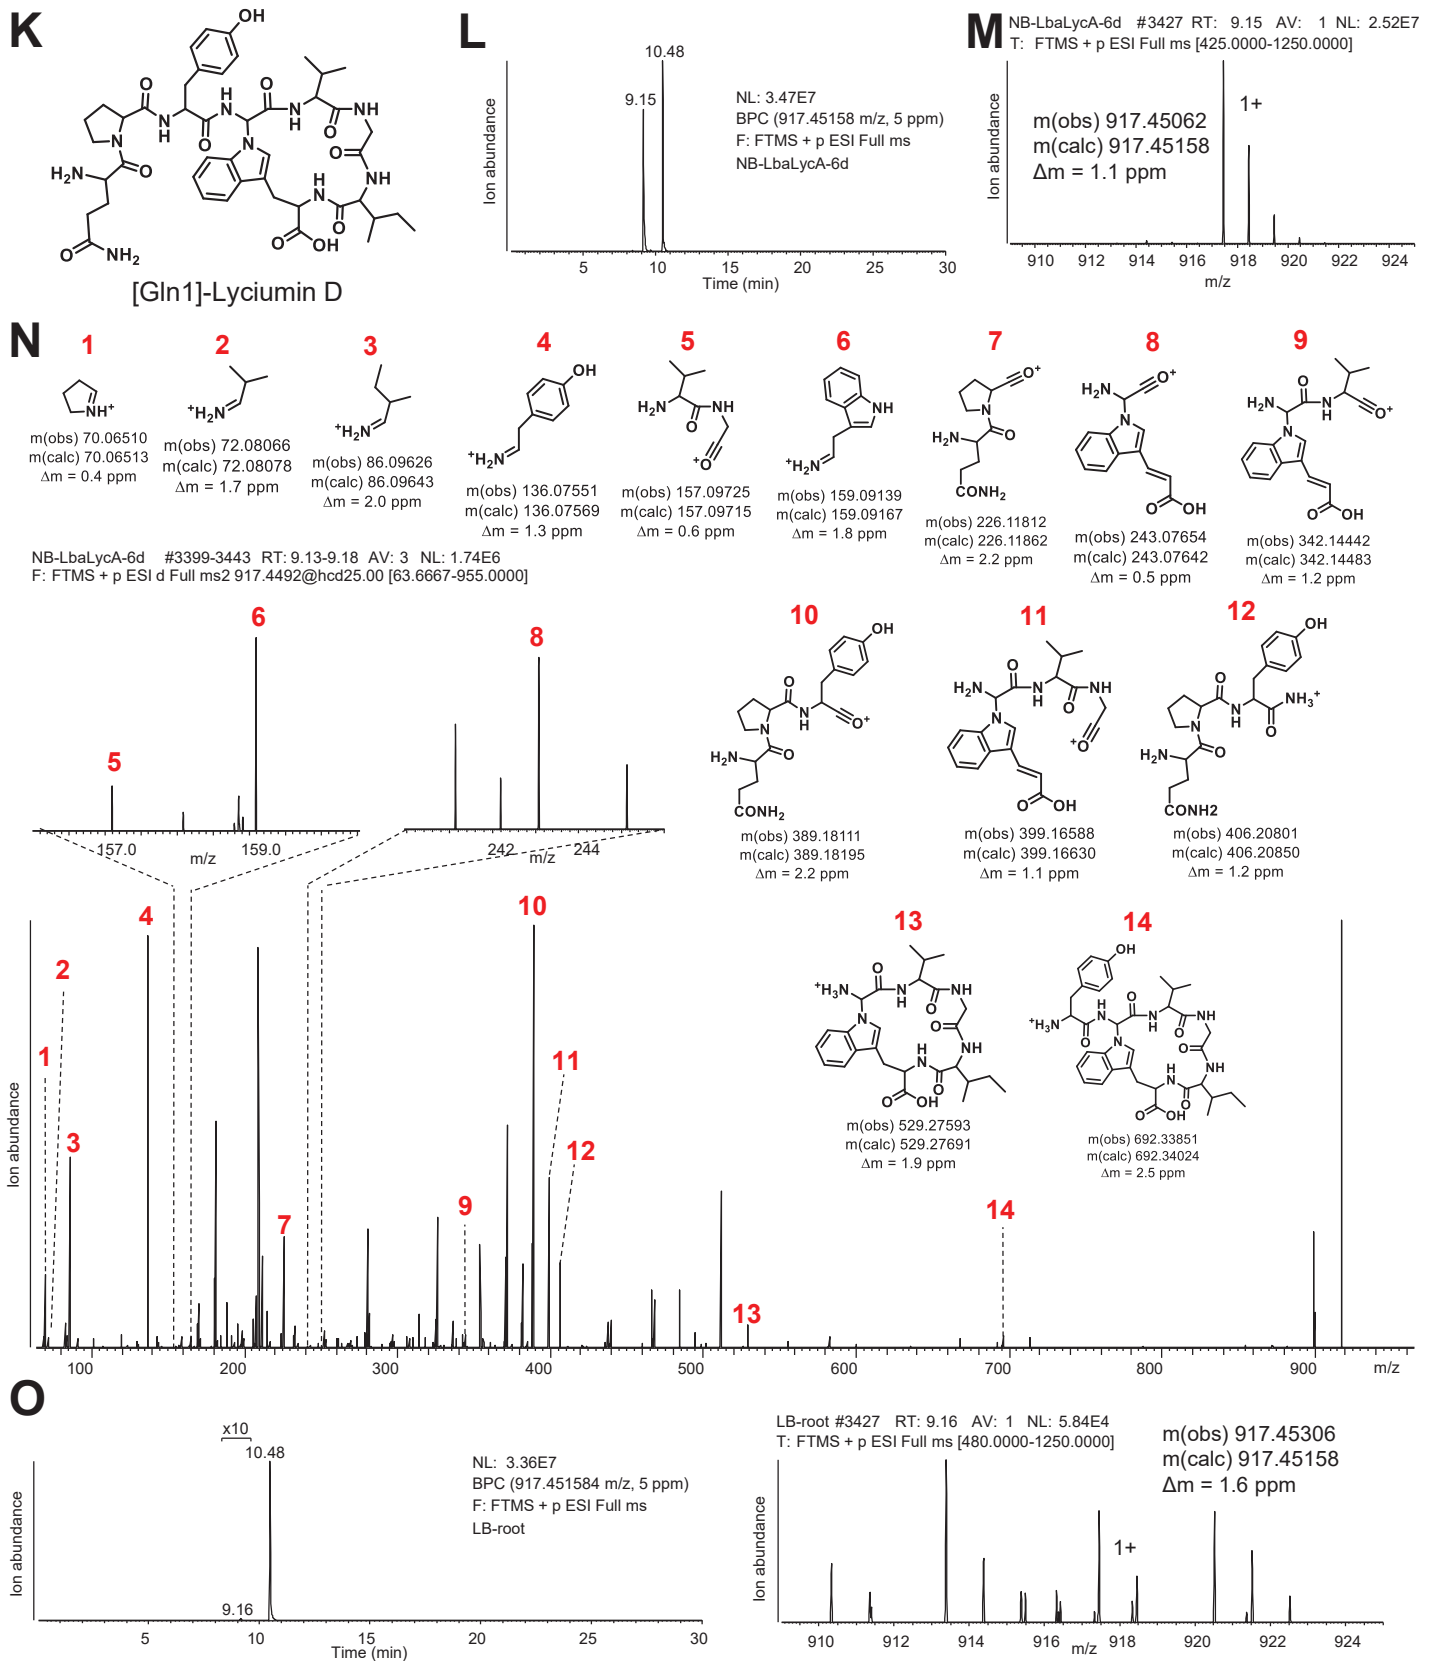

**Figure S29 | Detection of [Gln1]-lyciumins after heterologous expression of *LbaLycA* in *Nicotiana benthamiana*.** (K) [Gln1]-lyciumin D chemotype. (L) LC-MS chemotyping of [Gln1]-lyciumin D chemotype in peptide extract of *N. benthamiana* six days after infiltration with *A. tumefaciens* LBA4404 pEAQ-HT-*LbaLycA*. (M) MS analysis of [Gln1]-lyciumin D chemotype in peptide extract of *N. benthamiana* six days after infiltration with *A. tumefaciens* LBA4404 pEAQ-HT-*LbaLycA*. (N) MS/MS analysis [Gln1]-lyciumin D chemotype in peptide extract of *N. benthamiana* six days after infiltration with *A. tumefaciens* LBA4404 pEAQ-HT-*LbaLycA*. (O) LC-MS chemotyping of [Gln1]-lyciumin D chemotype in peptide extract of *Lycium barbarum* root.



**A**

&gt;LbaQC

MPLLNPRFLVISLIVLLSITVFREAEASYRVYKVKVVNEFPHPDQAYTQGLLYAENNTLFESTGLYGRSSVRKVALLDGKVERLHEMESSYFGEGLTLLGE  
 RLFQLTWLLDTGFIYDRYNFSKFKKFTTHMQDGWGLATDGKVLFGSDGTSTLYKIDPKTMKVIRKQVVKSQGHEVRYLNELEYVKAEVWANVYVTDCIARI  
 SPKDGTVIGWILLQSLREELISRGYKDFEVLNGIAWDRDGRIFVTGKLPKLFKIKLLPLTPNDPLAGEINNLICIPKTSFLEI

**B**

| Gene           | Size [aa] | RSEM [TPM] | Transcript rank (Total transcript #) | Similarity/Identity [%/%] to precursor co-localized <i>Chenopodium quinoa</i> QC (AUR62017096-RA) |
|----------------|-----------|------------|--------------------------------------|---------------------------------------------------------------------------------------------------|
| <i>LbaQC</i>   | 287       | 42         | 3365 (100355)                        | 72/61                                                                                             |
| <i>LbaLycA</i> | 543       | 13397      | 13 (100355)                          | -                                                                                                 |

**Figure S30 | Characterization of *Lycium barbarum* glutamine cyclotransferase (LbaQC).** (A) LbaQC sequence with predicted secretory pathway signaling peptide underlined (SignalP v4.1). (B) Bioinformatic analysis of candidate lyciumin-glutamine cyclotransferase LbaQC from root transcriptome of *Lycium barbarum*.

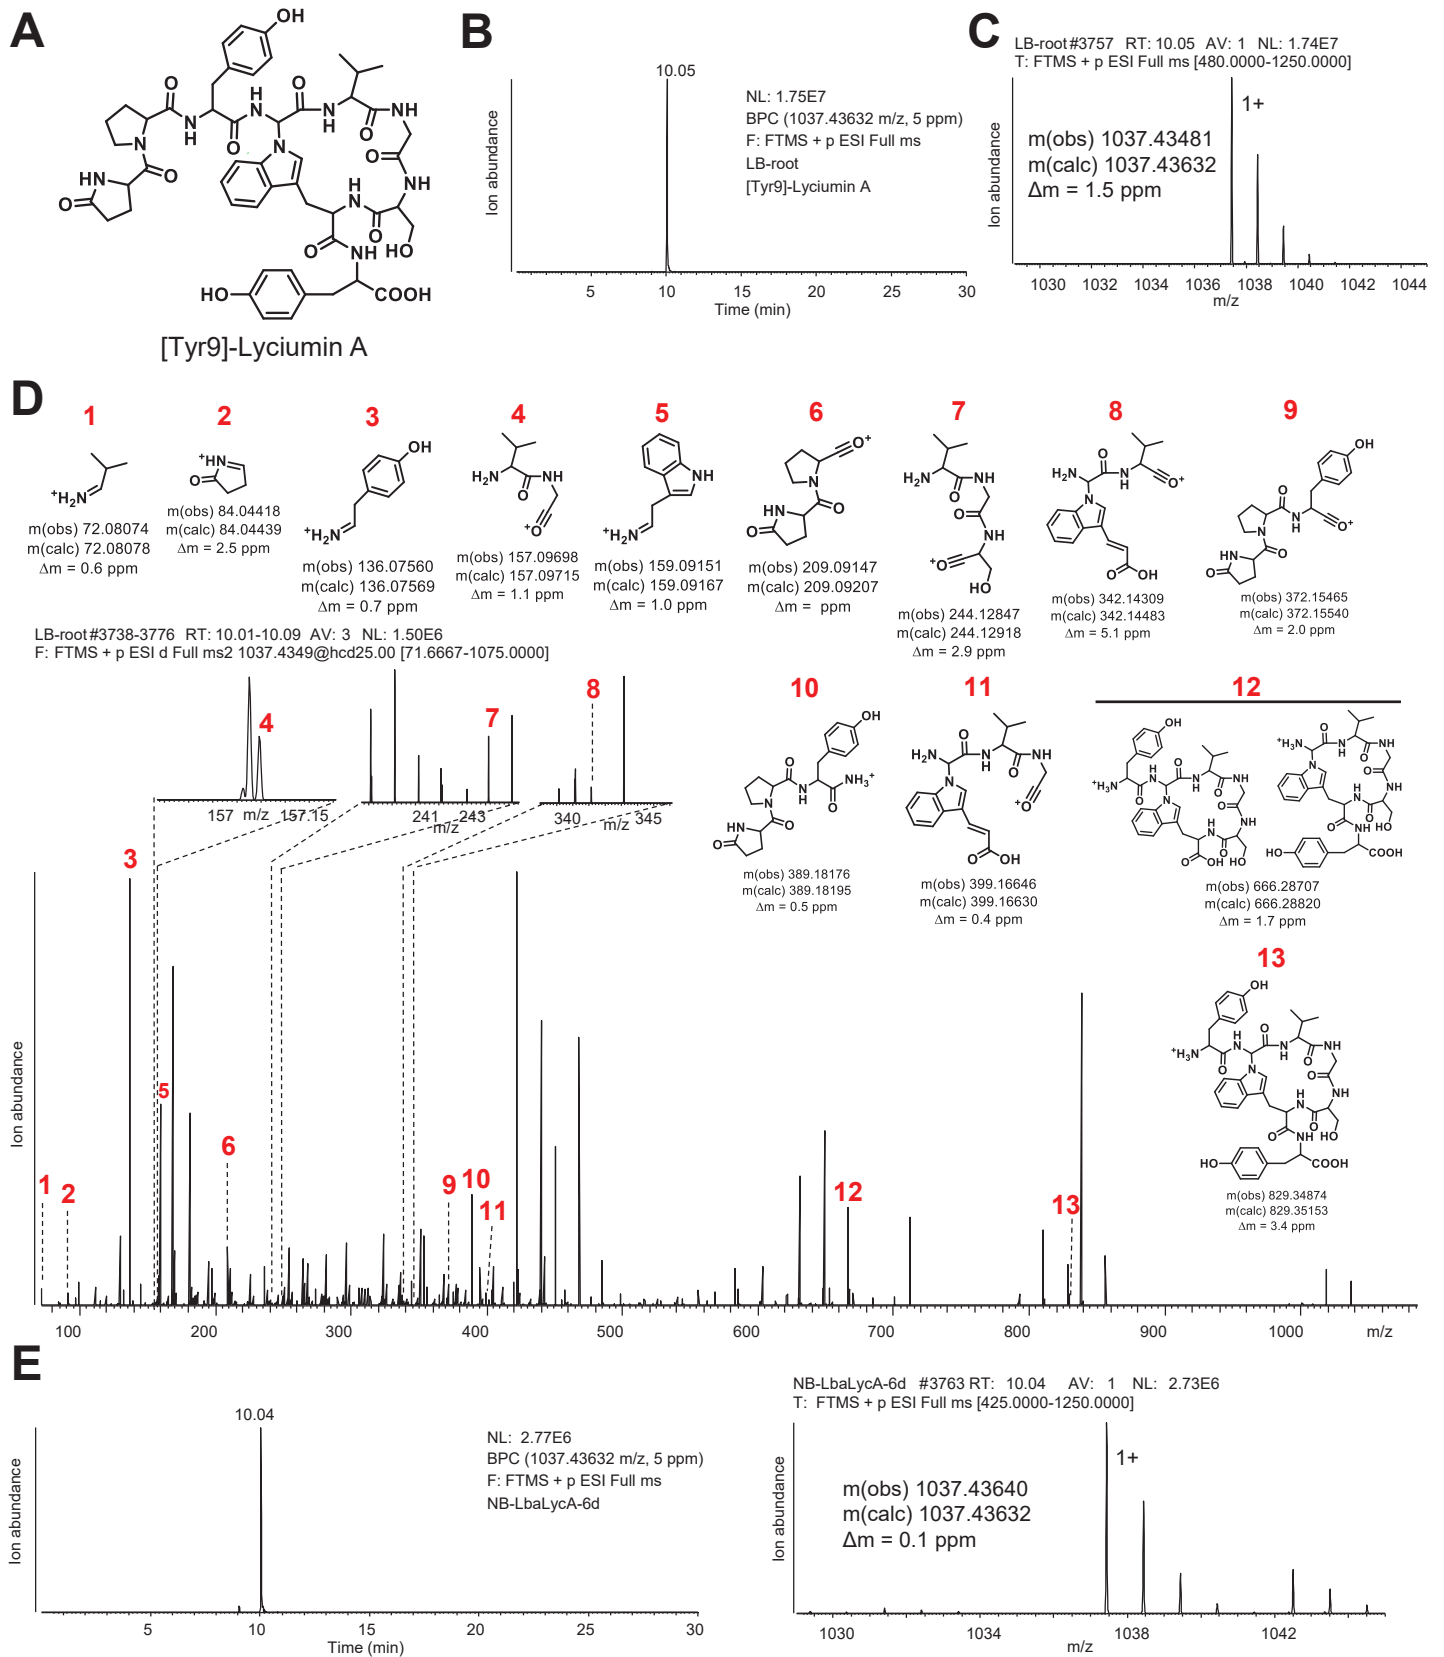

**Figure S31 | Detection of C-terminally extended lyciumins after *LbaLycA* heterologous expression in *Nicotiana benthamiana*.** (A) [Tyr9]-lyciumin A chemotype. (B) LC-MS chemotyping of [Tyr9]-lyciumin A chemotype in peptide extract of *Lycium barbarum* root. (C) MS analysis of [Tyr9]-lyciumin A chemotype in peptide extract of *Lycium barbarum* root. (D) MS/MS analysis [Tyr9]-lyciumin A chemotype in peptide extract of *Lycium barbarum* root. (E) LC-MS chemotyping of [Tyr9]-lyciumin A chemotype in peptide extract of *N. benthamiana* six days after infiltration with *A. tumefaciens* LBA4404 pEAQ-HT-*LbaLycA*.

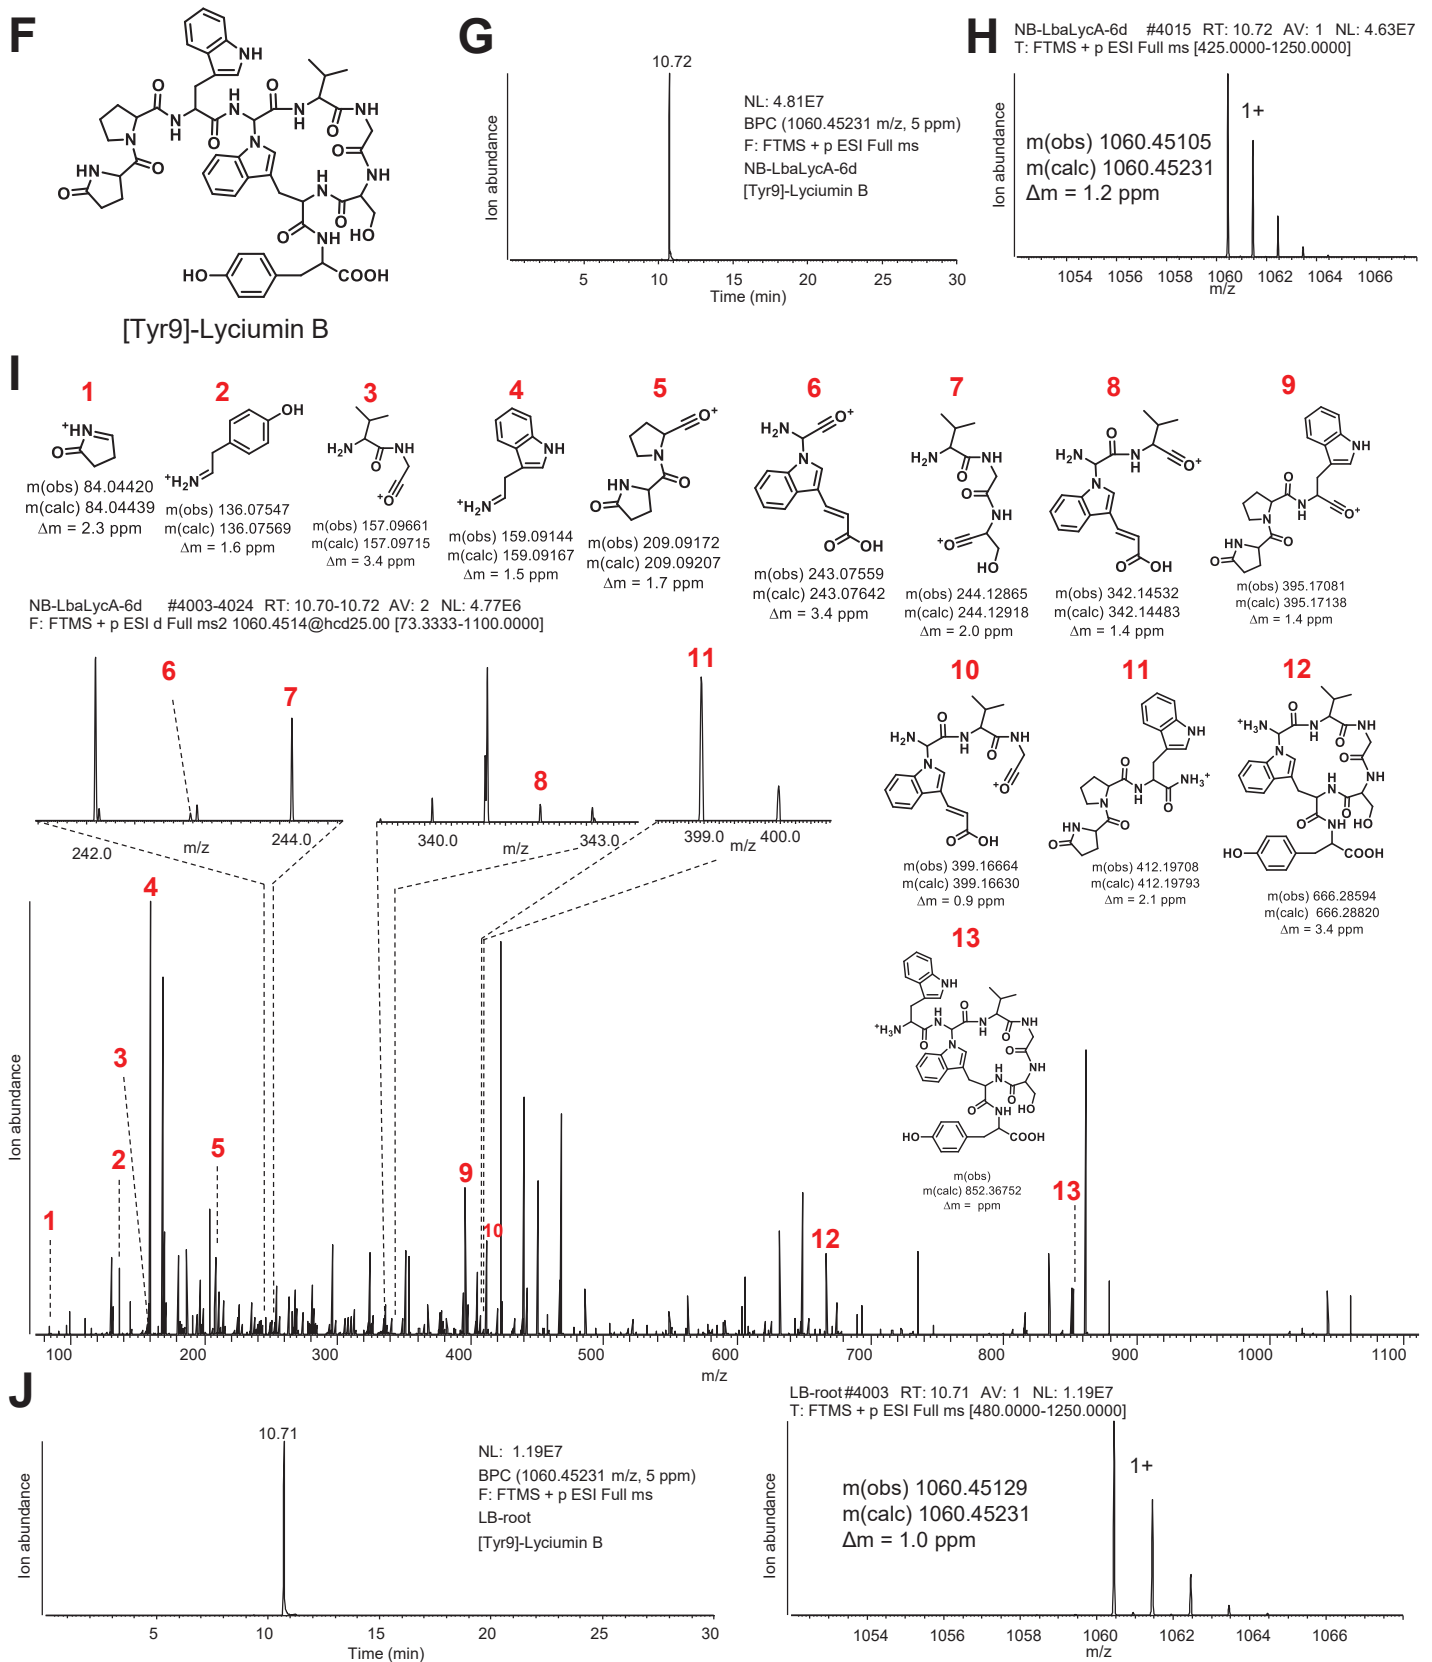

**Figure S31 | Detection of C-terminally extended lyciumins after *LbaLycA* heterologous expression in *Nicotiana benthamiana*.** (F) [Tyr9]-lyciumin B chemotype. (G) LC-MS chemotyping of [Tyr9]-lyciumin B chemotype in peptide extract of *N. benthamiana* six days after infiltration with *A. tumefaciens* LBA4404 pEAQ-HT-*LbaLycA*. (H) MS analysis of [Tyr9]-lyciumin B chemotype in peptide extract of *N. benthamiana* six days after infiltration with *A. tumefaciens* LBA4404 pEAQ-HT-*LbaLycA*. (I) MS/MS analysis [Tyr9]-lyciumin B chemotype in peptide extract of *N. benthamiana* six days after infiltration with *A. tumefaciens* LBA4404 pEAQ-HT-*LbaLycA*. (J) LC-MS chemotyping of [Tyr9]-lyciumin B chemotype in peptide extract of *Lycium barbarum* root.

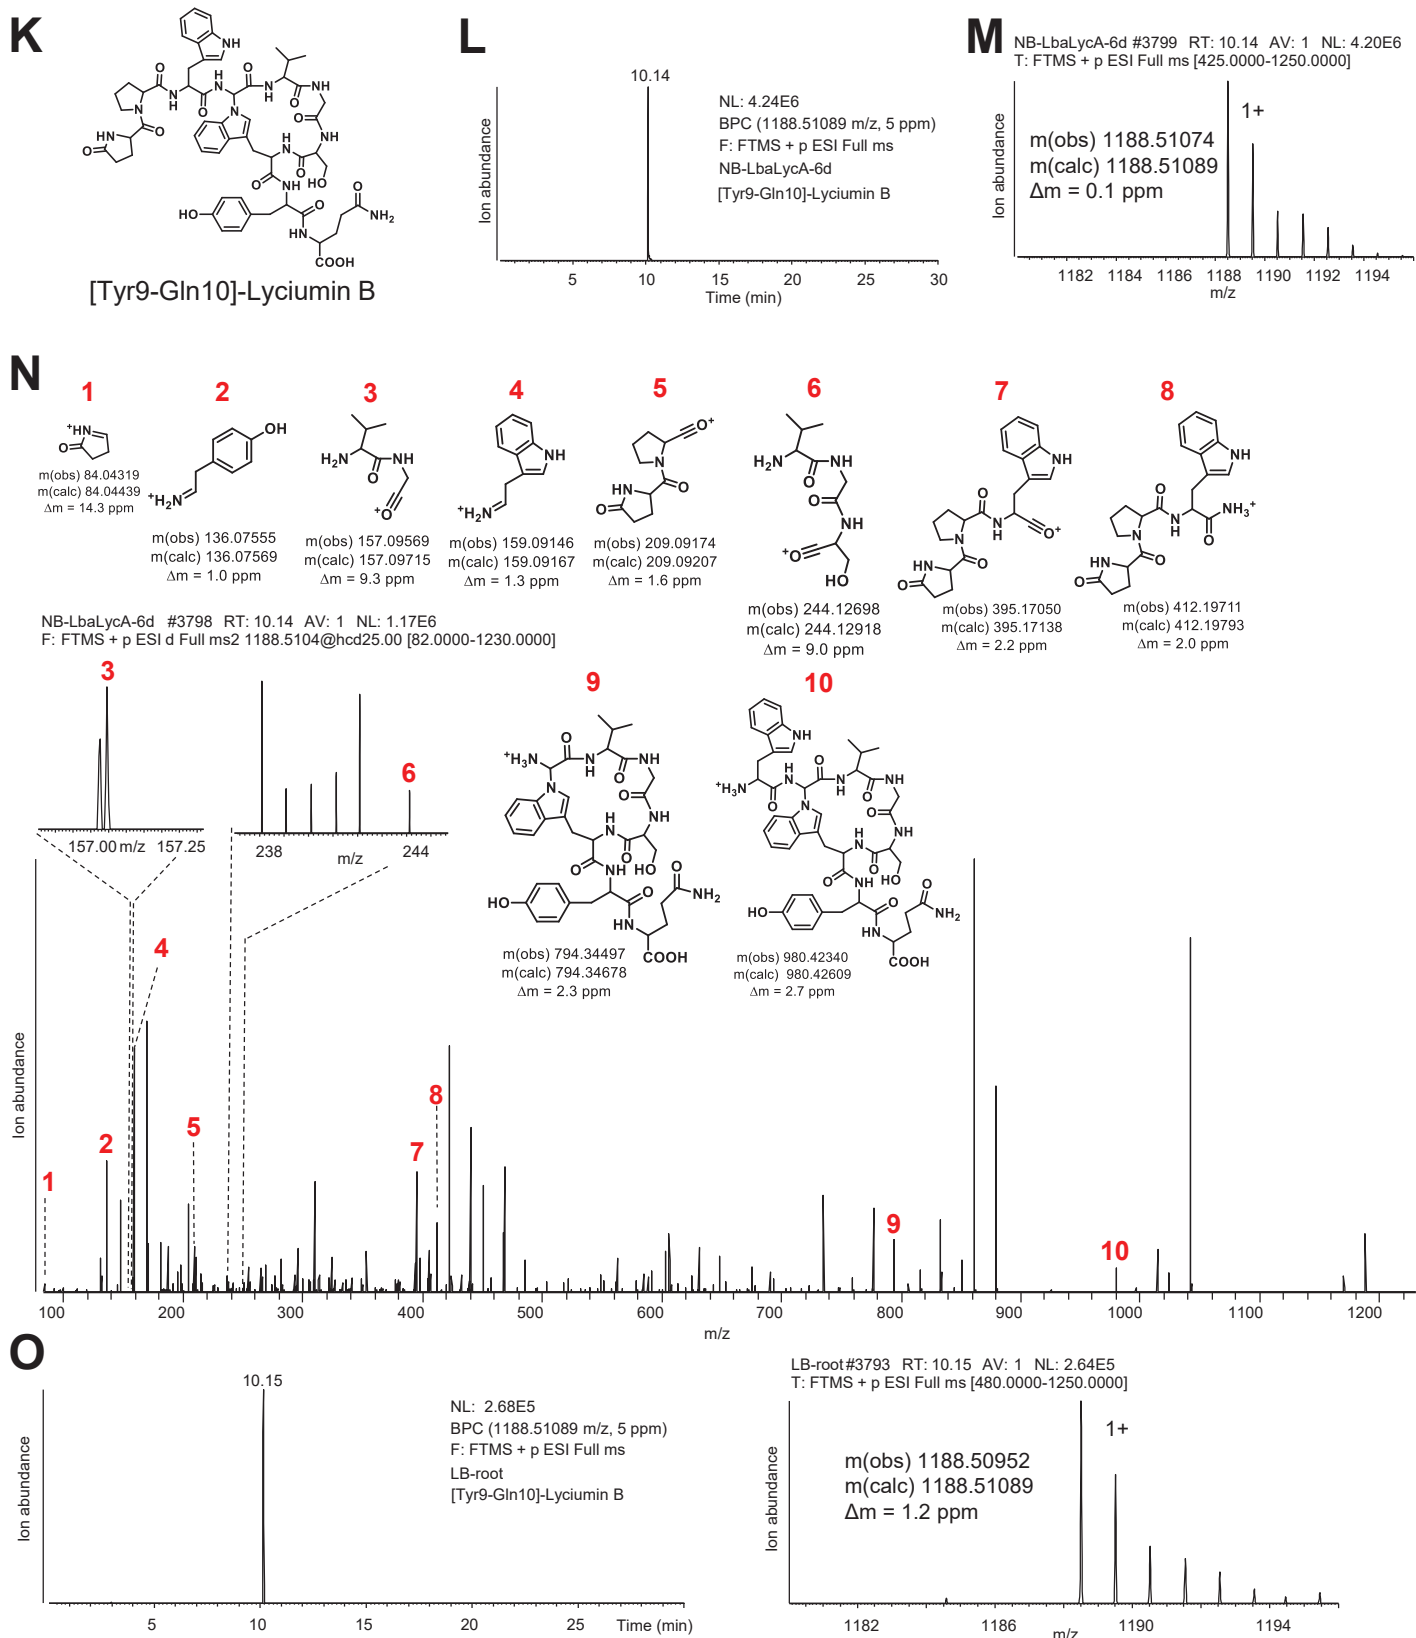

**Figure S31 | Detection of C-terminally extended lyciumins after *LbaLycA* heterologous expression in *Nicotiana benthamiana*.** (K) [Tyr9-Gln10]-lyciumin B chemotype. (L) LC-MS chemotyping of [Tyr9-Gln10]-lyciumin B chemotype in peptide extract of *N. benthamiana* six days after infiltration with *A. tumefaciens* LBA4404 pEAQ-HT-*LbaLycA*. (M) MS analysis of [Tyr9-Gln10]-lyciumin B chemotype in peptide extract of *N. benthamiana* six days after infiltration with *A. tumefaciens* LBA4404 pEAQ-HT-*LbaLycA*. (N) MS/MS analysis [Tyr9-Gln10]-lyciumin B chemotype in peptide extract of *N. benthamiana* six days after infiltration with *A. tumefaciens* LBA4404 pEAQ-HT-*LbaLycA*. (O) LC-MS chemotyping of [Tyr9-Gln10]-lyciumin B chemotype in peptide extract of *Lycium barbarum* root.

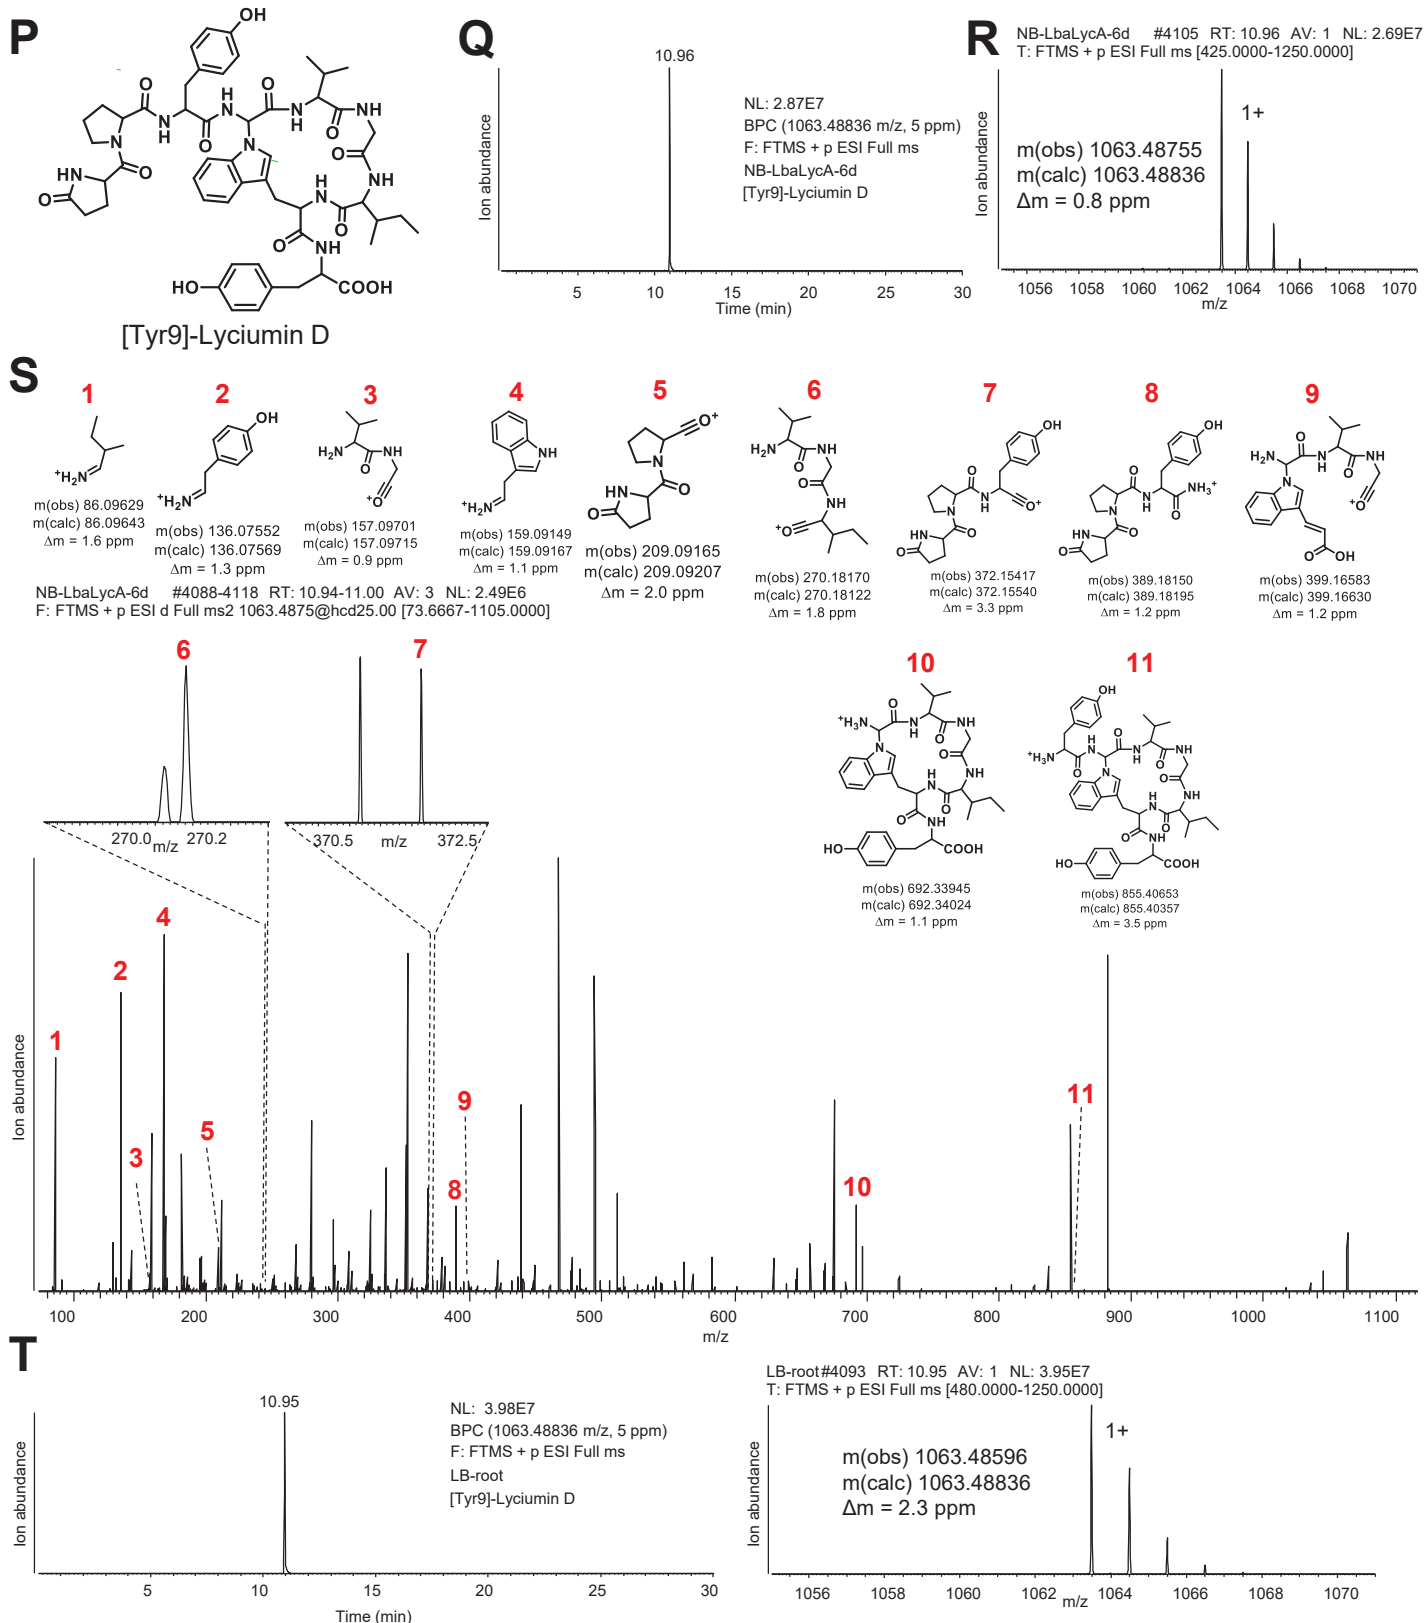

**Figure S31 | Detection of C-terminally extended lyciumins after *LbaLycA* heterologous expression in *Nicotiana benthamiana*.** (P) [Tyr9]-lyciumin D chemotype. (Q) LC-MS chemotyping of [Tyr9]-lyciumin D chemotype in peptide extract of *N. benthamiana* six days after infiltration with *A. tumefaciens* LBA4404 pEAQ-HT-*LbaLycA*. (R) MS analysis of [Tyr9]-lyciumin D chemotype in peptide extract of *N. benthamiana* six days after infiltration with *A. tumefaciens* LBA4404 pEAQ-HT-*LbaLycA*. (S) MS/MS analysis [Tyr9]-lyciumin D chemotype in peptide extract of *N. benthamiana* six days after infiltration with *A. tumefaciens* LBA4404 pEAQ-HT-*LbaLycA*. (T) LC-MS chemotyping of [Tyr9]-lyciumin D chemotype in peptide extract of *Lycium barbarum* root.

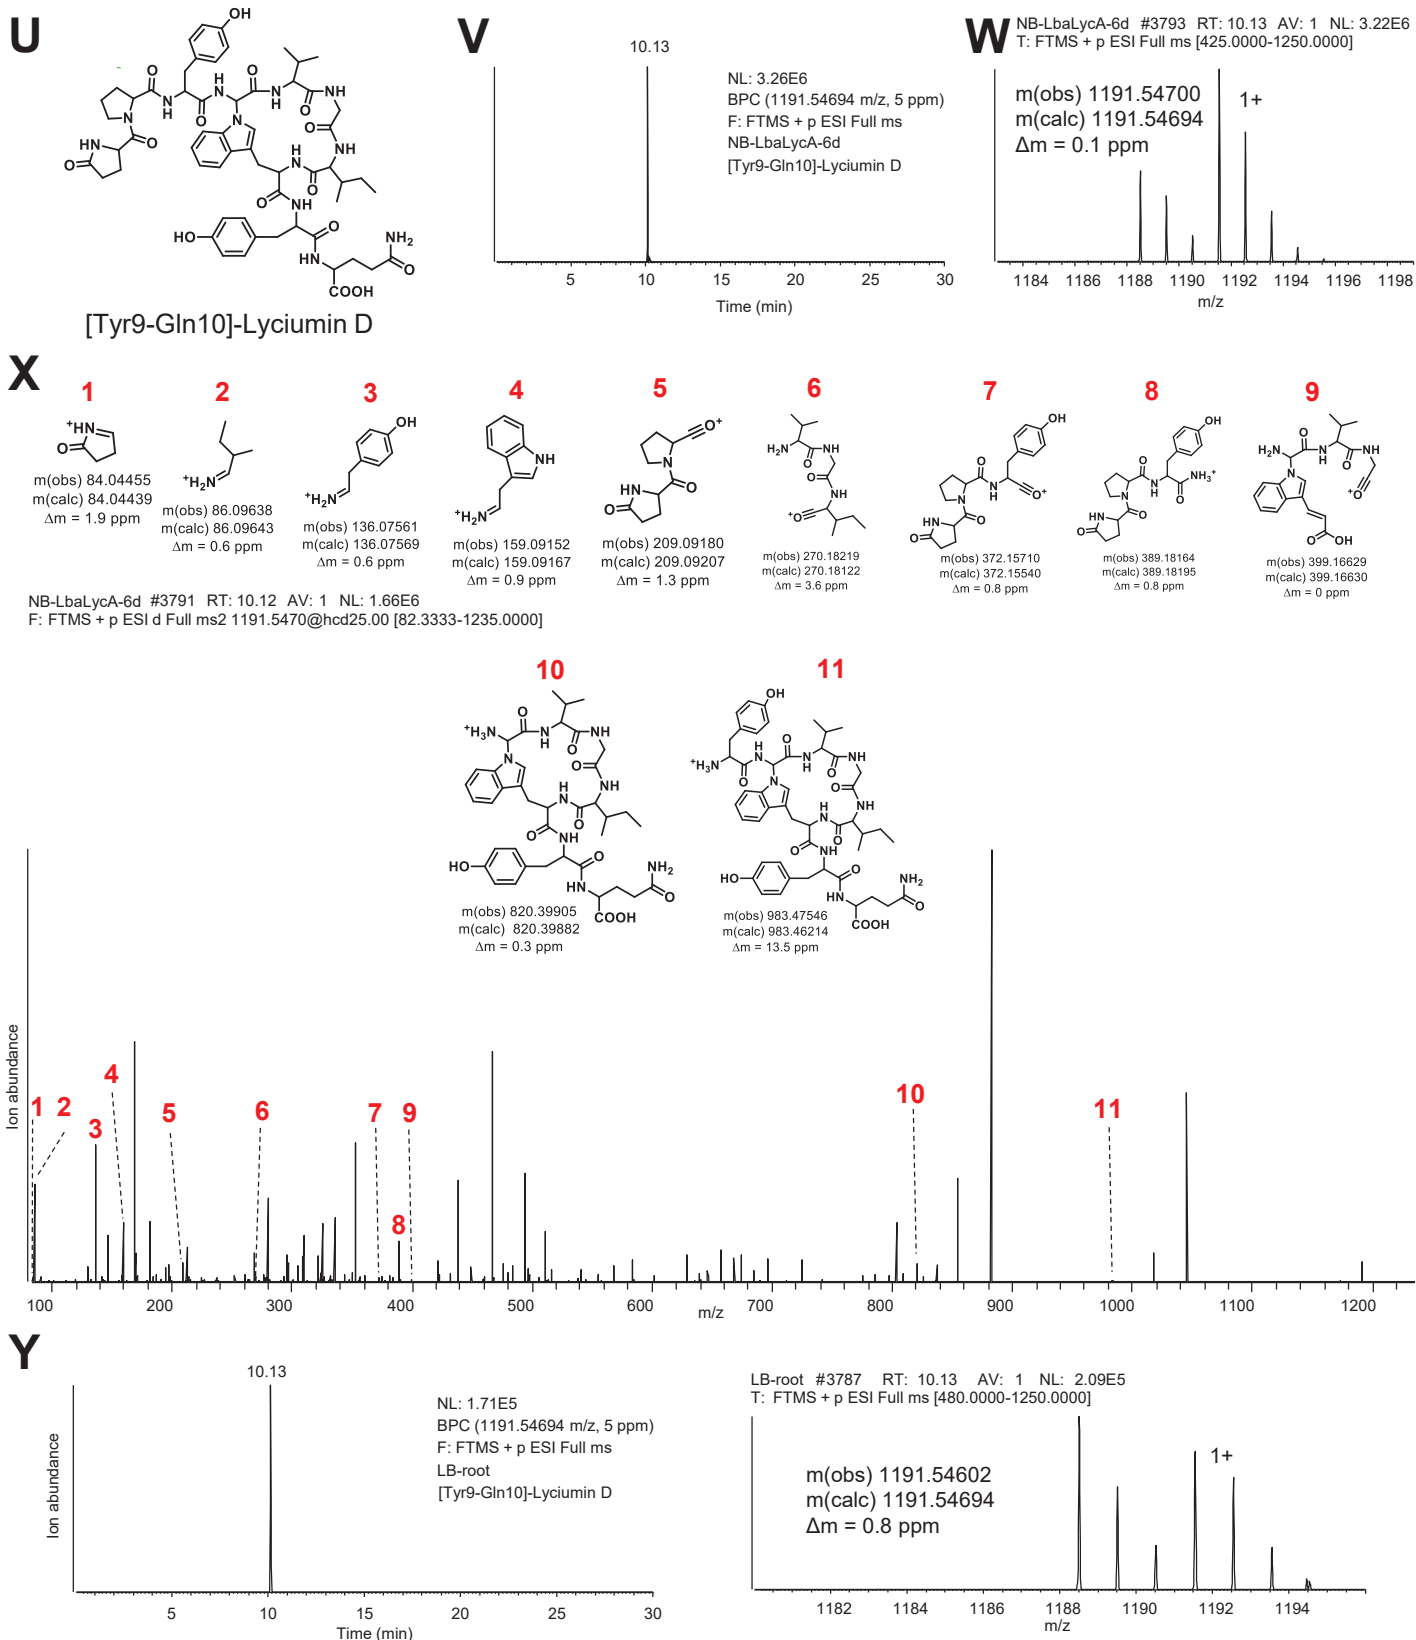

**Figure S31 | Detection of C-terminally extended lyciumins after *LbaLycA* heterologous expression in *Nicotiana benthamiana*.** (U) [Tyr9-Gln10]-lyciumin D chemotype. (V) LC-MS chemotyping of [Tyr9-Gln10]-lyciumin D chemotype in peptide extract of *N. benthamiana* six days after infiltration with *A. tumefaciens* LBA4404 pEAQ-HT-*LbaLycA*. (W) MS analysis of [Tyr9-Gln10]-lyciumin D chemotype in peptide extract of *N. benthamiana* six days after infiltration with *A. tumefaciens* LBA4404 pEAQ-HT-*LbaLycA*. (X) MS/MS analysis [Tyr9-Gln10]-lyciumin D chemotype in peptide extract of *N. benthamiana* six days after infiltration with *A. tumefaciens* LBA4404 pEAQ-HT-*LbaLycA*. (Y) LC-MS chemotyping of [Tyr9-Gln10]-lyciumin D chemotype in peptide extract of *Lycium barbarum* root.

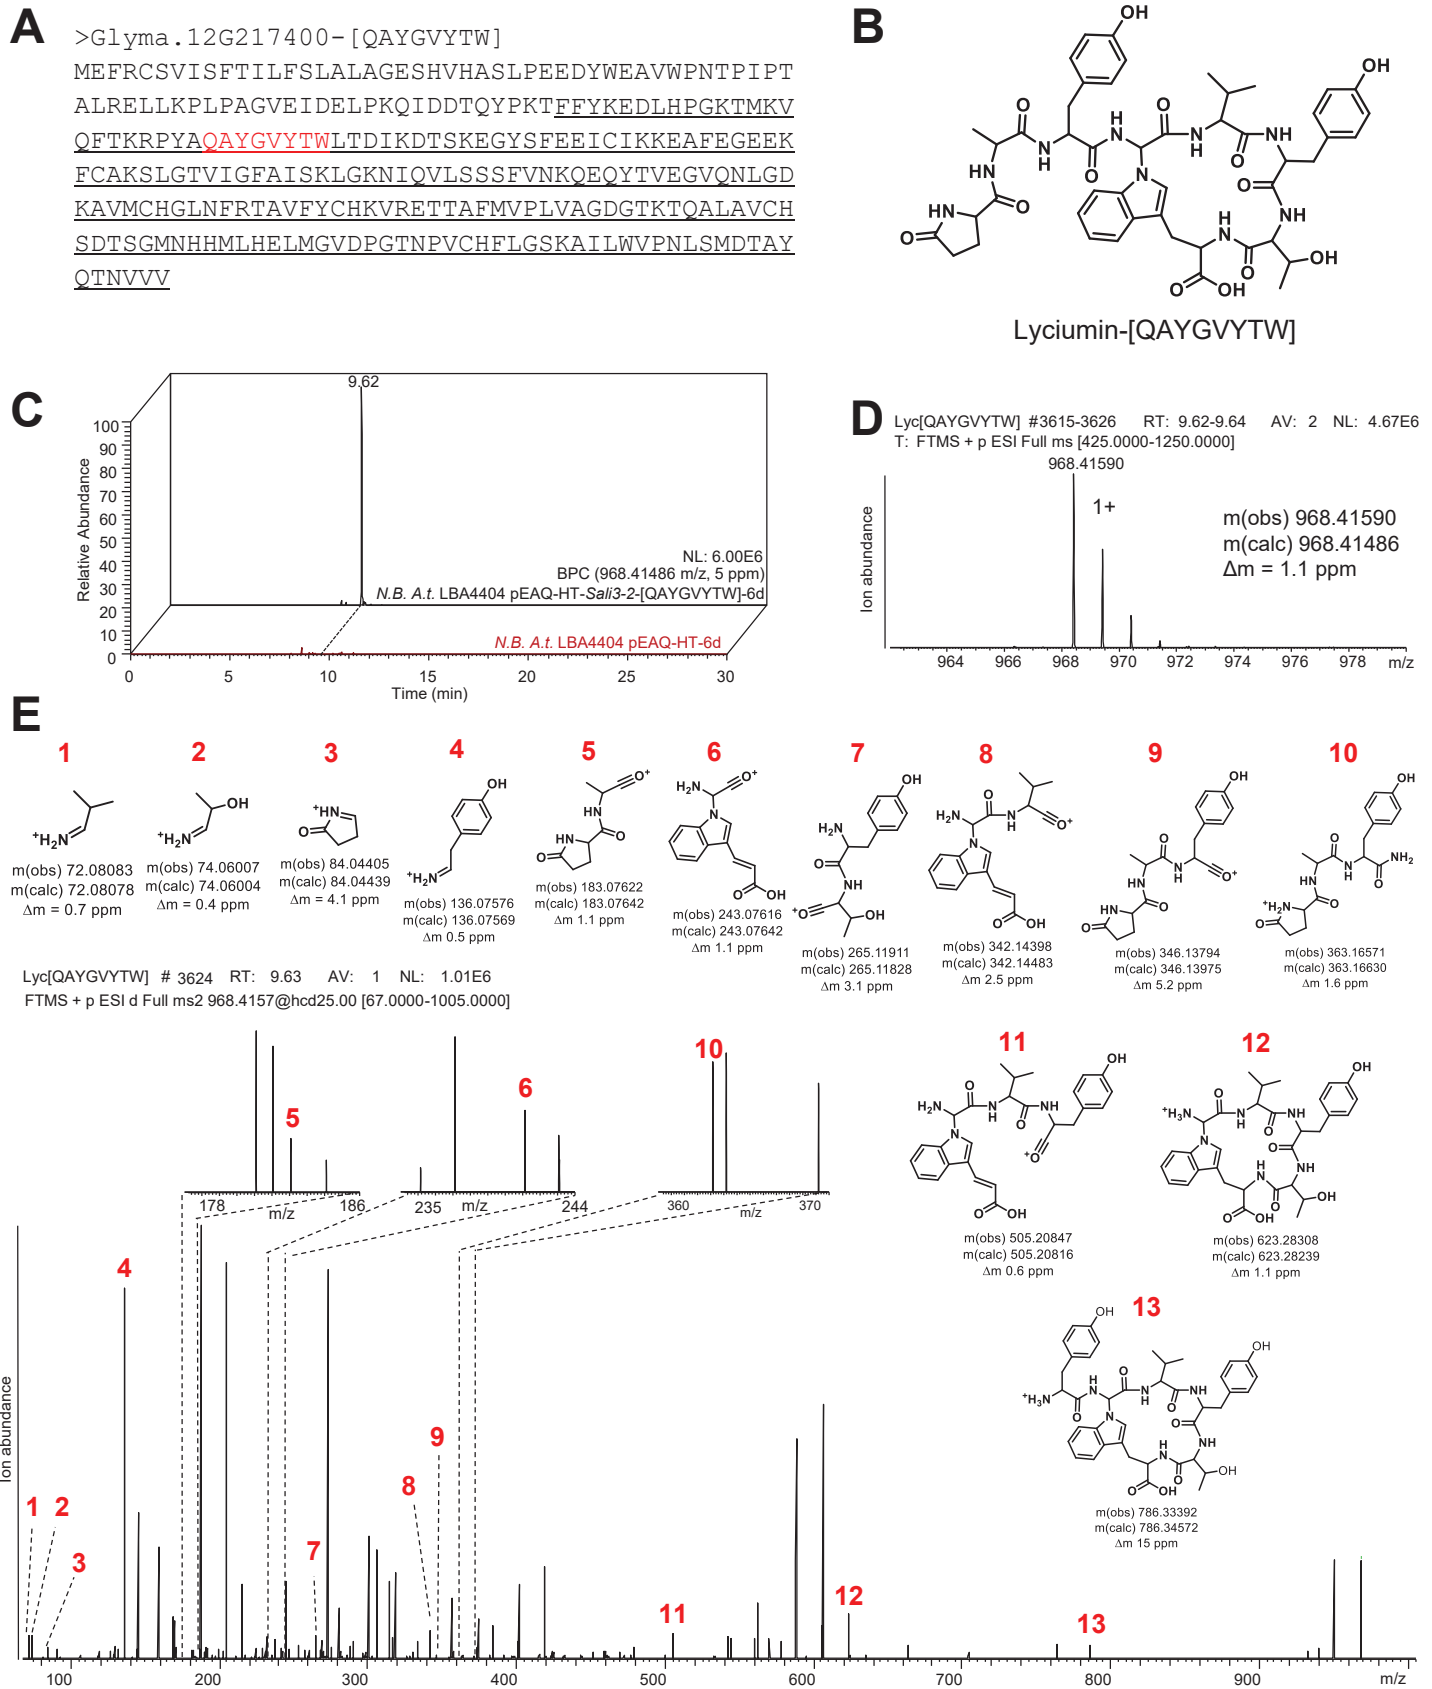

**Figure S32 | Heterologous expression of *Sali3-2*-[QAYGVYTW] in *Nicotiana benthamiana*.** (A) *Sali3-2*-[QAYGVYTW] lyciumin precursor peptide (BURP domain underlined, core peptide highlighted in red). (B) Predicted [QAYGVYTW]-lyciumin chemotype. (C) LC-MS chemotyping of predicted [QAYGVYTW]-lyciumin in peptide extract of *N. benthamiana* leaves infiltrated with *A. tumefaciens* LBA4404 pEAQ-HT-*Sali3-2*-[QAYGVYTW] for six days. (D) MS analysis of predicted [QAYGVYTW]-lyciumin chemotype. (E) MS/MS analysis of predicted [QAYGVYTW]-lyciumin chemotype.

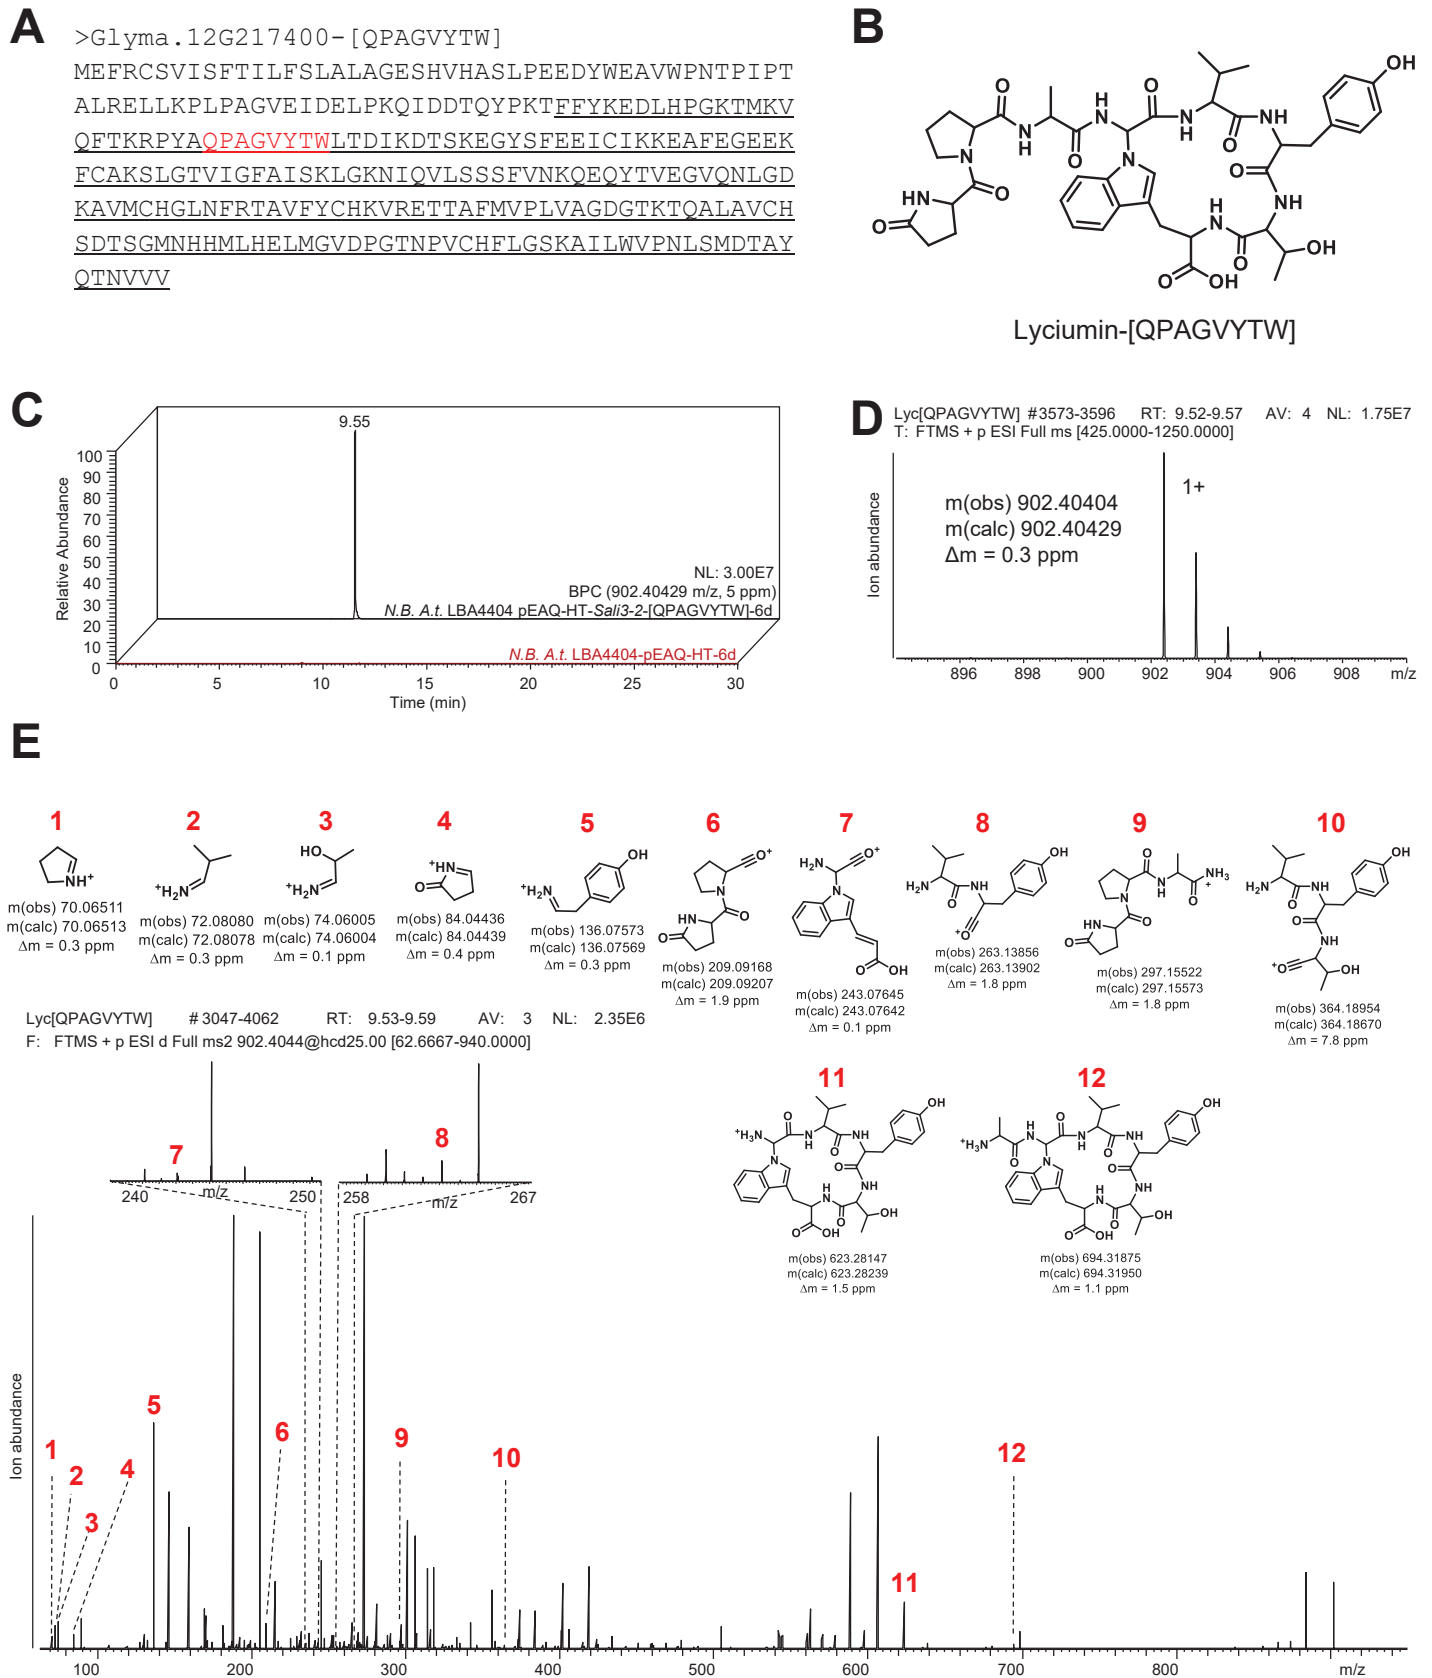

**Figure S33 | Heterologous expression of *Sali3-2*-[QPAGVYTW] in *Nicotiana benthamiana*. (A) *Sali3-2*-[QPAGVYTW] lyciumin precursor peptide (BURP domain underlined, core peptide highlighted in red). (B) Predicted [QPAGVYTW]-lyciumin chemotype. (C) LC-MS chemotyping of predicted [QPAGVYTW]-lyciumin in peptide extract of *N. benthamiana* leaves infiltrated with *A. tumefaciens* LBA4404 pEAQ-HT-*Sali3-2*-[QPAGVYTW] for six days. (D) MS analysis of predicted [QPAGVYTW]-lyciumin chemotype. (E) MS/MS analysis of predicted [QPAGVYTW]-lyciumin chemotype.**



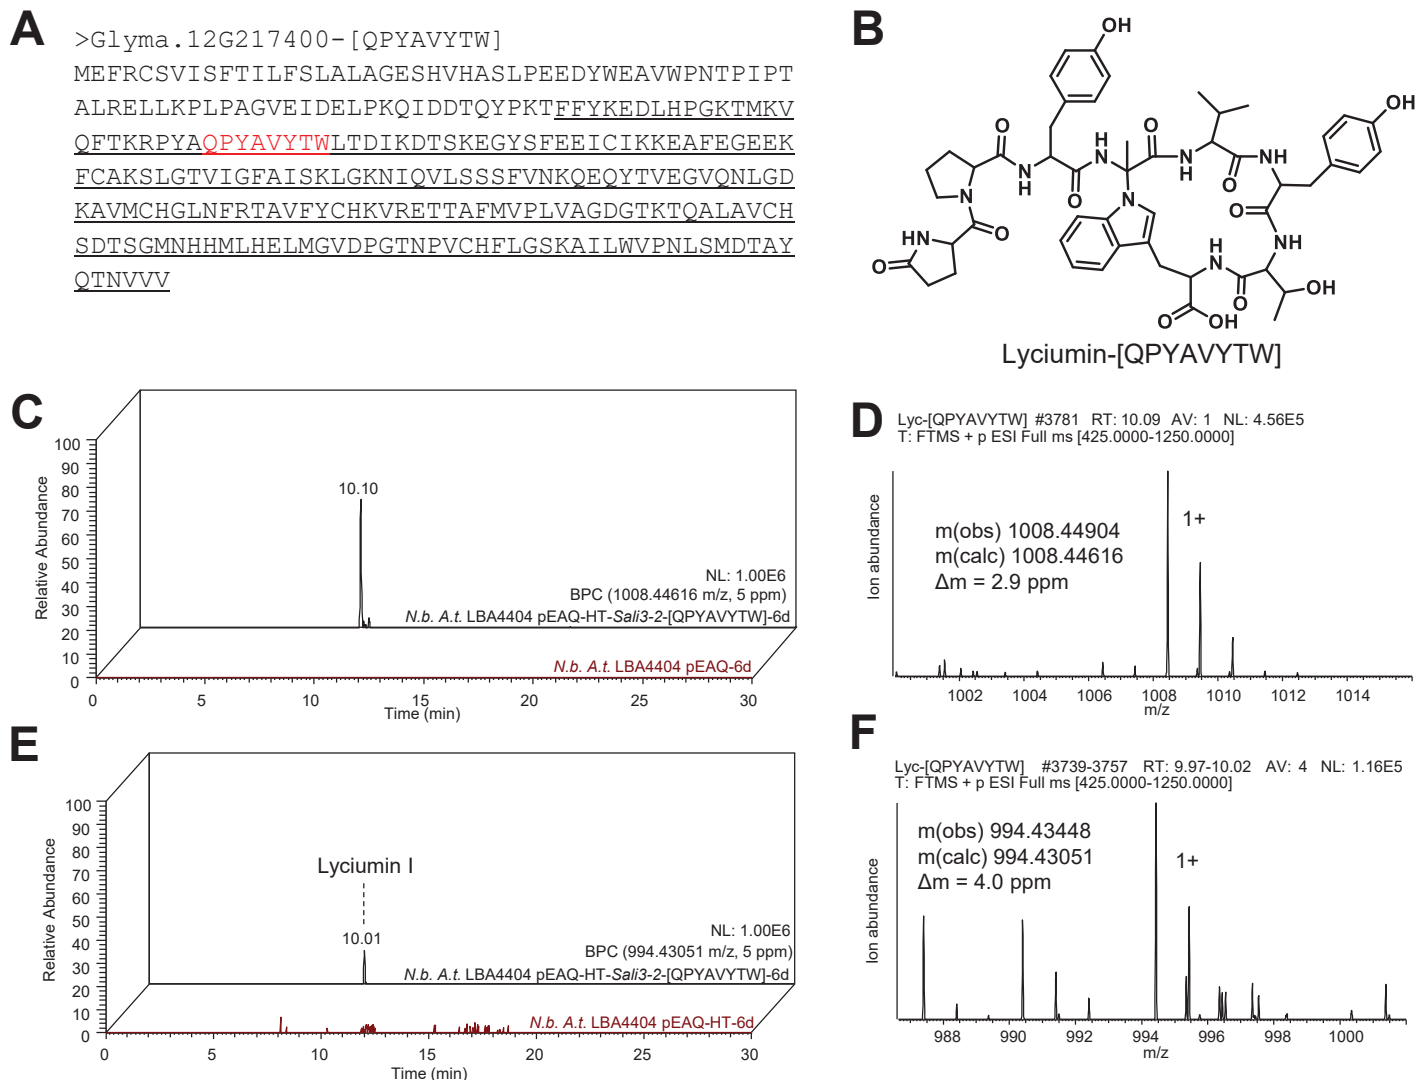

**Figure S34 | Heterologous expression of *Sali3-2*-[QPYAVYTW] in *Nicotiana benthamiana*.** (A) *Sali3-2*-[QPYAVYTW] lyciumin precursor peptide (BURP domain underlined, core peptide highlighted in red). (B) Predicted [QPYAVYTW]-lyciumin chemotype. (C) LC-MS chemotyping of predicted [QPYAVYTW]-lyciumin in peptide extract of *N. benthamiana* leaves infiltrated with *A. tumefaciens* LBA4404 pEAQ-HT-*Sali3-2*-[QPYAVYTW] for six days. (D) MS analysis of predicted [QPYAVYTW]-lyciumin chemotype. (E) LC-MS chemotyping of lyciumin I in peptide extract of *N. benthamiana* leaves infiltrated with *A. tumefaciens* LBA4404 pEAQ-HT-*Sali3-2*-[QPYAVYTW] for six days. (F) MS analysis of predicted lyciumin I chemotype.

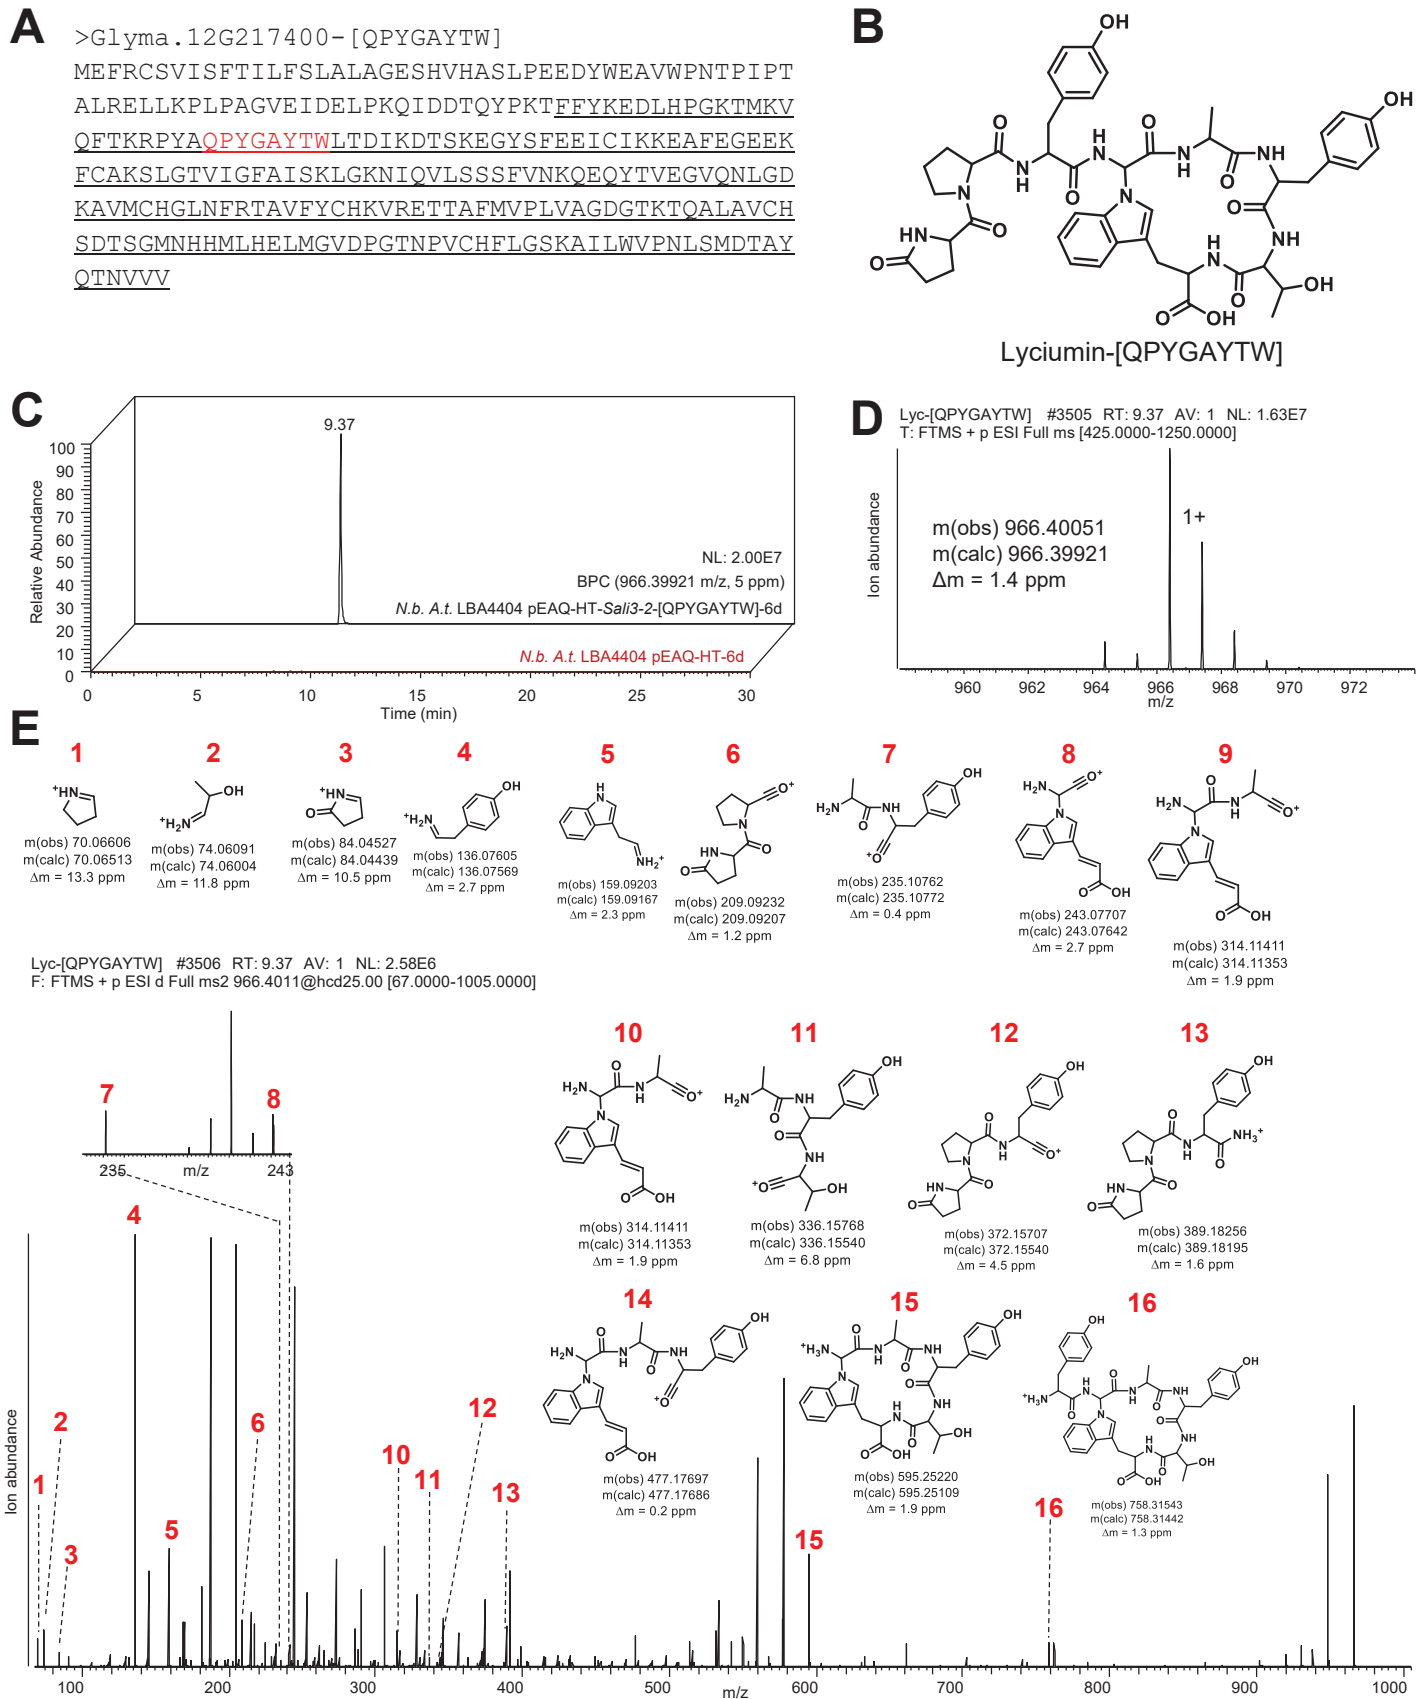

**Figure S35 | Heterologous expression of *Sali3-2*-[QPYGAYTW] in *Nicotiana benthamiana*.** (A) *Sali3-2*-[QPYGAYTW] lyciumin precursor peptide (BURP domain underlined, core peptide highlighted in red). (B) Predicted [QPYGAYTW]-lyciumin chemotype. (C) LC-MS chemotyping of predicted [QPYGAYTW]-lyciumin in peptide extract of *N. benthamiana* leaves infiltrated with *A. tumefaciens* LBA4404 pEAQ-HT-*Sali3-2*-[QPYGAYTW] for six days. (D) MS analysis of predicted [QPYGAYTW]-lyciumin chemotype. (E) MS/MS analysis of predicted [QPYGAYTW]-lyciumin chemotype.

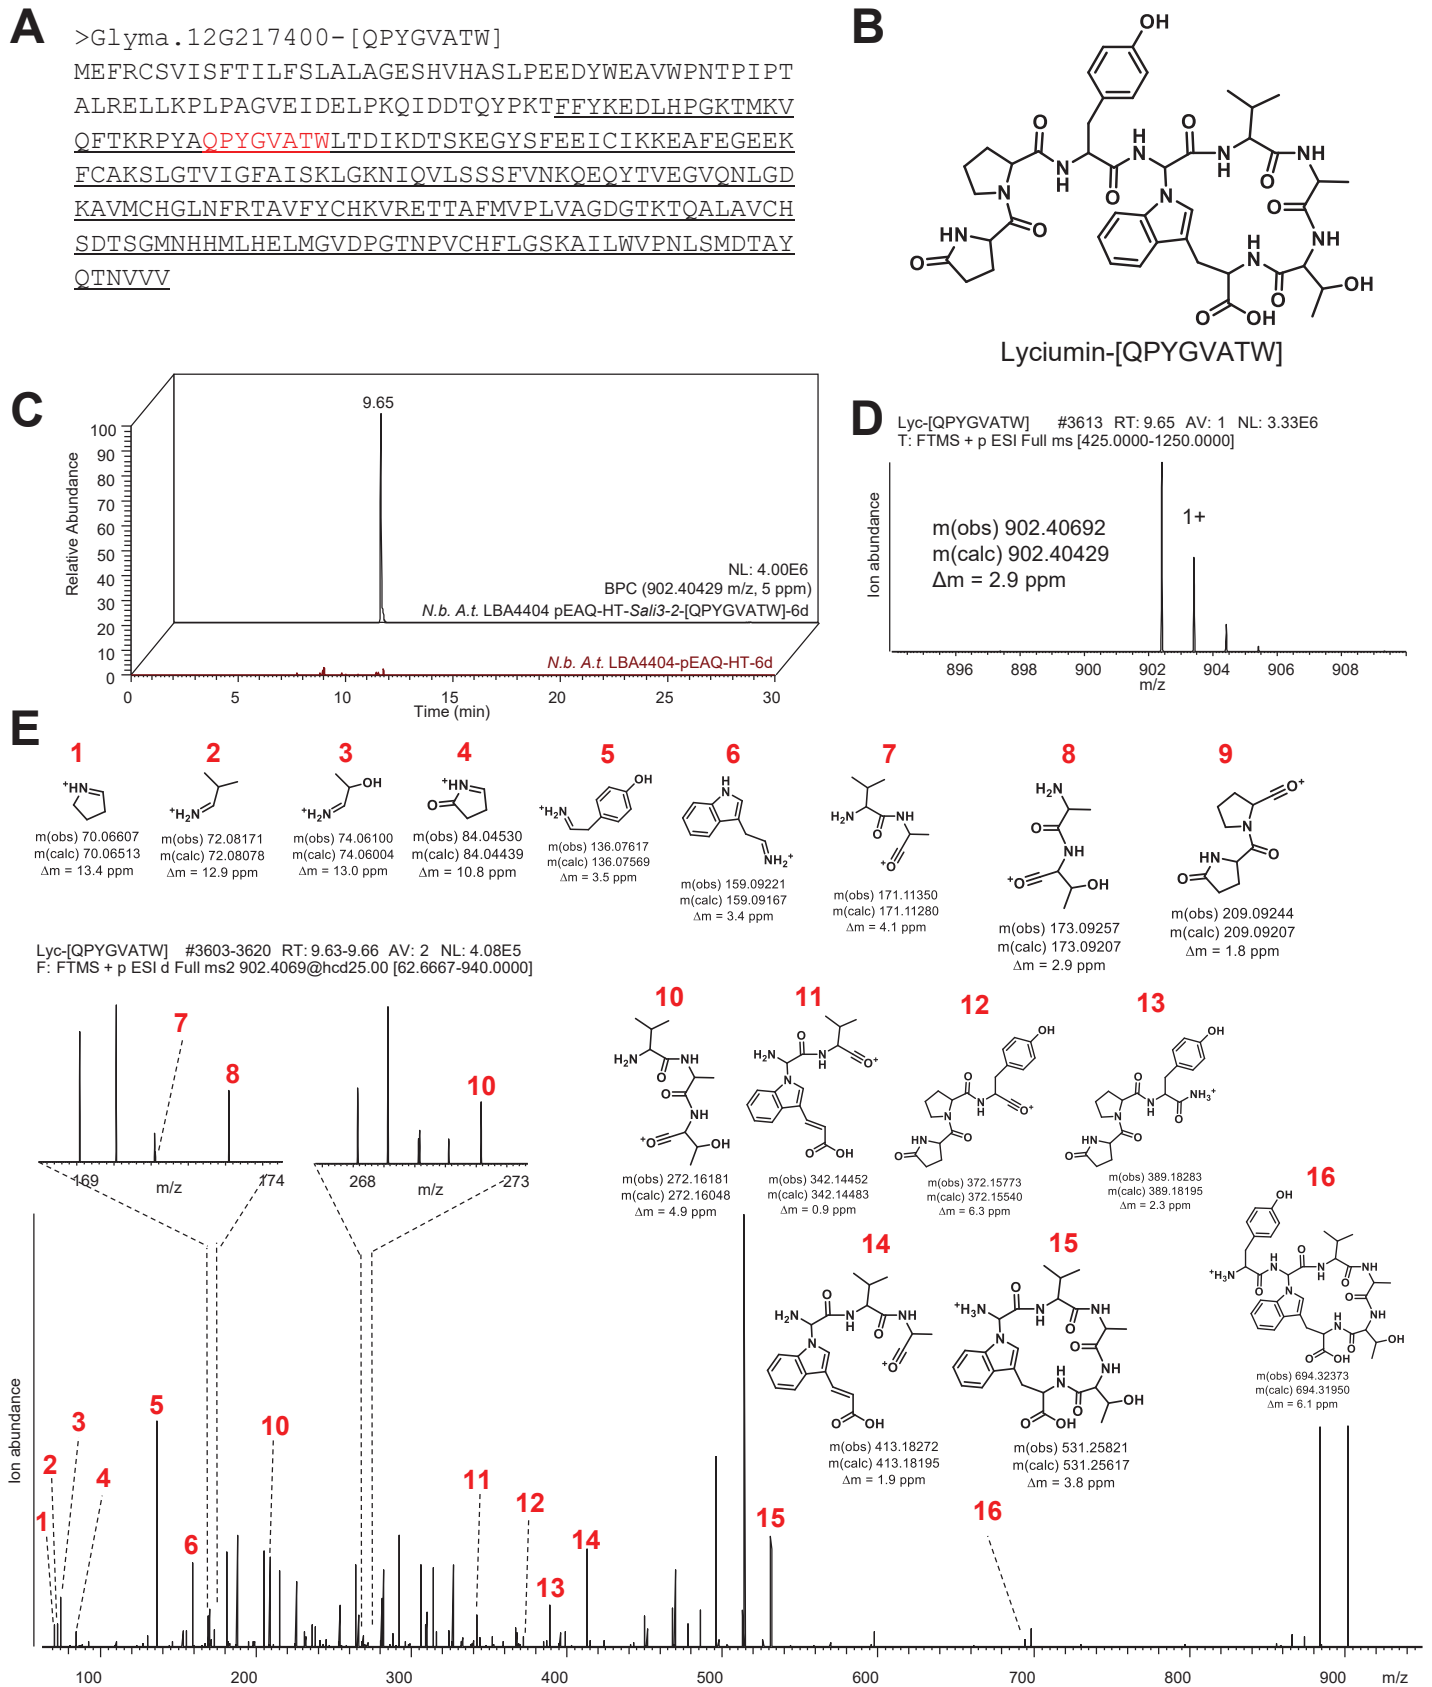

**Figure S36 | Heterologous expression of *Sali3-2*-[QPYGVATW] in *Nicotiana benthamiana*. (A) *Sali3-2*-[QPYGVATW] lyciumin precursor peptide (BURP domain underlined, core peptide highlighted in red). (B) Predicted [QPYGVATW]-lyciumin chemotype. (C) LC-MS chemotyping of predicted [QPYGVATW]-lyciumin in peptide extract of *N. benthamiana* leaves infiltrated with *A. tumefaciens* LBA4404 pEAQ-HT-*Sali3-2*-[QPYGVATW] for six days. (D) MS analysis of predicted [QPYGVATW]-lyciumin chemotype. (E) MS/MS analysis of predicted [QPYGVATW]-lyciumin chemotype.**

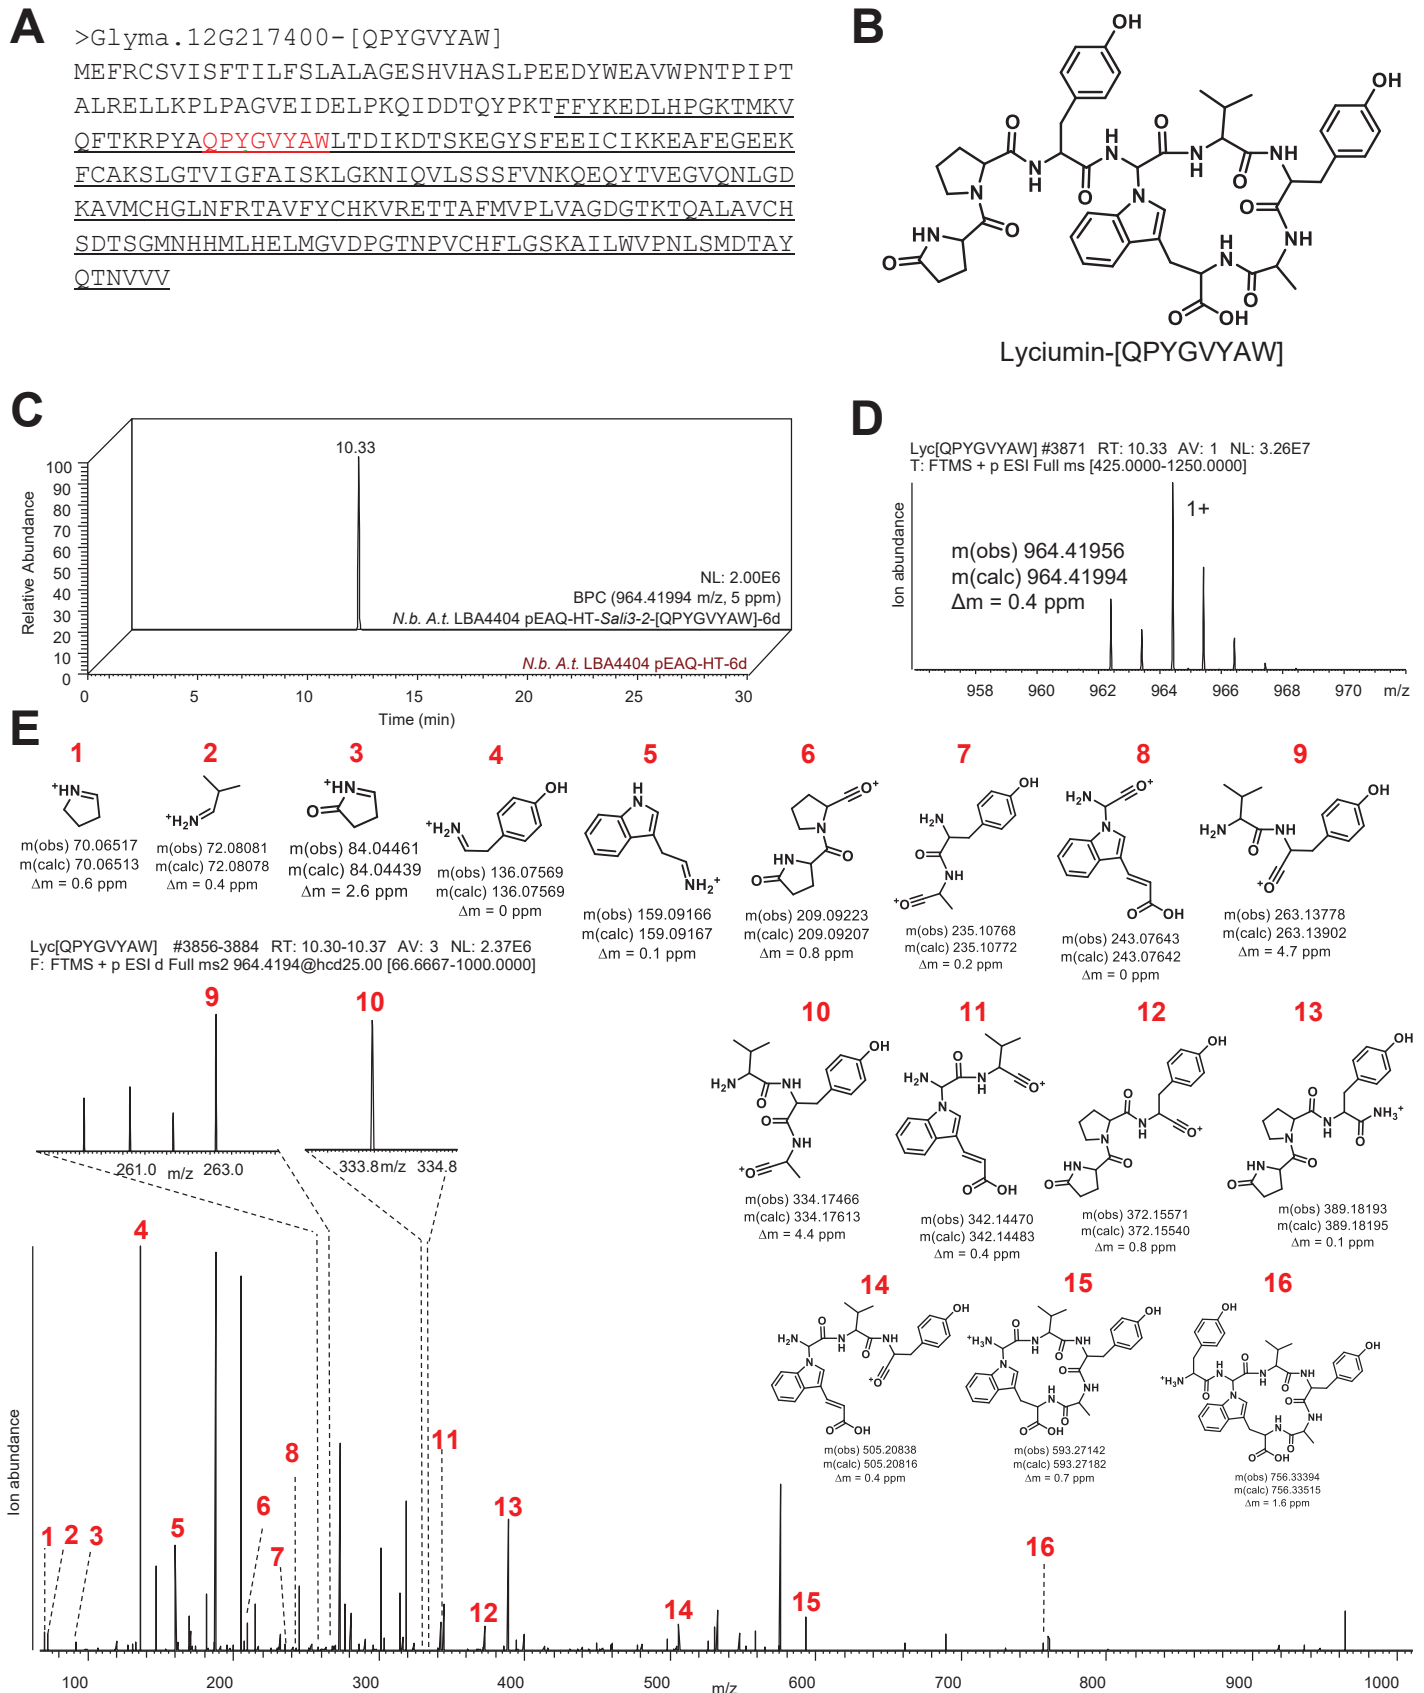

**Figure S37 | Heterologous expression of *Sali3-2*-[QPYG<sup>V</sup>VYAW] in *Nicotiana benthamiana*. (A) *Sali3-2*-[QPYG<sup>V</sup>VYAW] lyciumin precursor peptide (BURP domain underlined, core peptide highlighted in red). (B) Predicted [QPYG<sup>V</sup>VYAW]-lyciumin chemotype. (C) LC-MS chemotyping of predicted [QPYG<sup>V</sup>VYAW]-lyciumin in peptide extract of *N. benthamiana* leaves infiltrated with *A. tumefaciens* LBA4404 pEAQ-HT-*Sali3-2*-[QPYG<sup>V</sup>VYAW] for six days. (D) MS analysis of predicted [QPYG<sup>V</sup>VYAW]-lyciumin chemotype. (E) MS/MS analysis of predicted [QPYG<sup>V</sup>VYAW]-lyciumin chemotype.**

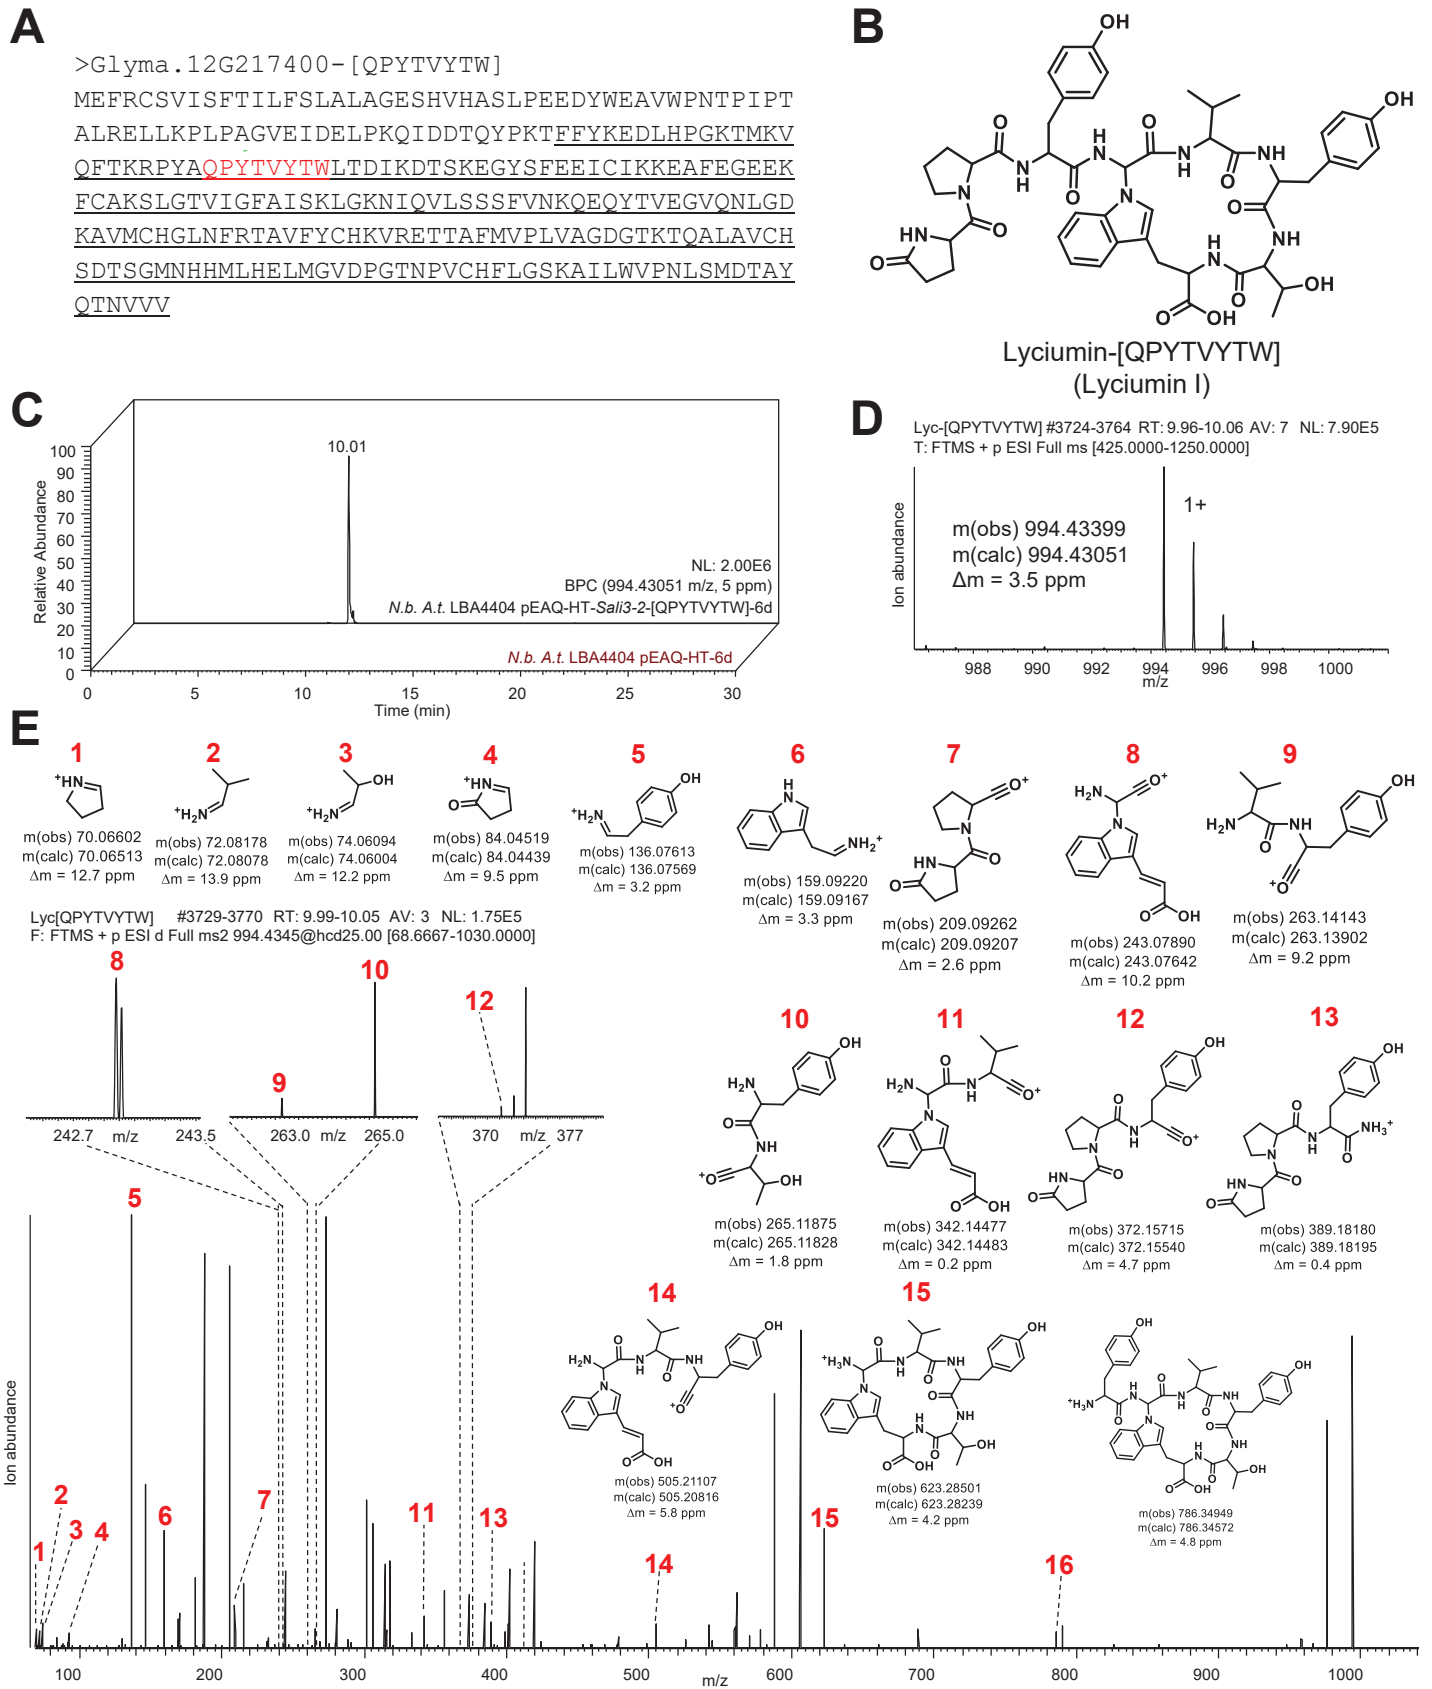

**Figure S38 | Heterologous expression of *Sali3-2*-[QPYTVYTW] in *Nicotiana benthamiana*. (A) *Sali3-2*-[QPYTVYTW] lyciumin precursor peptide (BURP domain underlined, core peptide highlighted in red). (B) Predicted [QPYTVYTW]-lyciumin chemotype. (C) LC-MS chemotyping of predicted [QPYTVYTW]-lyciumin in peptide extract of *N. benthamiana* leaves infiltrated with *A. tumefaciens* LBA4404 pEAQ-HT-*Sali3-2*-[QPYTVYTW] for six days. (D) MS analysis of predicted [QPYTVYTW]-lyciumin chemotype. (E) MS/MS analysis of predicted [QPYTVYTW]-lyciumin chemotype.**

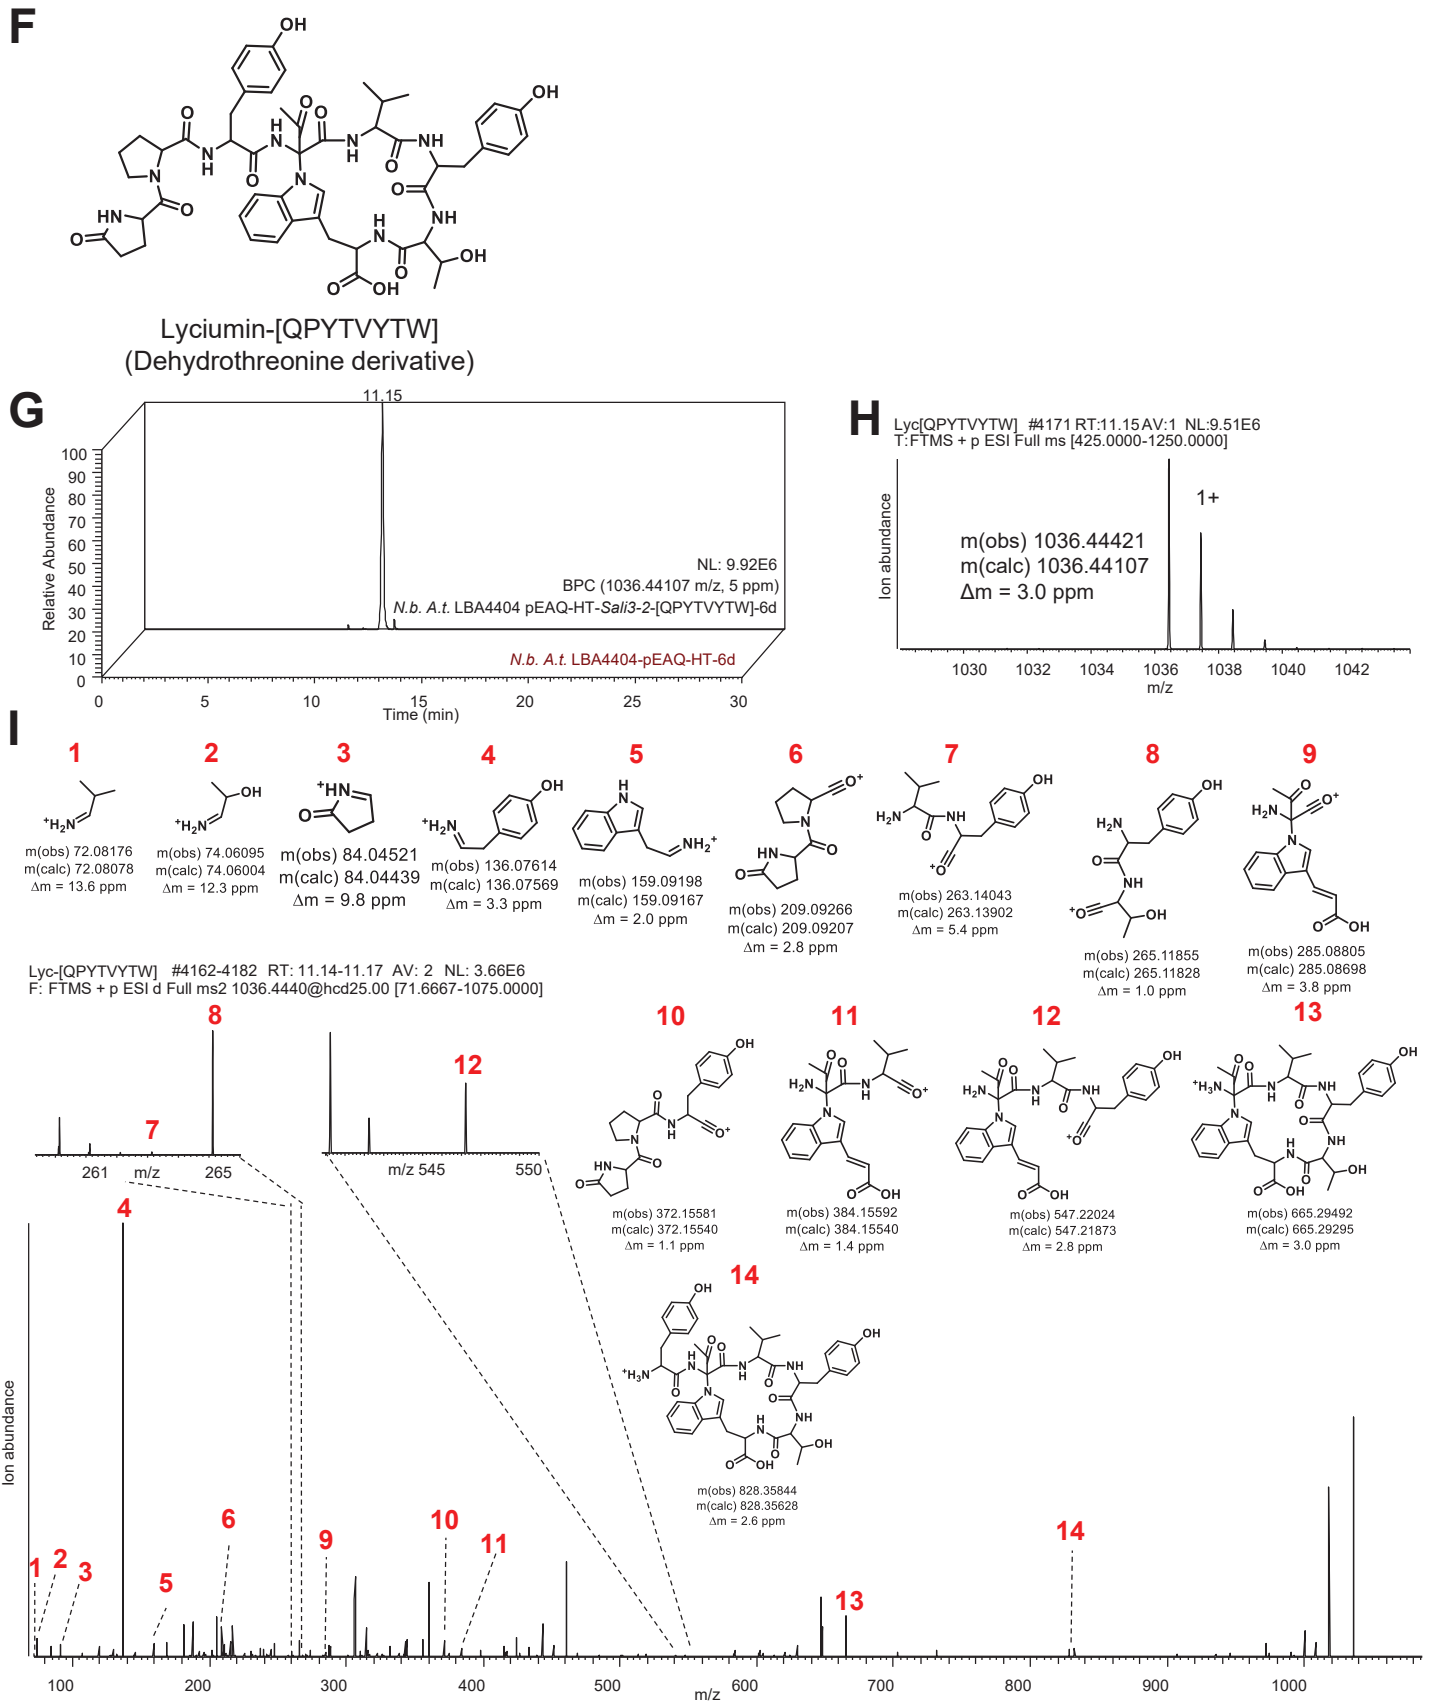

**Figure S38 | Heterologous expression of *Sali*3-2-[QPYTVYTW] in *Nicotiana benthamiana*.** (F) Predicted [QPYTVYTW]-dehydrothreonine lyciumin chemotype. (G) LC-MS chemotyping of predicted [QPYTVYTW]-dehydrothreonine lyciumin in peptide extract of *N. benthamiana* leaves infiltrated with *A. tumefaciens* LBA4404 pEAQ-HT-*Sali*3-2-[QPYTVYTW] for six days. (H) MS analysis of predicted [QPYTVYTW]-dehydrothreonine lyciumin chemotype. (I) MS/MS analysis of predicted [QPYTVYTW]-dehydrothreonine lyciumin chemotype.

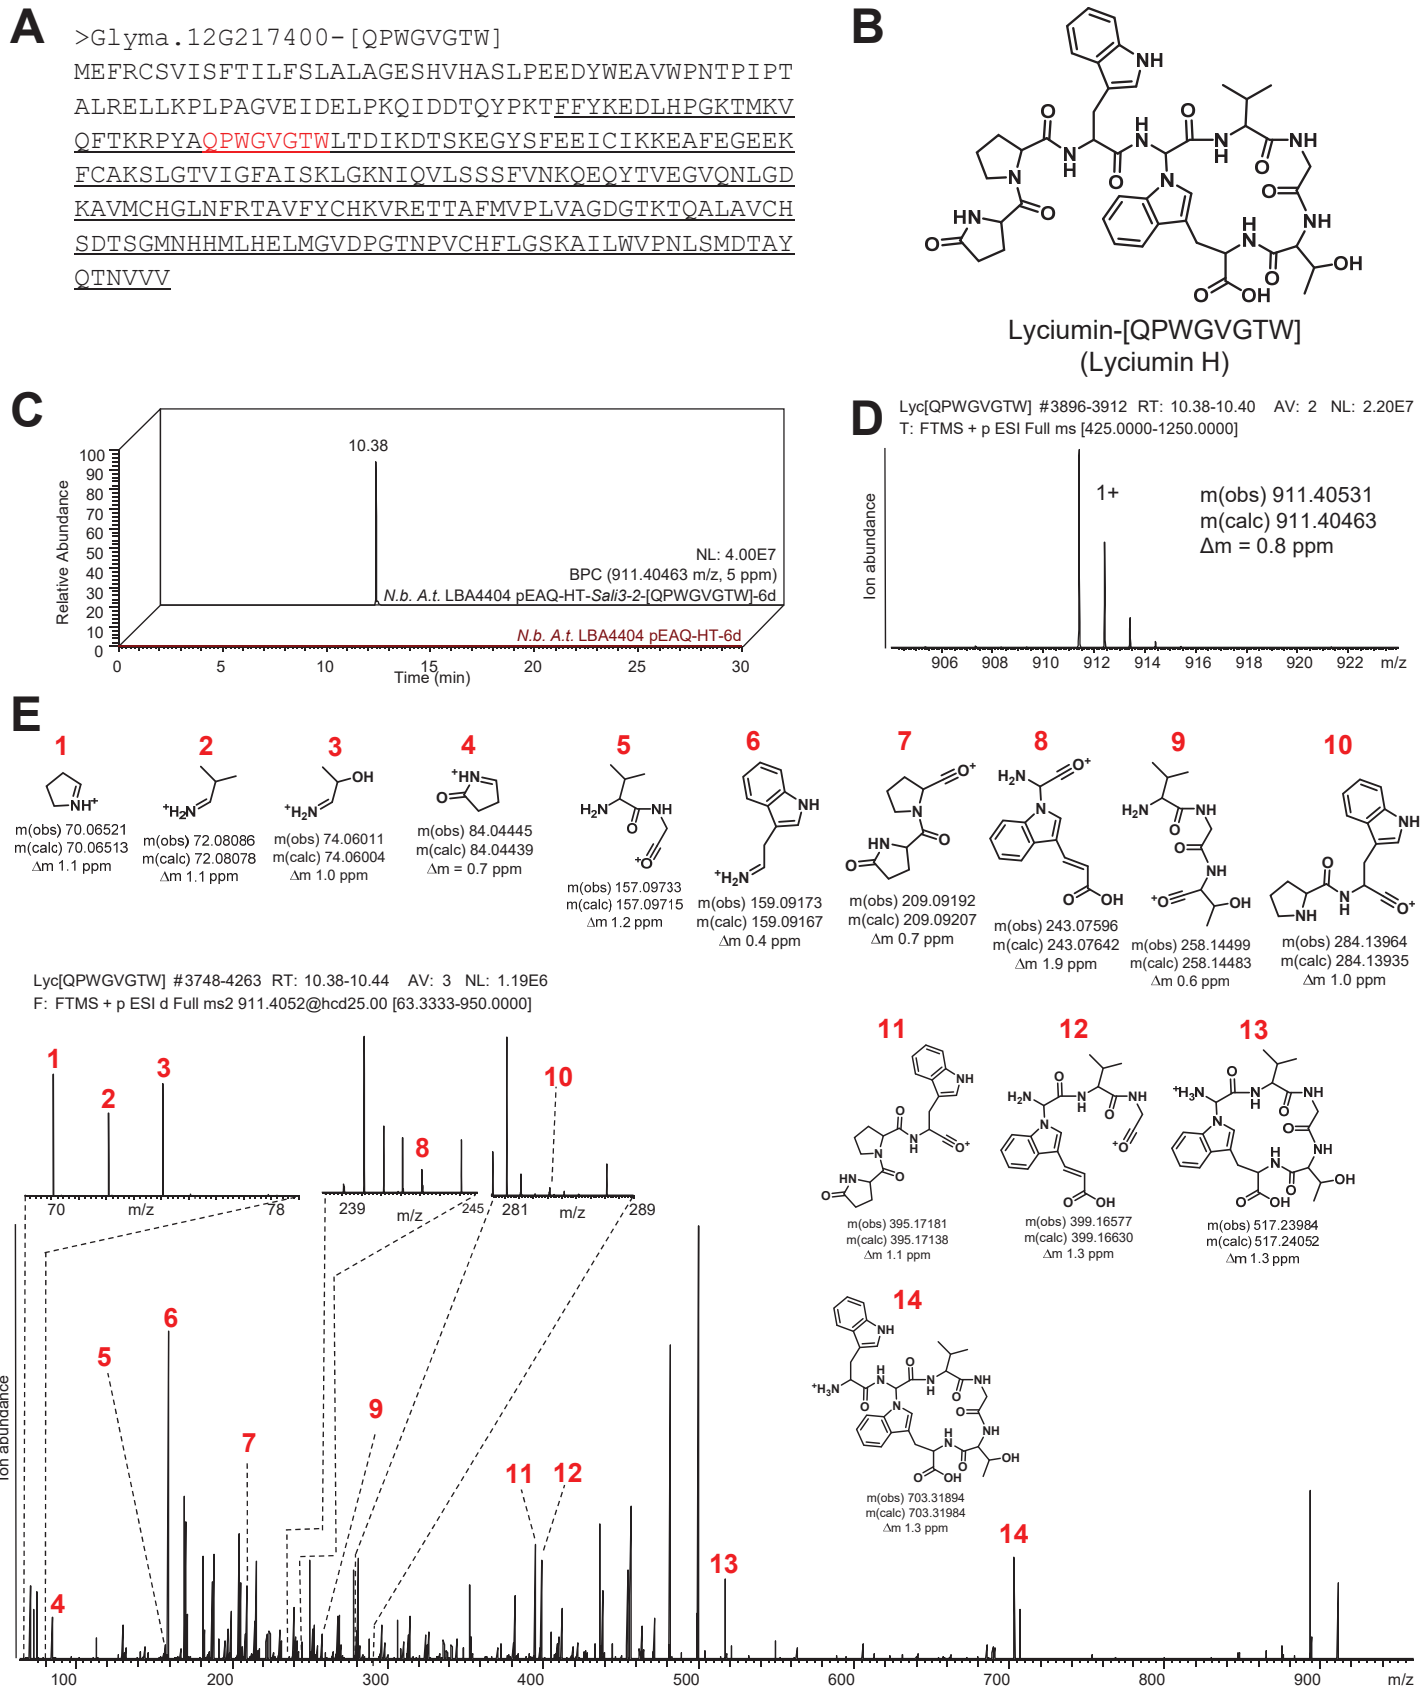

**Figure S39 | Heterologous expression of *Sali3-2*-[QPWGVGTW] in *Nicotiana benthamiana*. (A) *Sali3-2*-[QPWGVGTW] lyciumin precursor peptide (BURP domain underlined, core peptide highlighted in red). (B) Predicted [QPWGVGTW]-lyciumin chemotype. (C) LC-MS chemotyping of predicted [QPWGVGTW]-lyciumin in peptide extract of *N. benthamiana* leaves infiltrated with *A. tumefaciens* LBA4404 pEAQ-HT-*Sali3-2*-[QPWGVGTW] for six days. (D) MS analysis of predicted [QPWGVGTW]-lyciumin chemotype. (E) MS/MS analysis of predicted [QPWGVGTW]-lyciumin chemotype.**

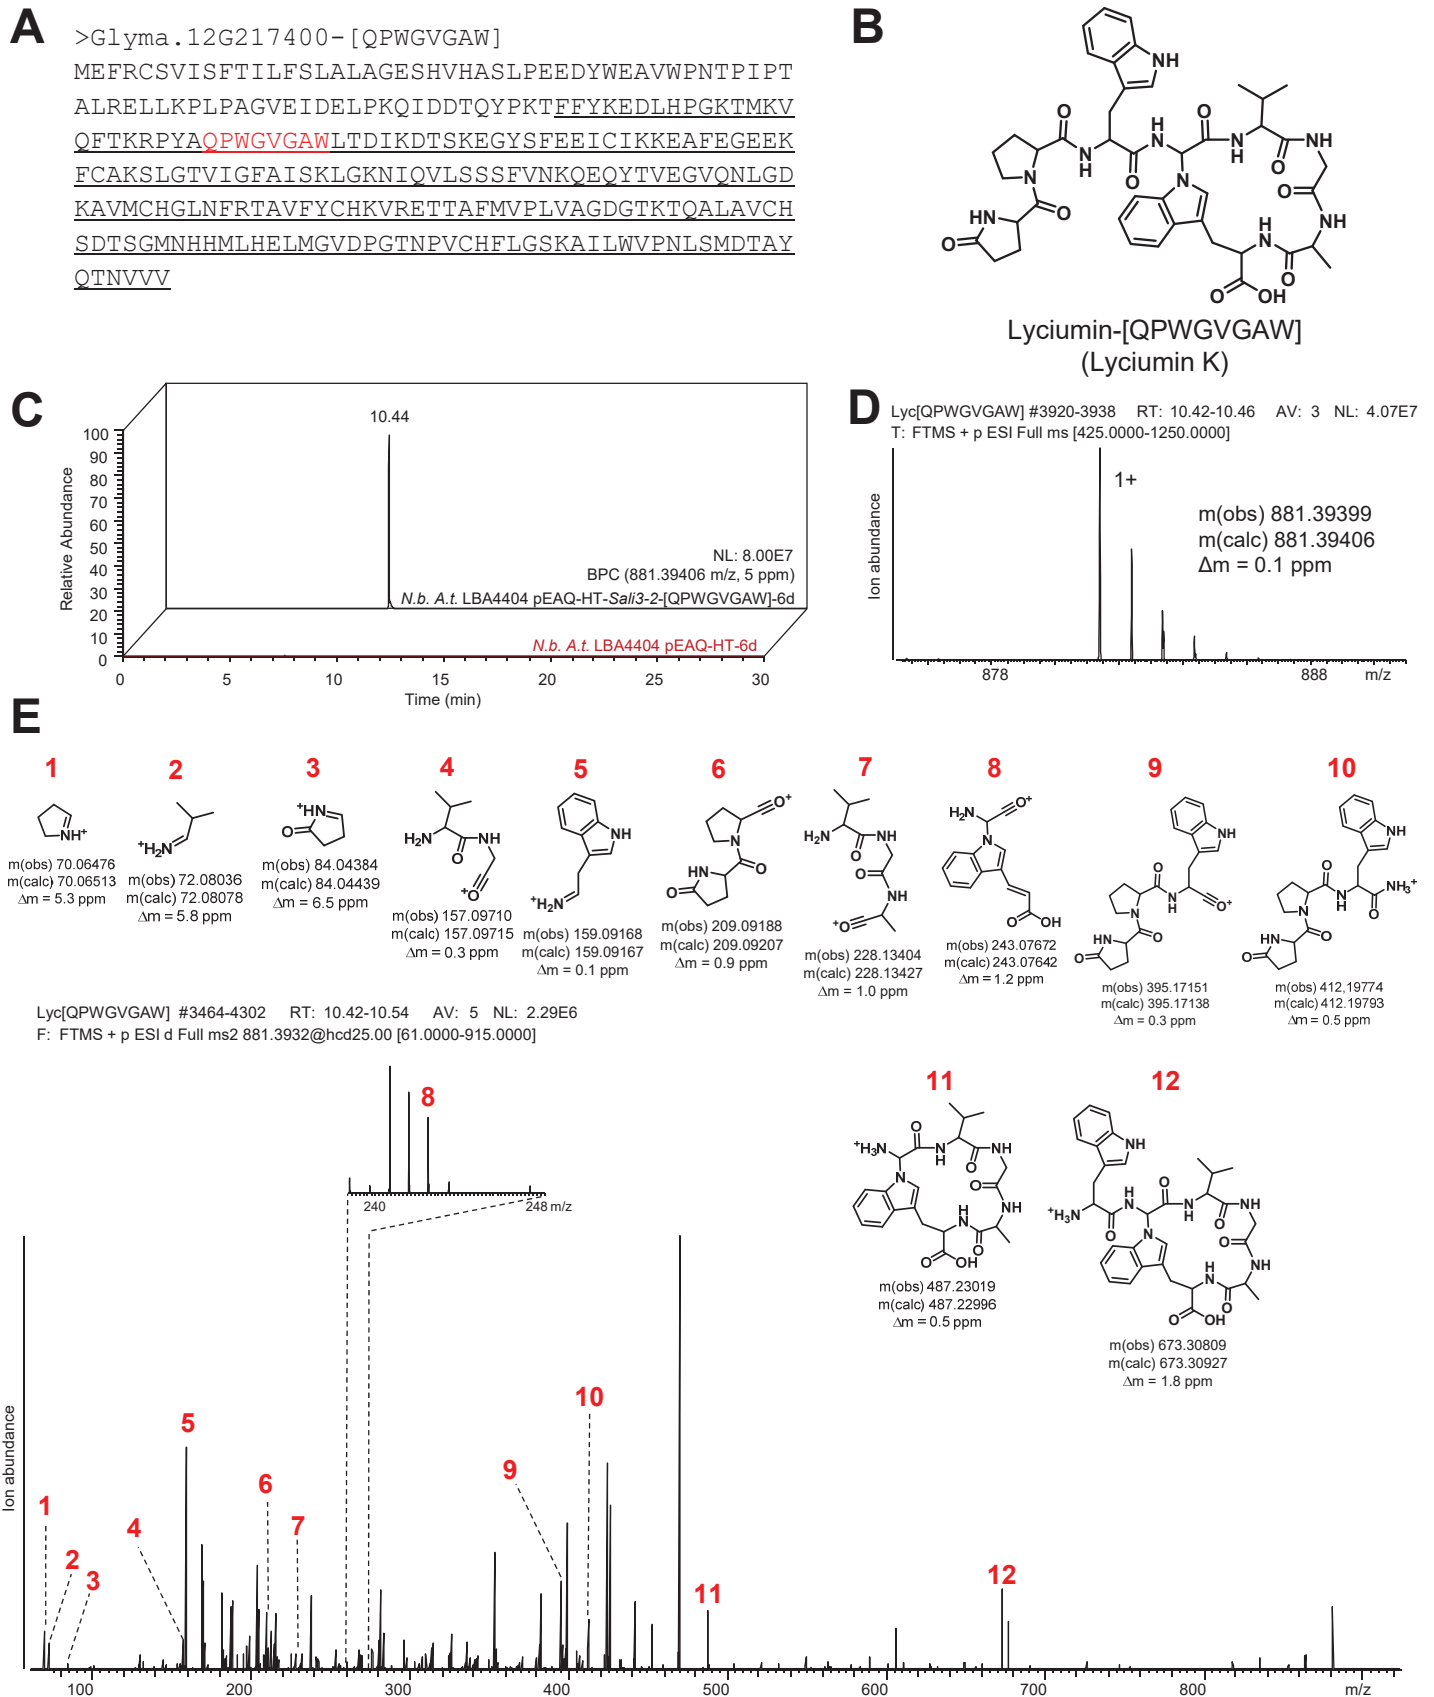

**Figure S40 | Heterologous expression of *Sali3-2*-[QPWVGAW] in *Nicotiana benthamiana*. (A) *Sali3-2*-[QPWVGAW] lyciumin precursor peptide (BURP domain underlined, core peptide highlighted in red). (B) Predicted [QPWVGAW]-lyciumin chemotype. (C) LC-MS chemotyping of predicted [QPWVGAW]-lyciumin in peptide extract of *N. benthamiana* leaves infiltrated with *A. tumefaciens* LBA4404 pEAQ-HT-*Sali3-2*-[QPWVGAW] for six days. (D) MS analysis of predicted [QPWVGAW]-lyciumin chemotype. (E) MS/MS analysis of predicted [QPWVGAW]-lyciumin chemotype.**



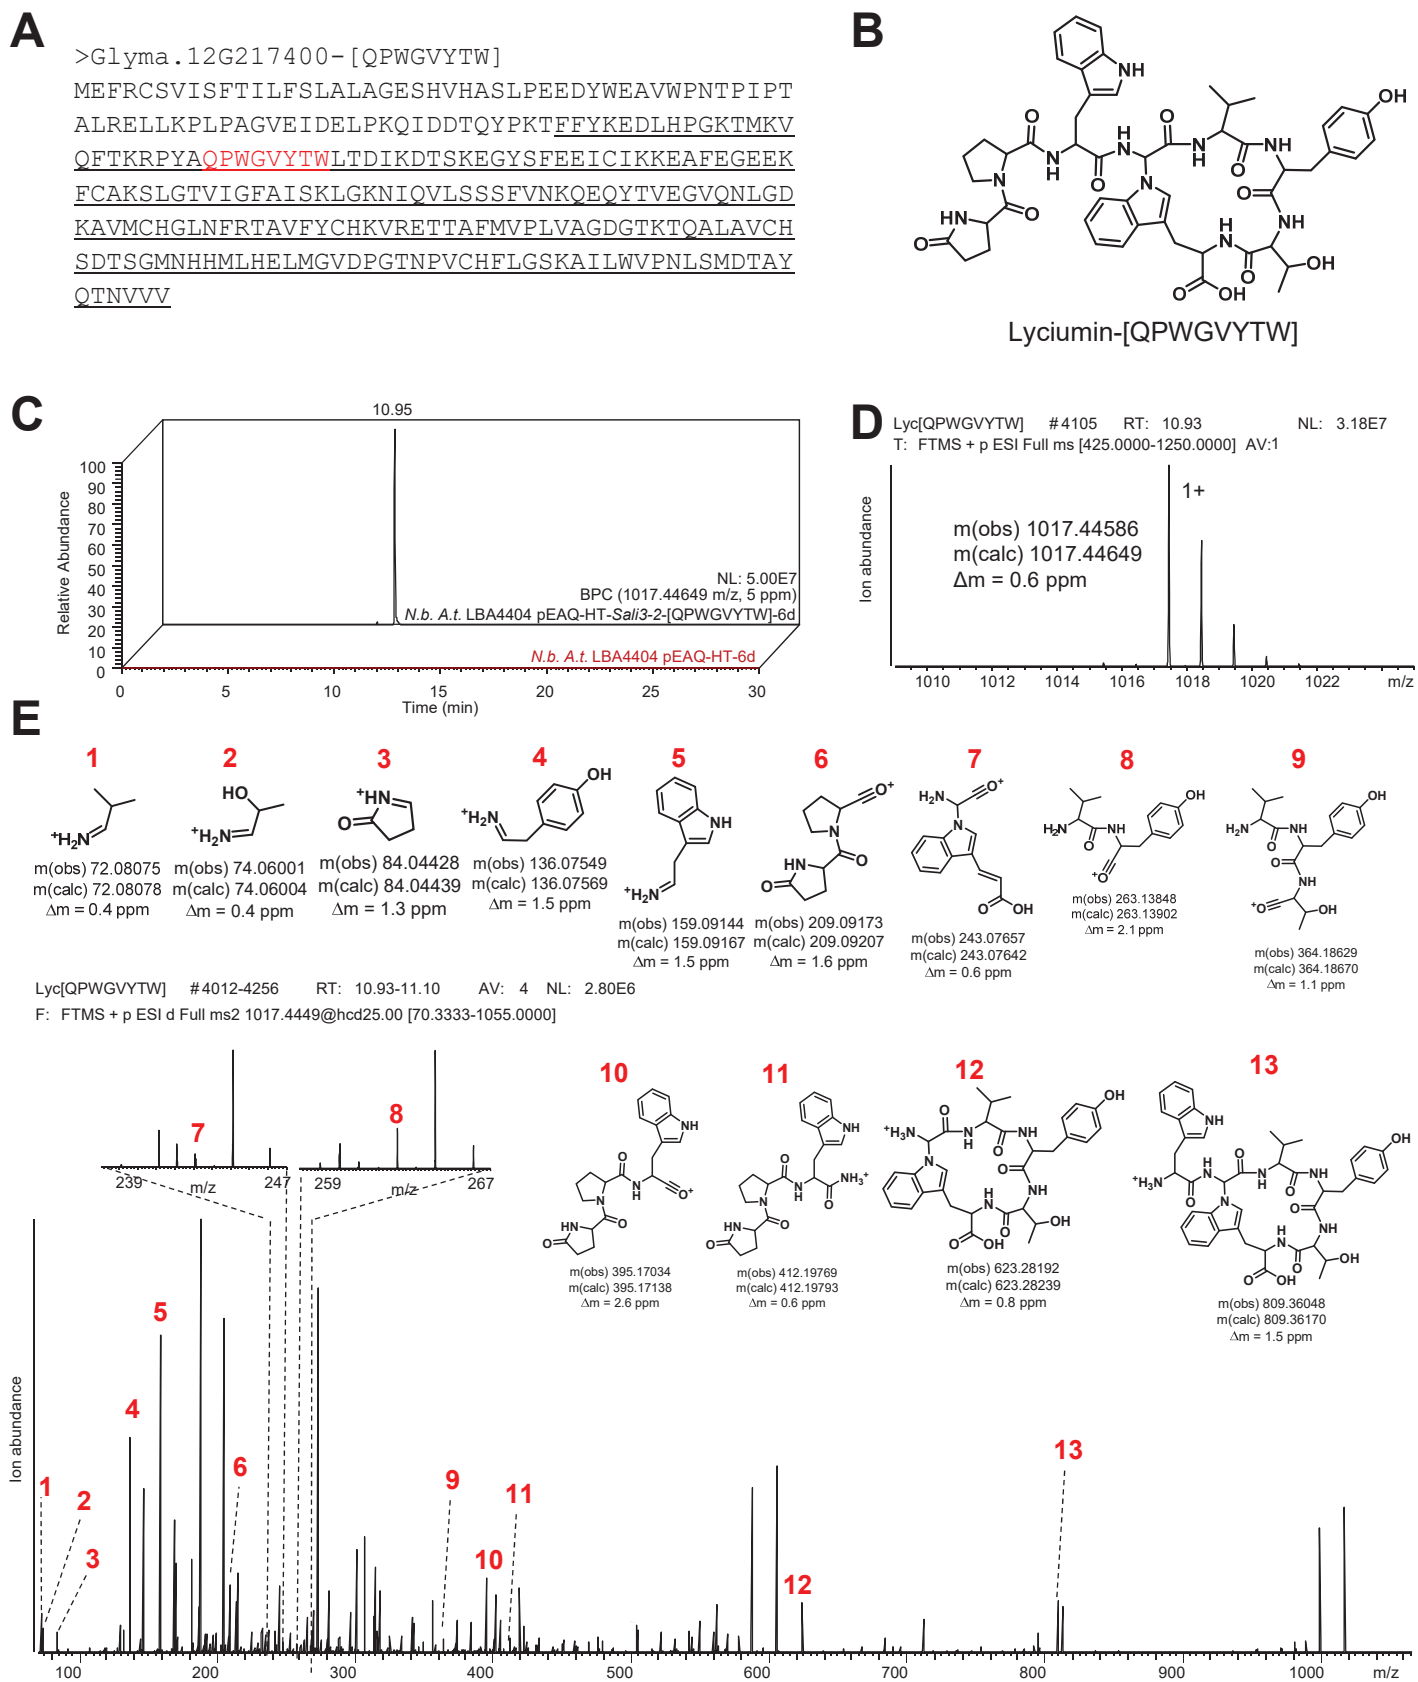

**Figure S41 | Heterologous expression of *Sali3-2*-[QPWGVYTW] in *Nicotiana benthamiana*. (A) *Sali3-2*-[QPWGVYTW] lyciumin precursor peptide (BURP domain underlined, core peptide highlighted in red). (B) Predicted [QPWGVYTW]-lyciumin chemotype. (C) LC-MS chemotyping of predicted [QPWGVYTW]-lyciumin in peptide extract of *N. benthamiana* leaves infiltrated with *A. tumefaciens* LBA4404 pEAQ-HT-*Sali3-2*-[QPWGVYTW] for six days. (D) MS analysis of predicted [QPWGVYTW]-lyciumin chemotype. (E) MS/MS analysis of predicted [QPWGVYTW]-lyciumin chemotype.**

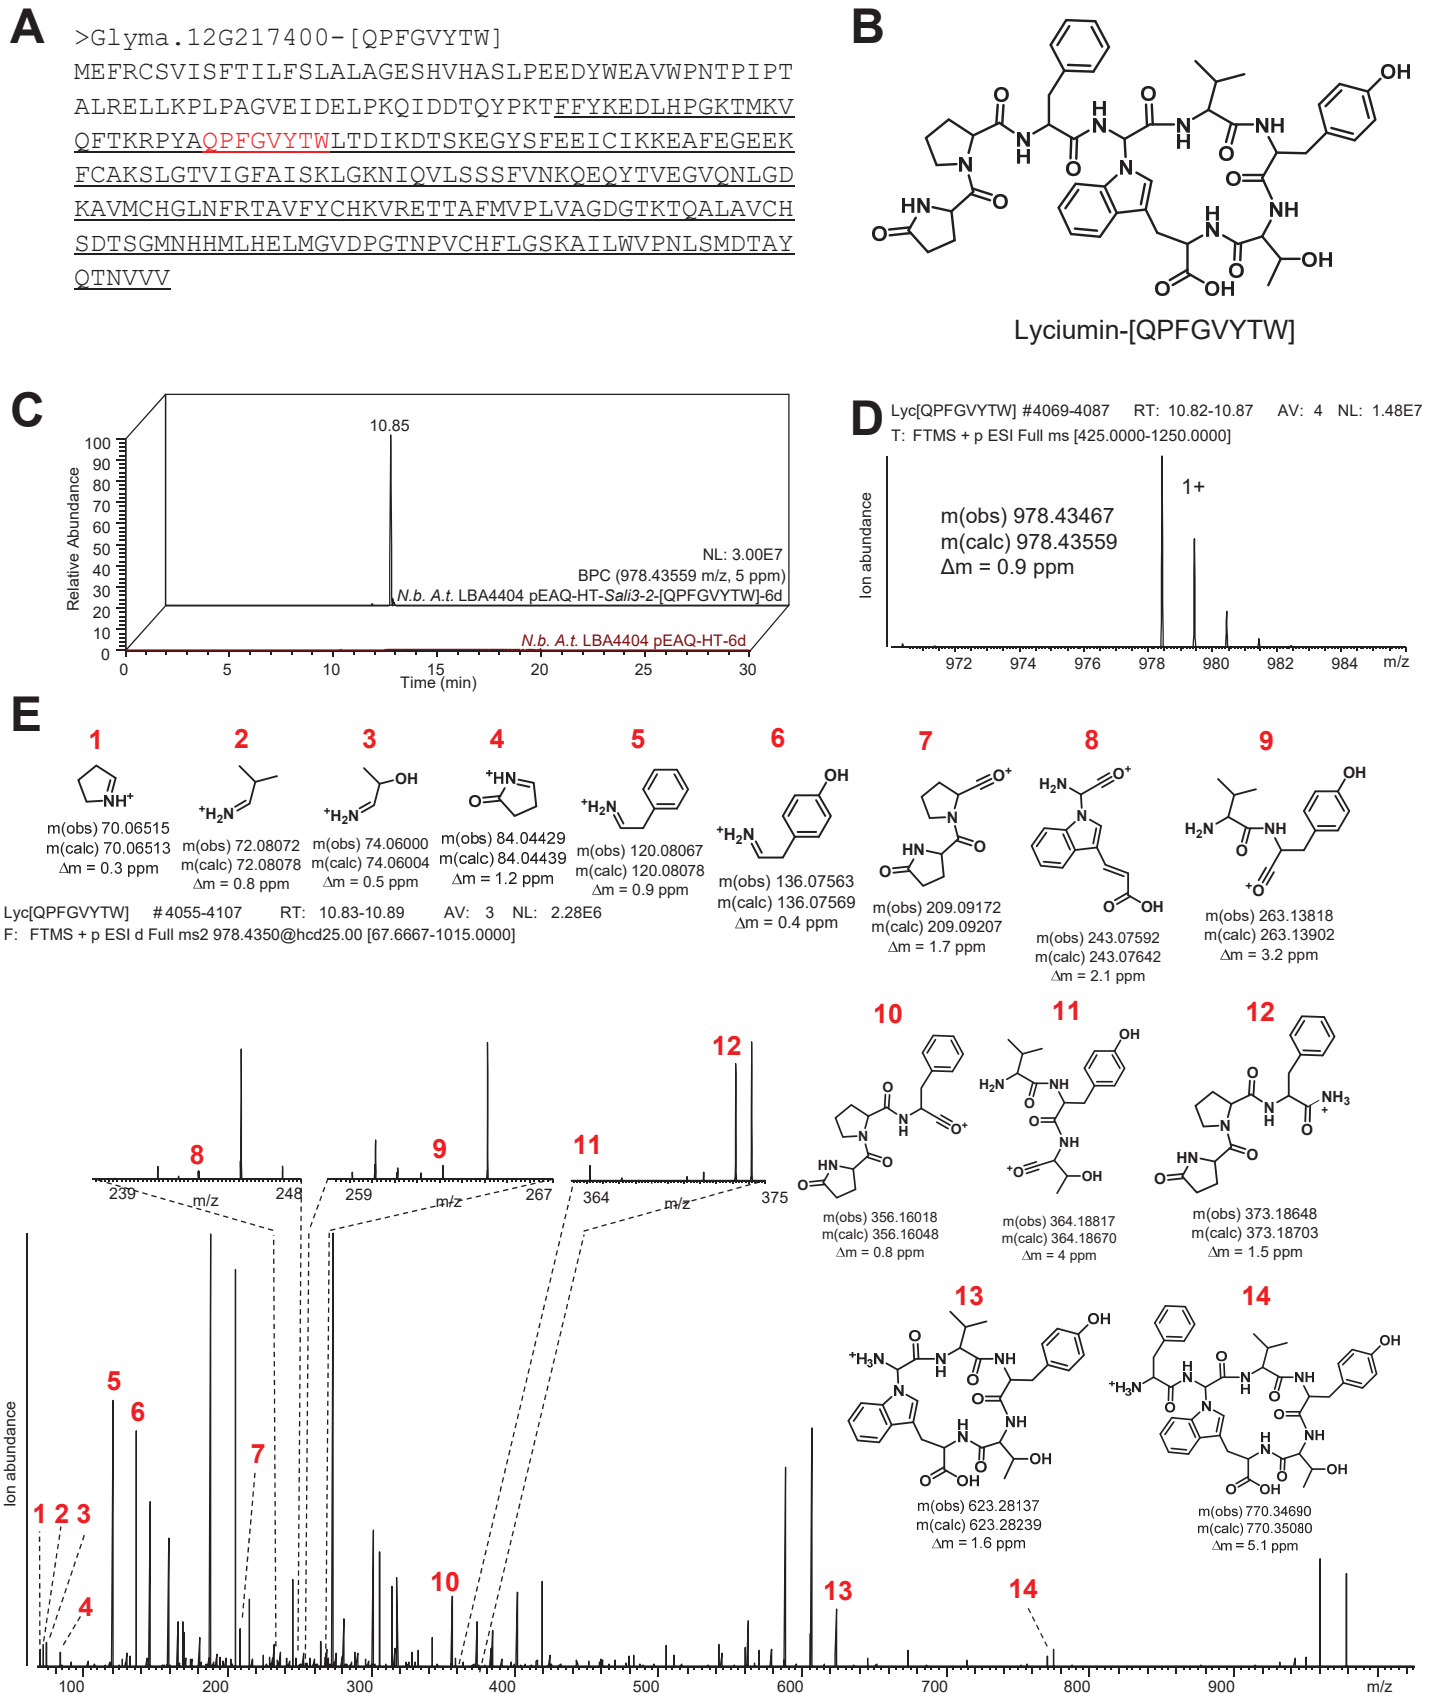

**Figure S42 | Heterologous expression of *Sali3-2*-[QPF $\overline{G}$ VYTW] in *Nicotiana benthamiana*. (A) *Sali3-2*-[QPF $\overline{G}$ VYTW] lyciumin precursor peptide (BURP domain underlined, core peptide highlighted in red). (B) Predicted [QPF $\overline{G}$ VYTW]-lyciumin chemotype. (C) LC-MS chemotyping of predicted [QPF $\overline{G}$ VYTW]-lyciumin in peptide extract of *N. benthamiana* leaves infiltrated with *A. tumefaciens* LBA4404 pEAQ-HT-*Sali3-2*-[QPF $\overline{G}$ VYTW] for six days. (D) MS analysis of predicted [QPF $\overline{G}$ VYTW]-lyciumin chemotype. (E) MS/MS analysis of predicted [QPF $\overline{G}$ VYTW]-lyciumin chemotype.**

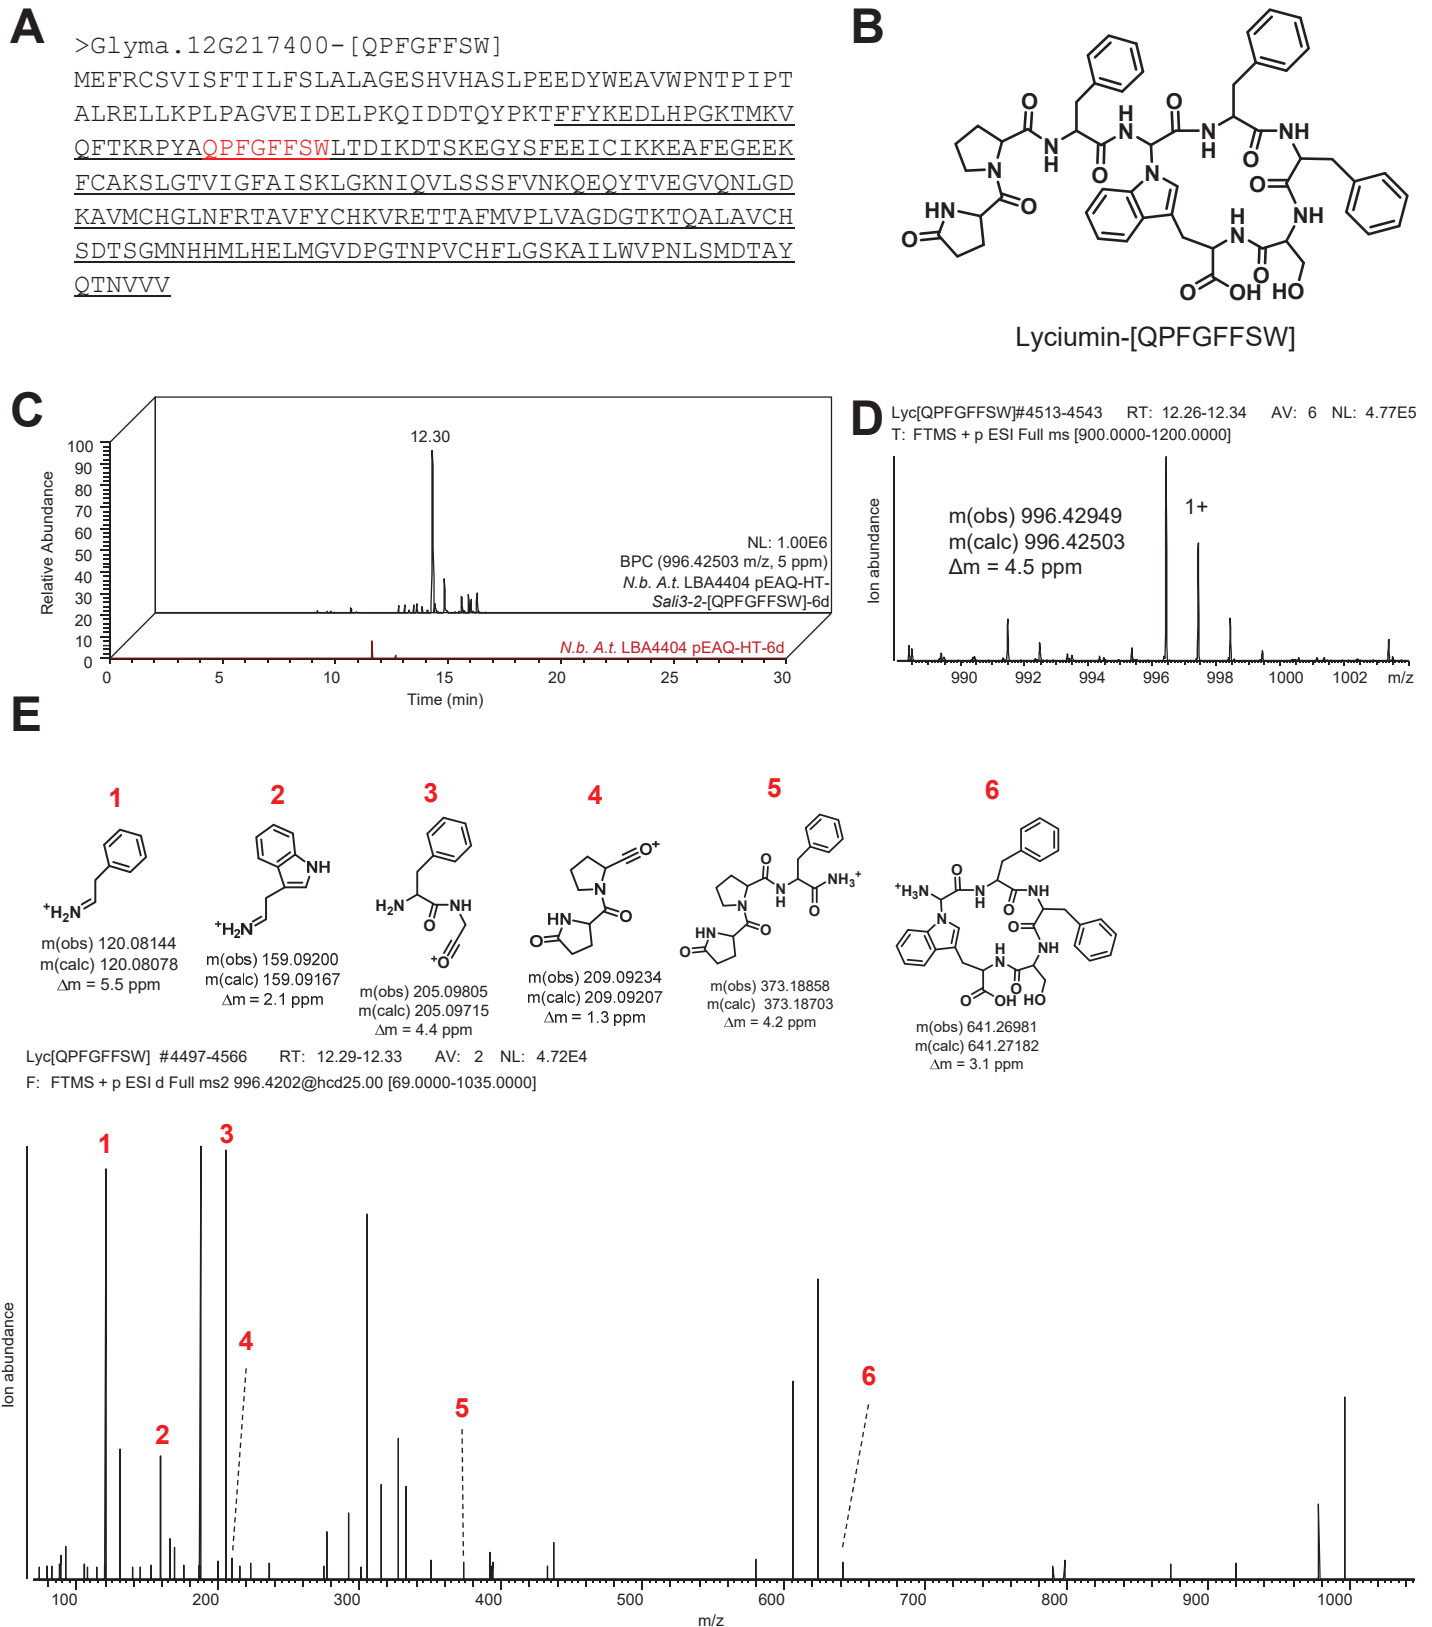

**Figure S43 | Heterologous expression of *Sali3-2*-[QPF<sub>G</sub>FFSW] in *Nicotiana benthamiana*.** (A) *Sali3-2*-[QPF<sub>G</sub>FFSW] lyciumin precursor peptide (BURP domain underlined, core peptide highlighted in red). (B) Predicted [QPF<sub>G</sub>FFSW]-lyciumin chemotype. (C) LC-MS chemotyping of predicted [QPF<sub>G</sub>FFSW]-lyciumin in peptide extract of *N. benthamiana* leaves infiltrated with *A. tumefaciens* LBA4404 pEAQ-HT-*Sali3-2*-[QPF<sub>G</sub>FFSW] for six days. (D) MS analysis of predicted [QPF<sub>G</sub>FFSW]-lyciumin chemotype. (E) MS/MS analysis of predicted [QPF<sub>G</sub>FFSW]-lyciumin chemotype.

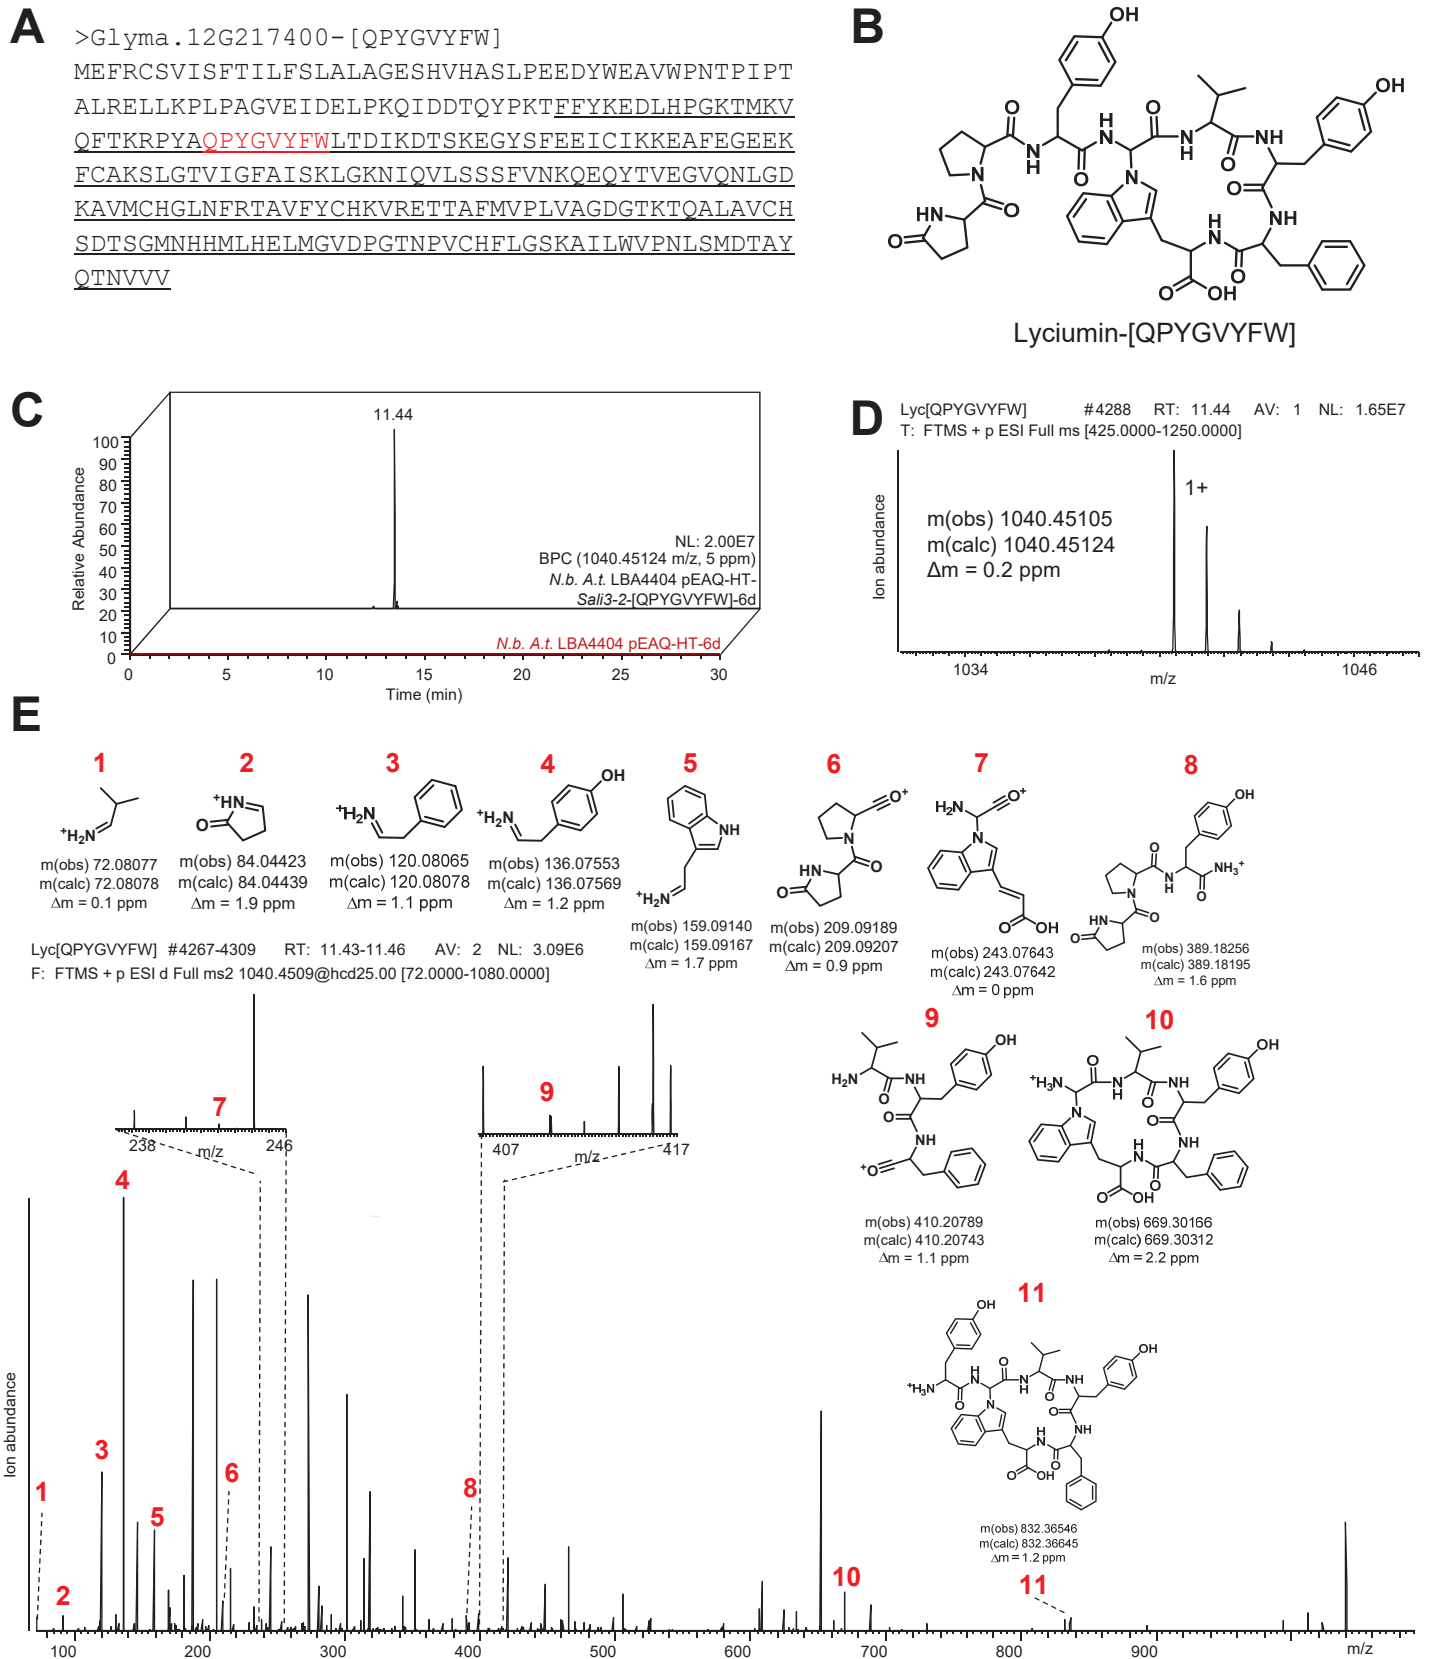

**Figure S44 | Heterologous expression of *Sali3-2*-[QPYGVYFW] in *Nicotiana benthamiana*.** (A) *Sali3-2*-[QPYGVYFW] lyciumin precursor peptide (BURP domain underlined, core peptide highlighted in red). (B) Predicted [QPYGVYFW]-lyciumin chemotype. (C) LC-MS chemotyping of predicted [QPYGVYFW]-lyciumin in peptide extract of *N. benthamiana* leaves infiltrated with *A. tumefaciens* LBA4404 pEAQ-HT-*Sali3-2*-[QPYGVYFW] for six days. (D) MS analysis of predicted [QPYGVYFW]-lyciumin chemotype. (E) MS/MS analysis of predicted [QPYGVYFW]-lyciumin chemotype.

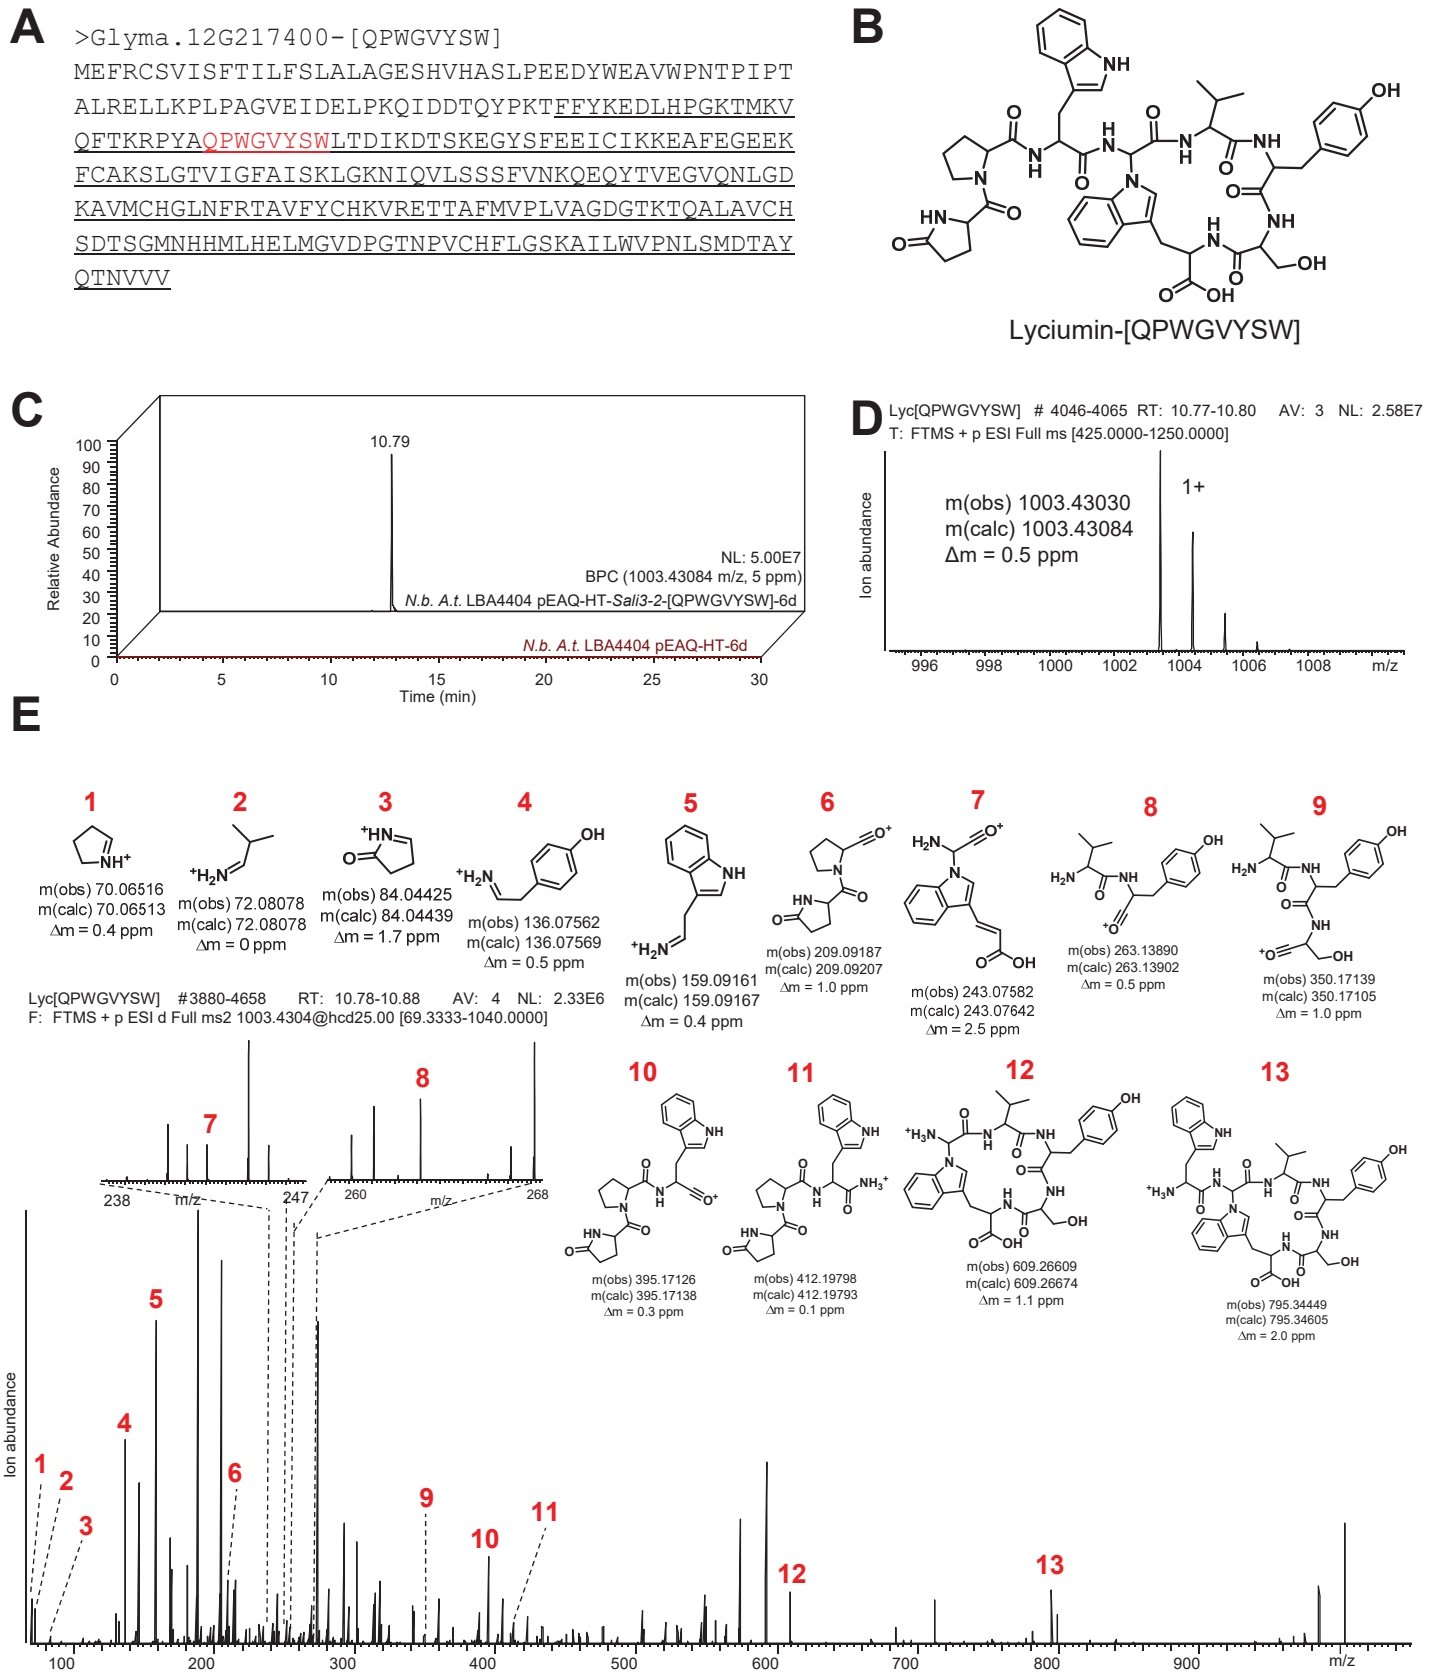

**Figure S45 | Heterologous expression of *Sali3-2*-[QPWGVYSW] in *Nicotiana benthamiana*. (A) *Sali3-2*-[QPWGVYSW] lyciumin precursor peptide (BURP domain underlined, core peptide highlighted in red). (B) Predicted [QPWGVYSW]-lyciumin chemotype. (C) LC-MS chemotyping of predicted [QPWGVYSW]-lyciumin in peptide extract of *N. benthamiana* leaves infiltrated with *A. tumefaciens* LBA4404 pEAQ-HT-*Sali3-2*-[QPWGVYSW] for six days. (D) MS analysis of predicted [QPWGVYSW]-lyciumin chemotype. (E) MS/MS analysis of predicted [QPWGVYSW]-lyciumin chemotype.**

## References

1. Bassüner R *et al.* (1988) Abundant embryonic mRNA in field bean (*Vicia faba* L.) codes for a new class of seed proteins: cDNA cloning and characterization of the primary translation product. *Plant Mol Biol* 11(3): pp 321–334.
2. Yamaguchi-Shinozaki K, Shinozaki K (1993) The plant hormone abscisic acid mediates the drought-induced expression but not the seed-specific expression of rd22, a gene responsive to dehydration stress in *Arabidopsis thaliana*. *Mol Gen Genet* 238(1-2): pp 17–25.
3. Zheng L, Heupel RC, DellaPenna D (1992) The b Subunit of Tomato Fruit Polygalacturonase Isoenzyme 1: Isolation, Characterization, and Identification of Unique Structural Features. *Plant Cell* 4(9): pp 1147–1156.
4. Boutilier KA *et al.* (1994) Expression of the BnmNAP subfamily of napin genes coincides with the induction of Brassica microspore embryogenesis. *Plant Mol Biol* 26(6): pp 1711–1723.
5. Edgar RC (2004) MUSCLE: multiple sequence alignment with high accuracy and high throughput *Nucleic Acids Res* 32(5): pp 1792–1797.
6. Kumar S, Stecher G, Tamura K (2016) MEGA7: Molecular Evolutionary Genetics Analysis version 7.0 for bigger datasets MEGA7: Molecular Evolutionary Genetics Analysis Version 7.0 for Bigger Datasets *Mol Biol Evol* 33, pp 1870–1874.
7. Nei M, Kumar S (2000) Molecular Evolution and Phylogenetics. Oxford University Press, New York.
8. Morita H, Yoshida N, Takeya K, Itokawa H, Shiota O (1996) Configurational and conformational analyses of a cyclic octapeptide, lyciumin A, from *Lycium chinense* Mill. *Tetrahedron* 52(8): pp 2795–2802.
9. Yahara S *et al.* (1993) Cyclic peptides, acyclic diterpene glycosides and other compounds from *Lycium chinense* Mill. *Chem Pharm Bull* 41(4): pp 703–709.
10. Morita H, Suzuki H, Kobayashi J (2004) Celogenamide A, a New Cyclic Peptide from the Seeds of *Celosia argentea*. *J Nat Prod* 67(9): pp 1628–1630.
11. Li B, Dewey CN (2011) RSEM: accurate transcript quantification from RNA-Seq data with or without a reference genome. *BMC Bioinform* 12(1): pp 323.
12. Potato Genome Sequencing Consortium (2011) Genome sequence and analysis of the tuber crop potato. *Nature* 475(7355): pp 189–195.
13. Grabherr MG *et al.* Full-length transcriptome assembly from RNA-Seq data without a reference genome. *Nat Biotechnol* 29(7): pp 644–652.
14. Waese J *et al.* (2017) ePlant: Visualizing and Exploring Multiple Levels of Data for Hypothesis Generation in Plant Biology. *Plant Cell* 29: pp 1806–1821.
15. Benedito VA *et al.* (2008) A gene expression atlas of the model legume *Medicago truncatula*. *Plant J* 55(3): pp 504–513.
16. Libault M *et al.* (2010) An integrated transcriptome atlas of the crop model *Glycine max*, and its use in comparative analyses in plants. *Plant J* 63(1): pp 86–99.
17. Severin AJ *et al.* (2010) RNA-Seq Atlas of *Glycine max*: a guide to the soybean transcriptome. *BMC Plant Biol* 10(1): pp 160.
18. Priyam A *et al.* (2015) Sequenceserver: a modern graphical user interface for custom BLAST databases. *Biorxiv* 033142.
19. Gibson DG *et al.* (2009) Enzymatic assembly of DNA molecules up to several hundred kilobases. *Nat Methods* 6(5): pp 343–345.
20. Sainsbury F, Thuenemann EC, Lomonosoff GP (2009) pEAQ: versatile expression vectors for easy and quick transient expression of heterologous proteins in plants. *Plant Biotechnol J* 7(7): pp 682–693.
21. Wang MX *et al.* (2016) Sharing and community curation of mass spectrometry data with Global Natural Products Social Molecular Networking. *Nat Biotechnol* 34(8): pp 828–837.
